# Supplementary material for: CircBARD1 suppresses tumor progression driven by H3K18 lactylation- CCNA2 axis in human bladder cancer
Source: Research Square preprint supplement (doi:10.21203/rs.3.rs-7337848/v1), 2025-08-29
Supplement: Supplementary file 1 [file 567d47eabe2d162c03db3a2f.docx]

**CircBARD1 suppresses tumor progression driven by H3K18 lactylation-CCNA2 axis in human bladder cancer**

#Zhenghui Hu1, #Nan Jiang3, #Bo Xie1, Juntao Lin1, Xianwu Chen1, Xuejian Zhou1, Yan Zhang1, Mengjing Fan2, Ning He1, *Xiaodong Jin3, *Feifan Wang1

1Department of Urology, The First Affiliated Hospital, Zhejiang University School of Medicine, Hangzhou, Zhejiang, 310003, R.P. China.

2 Department of Pathology, Sir Run Run Shaw Hospital, Zhejiang University School of Medicine, Hangzhou, Zhejiang, 310016, R.P. China.

3Department of Urology, The First Affiliated Hospital, Zhejiang Chinese Medical University, Hangzhou, Zhejiang, 310000, R.P. China.

#Zhenghui Hu, Nan Jiang and Bo Xie contributed equally to this work.

**Correspondence:**

Feifan Wang, Department of Urology, The First Affiliated Hospital, Zhejiang University School of Medicine, Hangzhou, Zhejiang, 310003, R.P. China;

E-mail: 1322083@zju.edu.cn

Xiaodong Jin, Department of Urology, The First Affiliated Hospital, Zhejiang Chinese Medical University, Hangzhou, Zhejiang, 310000, R.P. China;

E-mail: 20233003@zcmu.edu.cn

**Table S1. The sequences of primers and oligonucleotides used in this study**

| **Primers** | |
| --- | --- |
| circ-BARD1 F | AGCTGTTGCCCAATATGGCT |
| circ-BARD1 R | GGACATCCAGTTCCAATGCAG |
| Linear BARD1 F | AGCTGTTGCCCAATATGGCT |
| Linear BARD1 R | AAGAGGTCCATCCCTACGCT |
| GAPDH F | GTCAAGGCTGAGAACGGGAA |
| GAPDH R | AAATGAGCCCCAGCCTTCTC |
| CCNA2 F | GCACTGGTGGTCTGTGTTCT |
| CCNA2 R | GCCAGTCTTACTCATAGCTGACA |
| **siRNAs Targeting sequence** | |
| Si CCNA2 |  |
| **Probes for RNA Fluorescence in situ hybridization and RIP-MS** | |
| Hsa_circ_0058055 target sequence | ATTGCTTCTATTAAGTACTAA |
