# Supplementary material for: CircBARD1 suppresses tumor progression driven by H3K18 lactylation- CCNA2 axis in human bladder cancer
Source: Research Square preprint supplement (doi:10.21203/rs.3.rs-7337848/v1), 2025-08-29
Supplement: Supplementary file 2 [file 73f3e1a906749e1d8af783c4.xlsx]

## Sheet: Sheet1
gene_id	gene_name	EntrezID	transcript_id	GO	KEGG	KO_ENTRY	EC	TF_Family	Description	trans_type	DO	Reactome	FPKM.T24_NC	FPKM.T24_OE	fc	log2(fc)	pval	qval	regulation	significant
ENSG00000258017	ENSG00000258017		ENST00000548149;ENST00000656133;ENST00000667827;ENST00000687351	NA	NA	NA	NA	NA	novel transcript, antisense to TUBA1B	lncRNA	NA	NA	26.1606	0.805131	32.4923	5.02203	5.97694e-89	7.63136e-85	up	yes
ENSG00000130487	KLHDC7B	113730	ENST00000434237;ENST00000648057;ENST00000395676	GO:0005515(protein binding);GO:0005515(protein binding)	NA	NA	NA	NA	kelch domain containing 7B [Source:HGNC Symbol;Acc:HGNC:25145]	processed_transcript;protein_coding	NA	NA	0.172934	7.2578	0.0238273	-5.39124	5.25444e-81	3.35444e-77	down	yes
ENSG00000119139	TJP2	9414	ENST00000636438;ENST00000648460;ENST00000377259;ENST00000348208;ENST00000377245;ENST00000648087;ENST00000498204;ENST00000423935;ENST00000650353;ENST00000647986;ENST00000648862;ENST00000413932;ENST00000649943;ENST00000649927;ENST00000643713	GO:0004385(guanylate kinase activity);GO:0005515(protein binding);GO:0005634(nucleus);GO:0005654(nucleoplasm);GO:0005829(cytosol);GO:0005886(plasma membrane);GO:0005912(adherens junction);GO:0005923(bicellular tight junction);GO:0016020(membrane);GO:0019904(protein domain specific binding);GO:0030054(cell junction);GO:0030674(protein-macromolecule adaptor activity);GO:0034109(homotypic cell-cell …	04530(Tight junction);05110(Vibrio cholerae infection);05110(Vibrio cholerae infection)	NA	NA	NA	tight junction protein 2 [Source:HGNC Symbol;Acc:HGNC:11828]	protein_coding;retained_intron	NA	R-HSA-2064406(Translocation of YAP1:ZO-2 (TJP2) to the nucleus);R-HSA-2064418(WWTR1 (TAZ) binds ZO-2 (TJP2));R-HSA-2064421(YAP1 binds ZO-2 (TJP2));R-HSA-351871(Caspase-mediated cleavage of Z0-2);R-HSA-9013009(RHOA binds effectors at the plasma membrane);R-HSA-9013024(RHOB binds effectors at the plasma membrane);R-HSA-9013110(RHOC binds effectors at the plasma membrane)	6.04033	0.249239	24.2351	4.59903	3.1351e-77	1.3343e-73	up	yes
ENSG00000176046	NUPR1	26471	ENST00000324873;ENST00000395641;ENST00000567646	GO:0002526(acute inflammatory response);GO:0003677(DNA binding);GO:0003682(chromatin binding);GO:0003713(transcription coactivator activity);GO:0005515(protein binding);GO:0005634(nucleus);GO:0005654(nucleoplasm);GO:0005737(cytoplasm);GO:0006473(protein acetylation);GO:0008285(negative regulation of cell population proliferation);GO:0008584(male gonad development);GO:0009636(response to toxic sub…	05202(Transcriptional misregulation in cancer);05202(Transcriptional misregulation in cancer)	NA	NA	NA	nuclear protein 1, transcriptional regulator [Source:HGNC Symbol;Acc:HGNC:29990]	protein_coding;nonsense_mediated_decay	DOID:0050686(organ_system_cancer);DOID:114(heart_disease);DOID:1287(cardiovascular_system_disease);DOID:14566(disease_of_cellular_proliferation);DOID:162(cancer);DOID:170(endocrine_gland_cancer);DOID:1781(thyroid_cancer);DOID:3962(follicular_thyroid_carcinoma);DOID:3963(thyroid_carcinoma);DOID:3973(thyroid_medullary_carcinoma);DOID:4(disease);DOID:6000(congestive_heart_failure);DOID:7(disease_of_…	NA	0.652874	15.6581	0.0416955	-4.58396	8.90321e-75	2.8419e-71	down	yes
ENSG00000173110	HSPA6	3310	ENST00000309758	GO:0000166(nucleotide binding);GO:0005515(protein binding);GO:0005524(ATP binding);GO:0005576(extracellular region);GO:0005634(nucleus);GO:0005737(cytoplasm);GO:0005814(centriole);GO:0005829(cytosol);GO:0005886(plasma membrane);GO:0006457(protein folding);GO:0006986(response to unfolded protein);GO:0008180(COP9 signalosome);GO:0016192(vesicle-mediated transport);GO:0016887(ATP hydrolysis activity…	03040(Spliceosome);04010(MAPK signaling pathway);04141(Protein processing in endoplasmic reticulum);04144(Endocytosis);04213(Longevity regulating pathway - multiple species);04612(Antigen processing and presentation);04915(Estrogen signaling pathway);05020(Prion disease);05134(Legionellosis);05145(Toxoplasmosis);05162(Measles)	NA	NA	NA	heat shock protein family A (Hsp70) member 6 [Source:HGNC Symbol;Acc:HGNC:5239]	protein_coding	DOID:1287(cardiovascular_system_disease);DOID:178(vascular_disease);DOID:4(disease);DOID:7(disease_of_anatomical_entity)	R-HSA-5251942(Hikeshi binds HSP70s:ATP);R-HSA-5251955(HSP40s activate intrinsic ATPase activity of HSP70s in the nucleoplasm);R-HSA-5251959(HSP40s activate intrinsic ATPase activity of HSP70s in the cytosol);R-HSA-5252041(NPC transports Hikeshi:HSP70s:ATP from cytosol to nucleoplasm);R-HSA-5252079(HSP110s exchange ATP for ADP on HSP70s:ADP);R-HSA-6798748(Exocytosis of secretory granule lumen prot…	0.455931	12.1413	0.037552	-4.73497	1.32384e-66	3.38056e-63	down	yes
ENSG00000185885	IFITM1	8519	ENST00000408968;ENST00000681702;ENST00000680588;ENST00000680611;ENST00000679765;ENST00000679353;ENST00000681938;ENST00000681577;ENST00000680696;ENST00000680699;ENST00000528780;ENST00000681180;ENST00000328221;ENST00000680342;ENST00000680299	GO:0001503(ossification);GO:0002376(immune system process);GO:0005515(protein binding);GO:0005764(lysosome);GO:0005765(lysosomal membrane);GO:0005886(plasma membrane);GO:0007166(cell surface receptor signaling pathway);GO:0008285(negative regulation of cell population proliferation);GO:0009615(response to virus);GO:0016020(membrane);GO:0016021(integral component of membrane);GO:0030336(negative r…	04662(B cell receptor signaling pathway);04662(B cell receptor signaling pathway)	NA	NA	NA	interferon induced transmembrane protein 1 [Source:HGNC Symbol;Acc:HGNC:5412]	protein_coding;processed_transcript;nonsense_mediated_decay	DOID:0050117(disease_by_infectious_agent);DOID:0050686(organ_system_cancer);DOID:0050687(cell_type_cancer);DOID:0060083(immune_system_cancer);DOID:1036(chronic_leukemia);DOID:120(female_reproductive_organ_cancer);DOID:1240(leukemia);DOID:14566(disease_of_cellular_proliferation);DOID:162(cancer);DOID:1749(squamous_cell_carcinoma);DOID:193(reproductive_organ_cancer);DOID:225(syndrome);DOID:2531(hem…	R-HSA-1015702(Expression of IFN-induced genes);R-HSA-199518(C3d-complexed antigen binds to complement receptor)	11.8649	191.727	0.061884	-4.01429	6.60763e-66	1.4061e-62	down	yes
ENSG00000175197	DDIT3	1649	ENST00000346473;ENST00000547303;ENST00000552740;ENST00000551116;ENST00000623876	GO:0000122(negative regulation of transcription by RNA polymerase II);GO:0000785(chromatin);GO:0000976(transcription cis-regulatory region binding);GO:0000978(RNA polymerase II cis-regulatory region sequence-specific DNA binding);GO:0000981(DNA-binding transcription factor activity, RNA polymerase II-specific);GO:0001228(DNA-binding transcription activator activity, RNA polymerase II-specific);GO…	04010(MAPK signaling pathway);04141(Protein processing in endoplasmic reticulum);04210(Apoptosis);04932(Non-alcoholic fatty liver disease);05010(Alzheimer disease);05012(Parkinson disease);05014(Amyotrophic lateral sclerosis);05020(Prion disease);05022(Pathways of neurodegeneration - multiple diseases);05202(Transcriptional misregulation in cancer);05202(Transcriptional misregulation in cancer)	NA	NA	TF_bZIP	DNA damage inducible transcript 3 [Source:HGNC Symbol;Acc:HGNC:2726]	protein_coding	DOID:0014667(disease_of_metabolism);DOID:0050013(carbohydrate_metabolism_disease);DOID:0050615(respiratory_system_cancer);DOID:0050686(organ_system_cancer);DOID:0050687(cell_type_cancer);DOID:0060083(immune_system_cancer);DOID:0060100(musculoskeletal_system_cancer);DOID:0060158(acquired_metabolic_disease);DOID:0080001(bone_disease);DOID:1115(sarcoma);DOID:11714(gestational_diabetes);DOID:1192(per…	R-HSA-1791107(Expression of DDIT3 (CHOP, GADD153) in response to unfolded protein);R-HSA-9622604(BCL2L11 gene expression is stimulated by FOXO1,FOXO3,(FOXO4) and NF-Y);R-HSA-9622667(BBC3 gene expression is stimulated by FOXO3,(FOXO1));R-HSA-9635912(Expression of TRIB3 in response to stress);R-HSA-9635927(ATF4 and a CEBP protein bind the TRIB3 promoter);R-HSA-9650722(Translation of DDIT3);R-HSA-96…	8.67068	143.498	0.0604239	-4.04874	3.27131e-65	5.96687e-62	down	yes
ENSG00000130513	GDF15	9518	ENST00000252809;ENST00000595973;ENST00000594925;ENST00000597765	GO:0002023(reduction of food intake in response to dietary excess);GO:0005125(cytokine activity);GO:0005515(protein binding);GO:0005576(extracellular region);GO:0005615(extracellular space);GO:0005634(nucleus);GO:0005737(cytoplasm);GO:0005794(Golgi apparatus);GO:0007165(signal transduction);GO:0007179(transforming growth factor beta receptor signaling pathway);GO:0007267(cell-cell signaling);GO:0…	04060(Cytokine-cytokine receptor interaction);04060(Cytokine-cytokine receptor interaction)	NA	NA	NA	growth differentiation factor 15 [Source:HGNC Symbol;Acc:HGNC:30142]	protein_coding;processed_transcript	DOID:0014667(disease_of_metabolism);DOID:0050013(carbohydrate_metabolism_disease);DOID:0050177(monogenic_disease);DOID:0050686(organ_system_cancer);DOID:0050687(cell_type_cancer);DOID:0050737(autosomal_recessive_disease);DOID:0050739(autosomal_genetic_disease);DOID:0050828(artery_disease);DOID:0060072(benign_neoplasm);DOID:0060084(cell_type_benign_neoplasm);DOID:0060158(acquired_metabolic_disease…	NA	71.8913	1022.04	0.0703413	-3.82948	7.8008e-62	1.24501e-58	down	yes
ENSG00000104951	IL4I1	259307	ENST00000391826	GO:0001669(acrosomal vesicle);GO:0001716(L-amino-acid oxidase activity);GO:0001772(immunological synapse);GO:0002250(adaptive immune response);GO:0002376(immune system process);GO:0002819(regulation of adaptive immune response);GO:0002841(negative regulation of T cell mediated immune response to tumor cell);GO:0005515(protein binding);GO:0005576(extracellular region);GO:0005764(lysosome);GO:00065…	00250(Alanine, aspartate and glutamate metabolism);00270(Cysteine and methionine metabolism);00280(Valine, leucine and isoleucine degradation);00350(Tyrosine metabolism);00360(Phenylalanine metabolism);00380(Tryptophan metabolism);00400(Phenylalanine, tyrosine and tryptophan biosynthesis);01100(Metabolic pathways)	K03334	EC:1.4.3.2	NA	interleukin 4 induced 1 [Source:HGNC Symbol;Acc:HGNC:19094]	protein_coding	NA	R-HSA-2160492(IL4I1:FAD oxidises L-Phe to kPPV)	1.77564	28.2193	0.0629228	-3.99027	1.99864e-60	2.8354e-57	down	yes
ENSG00000268173	ENSG00000268173		ENST00000593731	NA	NA	NA	NA	NA	novel protein, readthrough between PIK3R2 and IFI30	nonsense_mediated_decay	NA	NA	15.4667	1.27035	12.1752	3.60587	3.22751e-54	4.12089e-51	up	yes
ENSG00000130766	SESN2	83667	ENST00000253063	GO:0001932(regulation of protein phosphorylation);GO:0005092(GDP-dissociation inhibitor activity);GO:0005515(protein binding);GO:0005634(nucleus);GO:0005737(cytoplasm);GO:0005739(mitochondrion);GO:0005829(cytosol);GO:0006111(regulation of gluconeogenesis);GO:0006635(fatty acid beta-oxidation);GO:0007005(mitochondrion organization);GO:0009749(response to glucose);GO:0016239(positive regulation of …	04115(p53 signaling pathway);04150(mTOR signaling pathway);04211(Longevity regulating pathway)	NA	NA	NA	sestrin 2 [Source:HGNC Symbol;Acc:HGNC:20746]	protein_coding	NA	R-HSA-5629189(TP53 stimulates expression of SESN1,2,3 genes);R-HSA-5631903(SESN1,2,3 bind overoxidized PRDX1);R-HSA-5631941(SESN1,2,3 bind AMPK);R-HSA-9639287(SESN1,2 binds L-leucine and dissociates from GATOR2);R-HSA-9640195(RRAGA,B hydrolyzes GTP);R-HSA-9766645(CUL3:RBX1 ubiquitinates KEAP1);R-HSA-9766656(RBX1:CUL3 dissociates from forming autophagosome);R-HSA-9766677(MAP1LC3B binds KEAP1 and S…	8.72422	99.9591	0.087278	-3.51824	1.84942e-53	2.14667e-50	down	yes
ENSG00000163121	NEURL3	93082,54492	ENST00000444588;ENST00000310865;ENST00000451794	GO:0016567(protein ubiquitination);GO:0016740(transferase activity);GO:0046872(metal ion binding);GO:0061630(ubiquitin protein ligase activity);GO:0061630(ubiquitin protein ligase activity)	NA	K15689	EC:2.3.2.27	NA	neuralized E3 ubiquitin protein ligase 3 [Source:HGNC Symbol;Acc:HGNC:25162]	retained_intron;protein_coding	NA	NA	0.382089	7.21975	0.0529227	-4.23997	3.89209e-53	4.14118e-50	down	yes
ENSG00000051108	HERPUD1	9709	ENST00000300302;ENST00000564678;ENST00000439977;ENST00000563911;ENST00000569569;ENST00000563343;ENST00000344114;ENST00000568651;ENST00000379792;ENST00000570273;ENST00000568676;ENST00000566550;ENST00000563781;ENST00000567944;ENST00000568814;ENST00000562914;ENST00000569429	GO:0003674(molecular_function);GO:0005515(protein binding);GO:0005783(endoplasmic reticulum);GO:0005789(endoplasmic reticulum membrane);GO:0006511(ubiquitin-dependent protein catabolic process);GO:0006986(response to unfolded protein);GO:0016020(membrane);GO:0016021(integral component of membrane);GO:0030433(ubiquitin-dependent ERAD pathway);GO:0030968(endoplasmic reticulum unfolded protein respo…	04141(Protein processing in endoplasmic reticulum);04141(Protein processing in endoplasmic reticulum)	NA	NA	NA	homocysteine inducible ER protein with ubiquitin like domain 1 [Source:HGNC Symbol;Acc:HGNC:13744]	protein_coding;retained_intron;processed_transcript	NA	R-HSA-1791095(Expression of HERPUD)	16.7237	186.662	0.0895937	-3.48046	8.5049e-53	8.35312e-50	down	yes
ENSG00000128965	CHAC1	79094	ENST00000617768;ENST00000487220;ENST00000444189	GO:0003839(gamma-glutamylcyclotransferase activity);GO:0005112(Notch binding);GO:0005515(protein binding);GO:0005737(cytoplasm);GO:0005794(Golgi apparatus);GO:0005802(trans-Golgi network);GO:0005829(cytosol);GO:0006750(glutathione biosynthetic process);GO:0006751(glutathione catabolic process);GO:0006915(apoptotic process);GO:0006986(response to unfolded protein);GO:0007219(Notch signaling pathwa…	00480(Glutathione metabolism);01100(Metabolic pathways);01100(Metabolic pathways)	K07232	EC:4.3.2.7	NA	ChaC glutathione specific gamma-glutamylcyclotransferase 1 [Source:HGNC Symbol;Acc:HGNC:28680]	protein_coding	NA	R-HSA-6785928(CHAC1,2 cleaves GSH to OPRO and CysGly);R-HSA-9653894(Expression of CHAC1)	4.55563	54.3241	0.0838602	-3.57587	1.23574e-52	1.12699e-49	down	yes
ENSG00000213347	MXD3	83463	ENST00000427908;ENST00000423571;ENST00000439742;ENST00000513063;ENST00000503782;ENST00000502529;ENST00000509339	GO:0000122(negative regulation of transcription by RNA polymerase II);GO:0000785(chromatin);GO:0000977(RNA polymerase II transcription regulatory region sequence-specific DNA binding);GO:0000978(RNA polymerase II cis-regulatory region sequence-specific DNA binding);GO:0000981(DNA-binding transcription factor activity, RNA polymerase II-specific);GO:0001227(DNA-binding transcription repressor acti…	NA	NA	NA	bHLH	MAX dimerization protein 3 [Source:HGNC Symbol;Acc:HGNC:14008]	protein_coding;retained_intron	NA	NA	8.1938	0.672775	12.1791	3.60634	2.08754e-50	1.77691e-47	up	yes
ENSG00000128590	DNAJB9	4189	ENST00000249356;ENST00000491582	GO:0002639(positive regulation of immunoglobulin production);GO:0005515(protein binding);GO:0005730(nucleolus);GO:0005737(cytoplasm);GO:0005783(endoplasmic reticulum);GO:0005788(endoplasmic reticulum lumen);GO:0005789(endoplasmic reticulum membrane);GO:0006986(response to unfolded protein);GO:0030183(B cell differentiation);GO:0030433(ubiquitin-dependent ERAD pathway);GO:0030544(Hsp70 protein bin…	NA	NA	NA	NA	DnaJ heat shock protein family (Hsp40) member B9 [Source:HGNC Symbol;Acc:HGNC:6968]	protein_coding;retained_intron	NA	R-HSA-1791124(Expression of DNAJB9)	1.1677	14.7388	0.0792261	-3.65788	8.04519e-50	6.42006e-47	down	yes
ENSG00000007968	E2F2	1870	ENST00000361729;ENST00000487237	GO:0000785(chromatin);GO:0000977(RNA polymerase II transcription regulatory region sequence-specific DNA binding);GO:0000978(RNA polymerase II cis-regulatory region sequence-specific DNA binding);GO:0000981(DNA-binding transcription factor activity, RNA polymerase II-specific);GO:0000987(cis-regulatory region sequence-specific DNA binding);GO:0001228(DNA-binding transcription activator activity, …	01522(Endocrine resistance);04110(Cell cycle);04218(Cellular senescence);04934(Cushing syndrome);05160(Hepatitis C);05161(Hepatitis B);05163(Human cytomegalovirus infection);05166(Human T-cell leukemia virus 1 infection);05167(Kaposi sarcoma-associated herpesvirus infection);05169(Epstein-Barr virus infection);05200(Pathways in cancer);05206(MicroRNAs in cancer);05212(Pancreatic cancer);05214(Gli…	NA	NA	E2F	E2F transcription factor 2 [Source:HGNC Symbol;Acc:HGNC:3114]	protein_coding;processed_transcript	DOID:14566(disease_of_cellular_proliferation);DOID:162(cancer);DOID:4(disease)	R-HSA-3209096(E2F1, E2F2, or E2F3 and SP1 bind p14ARF promoter);R-HSA-3209109(E2F1/E2F2/E2F3 and SP1 stimulate transcription of p14ARF mRNA);R-HSA-3240765(E2F1/2/3:DP1/2 binds EED gene promoter);R-HSA-3240766(E2F1/2/3:DP1/2 binds SUZ12 gene promoter);R-HSA-3240777(E2F1/2/3:DP1/2 binds EZH2 gene promoter);R-HSA-3240782(E2F1/2/3 stimulates EED transcription);R-HSA-3240783(E2F1/2/3 stimulates EZH2 t…	3.17586	0.206923	15.348	3.93998	1.12111e-49	8.42017e-47	up	yes
ENSG00000161888	SPC24	147841	ENST00000592540;ENST00000585486;ENST00000592967;ENST00000586708;ENST00000423327	GO:0000775(chromosome, centromeric region);GO:0000776(kinetochore);GO:0005515(protein binding);GO:0005634(nucleus);GO:0005654(nucleoplasm);GO:0005694(chromosome);GO:0005730(nucleolus);GO:0005829(cytosol);GO:0007049(cell cycle);GO:0007059(chromosome segregation);GO:0007094(mitotic spindle assembly checkpoint signaling);GO:0008017(microtubule binding);GO:0008608(attachment of spindle microtubules t…	NA	NA	NA	NA	SPC24 component of NDC80 kinetochore complex [Source:HGNC Symbol;Acc:HGNC:26913]	protein_coding;nonsense_mediated_decay	NA	R-HSA-141409(Mad1 binds kinetochore);R-HSA-141422(MAD2 converted to an inhibitory state via interaction with Mad1);R-HSA-141431(MAD2 associates with the Mad1 kinetochore complex);R-HSA-141439(Release of activated MAD2 from kinetochores);R-HSA-1638803(Phosphorylation of cohesin by PLK1 at centromeres);R-HSA-1638821(PP2A-B56 dephosphorylates centromeric cohesin);R-HSA-2467809(ESPL1 (Separase) cleav…	14.5126	1.29434	11.2123	3.48701	1.14733e-48	8.13842e-46	up	yes
ENSG00000119922	IFIT2	3433	ENST00000371826;ENST00000679619;ENST00000680954;ENST00000681850;ENST00000638108	GO:0002376(immune system process);GO:0003723(RNA binding);GO:0005515(protein binding);GO:0005737(cytoplasm);GO:0005783(endoplasmic reticulum);GO:0005829(cytosol);GO:0006915(apoptotic process);GO:0008637(apoptotic mitochondrial changes);GO:0009615(response to virus);GO:0032091(negative regulation of protein binding);GO:0035457(cellular response to interferon-alpha);GO:0043065(positive regulation o…	NA	NA	NA	NA	interferon induced protein with tetratricopeptide repeats 2 [Source:HGNC Symbol;Acc:HGNC:5409]	protein_coding;processed_transcript	DOID:0050687(cell_type_cancer);DOID:14566(disease_of_cellular_proliferation);DOID:162(cancer);DOID:1749(squamous_cell_carcinoma);DOID:1909(melanoma);DOID:305(carcinoma);DOID:4(disease)	R-HSA-1015702(Expression of IFN-induced genes)	7.30599	72.9413	0.100163	-3.31958	1.5881e-48	1.0672e-45	down	yes
ENSG00000140044	JDP2	122953	ENST00000267569;ENST00000419727;ENST00000651602;ENST00000559060;ENST00000558068;ENST00000437176;ENST00000435893;ENST00000559773	GO:0000122(negative regulation of transcription by RNA polymerase II);GO:0000785(chromatin);GO:0000978(RNA polymerase II cis-regulatory region sequence-specific DNA binding);GO:0000981(DNA-binding transcription factor activity, RNA polymerase II-specific);GO:0001227(DNA-binding transcription repressor activity, RNA polymerase II-specific);GO:0003677(DNA binding);GO:0003682(chromatin binding);GO:0…	NA	NA	NA	TF_bZIP	Jun dimerization protein 2 [Source:HGNC Symbol;Acc:HGNC:17546]	protein_coding;processed_transcript	NA	NA	0.497551	5.83578	0.0852587	-3.55201	1.94031e-47	1.23869e-44	down	yes
ENSG00000131153	GINS2	51659	ENST00000253462;ENST00000595355	GO:0000228(nuclear chromosome);GO:0000727(double-strand break repair via break-induced replication);GO:0000811(GINS complex);GO:0005515(protein binding);GO:0005634(nucleus);GO:0005654(nucleoplasm);GO:0005694(chromosome);GO:0006260(DNA replication);GO:0006268(DNA unwinding involved in DNA replication);GO:0044238(primary metabolic process);GO:0071162(CMG complex);GO:0071704(organic substance metabo…	NA	NA	NA	NA	GINS complex subunit 2 [Source:HGNC Symbol;Acc:HGNC:24575]	protein_coding	NA	R-HSA-176942(Multiple proteins are localized at replication fork);R-HSA-176956(Formation of GINS complex)	30.9819	3.26286	9.49534	3.24722	8.97923e-47	5.45937e-44	up	yes
ENSG00000079385	CEACAM1	634	ENST00000485605;ENST00000403444;ENST00000465051;ENST00000403461;ENST00000352591;ENST00000599389;ENST00000161559;ENST00000471298;ENST00000377806;ENST00000403136	GO:0001525(angiogenesis);GO:0001558(regulation of cell growth);GO:0001568(blood vessel development);GO:0001915(negative regulation of T cell mediated cytotoxicity);GO:0002682(regulation of immune system process);GO:0002859(negative regulation of natural killer cell mediated cytotoxicity directed against tumor cell target);GO:0003674(molecular_function);GO:0003779(actin binding);GO:0005515(protein…	NA	NA	NA	NA	CEA cell adhesion molecule 1 [Source:HGNC Symbol;Acc:HGNC:1814]	retained_intron;protein_coding	DOID:0050117(disease_by_infectious_agent);DOID:0050338(primary_bacterial_infectious_disease);DOID:0050615(respiratory_system_cancer);DOID:0050686(organ_system_cancer);DOID:0050687(cell_type_cancer);DOID:0060056(hypersensitivity_reaction_disease);DOID:0060072(benign_neoplasm);DOID:0060084(cell_type_benign_neoplasm);DOID:0060122(integumentary_system_cancer);DOID:10155(intestinal_cancer);DOID:10283(…	R-HSA-202717(Heterodimerization of CEACAMs);R-HSA-202723(Integrin alpha5beta1 binds FN1 dimer);R-HSA-6798747(Exocytosis of tertiary granule membrane proteins);R-HSA-6799350(Exocytosis of specific granule membrane proteins);R-HSA-8867135(CEACAM1,3,5,6 bind opa proteins)	0.281489	3.74724	0.0751189	-3.73468	9.29548e-46	5.39476e-43	down	yes
ENSG00000113739	STC2	8614	ENST00000265087;ENST00000520593;ENST00000519511;ENST00000518455;ENST00000520648	GO:0005179(hormone activity);GO:0005576(extracellular region);GO:0005615(extracellular space);GO:0005783(endoplasmic reticulum);GO:0005788(endoplasmic reticulum lumen);GO:0005794(Golgi apparatus);GO:0006874(cellular calcium ion homeostasis);GO:0006979(response to oxidative stress);GO:0007165(signal transduction);GO:0007566(embryo implantation);GO:0010629(negative regulation of gene expression);GO…	NA	NA	NA	NA	stanniocalcin 2 [Source:HGNC Symbol;Acc:HGNC:11374]	protein_coding;processed_transcript;retained_intron	DOID:0050686(organ_system_cancer);DOID:1107(esophageal_carcinoma);DOID:1192(peripheral_nervous_system_neoplasm);DOID:14566(disease_of_cellular_proliferation);DOID:162(cancer);DOID:2621(autonomic_nervous_system_neoplasm);DOID:3093(nervous_system_cancer);DOID:3119(gastrointestinal_system_cancer);DOID:4(disease);DOID:5041(esophageal_cancer);DOID:769(neuroblastoma)	R-HSA-8952289(FAM20C phosphorylates FAM20C substrates)	48.084	421.504	0.114077	-3.13192	2.16192e-44	1.20015e-41	down	yes
ENSG00000156510	HKDC1	80201	ENST00000354624;ENST00000470920;ENST00000488706	GO:0000166(nucleotide binding);GO:0001678(cellular glucose homeostasis);GO:0004340(glucokinase activity);GO:0004396(hexokinase activity);GO:0005524(ATP binding);GO:0005536(glucose binding);GO:0005739(mitochondrion);GO:0005829(cytosol);GO:0005975(carbohydrate metabolic process);GO:0006096(glycolytic process);GO:0008865(fructokinase activity);GO:0016020(membrane);GO:0016301(kinase activity);GO:0016…	00010(Glycolysis / Gluconeogenesis);00051(Fructose and mannose metabolism);00052(Galactose metabolism);00500(Starch and sucrose metabolism);00520(Amino sugar and nucleotide sugar metabolism);00524(Neomycin, kanamycin and gentamicin biosynthesis);01100(Metabolic pathways);01200(Carbon metabolism);04066(HIF-1 signaling pathway);04910(Insulin signaling pathway);04930(Type II diabetes mellitus);04973…	K00844	EC:2.7.1.1	NA	hexokinase domain containing 1 [Source:HGNC Symbol;Acc:HGNC:23302]	protein_coding;processed_transcript	NA	NA	0.493697	5.63264	0.0876493	-3.51211	1.22781e-43	6.53197e-41	down	yes
ENSG00000140961	OSGIN1	29948	ENST00000393306;ENST00000567707;ENST00000563543;ENST00000565123	GO:0005515(protein binding);GO:0005575(cellular_component);GO:0007165(signal transduction);GO:0008083(growth factor activity);GO:0030154(cell differentiation);GO:0030308(negative regulation of cell growth);GO:0030334(regulation of cell migration);GO:0040008(regulation of growth);GO:0042127(regulation of cell population proliferation);GO:0042981(regulation of apoptotic process);GO:0043065(positive…	NA	NA	NA	NA	oxidative stress induced growth inhibitor 1 [Source:HGNC Symbol;Acc:HGNC:30093]	protein_coding;processed_transcript	DOID:0050686(organ_system_cancer);DOID:14566(disease_of_cellular_proliferation);DOID:162(cancer);DOID:3119(gastrointestinal_system_cancer);DOID:3571(liver_cancer);DOID:4(disease);DOID:684(hepatocellular_carcinoma);DOID:686(liver_carcinoma)	NA	3.81396	32.6517	0.116807	-3.0978	6.77203e-43	3.45861e-40	down	yes
ENSG00000134321	RSAD2	91543	ENST00000382040;ENST00000680320;ENST00000489749;ENST00000680607;ENST00000477834	GO:0001650(fibrillar center);GO:0002376(immune system process);GO:0003824(catalytic activity);GO:0005515(protein binding);GO:0005739(mitochondrion);GO:0005741(mitochondrial outer membrane);GO:0005743(mitochondrial inner membrane);GO:0005783(endoplasmic reticulum);GO:0005789(endoplasmic reticulum membrane);GO:0005794(Golgi apparatus);GO:0005811(lipid droplet);GO:0009615(response to virus);GO:00160…	05160(Hepatitis C);05164(Influenza A);05164(Influenza A)	NA	NA	NA	radical S-adenosyl methionine domain containing 2 [Source:HGNC Symbol;Acc:HGNC:30908]	protein_coding;retained_intron;processed_transcript	DOID:0050117(disease_by_infectious_agent);DOID:0050828(artery_disease);DOID:10844(Japanese_encephalitis);DOID:1287(cardiovascular_system_disease);DOID:178(vascular_disease);DOID:1883(hepatitis_C);DOID:1936(atherosclerosis);DOID:2237(hepatitis);DOID:2348(arteriosclerotic_cardiovascular_disease);DOID:2349(arteriosclerosis);DOID:3118(hepatobiliary_disease);DOID:331(central_nervous_system_disease);DO…	R-HSA-1015702(Expression of IFN-induced genes)	3.07187	26.2547	0.117003	-3.09539	1.02033e-42	5.01063e-40	down	yes
ENSG00000145107	TM4SF19	116211	ENST00000273695;ENST00000446879;ENST00000454715;ENST00000440822	GO:0005515(protein binding);GO:0016020(membrane);GO:0016021(integral component of membrane);GO:0016021(integral component of membrane)	NA	NA	NA	NA	transmembrane 4 L six family member 19 [Source:HGNC Symbol;Acc:HGNC:25167]	protein_coding	NA	NA	28.2808	236.644	0.119508	-3.06483	1.46891e-42	6.94632e-40	down	yes
ENSG00000116701	NCF2	4688	ENST00000367535;ENST00000413720;ENST00000367536;ENST00000420553;ENST00000697330;ENST00000697329;ENST00000697353;ENST00000469280;ENST00000419402;ENST00000697351	GO:0001669(acrosomal vesicle);GO:0005515(protein binding);GO:0005737(cytoplasm);GO:0005829(cytosol);GO:0005886(plasma membrane);GO:0006801(superoxide metabolic process);GO:0006909(phagocytosis);GO:0006968(cellular defense response);GO:0008022(protein C-terminus binding);GO:0009055(electron transfer activity);GO:0016020(membrane);GO:0016175(superoxide-generating NAD(P)H oxidase activity);GO:001617…	04145(Phagosome);04380(Osteoclast differentiation);04670(Leukocyte transendothelial migration);05020(Prion disease);05140(Leishmaniasis);05418(Fluid shear stress and atherosclerosis);05418(Fluid shear stress and atherosclerosis)	NA	NA	NA	neutrophil cytosolic factor 2 [Source:HGNC Symbol;Acc:HGNC:7661]	protein_coding;retained_intron;processed_transcript	DOID:0050161(lower_respiratory_tract_disease);DOID:0050686(organ_system_cancer);DOID:1192(peripheral_nervous_system_neoplasm);DOID:14566(disease_of_cellular_proliferation);DOID:1579(respiratory_system_disease);DOID:162(cancer);DOID:2621(autonomic_nervous_system_neoplasm);DOID:2914(immune_system_disease);DOID:3082(interstitial_lung_disease);DOID:3093(nervous_system_cancer);DOID:3262(phagocyte_bact…	R-HSA-1222376(NOX2 generates superoxide from oxygen);R-HSA-1236967(Alkalization of the phagosomal lumen by NOX2);R-HSA-5218827(NADPH oxidase 2 (NOX2) complex binds RAC1);R-HSA-5218841(NADPH oxidase 2 generates superoxide from oxygen);R-HSA-5668605(RAC2:GTP binds NOX2 complex);R-HSA-5668629(Production of phagocyte oxygen radicals by NOX2 complex bound to RAC2:GTP);R-HSA-5668731(NOX3 complex:RAC1:G…	0.679864	6.84088	0.0993826	-3.33086	8.95322e-42	4.08267e-39	down	yes
ENSG00000136826	KLF4	9314	ENST00000374672;ENST00000497048;ENST00000411706;ENST00000420475;ENST00000493306	GO:0000122(negative regulation of transcription by RNA polymerase II);GO:0000785(chromatin);GO:0000791(euchromatin);GO:0000976(transcription cis-regulatory region binding);GO:0000978(RNA polymerase II cis-regulatory region sequence-specific DNA binding);GO:0000981(DNA-binding transcription factor activity, RNA polymerase II-specific);GO:0000987(cis-regulatory region sequence-specific DNA binding)…	04550(Signaling pathways regulating pluripotency of stem cells);04550(Signaling pathways regulating pluripotency of stem cells)	NA	NA	zf-C2H2	Kruppel like factor 4 [Source:HGNC Symbol;Acc:HGNC:6348]	protein_coding;retained_intron	DOID:0014667(disease_of_metabolism);DOID:0050013(carbohydrate_metabolism_disease);DOID:0050624(gastrointestinal_system_benign_neoplasm);DOID:0050686(organ_system_cancer);DOID:0050687(cell_type_cancer);DOID:0060072(benign_neoplasm);DOID:0060085(organ_system_benign_neoplasm);DOID:0060100(musculoskeletal_system_cancer);DOID:0060122(integumentary_system_cancer);DOID:0060158(acquired_metabolic_disease…	R-HSA-381337(Expression of CEBPB in adipogenesis);R-HSA-422088(Expression of Preproghrelin);R-HSA-452838(Expression of NANOG);R-HSA-480204(POU5F1 (OCT4), SOX2, NANOG, KLF4, PBX1, SMAD2 bind the NANOG promoter);R-HSA-9625409(KLF4 gene expression is stimulated by FOXO1,FOXO3)	5.41893	44.812	0.120926	-3.04781	1.12759e-41	4.96449e-39	down	yes
ENSG00000128242	GAL3ST1	9514	ENST00000448604;ENST00000406955;ENST00000338911;ENST00000452827;ENST00000423371;ENST00000431313;ENST00000427899;ENST00000406361;ENST00000428682;ENST00000453479;ENST00000402321	GO:0000139(Golgi membrane);GO:0001733(galactosylceramide sulfotransferase activity);GO:0003824(catalytic activity);GO:0005794(Golgi apparatus);GO:0005887(integral component of plasma membrane);GO:0006487(protein N-linked glycosylation);GO:0006629(lipid metabolic process);GO:0006665(sphingolipid metabolic process);GO:0006681(galactosylceramide metabolic process);GO:0006682(galactosylceramide biosy…	00565(Ether lipid metabolism);00600(Sphingolipid metabolism);01100(Metabolic pathways);01100(Metabolic pathways)	K01019	EC:2.8.2.11	NA	galactose-3-O-sulfotransferase 1 [Source:HGNC Symbol;Acc:HGNC:24240]	protein_coding	DOID:0014667(disease_of_metabolism);DOID:0050013(carbohydrate_metabolism_disease);DOID:0060158(acquired_metabolic_disease);DOID:4194(glucose_metabolism_disease);DOID:4(disease);DOID:9351(diabetes_mellitus)	NA	3.97791	0.317213	12.5402	3.64849	8.19757e-41	3.48889e-38	up	yes
ENSG00000163485	ADORA1	134	ENST00000367235;ENST00000367236;ENST00000472535;ENST00000309502;ENST00000337894;ENST00000640524	GO:0001609(G protein-coupled adenosine receptor activity);GO:0001659(temperature homeostasis);GO:0001664(G protein-coupled receptor binding);GO:0001666(response to hypoxia);GO:0001883(purine nucleoside binding);GO:0001973(G protein-coupled adenosine receptor signaling pathway);GO:0002087(regulation of respiratory gaseous exchange by nervous system process);GO:0002674(negative regulation of acute …	04022(cGMP-PKG signaling pathway);04024(cAMP signaling pathway);04071(Sphingolipid signaling pathway);04080(Neuroactive ligand-receptor interaction);04923(Regulation of lipolysis in adipocytes);04924(Renin secretion);05032(Morphine addiction);05032(Morphine addiction)	NA	NA	NA	adenosine A1 receptor [Source:HGNC Symbol;Acc:HGNC:262]	protein_coding;processed_transcript	DOID:0050700(cardiomyopathy);DOID:0060036(intrinsic_cardiomyopathy);DOID:114(heart_disease);DOID:11870(Pick's_disease);DOID:1287(cardiovascular_system_disease);DOID:1289(neurodegenerative_disease);DOID:12930(dilated_cardiomyopathy);DOID:14566(disease_of_cellular_proliferation);DOID:150(disease_of_mental_health);DOID:1561(cognitive_disorder);DOID:162(cancer);DOID:178(vascular_disease);DOID:2468(ps…	R-HSA-380073(Liganded Gi-activating GPCR acts as a GEF for Gi);R-HSA-418904(A1 and A3 receptors bind adenosine);R-HSA-749454(The Ligand:GPCR:Gi complex dissociates);R-HSA-749456(Liganded Gi-activating GPCRs bind inactive heterotrimeric G-protein Gi)	10.9328	1.3308	8.21522	3.0383	4.94293e-40	2.03585e-37	up	yes
ENSG00000275216	ENSG00000275216		ENST00000618966	NA	NA	NA	NA	NA	novel transcript	lncRNA	NA	NA	4.33495	33.3273	0.130072	-2.94262	2.48958e-39	9.93344e-37	down	yes
ENSG00000235897	TM4SF19-AS1	100874214	ENST00000420226;ENST00000452051	NA	NA	NA	NA	NA	TM4SF19 antisense RNA 1 [Source:HGNC Symbol;Acc:HGNC:41085]	lncRNA	NA	NA	1.79295	15.759	0.113773	-3.13577	4.88825e-39	1.89131e-36	down	yes
ENSG00000107731	UNC5B	219699	ENST00000335350;ENST00000373192	GO:0001525(angiogenesis);GO:0005042(netrin receptor activity);GO:0005515(protein binding);GO:0005886(plasma membrane);GO:0006915(apoptotic process);GO:0007165(signal transduction);GO:0007411(axon guidance);GO:0014068(positive regulation of phosphatidylinositol 3-kinase signaling);GO:0016020(membrane);GO:0016021(integral component of membrane);GO:0033564(anterior/posterior axon guidance);GO:003800…	04360(Axon guidance);04360(Axon guidance)	NA	NA	NA	unc-5 netrin receptor B [Source:HGNC Symbol;Acc:HGNC:12568]	protein_coding	DOID:0050686(organ_system_cancer);DOID:0080001(bone_disease);DOID:14566(disease_of_cellular_proliferation);DOID:162(cancer);DOID:17(musculoskeletal_system_disease);DOID:3119(gastrointestinal_system_cancer);DOID:3342(bone_inflammation_disease);DOID:3571(liver_cancer);DOID:4(disease);DOID:684(hepatocellular_carcinoma);DOID:686(liver_carcinoma);DOID:7148(rheumatoid_arthritis);DOID:7(disease_of_anato…	R-HSA-373713(DCC heterodimerizes with UNC-5:Netrin-1);R-HSA-373751(UNC-5 binds Netrin-1);R-HSA-418849(DAPK binds UNC5B);R-HSA-418852(Caspase cleavage of UNC5B);R-HSA-622357(PIKE-L interaction with UNC5B)	0.172024	1.9613	0.0877094	-3.51113	8.28355e-39	3.11072e-36	down	yes
ENSG00000123416	TUBA1B	10376	ENST00000332858;ENST00000336023;ENST00000547765;ENST00000547476;ENST00000551324	GO:0000166(nucleotide binding);GO:0000226(microtubule cytoskeleton organization);GO:0000278(mitotic cell cycle);GO:0003725(double-stranded RNA binding);GO:0005198(structural molecule activity);GO:0005200(structural constituent of cytoskeleton);GO:0005515(protein binding);GO:0005525(GTP binding);GO:0005737(cytoplasm);GO:0005856(cytoskeleton);GO:0005874(microtubule);GO:0005881(cytoplasmic microtubu…	04145(Phagosome);04210(Apoptosis);04530(Tight junction);04540(Gap junction);05010(Alzheimer disease);05012(Parkinson disease);05014(Amyotrophic lateral sclerosis);05016(Huntington disease);05020(Prion disease);05022(Pathways of neurodegeneration - multiple diseases);05130(Pathogenic Escherichia coli infection);05132(Salmonella infection);05132(Salmonella infection)	NA	NA	NA	tubulin alpha 1b [Source:HGNC Symbol;Acc:HGNC:18809]	retained_intron;protein_coding;nonsense_mediated_decay	DOID:10579(leukodystrophy);DOID:12217(Lewy_body_dementia);DOID:1443(cerebral_degeneration);DOID:14566(disease_of_cellular_proliferation);DOID:150(disease_of_mental_health);DOID:1561(cognitive_disorder);DOID:162(cancer);DOID:2468(psychotic_disorder);DOID:331(central_nervous_system_disease);DOID:4(disease);DOID:5419(schizophrenia);DOID:7(disease_of_anatomical_entity);DOID:863(nervous_system_disease…	R-HSA-1638803(Phosphorylation of cohesin by PLK1 at centromeres);R-HSA-1638821(PP2A-B56 dephosphorylates centromeric cohesin);R-HSA-190520(Association of Golgi transport vesicles with microtubules);R-HSA-190877(Insertion of connexons into the plasma membrane resulting in the formation of hemi-channels);R-HSA-191737(Docking of connexons into junctional, double-membrane spanning channels);R-HSA-221…	1051.42	149.255	7.04445	2.81649	9.08164e-39	3.31298e-36	up	yes
ENSG00000146278	PNRC1	10957	ENST00000336032;ENST00000354922	GO:0005515(protein binding);GO:0005634(nucleus);GO:0005634(nucleus)	NA	NA	NA	NA	proline rich nuclear receptor coactivator 1 [Source:HGNC Symbol;Acc:HGNC:17278]	protein_coding	NA	NA	11.6214	86.7975	0.133891	-2.90087	1.27971e-38	4.53869e-36	down	yes
ENSG00000244165	P2RY11	5032,692312	ENST00000471843;ENST00000321826	GO:0004930(G protein-coupled receptor activity);GO:0005886(plasma membrane);GO:0005887(integral component of plasma membrane);GO:0006952(defense response);GO:0007165(signal transduction);GO:0007186(G protein-coupled receptor signaling pathway);GO:0007190(activation of adenylate cyclase activity);GO:0007200(phospholipase C-activating G protein-coupled receptor signaling pathway);GO:0016020(membran…	04080(Neuroactive ligand-receptor interaction);04080(Neuroactive ligand-receptor interaction)	NA	NA	NA	purinergic receptor P2Y11 [Source:HGNC Symbol;Acc:HGNC:8540]	processed_transcript;protein_coding	NA	R-HSA-379044(Liganded Gs-activating GPCR acts as a GEF for Gs);R-HSA-379048(Liganded Gq/11-activating GPCRs act as GEFs for Gq/11);R-HSA-417825(P2Y11 receptor can bind to ATP);R-HSA-744886(The Ligand:GPCR:Gs complex dissociates);R-HSA-744887(Liganded Gs-activating GPCRs bind inactive heterotrimeric Gs);R-HSA-749448(Liganded Gq-activating GPCRs bind inactive heterotrimeric Gq);R-HSA-749452(The Lig…	1.96086	16.6009	0.118118	-3.0817	2.64648e-38	8.9973e-36	down	yes
ENSG00000164463	CREBRF	153222	ENST00000296953;ENST00000523161;ENST00000520420;ENST00000517882	GO:0000122(negative regulation of transcription by RNA polymerase II);GO:0000977(RNA polymerase II transcription regulatory region sequence-specific DNA binding);GO:0000981(DNA-binding transcription factor activity, RNA polymerase II-specific);GO:0001228(DNA-binding transcription activator activity, RNA polymerase II-specific);GO:0003700(DNA-binding transcription factor activity);GO:0005515(prote…	NA	NA	NA	Others	CREB3 regulatory factor [Source:HGNC Symbol;Acc:HGNC:24050]	protein_coding;processed_transcript	NA	R-HSA-8874849(CREBRF binds CREB3)	0.105162	1.14517	0.0918304	-3.44488	2.67777e-38	8.9973e-36	down	yes
ENSG00000113368	LMNB1	4001	ENST00000261366;ENST00000504788;ENST00000494185;ENST00000472034;ENST00000395354;ENST00000460265	GO:0003690(double-stranded DNA binding);GO:0005198(structural molecule activity);GO:0005515(protein binding);GO:0005634(nucleus);GO:0005635(nuclear envelope);GO:0005637(nuclear inner membrane);GO:0005638(lamin filament);GO:0005652(nuclear lamina);GO:0005654(nucleoplasm);GO:0005882(intermediate filament);GO:0006998(nuclear envelope organization);GO:0016020(membrane);GO:0016363(nuclear matrix);GO:0…	04210(Apoptosis);04210(Apoptosis)	NA	NA	NA	lamin B1 [Source:HGNC Symbol;Acc:HGNC:6637]	protein_coding;processed_transcript;retained_intron;nonsense_mediated_decay	DOID:0050117(disease_by_infectious_agent);DOID:0050686(organ_system_cancer);DOID:10579(leukodystrophy);DOID:1443(cerebral_degeneration);DOID:14566(disease_of_cellular_proliferation);DOID:162(cancer);DOID:3119(gastrointestinal_system_cancer);DOID:331(central_nervous_system_disease);DOID:3571(liver_cancer);DOID:4(disease);DOID:684(hepatocellular_carcinoma);DOID:686(liver_carcinoma);DOID:7(disease_o…	R-HSA-264871(Caspase-mediated cleavage of Lamin B1);R-HSA-2993898(VRK1/VRK2 phosphorylate BANF1);R-HSA-2995376(BANF1 binds chromatin, EMD/TMPO/LEMD3/LEMD2 and lamins);R-HSA-4647594(SAHF formation);R-HSA-5229194(Depolymerization of lamin filaments after PKC-mediated phosphorylation);R-HSA-5244669(CDK1 phosphorylates lamins and facilitates depolymerization of lamin filaments);R-HSA-8868340(CDK5:p25…	35.6271	5.04209	7.06594	2.82088	4.60392e-38	1.50725e-35	up	yes
ENSG00000234648	ENSG00000234648		ENST00000448875	NA	NA	NA	NA	NA	pseudogene similar to part of ribosomal protein L3 (RPL3)	processed_pseudogene	NA	NA	540.137	74.3318	7.26657	2.86127	5.54443e-38	1.76978e-35	up	yes
ENSG00000289720	ENSG00000289720		ENST00000696980;ENST00000696978;ENST00000696979	GO:0004842(ubiquitin-protein transferase activity);GO:0016567(protein ubiquitination);GO:0016567(protein ubiquitination)	NA	NA	NA	NA	novel protein	nonsense_mediated_decay	NA	NA	2.28213	17.7406	0.128638	-2.95861	6.98117e-38	2.17404e-35	down	yes
ENSG00000145337	PYURF	100996939	ENST00000273968	GO:0005739(mitochondrion);GO:0005789(endoplasmic reticulum membrane)	NA	NA	NA	NA	PIGY upstream open reading frame [Source:HGNC Symbol;Acc:HGNC:44317]	protein_coding	NA	NA	14.7855	1.70955	8.64877	3.11249	2.0272e-37	6.16269e-35	up	yes
ENSG00000129226	CD68	968	ENST00000250092;ENST00000380498;ENST00000584180;ENST00000584502	GO:0002437(inflammatory response to antigenic stimulus);GO:0002605(negative regulation of dendritic cell antigen processing and presentation);GO:0005515(protein binding);GO:0005737(cytoplasm);GO:0005764(lysosome);GO:0005765(lysosomal membrane);GO:0005768(endosome);GO:0005886(plasma membrane);GO:0007568(aging);GO:0010008(endosome membrane);GO:0016020(membrane);GO:0016021(integral component of memb…	04142(Lysosome);04142(Lysosome)	NA	NA	NA	CD68 molecule [Source:HGNC Symbol;Acc:HGNC:1693]	protein_coding	DOID:0050686(organ_system_cancer);DOID:0060100(musculoskeletal_system_cancer);DOID:14566(disease_of_cellular_proliferation);DOID:162(cancer);DOID:1967(leiomyosarcoma);DOID:4045(muscle_cancer);DOID:4230(smooth_muscle_cancer);DOID:4(disease)	R-HSA-6798739(Exocytosis of azurophil granule membrane proteins)	6.12296	45.6196	0.134218	-2.89735	2.8911e-37	8.58455e-35	down	yes
ENSG00000087074	PPP1R15A	23645	ENST00000200453;ENST00000600406	GO:0000164(protein phosphatase type 1 complex);GO:0005515(protein binding);GO:0005737(cytoplasm);GO:0005739(mitochondrion);GO:0005741(mitochondrial outer membrane);GO:0005783(endoplasmic reticulum);GO:0005789(endoplasmic reticulum membrane);GO:0005794(Golgi apparatus);GO:0005829(cytosol);GO:0006417(regulation of translation);GO:0006915(apoptotic process);GO:0006974(cellular response to DNA damage…	04141(Protein processing in endoplasmic reticulum);04141(Protein processing in endoplasmic reticulum)	NA	NA	NA	protein phosphatase 1 regulatory subunit 15A [Source:HGNC Symbol;Acc:HGNC:14375]	protein_coding	DOID:0050161(lower_respiratory_tract_disease);DOID:0050177(monogenic_disease);DOID:0050687(cell_type_cancer);DOID:0050736(autosomal_dominant_disease);DOID:0050739(autosomal_genetic_disease);DOID:1176(bronchial_disease);DOID:13515(tuberous_sclerosis);DOID:14566(disease_of_cellular_proliferation);DOID:1579(respiratory_system_disease);DOID:162(cancer);DOID:1909(melanoma);DOID:2320(obstructive_lung_d…	R-HSA-178178(PP1 dephosphorylates TGFBR1);R-HSA-178189(SMAD7 recruits GADD34:PP1 to phosphorylated TGFBR);R-HSA-9650710(Translation of PPP1R15A);R-NUL-2167872(PP1CC dephosphorylates TGFBR1);R-NUL-2167890(Smad7 recruits GADD34:PP1CC to phosphorylated TGF-beta receptor complex)	30.2757	213.689	0.141681	-2.81928	4.94737e-37	1.43564e-34	down	yes
ENSG00000167900	TK1	7083	ENST00000301634;ENST00000588734;ENST00000590430;ENST00000590862;ENST00000592126;ENST00000586613	GO:0000166(nucleotide binding);GO:0004797(thymidine kinase activity);GO:0005515(protein binding);GO:0005524(ATP binding);GO:0005737(cytoplasm);GO:0005829(cytosol);GO:0006139(nucleobase-containing compound metabolic process);GO:0008270(zinc ion binding);GO:0009157(deoxyribonucleoside monophosphate biosynthetic process);GO:0016301(kinase activity);GO:0016310(phosphorylation);GO:0016740(transferase …	00240(Pyrimidine metabolism);00983(Drug metabolism - other enzymes);01100(Metabolic pathways);01100(Metabolic pathways)	K00857	EC:2.7.1.21	NA	thymidine kinase 1 [Source:HGNC Symbol;Acc:HGNC:11830]	protein_coding;retained_intron	DOID:0050615(respiratory_system_cancer);DOID:0050686(organ_system_cancer);DOID:120(female_reproductive_organ_cancer);DOID:1324(lung_cancer);DOID:14566(disease_of_cellular_proliferation);DOID:162(cancer);DOID:193(reproductive_organ_cancer);DOID:2151(malignant_ovarian_surface_epithelial_stromal_neoplasm);DOID:2152(ovary_epithelial_cancer);DOID:2394(ovarian_cancer);DOID:263(kidney_cancer);DOID:3905(…	R-HSA-73632(thymidine + ATP => TMP (deoxythymidine 5'-monophosphate) + ADP [TK1]);R-HSA-8962039(TK1 gene expression is stimulated by E2F1)	252.728	37.8008	6.68578	2.7411	7.06508e-37	2.0046e-34	up	yes
ENSG00000260238	PMF1-BGLAP	100527963	ENST00000490491;ENST00000368276;ENST00000567140	GO:0000775(chromosome, centromeric region);GO:0000776(kinetochore);GO:0000818(nuclear MIS12/MIND complex);GO:0005634(nucleus);GO:0005654(nucleoplasm);GO:0005694(chromosome);GO:0005794(Golgi apparatus);GO:0007049(cell cycle);GO:0043231(intracellular membrane-bounded organelle);GO:0051301(cell division);GO:0051301(cell division)	NA	NA	NA	NA	PMF1-BGLAP readthrough [Source:HGNC Symbol;Acc:HGNC:42953]	protein_coding	NA	R-HSA-141409(Mad1 binds kinetochore);R-HSA-141422(MAD2 converted to an inhibitory state via interaction with Mad1);R-HSA-141431(MAD2 associates with the Mad1 kinetochore complex);R-HSA-141439(Release of activated MAD2 from kinetochores);R-HSA-1638803(Phosphorylation of cohesin by PLK1 at centromeres);R-HSA-1638821(PP2A-B56 dephosphorylates centromeric cohesin);R-HSA-2467809(ESPL1 (Separase) cleav…	21.2523	2.55824	8.30736	3.05439	1.03494e-36	2.87263e-34	up	yes
ENSG00000145040	UCN2	90226,10911	ENST00000273610	GO:0001664(G protein-coupled receptor binding);GO:0005179(hormone activity);GO:0005576(extracellular region);GO:0005615(extracellular space);GO:0007189(adenylate cyclase-activating G protein-coupled receptor signaling pathway);GO:0007586(digestion);GO:0009755(hormone-mediated signaling pathway);GO:0031669(cellular response to nutrient levels);GO:0042562(hormone binding);GO:0051429(corticotropin-r…	04080(Neuroactive ligand-receptor interaction)	NA	NA	NA	urocortin 2 [Source:HGNC Symbol;Acc:HGNC:18414]	protein_coding	NA	R-HSA-8937631(CRHR2-2 binds CRH,UCN,UCN2,UCN3)	1.22255	11.5284	0.106046	-3.23723	1.19291e-36	3.24066e-34	down	yes
ENSG00000255508	ENSG00000255508		ENST00000496634;ENST00000526409;ENST00000534745	GO:0003676(nucleic acid binding);GO:0003723(RNA binding);GO:0004652(polynucleotide adenylyltransferase activity);GO:0016740(transferase activity);GO:0016779(nucleotidyltransferase activity);GO:0043231(intracellular membrane-bounded organelle);GO:0043231(intracellular membrane-bounded organelle)	NA	NA	NA	NA	novel protein	nonsense_mediated_decay;retained_intron	NA	NA	58.4406	8.78568	6.6518	2.73375	1.34961e-36	3.58996e-34	up	yes
ENSG00000140105	WARS1	7453	ENST00000344102;ENST00000392882;ENST00000355338;ENST00000358655;ENST00000557135;ENST00000553934;ENST00000556579;ENST00000554950;ENST00000557347;ENST00000557722;ENST00000556435;ENST00000556338;ENST00000554601;ENST00000553769;ENST00000557614;ENST00000556295;ENST00000555063;ENST00000554331;ENST00000554084;ENST00000557094;ENST00000553808;ENST00000556504;ENST00000555031;ENST00000555410;ENST00000553395…	GO:0000166(nucleotide binding);GO:0001525(angiogenesis);GO:0001933(negative regulation of protein phosphorylation);GO:0004812(aminoacyl-tRNA ligase activity);GO:0004830(tryptophan-tRNA ligase activity);GO:0005515(protein binding);GO:0005524(ATP binding);GO:0005634(nucleus);GO:0005737(cytoplasm);GO:0005829(cytosol);GO:0006412(translation);GO:0006418(tRNA aminoacylation for protein translation);GO:…	00970(Aminoacyl-tRNA biosynthesis);00970(Aminoacyl-tRNA biosynthesis)	K01867	EC:6.1.1.2	NA	tryptophanyl-tRNA synthetase 1 [Source:HGNC Symbol;Acc:HGNC:12729]	protein_coding;retained_intron;nonsense_mediated_decay;processed_transcript	DOID:14566(disease_of_cellular_proliferation);DOID:162(cancer);DOID:4(disease)	R-HSA-379977(tryptophan + tRNA(Trp) + ATP => Trp-tRNA(Trp) + AMP + pyrophosphate)	22.6342	156.674	0.144466	-2.79119	1.98535e-36	5.14304e-34	down	yes
ENSG00000140451	PIF1	80119	ENST00000559239;ENST00000559522;ENST00000558380;ENST00000559872;ENST00000558547;ENST00000560504;ENST00000560444;ENST00000268043	GO:0000002(mitochondrial genome maintenance);GO:0000166(nucleotide binding);GO:0000287(magnesium ion binding);GO:0000723(telomere maintenance);GO:0000781(chromosome, telomeric region);GO:0003677(DNA binding);GO:0003678(DNA helicase activity);GO:0004386(helicase activity);GO:0005524(ATP binding);GO:0005634(nucleus);GO:0005654(nucleoplasm);GO:0005657(replication fork);GO:0005739(mitochondrion);GO:0…	NA	K15255	EC:3.6.4.12	NA	PIF1 5'-to-3' DNA helicase [Source:HGNC Symbol;Acc:HGNC:26220]	protein_coding;retained_intron	NA	R-HSA-163120(Disassociation of Telomerase RNP and the Chromosome End)	5.3148	0.665128	7.99065	2.99831	2.01404e-36	5.14304e-34	up	yes
ENSG00000152253	SPC25	57405	ENST00000282074;ENST00000472216	GO:0000775(chromosome, centromeric region);GO:0000776(kinetochore);GO:0005515(protein binding);GO:0005634(nucleus);GO:0005694(chromosome);GO:0005829(cytosol);GO:0007049(cell cycle);GO:0007052(mitotic spindle organization);GO:0007059(chromosome segregation);GO:0007094(mitotic spindle assembly checkpoint signaling);GO:0008608(attachment of spindle microtubules to kinetochore);GO:0031262(Ndc80 compl…	NA	NA	NA	NA	SPC25 component of NDC80 kinetochore complex [Source:HGNC Symbol;Acc:HGNC:24031]	protein_coding;processed_transcript	NA	R-HSA-141409(Mad1 binds kinetochore);R-HSA-141422(MAD2 converted to an inhibitory state via interaction with Mad1);R-HSA-141431(MAD2 associates with the Mad1 kinetochore complex);R-HSA-141439(Release of activated MAD2 from kinetochores);R-HSA-1638803(Phosphorylation of cohesin by PLK1 at centromeres);R-HSA-1638821(PP2A-B56 dephosphorylates centromeric cohesin);R-HSA-2467809(ESPL1 (Separase) cleav…	20.749	2.93836	7.06141	2.81996	3.78101e-35	9.46588e-33	up	yes
ENSG00000196517	SLC6A9	6536	ENST00000372310;ENST00000492434;ENST00000372307;ENST00000360584;ENST00000372306;ENST00000489764;ENST00000466926	GO:0003333(amino acid transmembrane transport);GO:0005283(amino acid:sodium symporter activity);GO:0005768(endosome);GO:0005886(plasma membrane);GO:0005887(integral component of plasma membrane);GO:0006836(neurotransmitter transport);GO:0006865(amino acid transport);GO:0009925(basal plasma membrane);GO:0014069(postsynaptic density);GO:0015187(glycine transmembrane transporter activity);GO:0015293…	04721(Synaptic vesicle cycle);04721(Synaptic vesicle cycle)	NA	NA	NA	solute carrier family 6 member 9 [Source:HGNC Symbol;Acc:HGNC:11056]	protein_coding;processed_transcript;retained_intron	DOID:0050828(artery_disease);DOID:10763(hypertension);DOID:10825(essential_hypertension);DOID:1287(cardiovascular_system_disease);DOID:150(disease_of_mental_health);DOID:1561(cognitive_disorder);DOID:178(vascular_disease);DOID:2468(psychotic_disorder);DOID:303(substance_related_disorder);DOID:4(disease);DOID:5419(schizophrenia);DOID:7(disease_of_anatomical_entity);DOID:9973(substance_dependence)	R-HSA-444120(SLC6A5,9 cotransport Gly, Cl-, Na+ from extracellular region to cytosol)	1.16702	8.56277	0.13629	-2.87525	5.27836e-35	1.29604e-32	down	yes
ENSG00000243753	HLA-L	3139	ENST00000686490;ENST00000701167;ENST00000702345;ENST00000463348;ENST00000702262;ENST00000691908;ENST00000692540;ENST00000687061	NA	NA	NA	NA	NA	major histocompatibility complex, class I, L (pseudogene) [Source:HGNC Symbol;Acc:HGNC:4970]	processed_transcript	NA	NA	0.156427	1.60769	0.0972994	-3.36142	2.55219e-34	6.14836e-32	down	yes
ENSG00000111665	CDCA3	83461	ENST00000540683;ENST00000535406;ENST00000538862;ENST00000536241;ENST00000544610;ENST00000535871;ENST00000604599;ENST00000545368;ENST00000603043;ENST00000446553;ENST00000422785;ENST00000229265	GO:0005515(protein binding);GO:0005737(cytoplasm);GO:0005829(cytosol);GO:0005912(adherens junction);GO:0007049(cell cycle);GO:0008150(biological_process);GO:0016567(protein ubiquitination);GO:0051301(cell division);GO:0051301(cell division)	NA	NA	NA	NA	cell division cycle associated 3 [Source:HGNC Symbol;Acc:HGNC:14624]	protein_coding;retained_intron;processed_transcript	NA	NA	27.377	4.36066	6.27817	2.65034	2.61364e-34	6.1798e-32	up	yes
ENSG00000167994	RAB3IL1	5866	ENST00000394836;ENST00000301773;ENST00000533136	GO:0005085(guanyl-nucleotide exchange factor activity);GO:0005515(protein binding);GO:0005829(cytosol);GO:0006887(exocytosis);GO:0015031(protein transport);GO:0042802(identical protein binding);GO:0050790(regulation of catalytic activity);GO:0070319(Golgi to plasma membrane transport vesicle);GO:0070319(Golgi to plasma membrane transport vesicle)	NA	NA	NA	NA	RAB3A interacting protein like 1 [Source:HGNC Symbol;Acc:HGNC:9780]	protein_coding;retained_intron	NA	R-HSA-8875318(RAB3 GEFs exchange GTP for GDP on RAB3A);R-HSA-8876190(RAB8 GEFs exchange GTP for GDP on RAB8)	1.61911	11.6639	0.138815	-2.84877	5.84309e-34	1.35645e-31	down	yes
ENSG00000076003	MCM6	4175	ENST00000264156;ENST00000483902	GO:0000166(nucleotide binding);GO:0000727(double-strand break repair via break-induced replication);GO:0000781(chromosome, telomeric region);GO:0003677(DNA binding);GO:0003678(DNA helicase activity);GO:0003697(single-stranded DNA binding);GO:0004386(helicase activity);GO:0005515(protein binding);GO:0005524(ATP binding);GO:0005634(nucleus);GO:0005654(nucleoplasm);GO:0005694(chromosome);GO:0006259(…	03030(DNA replication);04110(Cell cycle);04110(Cell cycle)	K02542	EC:3.6.4.12	NA	minichromosome maintenance complex component 6 [Source:HGNC Symbol;Acc:HGNC:6949]	protein_coding;retained_intron	DOID:0050687(cell_type_cancer);DOID:14566(disease_of_cellular_proliferation);DOID:162(cancer);DOID:305(carcinoma);DOID:4(disease)	R-HSA-169468(MCM2-7 mediated fork unwinding);R-HSA-176298(Activation of claspin);R-HSA-176318(Loading of claspin onto DNA during replication origin firing);R-HSA-176942(Multiple proteins are localized at replication fork);R-HSA-68914(DNA polymerase alpha:primase binds at the origin);R-HSA-68916(DNA Replication Factor A (RPA) associates with the pre-replicative complex at the origin);R-HSA-68917(C…	17.6521	2.75778	6.40084	2.67826	7.68687e-34	1.75261e-31	up	yes
ENSG00000165312	OTUD1	220213	ENST00000376495	GO:0004843(cysteine-type deubiquitinase activity);GO:0006508(proteolysis);GO:0008233(peptidase activity);GO:0008234(cysteine-type peptidase activity);GO:0016579(protein deubiquitination);GO:0016787(hydrolase activity);GO:0070536(protein K63-linked deubiquitination)	NA	K13716	EC:3.4.19.12	NA	OTU deubiquitinase 1 [Source:HGNC Symbol;Acc:HGNC:27346]	protein_coding	NA	NA	0.439679	3.99568	0.110039	-3.18392	8.44716e-34	1.89216e-31	down	yes
ENSG00000176890	TYMS	7298	ENST00000323274;ENST00000323224;ENST00000323250;ENST00000579128	GO:0000900(mRNA regulatory element binding translation repressor activity);GO:0003729(mRNA binding);GO:0003824(catalytic activity);GO:0004799(thymidylate synthase activity);GO:0005542(folic acid binding);GO:0005634(nucleus);GO:0005730(nucleolus);GO:0005737(cytoplasm);GO:0005739(mitochondrion);GO:0005743(mitochondrial inner membrane);GO:0005759(mitochondrial matrix);GO:0005829(cytosol);GO:0006206(…	00240(Pyrimidine metabolism);00670(One carbon pool by folate);01100(Metabolic pathways);01523(Antifolate resistance);01523(Antifolate resistance)	K00560	EC:2.1.1.45	NA	thymidylate synthetase [Source:HGNC Symbol;Acc:HGNC:12441]	protein_coding;retained_intron	DOID:0050155(sensory_system_disease);DOID:0050686(organ_system_cancer);DOID:0050687(cell_type_cancer);DOID:0060083(immune_system_cancer);DOID:0060116(sensory_system_cancer);DOID:0080001(bone_disease);DOID:10155(intestinal_cancer);DOID:1037(lymphoblastic_leukemia);DOID:10534(stomach_cancer);DOID:120(female_reproductive_organ_cancer);DOID:1240(leukemia);DOID:14566(disease_of_cellular_proliferation)…	R-HSA-73605(dUMP + N5,N10-methylene tetrahydrofolate => TMP + dihydrofolate);R-HSA-8962050(TYMS gene expression)	133.94	22.461	5.96322	2.57609	3.6116e-33	7.9505e-31	up	yes
ENSG00000156804	FBXO32	114907	ENST00000517956;ENST00000520511;ENST00000287396;ENST00000524000	GO:0005515(protein binding);GO:0005634(nucleus);GO:0005654(nucleoplasm);GO:0005737(cytoplasm);GO:0005829(cytosol);GO:0014894(response to denervation involved in regulation of muscle adaptation);GO:0016567(protein ubiquitination);GO:0019005(SCF ubiquitin ligase complex);GO:0030018(Z disc);GO:0071549(cellular response to dexamethasone stimulus);GO:0071549(cellular response to dexamethasone stimulus)	04068(FoxO signaling pathway);04068(FoxO signaling pathway)	NA	NA	NA	F-box protein 32 [Source:HGNC Symbol;Acc:HGNC:16731]	protein_coding;retained_intron	NA	R-HSA-8952618(AcM-UBE2M transfers NEDD8 to CRL1 E3 ubiquitin ligase complex);R-HSA-8952620(NEDD8:AcM-UBE2M binds CRL1 E3 ubiquitin ligase complex);R-HSA-8955241(CAND1 binds cytosolic CRL E3 ubiquitin ligases);R-HSA-8955289(COMMDs displace CAND1 from cytosolic CRL E3 ubiquitin ligase complexes);R-HSA-8956040(COP9 signalosome deneddylates cytosolic CRL E3 ubiquitin ligase complexes);R-HSA-8956200(M…	0.329416	2.56255	0.12855	-2.9596	1.32043e-32	2.85749e-30	down	yes
ENSG00000171848	RRM2	6241	ENST00000304567;ENST00000615152;ENST00000360566;ENST00000652660;ENST00000461327;ENST00000646978;ENST00000641498;ENST00000498343;ENST00000459969;ENST00000462343;ENST00000491447;ENST00000487591;ENST00000381786;ENST00000485717;ENST00000607140;ENST00000642996	GO:0001824(blastocyst development);GO:0004748(ribonucleoside-diphosphate reductase activity, thioredoxin disulfide as acceptor);GO:0005515(protein binding);GO:0005634(nucleus);GO:0005737(cytoplasm);GO:0005829(cytosol);GO:0005971(ribonucleoside-diphosphate reductase complex);GO:0006260(DNA replication);GO:0008199(ferric iron binding);GO:0009185(ribonucleoside diphosphate metabolic process);GO:0009…	00230(Purine metabolism);00240(Pyrimidine metabolism);00480(Glutathione metabolism);00983(Drug metabolism - other enzymes);01100(Metabolic pathways);04115(p53 signaling pathway);04115(p53 signaling pathway)	K10808	EC:1.17.4.1	NA	ribonucleotide reductase regulatory subunit M2 [Source:HGNC Symbol;Acc:HGNC:10452]	protein_coding;retained_intron;nonsense_mediated_decay;processed_transcript	DOID:0050615(respiratory_system_cancer);DOID:0050686(organ_system_cancer);DOID:0050687(cell_type_cancer);DOID:1324(lung_cancer);DOID:14566(disease_of_cellular_proliferation);DOID:162(cancer);DOID:170(endocrine_gland_cancer);DOID:1793(pancreatic_cancer);DOID:2994(germ_cell_cancer);DOID:3905(lung_carcinoma);DOID:3908(non_small_cell_lung_carcinoma);DOID:3910(lung_adenocarcinoma);DOID:4074(pancreas_a…	R-HSA-111742(RNR (M1M2) reduces nucleotide diphosphates to deoxynucleotide diphosphates (glutaredoxin));R-HSA-111751(RNR (M1M2) reduces nucleotide diphosphates to deoxynucleotide diphosphates (thioredoxin));R-HSA-8961982(RRM2 gene expression is stimulated by E2F1 and inhibited by E2F6)	37.2171	6.43222	5.78604	2.53258	3.37191e-32	7.17542e-30	up	yes
ENSG00000163393	SLC22A15	55356	ENST00000369503;ENST00000369502;ENST00000481127	GO:0003674(molecular_function);GO:0005575(cellular_component);GO:0006811(ion transport);GO:0008150(biological_process);GO:0016020(membrane);GO:0016021(integral component of membrane);GO:0022857(transmembrane transporter activity);GO:0055085(transmembrane transport);GO:0055085(transmembrane transport)	NA	NA	NA	NA	solute carrier family 22 member 15 [Source:HGNC Symbol;Acc:HGNC:20301]	protein_coding;processed_transcript	NA	R-HSA-549297(SLC22A4, 5,15,16 cotransport CAR, Na+ from extracellular region to cytosol)	0.37175	2.94178	0.126369	-2.98429	5.8783e-32	1.2304e-29	down	yes
ENSG00000144063	MALL	7851	ENST00000272462;ENST00000427178	GO:0000139(Golgi membrane);GO:0005515(protein binding);GO:0005886(plasma membrane);GO:0016020(membrane);GO:0016021(integral component of membrane);GO:0019911(structural constituent of myelin sheath);GO:0030136(clathrin-coated vesicle);GO:0031410(cytoplasmic vesicle);GO:0042552(myelination);GO:0042632(cholesterol homeostasis);GO:0045121(membrane raft);GO:0110165(cellular anatomical entity);GO:0110…	NA	NA	NA	NA	mal, T cell differentiation protein like [Source:HGNC Symbol;Acc:HGNC:6818]	protein_coding	DOID:0060072(benign_neoplasm);DOID:0060084(cell_type_benign_neoplasm);DOID:14566(disease_of_cellular_proliferation);DOID:4(disease);DOID:657(adenoma)	NA	19.0719	3.11854	6.11564	2.6125	7.73234e-32	1.59236e-29	up	yes
ENSG00000162772	ATF3	467	ENST00000341491;ENST00000465155;ENST00000492118;ENST00000464547;ENST00000366983;ENST00000613104	GO:0000122(negative regulation of transcription by RNA polymerase II);GO:0000785(chromatin);GO:0000976(transcription cis-regulatory region binding);GO:0000977(RNA polymerase II transcription regulatory region sequence-specific DNA binding);GO:0000978(RNA polymerase II cis-regulatory region sequence-specific DNA binding);GO:0000981(DNA-binding transcription factor activity, RNA polymerase II-speci…	NA	NA	NA	TF_bZIP	activating transcription factor 3 [Source:HGNC Symbol;Acc:HGNC:785]	protein_coding;retained_intron;processed_transcript;nonsense_mediated_decay	DOID:0014667(disease_of_metabolism);DOID:0050686(organ_system_cancer);DOID:0050687(cell_type_cancer);DOID:0060158(acquired_metabolic_disease);DOID:0080015(physical_disorder);DOID:10892(hypospadias);DOID:14566(disease_of_cellular_proliferation);DOID:162(cancer);DOID:1909(melanoma);DOID:2154(nephroblastoma);DOID:263(kidney_cancer);DOID:2994(germ_cell_cancer);DOID:374(nutrition_disease);DOID:3996(ur…	R-HSA-1791173(Expression of ATF3);R-HSA-9653893(ATF4, CEBPB, and ATF3 bind the CHAC1 promoter);R-HSA-9653894(Expression of CHAC1)	4.73558	28.7352	0.164801	-2.60121	1.32686e-31	2.68911e-29	down	yes
ENSG00000154146	NRGN	4900	ENST00000284292;ENST00000412681	GO:0005515(protein binding);GO:0005516(calmodulin binding);GO:0005547(phosphatidylinositol-3,4,5-trisphosphate binding);GO:0005634(nucleus);GO:0005737(cytoplasm);GO:0005829(cytosol);GO:0007165(signal transduction);GO:0007399(nervous system development);GO:0008306(associative learning);GO:0012510(trans-Golgi network transport vesicle membrane);GO:0014069(postsynaptic density);GO:0016301(kinase act…	NA	NA	NA	NA	neurogranin [Source:HGNC Symbol;Acc:HGNC:8000]	protein_coding	DOID:0060037(developmental_disorder_of_mental_health);DOID:0060038(specific_developmental_disorder);DOID:1059(intellectual_disability);DOID:150(disease_of_mental_health);DOID:1561(cognitive_disorder);DOID:2468(psychotic_disorder);DOID:4(disease);DOID:5419(schizophrenia)	R-HSA-9618785(Calmodulin binds neurogranin);R-HSA-9618811(Calcium binds calmodulin at the synapse)	10.1575	1.31593	7.71884	2.94838	1.40366e-31	2.8003e-29	up	yes
ENSG00000134222	PSRC1	84722	ENST00000369909;ENST00000369907;ENST00000369903;ENST00000429031;ENST00000459765;ENST00000418914;ENST00000369904;ENST00000409267;ENST00000471740;ENST00000474126;ENST00000409138;ENST00000492431	GO:0000922(spindle pole);GO:0001578(microtubule bundle formation);GO:0005515(protein binding);GO:0005654(nucleoplasm);GO:0005737(cytoplasm);GO:0005819(spindle);GO:0005829(cytosol);GO:0005856(cytoskeleton);GO:0005876(spindle microtubule);GO:0007049(cell cycle);GO:0007080(mitotic metaphase plate congression);GO:0008017(microtubule binding);GO:0015630(microtubule cytoskeleton);GO:0030308(negative re…	NA	NA	NA	NA	proline and serine rich coiled-coil 1 [Source:HGNC Symbol;Acc:HGNC:24472]	protein_coding;retained_intron	NA	NA	14.0626	2.2706	6.19333	2.63072	1.44922e-31	2.84672e-29	up	yes
ENSG00000168062	BATF2	116071	ENST00000301887;ENST00000527454;ENST00000534177	GO:0000785(chromatin);GO:0000978(RNA polymerase II cis-regulatory region sequence-specific DNA binding);GO:0000981(DNA-binding transcription factor activity, RNA polymerase II-specific);GO:0003677(DNA binding);GO:0003700(DNA-binding transcription factor activity);GO:0005515(protein binding);GO:0005634(nucleus);GO:0006355(regulation of DNA-templated transcription);GO:0006357(regulation of transcri…	05235(PD-L1 expression and PD-1 checkpoint pathway in cancer);05235(PD-L1 expression and PD-1 checkpoint pathway in cancer)	NA	NA	TF_bZIP	basic leucine zipper ATF-like transcription factor 2 [Source:HGNC Symbol;Acc:HGNC:25163]	protein_coding;retained_intron	NA	NA	5.44833	32.972	0.165241	-2.59736	2.4669e-31	4.77233e-29	down	yes
ENSG00000112984	KIF20A	10112	ENST00000394894;ENST00000502338;ENST00000503417;ENST00000511638	GO:0000166(nucleotide binding);GO:0000281(mitotic cytokinesis);GO:0001578(microtubule bundle formation);GO:0003777(microtubule motor activity);GO:0005515(protein binding);GO:0005524(ATP binding);GO:0005634(nucleus);GO:0005654(nucleoplasm);GO:0005737(cytoplasm);GO:0005794(Golgi apparatus);GO:0005819(spindle);GO:0005856(cytoskeleton);GO:0005871(kinesin complex);GO:0005874(microtubule);GO:0007018(mi…	NA	NA	NA	NA	kinesin family member 20A [Source:HGNC Symbol;Acc:HGNC:9787]	protein_coding;nonsense_mediated_decay;retained_intron	DOID:0050686(organ_system_cancer);DOID:10595(Charcot_Marie_Tooth_disease);DOID:14566(disease_of_cellular_proliferation);DOID:162(cancer);DOID:170(endocrine_gland_cancer);DOID:1793(pancreatic_cancer);DOID:440(neuromuscular_disease);DOID:4(disease);DOID:7(disease_of_anatomical_entity);DOID:863(nervous_system_disease);DOID:870(neuropathy)	R-HSA-156723(Regulation of KIF20A (MKL2) by phosphorylation);R-HSA-2213248(Transport of antigen loaded MHC II molecules to surface);R-HSA-6811423(Retrograde vesicle is tethered at the ER by the NRZ complex and t-SNAREs);R-HSA-6811426(Retrograde COPI vesicles bind kinesin and microtubules);R-HSA-983259(Kinesins move along microtubules consuming ATP);R-HSA-983266(Kinesins bind microtubules);R-HSA-9…	52.9468	9.50689	5.5693	2.4775	6.2806e-31	1.19688e-28	up	yes
ENSG00000183688	RFLNB	359845	ENST00000329099	GO:0001837(epithelial to mesenchymal transition);GO:0005737(cytoplasm);GO:0005856(cytoskeleton);GO:0015629(actin cytoskeleton);GO:0030036(actin cytoskeleton organization);GO:0031005(filamin binding);GO:0032432(actin filament bundle);GO:0048705(skeletal system morphogenesis);GO:0061181(regulation of chondrocyte development);GO:0061182(negative regulation of chondrocyte development);GO:0061572(acti…	NA	NA	NA	NA	refilin B [Source:HGNC Symbol;Acc:HGNC:28705]	protein_coding	NA	NA	12.3599	2.08204	5.93645	2.5696	8.35457e-31	1.56188e-28	up	yes
ENSG00000101003	GINS1	9837	ENST00000262460;ENST00000696870;ENST00000696813;ENST00000696803;ENST00000696875;ENST00000696807;ENST00000696793;ENST00000696806;ENST00000484893;ENST00000696878;ENST00000473460;ENST00000696804;ENST00000696798;ENST00000696814;ENST00000696896;ENST00000696808	GO:0000811(GINS complex);GO:0001833(inner cell mass cell proliferation);GO:0005634(nucleus);GO:0005654(nucleoplasm);GO:0005694(chromosome);GO:0005737(cytoplasm);GO:0006260(DNA replication);GO:0006268(DNA unwinding involved in DNA replication);GO:0071162(CMG complex);GO:1900264(positive regulation of DNA-directed DNA polymerase activity);GO:1902983(DNA strand elongation involved in mitotic DNA rep…	NA	NA	NA	NA	GINS complex subunit 1 [Source:HGNC Symbol;Acc:HGNC:28980]	protein_coding;nonsense_mediated_decay;retained_intron;processed_transcript	DOID:14566(disease_of_cellular_proliferation);DOID:162(cancer);DOID:4(disease)	R-HSA-176942(Multiple proteins are localized at replication fork);R-HSA-176956(Formation of GINS complex)	7.56562	1.29782	5.82947	2.54336	8.44062e-31	1.56188e-28	up	yes
ENSG00000273331	TM4SF19-DYNLT2B	100534611	ENST00000442633	NA	NA	NA	NA	NA	TM4SF19-DYNLT2B readthrough (NMD candidate) [Source:HGNC Symbol;Acc:HGNC:49190]	nonsense_mediated_decay	NA	NA	2.5801	18.4435	0.139892	-2.83762	1.5348e-30	2.79948e-28	down	yes
ENSG00000225190	PLEKHM1	9842	ENST00000700123;ENST00000430334;ENST00000700125;ENST00000700128;ENST00000579131;ENST00000700130;ENST00000700124;ENST00000586084;ENST00000446609;ENST00000584420;ENST00000582119;ENST00000580404;ENST00000585506;ENST00000700132;ENST00000581448;ENST00000591580;ENST00000700127;ENST00000700126;ENST00000583150;ENST00000700133;ENST00000589780;ENST00000590991	GO:0005515(protein binding);GO:0005730(nucleolus);GO:0005764(lysosome);GO:0005765(lysosomal membrane);GO:0005768(endosome);GO:0006914(autophagy);GO:0010008(endosome membrane);GO:0015031(protein transport);GO:0016020(membrane);GO:0031410(cytoplasmic vesicle);GO:0031902(late endosome membrane);GO:0032418(lysosome localization);GO:0043231(intracellular membrane-bounded organelle);GO:0044754(autolyso…	05132(Salmonella infection);05132(Salmonella infection)	NA	NA	NA	pleckstrin homology and RUN domain containing M1 [Source:HGNC Symbol;Acc:HGNC:29017]	nonsense_mediated_decay;protein_coding;processed_transcript;retained_intron	DOID:0080001(bone_disease);DOID:0080005(bone_remodeling_disease);DOID:13533(osteopetrosis);DOID:17(musculoskeletal_system_disease);DOID:4254(osteosclerosis);DOID:4(disease);DOID:7(disease_of_anatomical_entity)	NA	3.71216	21.3329	0.174011	-2.52275	2.11179e-30	3.79766e-28	down	yes
ENSG00000114796	KLHL24	54800	ENST00000242810;ENST00000481126;ENST00000493074;ENST00000437402;ENST00000468101;ENST00000476808;ENST00000468001;ENST00000482138	GO:0005515(protein binding);GO:0005737(cytoplasm);GO:0005912(adherens junction);GO:0016567(protein ubiquitination);GO:0030054(cell junction);GO:0030057(desmosome);GO:0030424(axon);GO:0031463(Cul3-RING ubiquitin ligase complex);GO:0042995(cell projection);GO:0043204(perikaryon);GO:0045109(intermediate filament organization);GO:0051865(protein autoubiquitination);GO:2000312(regulation of kainate se…	NA	NA	NA	NA	kelch like family member 24 [Source:HGNC Symbol;Acc:HGNC:25947]	protein_coding;retained_intron	NA	NA	0.247261	1.82393	0.135565	-2.88294	2.8233e-30	5.00664e-28	down	yes
ENSG00000169851	PCDH7	5099	ENST00000621961;ENST00000695919;ENST00000695923;ENST00000361762;ENST00000543491	GO:0005509(calcium ion binding);GO:0005886(plasma membrane);GO:0005887(integral component of plasma membrane);GO:0007155(cell adhesion);GO:0007156(homophilic cell adhesion via plasma membrane adhesion molecules);GO:0016020(membrane);GO:0016021(integral component of membrane);GO:0031092(platelet alpha granule membrane);GO:0031092(platelet alpha granule membrane)	NA	NA	NA	NA	protocadherin 7 [Source:HGNC Symbol;Acc:HGNC:8659]	protein_coding;retained_intron	NA	R-HSA-481044(Surface deployment of platelet alpha granule membrane components);R-HSA-9013009(RHOA binds effectors at the plasma membrane);R-HSA-9013024(RHOB binds effectors at the plasma membrane)	0.850735	0.111269	7.64578	2.93466	4.63665e-30	8.10969e-28	up	yes
ENSG00000255339	ENSG00000255339		ENST00000557395;ENST00000533549	GO:0005739(mitochondrion);GO:0005743(mitochondrial inner membrane);GO:0005747(mitochondrial respiratory chain complex I);GO:0006120(mitochondrial electron transport, NADH to ubiquinone);GO:0016020(membrane);GO:0016021(integral component of membrane);GO:0016021(integral component of membrane)	NA	NA	NA	NA	NADH dehydrogenase (ubiquinone) 1 beta subcomplex, 8, 19kDa (NDUFB8) and SEC31 homolog B (S. cerevisiae) (SEC31B) readthrough	nonsense_mediated_decay	NA	NA	4.37596	0.544779	8.03254	3.00586	5.82384e-30	1.00485e-27	up	yes
ENSG00000132274	TRIM22	10346	ENST00000379965;ENST00000480395;ENST00000699054;ENST00000493494;ENST00000699058;ENST00000699052;ENST00000699053;ENST00000699055;ENST00000454828;ENST00000450670	GO:0000209(protein polyubiquitination);GO:0003713(transcription coactivator activity);GO:0003714(transcription corepressor activity);GO:0005515(protein binding);GO:0005634(nucleus);GO:0005654(nucleoplasm);GO:0005737(cytoplasm);GO:0005794(Golgi apparatus);GO:0005829(cytosol);GO:0006355(regulation of DNA-templated transcription);GO:0006955(immune response);GO:0008270(zinc ion binding);GO:0009615(re…	NA	NA	NA	NA	tripartite motif containing 22 [Source:HGNC Symbol;Acc:HGNC:16379]	protein_coding;retained_intron;nonsense_mediated_decay	DOID:0050117(disease_by_infectious_agent);DOID:0050686(organ_system_cancer);DOID:0060083(immune_system_cancer);DOID:0060100(musculoskeletal_system_cancer);DOID:1240(leukemia);DOID:14566(disease_of_cellular_proliferation);DOID:162(cancer);DOID:201(connective_tissue_cancer);DOID:2531(hematologic_cancer);DOID:3347(osteosarcoma);DOID:4(disease);DOID:526(Human_immunodeficiency_virus_infectious_disease…	R-HSA-1031716(Expression of IFNG-stimulated genes)	1.62798	9.33596	0.174378	-2.51971	6.52728e-30	1.1112e-27	down	yes
ENSG00000101265	RASSF2	9770	ENST00000379400	GO:0000775(chromosome, centromeric region);GO:0000776(kinetochore);GO:0001501(skeletal system development);GO:0001503(ossification);GO:0004672(protein kinase activity);GO:0005515(protein binding);GO:0005634(nucleus);GO:0005654(nucleoplasm);GO:0005694(chromosome);GO:0005737(cytoplasm);GO:0005794(Golgi apparatus);GO:0005829(cytosol);GO:0005886(plasma membrane);GO:0007049(cell cycle);GO:0007165(sign…	04392(Hippo signaling pathway - multiple species)	NA	NA	NA	Ras association domain family member 2 [Source:HGNC Symbol;Acc:HGNC:9883]	protein_coding	DOID:0050686(organ_system_cancer);DOID:0050687(cell_type_cancer);DOID:14566(disease_of_cellular_proliferation);DOID:1612(breast_cancer);DOID:162(cancer);DOID:1749(squamous_cell_carcinoma);DOID:305(carcinoma);DOID:3119(gastrointestinal_system_cancer);DOID:3571(liver_cancer);DOID:4(disease);DOID:5093(thoracic_cancer);DOID:684(hepatocellular_carcinoma);DOID:686(liver_carcinoma)	NA	3.5924	0.56934	6.30977	2.65759	9.7149e-30	1.6321e-27	up	yes
ENSG00000106003	LFNG	3955	ENST00000222725;ENST00000359574;ENST00000493850	GO:0000139(Golgi membrane);GO:0001541(ovarian follicle development);GO:0001756(somitogenesis);GO:0002315(marginal zone B cell differentiation);GO:0005576(extracellular region);GO:0005794(Golgi apparatus);GO:0007386(compartment pattern specification);GO:0007389(pattern specification process);GO:0008375(acetylglucosaminyltransferase activity);GO:0008593(regulation of Notch signaling pathway);GO:000…	00514(Other types of O-glycan biosynthesis);04330(Notch signaling pathway);05165(Human papillomavirus infection);05165(Human papillomavirus infection)	K05948	EC:2.4.1.222	NA	LFNG O-fucosylpeptide 3-beta-N-acetylglucosaminyltransferase [Source:HGNC Symbol;Acc:HGNC:6560]	protein_coding;retained_intron	DOID:0080001(bone_disease);DOID:0080006(bone_development_disease);DOID:17(musculoskeletal_system_disease);DOID:1934(dysostosis);DOID:4(disease);DOID:7(disease_of_anatomical_entity)	R-HSA-1912355(Glycosylation of Pre-NOTCH by FRINGE);R-HSA-5096538(Defective LFNG does not transfer GlcNAc to Pre-NOTCH)	3.53297	0.490327	7.20534	2.84907	1.00035e-29	1.65876e-27	up	yes
ENSG00000276043	UHRF1	29128	ENST00000620565;ENST00000624301;ENST00000650932;ENST00000616255;ENST00000615884;ENST00000622802	GO:0000122(negative regulation of transcription by RNA polymerase II);GO:0000785(chromatin);GO:0000791(euchromatin);GO:0000792(heterochromatin);GO:0000987(cis-regulatory region sequence-specific DNA binding);GO:0003677(DNA binding);GO:0004842(ubiquitin-protein transferase activity);GO:0005515(protein binding);GO:0005634(nucleus);GO:0005654(nucleoplasm);GO:0005657(replication fork);GO:0006281(DNA …	NA	K10638	EC:2.3.2.27	NA	ubiquitin like with PHD and ring finger domains 1 [Source:HGNC Symbol;Acc:HGNC:12556]	protein_coding	NA	R-HSA-5334099(UHRF1 binds chromatin with hemimethylated cytosine);R-HSA-5334151(DNMT1 methylates cytosine in hemimethylated DNA);R-HSA-5334160(UHRF1:Chromatin binds DNMT1)	30.1369	5.64123	5.34225	2.41745	1.49277e-29	2.44355e-27	up	yes
ENSG00000131737	KRT34	3885	ENST00000394001	GO:0005198(structural molecule activity);GO:0005515(protein binding);GO:0005615(extracellular space);GO:0005829(cytosol);GO:0005856(cytoskeleton);GO:0005882(intermediate filament);GO:0008544(epidermis development);GO:0030855(epithelial cell differentiation);GO:0045109(intermediate filament organization)	04915(Estrogen signaling pathway);05150(Staphylococcus aureus infection)	NA	NA	NA	keratin 34 [Source:HGNC Symbol;Acc:HGNC:6452]	protein_coding	NA	R-HSA-6805546(Keratin type I binds keratin type II);R-HSA-6805573(Keratin type I/type II heterodimers form tetramers);R-HSA-6806610(Keratin filament formation);R-HSA-6806613(Keratin tetramers bind to form unit length filaments);R-HSA-6806629(Formation of tonofilament bundles);R-HSA-6809393(Keratin filaments bind cell-cell adhesion complexes);R-HSA-6809663(Formation of hair keratin fibres);R-HSA-6…	1.3863	9.74883	0.142202	-2.81398	2.28669e-29	3.69575e-27	down	yes
ENSG00000153714	LURAP1L	286343	ENST00000319264;ENST00000489107	GO:0005515(protein binding);GO:0009966(regulation of signal transduction);GO:0043123(positive regulation of I-kappaB kinase/NF-kappaB signaling);GO:0043123(positive regulation of I-kappaB kinase/NF-kappaB signaling)	NA	NA	NA	NA	leucine rich adaptor protein 1 like [Source:HGNC Symbol;Acc:HGNC:31452]	protein_coding;processed_transcript	NA	NA	1.32931	8.44792	0.157353	-2.66792	2.65592e-29	4.22099e-27	down	yes
ENSG00000105559	PLEKHA4	57664	ENST00000263265;ENST00000593696;ENST00000355496;ENST00000601146;ENST00000597406;ENST00000597129;ENST00000596982	GO:0005515(protein binding);GO:0005546(phosphatidylinositol-4,5-bisphosphate binding);GO:0005737(cytoplasm);GO:0005886(plasma membrane);GO:0008289(lipid binding);GO:0016020(membrane);GO:0031234(extrinsic component of cytoplasmic side of plasma membrane);GO:0032266(phosphatidylinositol-3-phosphate binding);GO:0042802(identical protein binding);GO:0043325(phosphatidylinositol-3,4-bisphosphate bindi…	NA	NA	NA	NA	pleckstrin homology domain containing A4 [Source:HGNC Symbol;Acc:HGNC:14339]	protein_coding;retained_intron;nonsense_mediated_decay	NA	R-HSA-8870489(PLEKHA4,(5,6) bind PI3P)	2.7604	16.1158	0.171286	-2.54552	2.67779e-29	4.22099e-27	down	yes
ENSG00000162413	KLHL21	9903	ENST00000377663;ENST00000377658;ENST00000496707;ENST00000467612;ENST00000463043	GO:0004842(ubiquitin-protein transferase activity);GO:0005515(protein binding);GO:0005737(cytoplasm);GO:0005819(spindle);GO:0005827(polar microtubule);GO:0005829(cytosol);GO:0005856(cytoskeleton);GO:0007049(cell cycle);GO:0016567(protein ubiquitination);GO:0031463(Cul3-RING ubiquitin ligase complex);GO:0032465(regulation of cytokinesis);GO:0035853(chromosome passenger complex localization to spin…	NA	NA	NA	NA	kelch like family member 21 [Source:HGNC Symbol;Acc:HGNC:29041]	protein_coding	NA	R-HSA-8952630(NEDD8:AcM-UBE2M binds CRL3 E3 ubiquitin ligase complex);R-HSA-8952631(AcM-UBE2M transfers NEDD8 to CRL3 E3 ubiquitin ligase complex);R-HSA-8955241(CAND1 binds cytosolic CRL E3 ubiquitin ligases);R-HSA-8955289(COMMDs displace CAND1 from cytosolic CRL E3 ubiquitin ligase complexes);R-HSA-8956040(COP9 signalosome deneddylates cytosolic CRL E3 ubiquitin ligase complexes);R-HSA-983140(Tr…	12.0724	66.531	0.181455	-2.46232	2.85412e-29	4.44408e-27	down	yes
ENSG00000204531	POU5F1	5460,642559,645682	ENST00000259915;ENST00000471529;ENST00000513407;ENST00000512818;ENST00000606567;ENST00000441888	GO:0000122(negative regulation of transcription by RNA polymerase II);GO:0000785(chromatin);GO:0000976(transcription cis-regulatory region binding);GO:0000978(RNA polymerase II cis-regulatory region sequence-specific DNA binding);GO:0000981(DNA-binding transcription factor activity, RNA polymerase II-specific);GO:0000987(cis-regulatory region sequence-specific DNA binding);GO:0001227(DNA-binding …	04550(Signaling pathways regulating pluripotency of stem cells);04550(Signaling pathways regulating pluripotency of stem cells)	NA	NA	Pou	POU class 5 homeobox 1 [Source:HGNC Symbol;Acc:HGNC:9221]	protein_coding	NA	R-HSA-1112609(POU5F1 (OCT4), SOX2, NANOG, ZSCAN10, PRDM14, SMAD2, FOXP1-ES bind the POU5F1 (OCT4) promoter);R-HSA-2889036(Translation of OCT4 mRNA);R-HSA-2895778(POU5F1 (OCT4), STAT3 bind the SALL4 promoter);R-HSA-2972948(POU5F1 (OCT4), SOX2, NANOG bind the GSC promoter);R-HSA-2972949(POU5F1 (OCT4), SOX2, NANOG bind the EOMES promoter);R-HSA-2972952(POU5F1 (OCT4), NANOG bind the GATA6 promoter);R…	2.90181	0.355279	8.16768	3.02993	5.53954e-29	8.52155e-27	up	yes
ENSG00000286112	ENSG00000286112		ENST00000651925	GO:0003824(catalytic activity);GO:0006575(cellular modified amino acid metabolic process);GO:0009058(biosynthetic process);GO:0016212(kynurenine-oxoglutarate transaminase activity);GO:0030170(pyridoxal phosphate binding);GO:0047804(cysteine-S-conjugate beta-lyase activity);GO:0070189(kynurenine metabolic process);GO:0070548(L-glutamine aminotransferase activity);GO:0097052(L-kynurenine metabolic …	00270(Cysteine and methionine metabolism);00380(Tryptophan metabolism);00450(Selenocompound metabolism);01100(Metabolic pathways);05204(Chemical carcinogenesis)	K00816	EC:2.6.1.64;EC:2.6.1.7;EC:4.4.1.13	NA	kynurenine aminotransferase 1 [Source:NCBI gene (formerly Entrezgene);Acc:883]	protein_coding	NA	R-HSA-893593(phenylalanine + pyruvate => 3-(indol-3-yl)pyruvate + alanine);R-HSA-893596(PXLP-KYAT1 dimer transaminates L-KYN to AP-DOBu);R-HSA-893616(glutamine + pyruvate => 2-oxoglutaramate + alanine)	2.53009	0.404145	6.26035	2.64624	6.73955e-29	1.02441e-26	up	yes
ENSG00000272772	ENSG00000272772		ENST00000519718	GO:0005634(nucleus);GO:0005737(cytoplasm);GO:0006511(ubiquitin-dependent protein catabolic process);GO:0031146(SCF-dependent proteasomal ubiquitin-dependent protein catabolic process);GO:0097602(cullin family protein binding)	NA	NA	NA	NA	novel protein	protein_coding	NA	NA	7.53454	0.994046	7.57967	2.92213	7.54667e-29	1.1336e-26	up	yes
ENSG00000101447	FAM83D	81610	ENST00000619304;ENST00000619850	GO:0000922(spindle pole);GO:0001837(epithelial to mesenchymal transition);GO:0005515(protein binding);GO:0005737(cytoplasm);GO:0005819(spindle);GO:0005829(cytosol);GO:0005856(cytoskeleton);GO:0007049(cell cycle);GO:0007165(signal transduction);GO:0008017(microtubule binding);GO:0008283(cell population proliferation);GO:0015630(microtubule cytoskeleton);GO:0016477(cell migration);GO:0019894(kinesi…	NA	NA	NA	NA	family with sequence similarity 83 member D [Source:HGNC Symbol;Acc:HGNC:16122]	protein_coding	NA	NA	62.3764	11.9689	5.21155	2.38171	7.84918e-29	1.16533e-26	up	yes
ENSG00000257315	ZBED6	100381270	ENST00000550078	GO:0000122(negative regulation of transcription by RNA polymerase II);GO:0000785(chromatin);GO:0000976(transcription cis-regulatory region binding);GO:0000981(DNA-binding transcription factor activity, RNA polymerase II-specific);GO:0001227(DNA-binding transcription repressor activity, RNA polymerase II-specific);GO:0003677(DNA binding);GO:0005634(nucleus);GO:0005654(nucleoplasm);GO:0005730(nucle…	NA	NA	NA	zf-BED	zinc finger BED-type containing 6 [Source:HGNC Symbol;Acc:HGNC:33273]	protein_coding	NA	NA	1.23467	0.189012	6.53223	2.70757	8.38188e-29	1.23011e-26	up	yes
ENSG00000237649	KIFC1	3833	ENST00000428849;ENST00000450504;ENST00000486695;ENST00000494554	GO:0000070(mitotic sister chromatid segregation);GO:0000166(nucleotide binding);GO:0003777(microtubule motor activity);GO:0005524(ATP binding);GO:0005634(nucleus);GO:0005737(cytoplasm);GO:0005768(endosome);GO:0005769(early endosome);GO:0005815(microtubule organizing center);GO:0005819(spindle);GO:0005856(cytoskeleton);GO:0005871(kinesin complex);GO:0005874(microtubule);GO:0007018(microtubule-base…	NA	NA	NA	NA	kinesin family member C1 [Source:HGNC Symbol;Acc:HGNC:6389]	protein_coding;retained_intron	DOID:0014667(disease_of_metabolism);DOID:0050013(carbohydrate_metabolism_disease);DOID:0060158(acquired_metabolic_disease);DOID:14566(disease_of_cellular_proliferation);DOID:162(cancer);DOID:4194(glucose_metabolism_disease);DOID:4(disease);DOID:9351(diabetes_mellitus)	R-HSA-6811423(Retrograde vesicle is tethered at the ER by the NRZ complex and t-SNAREs);R-HSA-6811426(Retrograde COPI vesicles bind kinesin and microtubules);R-HSA-983259(Kinesins move along microtubules consuming ATP);R-HSA-983266(Kinesins bind microtubules);R-HSA-990478(Kinesin-14 is a dimer)	88.8617	17.2357	5.15568	2.36616	1.05559e-28	1.53157e-26	up	yes
ENSG00000156398	SFXN2	118980	ENST00000369893;ENST00000602647;ENST00000602764;ENST00000602287;ENST00000602660;ENST00000602868;ENST00000602785;ENST00000602831;ENST00000602439;ENST00000459894	GO:0005515(protein binding);GO:0005739(mitochondrion);GO:0005741(mitochondrial outer membrane);GO:0006811(ion transport);GO:0006865(amino acid transport);GO:0015075(ion transmembrane transporter activity);GO:0016020(membrane);GO:0016021(integral component of membrane);GO:0022857(transmembrane transporter activity);GO:0022889(serine transmembrane transporter activity);GO:0031305(integral component…	NA	NA	NA	NA	sideroflexin 2 [Source:HGNC Symbol;Acc:HGNC:16086]	protein_coding;retained_intron;processed_transcript;nonsense_mediated_decay	NA	NA	2.15003	0.344383	6.24312	2.64227	1.09846e-28	1.57586e-26	up	yes
ENSG00000137959	IFI44L	10964	ENST00000370751;ENST00000486882;ENST00000459784;ENST00000679651;ENST00000680295;ENST00000679848;ENST00000680621;ENST00000474002;ENST00000494910;ENST00000681613;ENST00000476876;ENST00000679998;ENST00000476521	GO:0003674(molecular_function);GO:0005525(GTP binding);GO:0005575(cellular_component);GO:0005737(cytoplasm);GO:0006955(immune response);GO:0051607(defense response to virus);GO:0051607(defense response to virus)	NA	NA	NA	NA	interferon induced protein 44 like [Source:HGNC Symbol;Acc:HGNC:17817]	protein_coding;retained_intron;nonsense_mediated_decay	NA	NA	0.855692	4.92799	0.173639	-2.52583	1.27197e-28	1.8045e-26	down	yes
ENSG00000185361	TNFAIP8L1	126282	ENST00000327473;ENST00000598107	GO:0005515(protein binding);GO:0005737(cytoplasm);GO:0032007(negative regulation of TOR signaling);GO:0042802(identical protein binding);GO:0042981(regulation of apoptotic process);GO:0042981(regulation of apoptotic process)	NA	NA	NA	NA	TNF alpha induced protein 8 like 1 [Source:HGNC Symbol;Acc:HGNC:28279]	protein_coding;processed_transcript	NA	R-HSA-8874470(TNFAIP8 proteins transfer PI(4,5)P2, PI(3,4,5)P3 from cytosolic vesicles to plasma membrane)	11.0559	2.07749	5.32174	2.4119	1.57088e-28	2.20406e-26	up	yes
ENSG00000243649	CFB	629	ENST00000472581;ENST00000482886;ENST00000483004;ENST00000425368;ENST00000497841;ENST00000698632;ENST00000698636;ENST00000482312;ENST00000698630;ENST00000461483;ENST00000452035;ENST00000467360;ENST00000465750;ENST00000498317;ENST00000467150;ENST00000698633	GO:0001848(complement binding);GO:0002376(immune system process);GO:0004252(serine-type endopeptidase activity);GO:0005515(protein binding);GO:0005576(extracellular region);GO:0005615(extracellular space);GO:0005886(plasma membrane);GO:0006508(proteolysis);GO:0006956(complement activation);GO:0006957(complement activation, alternative pathway);GO:0008233(peptidase activity);GO:0008236(serine-type…	04610(Complement and coagulation cascades);05150(Staphylococcus aureus infection);05171(Coronavirus disease - COVID-19);05171(Coronavirus disease - COVID-19)	K01335	EC:3.4.21.47	NA	complement factor B [Source:HGNC Symbol;Acc:HGNC:1037]	retained_intron;protein_coding;non_stop_decay;processed_transcript	DOID:0014667(disease_of_metabolism);DOID:0050013(carbohydrate_metabolism_disease);DOID:0050155(sensory_system_disease);DOID:0060158(acquired_metabolic_disease);DOID:10603(glucose_intolerance);DOID:10871(age_related_macular_degeneration);DOID:12554(hemolytic_uremic_syndrome);DOID:1492(eye_and_adnexa_disease);DOID:2007(degeneration_of_macula_and_posterior_pole);DOID:225(syndrome);DOID:2355(anemia);…	R-HSA-166817(Cleavage of C3 by C3 convertases);R-HSA-173680(Activation of C5);R-HSA-173740(Factor B binds to C3(H2O));R-HSA-173745(Factor D cleaves C3(H2O)-bound Factor B);R-HSA-173754(Properdin stabilizes C3b:Bb bound to cell surfaces);R-HSA-174551(Formation of alternative pathway C5 convertase);R-HSA-183122(Factor D cleaves C3b-bound Factor B);R-HSA-183126(Factor B binds to surface-associated C…	0.45991	3.14423	0.146271	-2.77328	1.59587e-28	2.21479e-26	down	yes
ENSG00000105011	ASF1B	55723	ENST00000263382;ENST00000590835;ENST00000592798;ENST00000589468;ENST00000474890	GO:0000785(chromatin);GO:0001835(blastocyst hatching);GO:0005515(protein binding);GO:0005634(nucleus);GO:0005654(nucleoplasm);GO:0006325(chromatin organization);GO:0006334(nucleosome assembly);GO:0006335(DNA replication-dependent chromatin assembly);GO:0007283(spermatogenesis);GO:0030154(cell differentiation);GO:0030527(structural constituent of chromatin);GO:0032991(protein-containing complex);G…	NA	NA	NA	NA	anti-silencing function 1B histone chaperone [Source:HGNC Symbol;Acc:HGNC:20996]	protein_coding;nonsense_mediated_decay	DOID:14566(disease_of_cellular_proliferation);DOID:162(cancer);DOID:4(disease)	NA	49.6777	9.62275	5.16253	2.36808	2.71425e-28	3.7264e-26	up	yes
ENSG00000196878	LAMB3	3914	ENST00000391911;ENST00000356082;ENST00000415782;ENST00000455193;ENST00000367030	GO:0005198(structural molecule activity);GO:0005201(extracellular matrix structural constituent);GO:0005515(protein binding);GO:0005576(extracellular region);GO:0005604(basement membrane);GO:0005610(laminin-5 complex);GO:0007155(cell adhesion);GO:0008544(epidermis development);GO:0009887(animal organ morphogenesis);GO:0009888(tissue development);GO:0016477(cell migration);GO:0034446(substrate adh…	04151(PI3K-Akt signaling pathway);04510(Focal adhesion);04512(ECM-receptor interaction);05145(Toxoplasmosis);05146(Amoebiasis);05165(Human papillomavirus infection);05200(Pathways in cancer);05222(Small cell lung cancer);05222(Small cell lung cancer)	NA	NA	NA	laminin subunit beta 3 [Source:HGNC Symbol;Acc:HGNC:6490]	protein_coding	DOID:0050117(disease_by_infectious_agent);DOID:0050686(organ_system_cancer);DOID:0050687(cell_type_cancer);DOID:14566(disease_of_cellular_proliferation);DOID:162(cancer);DOID:16(integumentary_system_disease);DOID:1749(squamous_cell_carcinoma);DOID:2730(epidermolysis_bullosa);DOID:2731(vesiculobullous_skin_disease);DOID:305(carcinoma);DOID:3119(gastrointestinal_system_cancer);DOID:3209(junctional_…	R-HSA-1566979(Laminin-332 degradation by laminin-322 degrading extracellular proteinases);R-HSA-216048(Integrins alpha3beta1, alpha6beta4 bind laminin-332, 511, 521, (211, 221));R-HSA-2213192(Hemidesmosome formation);R-HSA-2328129(Dystroglycan binds Laminins and Dystrophin);R-HSA-2396083(Laminins bind galactosyl sulfatide and related sulfated glycolipids);R-HSA-2396234(Collagen type VII binds lam…	103.886	550.932	0.188564	-2.40687	2.7967e-28	3.79876e-26	down	yes
ENSG00000159259	CHAF1B	8208	ENST00000314103;ENST00000480486;ENST00000481458	GO:0000785(chromatin);GO:0003682(chromatin binding);GO:0005515(protein binding);GO:0005634(nucleus);GO:0005654(nucleoplasm);GO:0005737(cytoplasm);GO:0005829(cytosol);GO:0006260(DNA replication);GO:0006281(DNA repair);GO:0006334(nucleosome assembly);GO:0006335(DNA replication-dependent chromatin assembly);GO:0006974(cellular response to DNA damage stimulus);GO:0007049(cell cycle);GO:0032991(protei…	NA	NA	NA	NA	chromatin assembly factor 1 subunit B [Source:HGNC Symbol;Acc:HGNC:1911]	protein_coding;processed_transcript	DOID:0050687(cell_type_cancer);DOID:10652(Alzheimer's_disease);DOID:1289(neurodegenerative_disease);DOID:1307(dementia);DOID:14566(disease_of_cellular_proliferation);DOID:150(disease_of_mental_health);DOID:1561(cognitive_disorder);DOID:162(cancer);DOID:1909(melanoma);DOID:225(syndrome);DOID:331(central_nervous_system_disease);DOID:4(disease);DOID:680(tauopathy);DOID:7(disease_of_anatomical_entity…	NA	14.7445	2.83992	5.19189	2.37626	3.06424e-28	4.11834e-26	up	yes
ENSG00000161981	SNRNP25	79622	ENST00000293861;ENST00000397876;ENST00000383018;ENST00000466183;ENST00000481947	GO:0000398(mRNA splicing, via spliceosome);GO:0005515(protein binding);GO:0005634(nucleus);GO:0005654(nucleoplasm);GO:0005681(spliceosomal complex);GO:0005689(U12-type spliceosomal complex);GO:0005829(cytosol);GO:0006397(mRNA processing);GO:0008380(RNA splicing);GO:0045171(intercellular bridge);GO:0045171(intercellular bridge)	NA	NA	NA	NA	small nuclear ribonucleoprotein U11/U12 subunit 25 [Source:HGNC Symbol;Acc:HGNC:14161]	protein_coding;nonsense_mediated_decay;retained_intron	NA	R-HSA-75079(Formation of AT-AC C complex);R-HSA-75080(Formation of AT-AC A complex);R-HSA-75081(Formation of AT-AC B Complex);R-HSA-75082(ATAC spliceosome mediated Lariat formation,5' splice site cleavage);R-HSA-75083(ATAC spliceosome mediated 3' splice site cleavage, exon ligation)	51.7669	10.0746	5.13834	2.3613	3.14641e-28	4.18473e-26	up	yes
ENSG00000104524	PYCR3	65263	ENST00000495276;ENST00000220966;ENST00000433751;ENST00000447926;ENST00000462036;ENST00000482616	GO:0004735(pyrroline-5-carboxylate reductase activity);GO:0005515(protein binding);GO:0005737(cytoplasm);GO:0005829(cytosol);GO:0006561(proline biosynthetic process);GO:0008652(cellular amino acid biosynthetic process);GO:0016491(oxidoreductase activity);GO:0045171(intercellular bridge);GO:0055129(L-proline biosynthetic process);GO:0072686(mitotic spindle);GO:0072686(mitotic spindle)	00330(Arginine and proline metabolism);01100(Metabolic pathways);01230(Biosynthesis of amino acids);01230(Biosynthesis of amino acids)	K00286	EC:1.5.1.2	NA	pyrroline-5-carboxylate reductase 3 [Source:HGNC Symbol;Acc:HGNC:25846]	protein_coding;nonsense_mediated_decay;retained_intron	NA	R-HSA-6783955(PYCRL decamer reduces (S)-1-pyrroline-5-carboxylate to L-Pro)	14.3574	2.6995	5.31852	2.41102	4.09995e-28	5.39671e-26	up	yes
ENSG00000172183	ISG20	3669	ENST00000379224;ENST00000306072;ENST00000559876;ENST00000557824;ENST00000558942;ENST00000560573	GO:0000175(3'-5'-exoribonuclease activity);GO:0000738(DNA catabolic process, exonucleolytic);GO:0002376(immune system process);GO:0003676(nucleic acid binding);GO:0003723(RNA binding);GO:0004518(nuclease activity);GO:0004527(exonuclease activity);GO:0005634(nucleus);GO:0005654(nucleoplasm);GO:0005730(nucleolus);GO:0005737(cytoplasm);GO:0006364(rRNA processing);GO:0006401(RNA catabolic process);GO…	NA	K12579	EC:3.1.13.1	NA	interferon stimulated exonuclease gene 20 [Source:HGNC Symbol;Acc:HGNC:6130]	protein_coding;retained_intron	DOID:0050117(disease_by_infectious_agent);DOID:12549(hepatitis_A);DOID:13250(diarrhea);DOID:1883(hepatitis_C);DOID:2237(hepatitis);DOID:3118(hepatobiliary_disease);DOID:409(liver_disease);DOID:4(disease);DOID:77(gastrointestinal_system_disease);DOID:7(disease_of_anatomical_entity);DOID:934(viral_infectious_disease);DOID:9682(yellow_fever)	R-HSA-1015702(Expression of IFN-induced genes)	2.17267	11.8146	0.183898	-2.44302	4.29914e-28	5.60117e-26	down	yes
ENSG00000122952	ZWINT	11130	ENST00000489649;ENST00000395405;ENST00000373944;ENST00000467523;ENST00000361148;ENST00000318387;ENST00000494312;ENST00000478181;ENST00000460654	GO:0000070(mitotic sister chromatid segregation);GO:0000775(chromosome, centromeric region);GO:0000776(kinetochore);GO:0005515(protein binding);GO:0005634(nucleus);GO:0005654(nucleoplasm);GO:0005694(chromosome);GO:0005737(cytoplasm);GO:0005829(cytosol);GO:0007049(cell cycle);GO:0007093(mitotic cell cycle checkpoint signaling);GO:0007094(mitotic spindle assembly checkpoint signaling);GO:0016604(nu…	NA	NA	NA	NA	ZW10 interacting kinetochore protein [Source:HGNC Symbol;Acc:HGNC:13195]	nonsense_mediated_decay;protein_coding;processed_transcript;retained_intron	NA	R-HSA-141409(Mad1 binds kinetochore);R-HSA-141422(MAD2 converted to an inhibitory state via interaction with Mad1);R-HSA-141431(MAD2 associates with the Mad1 kinetochore complex);R-HSA-141439(Release of activated MAD2 from kinetochores);R-HSA-1638803(Phosphorylation of cohesin by PLK1 at centromeres);R-HSA-1638821(PP2A-B56 dephosphorylates centromeric cohesin);R-HSA-2467809(ESPL1 (Separase) cleav…	76.5035	15.1126	5.06223	2.33977	5.28912e-28	6.82137e-26	up	yes
ENSG00000068489	PRR11	55771	ENST00000262293;ENST00000577457;ENST00000581182;ENST00000578777;ENST00000582004	GO:0005634(nucleus);GO:0005737(cytoplasm);GO:0016020(membrane);GO:0051726(regulation of cell cycle);GO:0051726(regulation of cell cycle)	NA	NA	NA	NA	proline rich 11 [Source:HGNC Symbol;Acc:HGNC:25619]	protein_coding;retained_intron	NA	NA	16.414	3.22463	5.09021	2.34773	5.90919e-28	7.54485e-26	up	yes
ENSG00000285130	ENSG00000285130		ENST00000642889;ENST00000643352;ENST00000642330;ENST00000645088	GO:0005515(protein binding);GO:0005737(cytoplasm);GO:0005886(plasma membrane);GO:0005923(bicellular tight junction);GO:0008199(ferric iron binding);GO:0016020(membrane);GO:0016226(iron-sulfur cluster assembly);GO:0055072(iron ion homeostasis);GO:0070160(tight junction);GO:0070160(tight junction)	NA	NA	NA	NA	novel protein	protein_coding;nonsense_mediated_decay	NA	NA	2.00694	10.7685	0.186371	-2.42375	7.51107e-28	9.49518e-26	down	yes
ENSG00000065328	MCM10	55388	ENST00000378714;ENST00000484800;ENST00000459751;ENST00000485659;ENST00000481292;ENST00000378694	GO:0003677(DNA binding);GO:0003688(DNA replication origin binding);GO:0003690(double-stranded DNA binding);GO:0003697(single-stranded DNA binding);GO:0005515(protein binding);GO:0005634(nucleus);GO:0005654(nucleoplasm);GO:0005730(nucleolus);GO:0006260(DNA replication);GO:0006270(DNA replication initiation);GO:0006974(cellular response to DNA damage stimulus);GO:0008283(cell population proliferati…	NA	NA	NA	NA	minichromosome maintenance 10 replication initiation factor [Source:HGNC Symbol;Acc:HGNC:18043]	protein_coding;retained_intron	NA	R-HSA-176298(Activation of claspin);R-HSA-176318(Loading of claspin onto DNA during replication origin firing);R-HSA-68914(DNA polymerase alpha:primase binds at the origin);R-HSA-68916(DNA Replication Factor A (RPA) associates with the pre-replicative complex at the origin);R-HSA-68917(Cdc45 associates with the pre-replicative complex at the origin);R-HSA-68918(CDK and DDK associate with the Mcm1…	3.07408	0.507445	6.05795	2.59883	1.05189e-27	1.31671e-25	up	yes
ENSG00000183048	SLC25A10	1468	ENST00000574129;ENST00000350690;ENST00000545862;ENST00000331531;ENST00000573246;ENST00000574884;ENST00000571876;ENST00000570310	GO:0005310(dicarboxylic acid transmembrane transporter activity);GO:0005515(protein binding);GO:0005634(nucleus);GO:0005654(nucleoplasm);GO:0005739(mitochondrion);GO:0005743(mitochondrial inner membrane);GO:0006094(gluconeogenesis);GO:0006811(ion transport);GO:0006817(phosphate ion transport);GO:0006835(dicarboxylic acid transport);GO:0006839(mitochondrial transport);GO:0008272(sulfate transport)…	04964(Proximal tubule bicarbonate reclamation);04964(Proximal tubule bicarbonate reclamation)	NA	NA	NA	solute carrier family 25 member 10 [Source:HGNC Symbol;Acc:HGNC:10980]	nonsense_mediated_decay;protein_coding;retained_intron	NA	R-HSA-1614546(Sulfate is exported to the cytosol in exchange for dicarboxylate);R-HSA-372843(SLC25A10 mediates exchange of malate and phosphate)	39.5785	7.85836	5.03649	2.33242	1.34044e-27	1.66162e-25	up	yes
ENSG00000157514	TSC22D3	1831	ENST00000372397;ENST00000372390;ENST00000372383;ENST00000514897;ENST00000503515;ENST00000486554	GO:0005515(protein binding);GO:0005634(nucleus);GO:0005737(cytoplasm);GO:0005829(cytosol);GO:0006357(regulation of transcription by RNA polymerase II);GO:0006970(response to osmotic stress);GO:0070236(negative regulation of activation-induced cell death of T cells);GO:0070236(negative regulation of activation-induced cell death of T cells)	NA	NA	NA	TSC22	TSC22 domain family member 3 [Source:HGNC Symbol;Acc:HGNC:3051]	protein_coding	DOID:0050686(organ_system_cancer);DOID:0080000(muscular_disease);DOID:0080001(bone_disease);DOID:0080005(bone_remodeling_disease);DOID:0080011(bone_resorption_disease);DOID:11476(osteoporosis);DOID:120(female_reproductive_organ_cancer);DOID:14566(disease_of_cellular_proliferation);DOID:162(cancer);DOID:17(musculoskeletal_system_disease);DOID:193(reproductive_organ_cancer);DOID:2151(malignant_ovar…	R-HSA-2682349(RAF1:SGK:TSC22D3:WPP ubiquitinates SCNN channels)	2.69509	14.6601	0.183838	-2.44349	1.3723e-27	1.68476e-25	down	yes
ENSG00000161681	SHANK1	50944	ENST00000293441;ENST00000468654;ENST00000461154;ENST00000391814;ENST00000483128;ENST00000391813	GO:0005515(protein binding);GO:0005737(cytoplasm);GO:0005829(cytosol);GO:0005886(plasma membrane);GO:0007399(nervous system development);GO:0007616(long-term memory);GO:0008022(protein C-terminus binding);GO:0008306(associative learning);GO:0014069(postsynaptic density);GO:0016020(membrane);GO:0017124(SH3 domain binding);GO:0030054(cell junction);GO:0030154(cell differentiation);GO:0030159(signal…	04724(Glutamatergic synapse);04724(Glutamatergic synapse)	NA	NA	NA	SH3 and multiple ankyrin repeat domains 1 [Source:HGNC Symbol;Acc:HGNC:15474]	protein_coding;nonsense_mediated_decay;retained_intron	NA	R-HSA-6794344(HOMER binds SHANK proteins);R-HSA-6794351(SHARPIN binds SHANK proteins);R-HSA-6794357(SHANK proteins bind GKAPs);R-HSA-6797554(ABP1 binds SHANK proteins)	0.128293	0.948588	0.135246	-2.88634	1.85468e-27	2.25529e-25	down	yes
ENSG00000168268	NT5DC2	64943	ENST00000422318;ENST00000466112;ENST00000307076;ENST00000463947;ENST00000479024;ENST00000462261;ENST00000486792;ENST00000471522;ENST00000489316;ENST00000478091;ENST00000490681;ENST00000469616	GO:0008253(5'-nucleotidase activity);GO:0016787(hydrolase activity);GO:0046872(metal ion binding);GO:0046872(metal ion binding)	NA	NA	NA	NA	5'-nucleotidase domain containing 2 [Source:HGNC Symbol;Acc:HGNC:25717]	protein_coding;retained_intron;processed_transcript	NA	NA	20.9112	4.18682	4.99453	2.32035	2.62359e-27	3.16019e-25	up	yes
ENSG00000100292	HMOX1	3162	ENST00000679074;ENST00000216117;ENST00000412893;ENST00000677931;ENST00000481190;ENST00000494998	GO:0001525(angiogenesis);GO:0001666(response to hypoxia);GO:0001935(endothelial cell proliferation);GO:0002246(wound healing involved in inflammatory response);GO:0002686(negative regulation of leukocyte migration);GO:0004392(heme oxygenase (decyclizing) activity);GO:0004630(phospholipase D activity);GO:0005198(structural molecule activity);GO:0005515(protein binding);GO:0005615(extracellular spa…	00860(Porphyrin and chlorophyll metabolism);01100(Metabolic pathways);04066(HIF-1 signaling pathway);04216(Ferroptosis);04978(Mineral absorption);05200(Pathways in cancer);05206(MicroRNAs in cancer);05225(Hepatocellular carcinoma);05418(Fluid shear stress and atherosclerosis);05418(Fluid shear stress and atherosclerosis)	K00510	EC:1.14.14.18	NA	heme oxygenase 1 [Source:HGNC Symbol;Acc:HGNC:5013]	protein_coding;nonsense_mediated_decay;retained_intron	DOID:0014667(disease_of_metabolism);DOID:0050013(carbohydrate_metabolism_disease);DOID:0050117(disease_by_infectious_agent);DOID:0050161(lower_respiratory_tract_disease);DOID:0050177(monogenic_disease);DOID:0050615(respiratory_system_cancer);DOID:0050686(organ_system_cancer);DOID:0050687(cell_type_cancer);DOID:0050737(autosomal_recessive_disease);DOID:0050739(autosomal_genetic_disease);DOID:00508…	R-HSA-1250272(TXNIP binds NLRP3);R-HSA-189398(HMOX1 dimer, HMOX2 cleave heme);R-HSA-6797268(Expression of HMOX1);R-HSA-9609860(Tail-anchored protein:SGTA:BAG6:GET4:UBL4A:ASNA1:ATP dissociates and ASNA1 hydrolyzes ATP yielding Tail-anchored protein:ASNA1:ADP);R-HSA-9609899(Tail-anchored protein:ASNA1:ADP binds WRB:CAMLG at the endoplasmic reticulum membrane);R-HSA-9609917(Tail-anchored protein:ASN…	118.331	606.756	0.195022	-2.35829	2.88055e-27	3.43728e-25	down	yes
ENSG00000116584	ARHGEF2	9181	ENST00000470541;ENST00000361247;ENST00000313667;ENST00000313695;ENST00000470874;ENST00000696600;ENST00000609707;ENST00000696601;ENST00000474428;ENST00000462460;ENST00000470975;ENST00000471589;ENST00000608543;ENST00000465079;ENST00000476273;ENST00000487755;ENST00000673475;ENST00000495070;ENST00000497907	GO:0000902(cell morphogenesis);GO:0002376(immune system process);GO:0005085(guanyl-nucleotide exchange factor activity);GO:0005515(protein binding);GO:0005737(cytoplasm);GO:0005794(Golgi apparatus);GO:0005819(spindle);GO:0005829(cytosol);GO:0005856(cytoskeleton);GO:0005874(microtubule);GO:0005886(plasma membrane);GO:0005923(bicellular tight junction);GO:0005925(focal adhesion);GO:0006886(intracel…	04530(Tight junction);05130(Pathogenic Escherichia coli infection);05131(Shigellosis);05418(Fluid shear stress and atherosclerosis);05418(Fluid shear stress and atherosclerosis)	NA	NA	NA	Rho/Rac guanine nucleotide exchange factor 2 [Source:HGNC Symbol;Acc:HGNC:682]	protein_coding;nonsense_mediated_decay;processed_transcript;retained_intron	DOID:0050687(cell_type_cancer);DOID:14566(disease_of_cellular_proliferation);DOID:162(cancer);DOID:1909(melanoma);DOID:2994(germ_cell_cancer);DOID:4766(embryoma);DOID:4(disease);DOID:688(embryonal_cancer)	R-HSA-205039(p75NTR indirectly activates RAC and Cdc42 via a guanyl-nucleotide exchange factor);R-HSA-419166(GEFs activate RhoA,B,C);R-HSA-8980691(RHOA GEFs activate RHOA);R-HSA-9013023(RHOB GEFs activate RHOB)	11.4411	58.7243	0.194828	-2.35973	3.37614e-27	3.99135e-25	down	yes
ENSG00000168994	PXDC1	221749	ENST00000380283;ENST00000380277;ENST00000485986	GO:0035091(phosphatidylinositol binding);GO:0035091(phosphatidylinositol binding)	NA	NA	NA	NA	PX domain containing 1 [Source:HGNC Symbol;Acc:HGNC:21361]	protein_coding;processed_transcript	NA	NA	20.4632	105.285	0.194359	-2.3632	4.27727e-27	5.01029e-25	down	yes
ENSG00000196684	HSH2D	84941	ENST00000613986;ENST00000535834;ENST00000586872;ENST00000616645;ENST00000591154;ENST00000613195;ENST00000593031;ENST00000616070	GO:0005515(protein binding);GO:0005634(nucleus);GO:0005737(cytoplasm);GO:0007165(signal transduction);GO:0007165(signal transduction)	NA	NA	NA	NA	hematopoietic SH2 domain containing [Source:HGNC Symbol;Acc:HGNC:24920]	protein_coding;retained_intron;nonsense_mediated_decay	NA	NA	2.12618	11.7088	0.181588	-2.46126	7.27078e-27	8.43939e-25	down	yes
ENSG00000101412	E2F1	1869	ENST00000343380	GO:0000077(DNA damage checkpoint signaling);GO:0000082(G1/S transition of mitotic cell cycle);GO:0000083(regulation of transcription involved in G1/S transition of mitotic cell cycle);GO:0000122(negative regulation of transcription by RNA polymerase II);GO:0000228(nuclear chromosome);GO:0000785(chromatin);GO:0000976(transcription cis-regulatory region binding);GO:0000978(RNA polymerase II cis-reg…	01522(Endocrine resistance);04110(Cell cycle);04137(Mitophagy - animal);04218(Cellular senescence);04934(Cushing syndrome);05160(Hepatitis C);05161(Hepatitis B);05163(Human cytomegalovirus infection);05165(Human papillomavirus infection);05166(Human T-cell leukemia virus 1 infection);05167(Kaposi sarcoma-associated herpesvirus infection);05169(Epstein-Barr virus infection);05200(Pathways in cance…	NA	NA	E2F	E2F transcription factor 1 [Source:HGNC Symbol;Acc:HGNC:3113]	protein_coding	DOID:0014667(disease_of_metabolism);DOID:0050013(carbohydrate_metabolism_disease);DOID:0050117(disease_by_infectious_agent);DOID:0050155(sensory_system_disease);DOID:0050177(monogenic_disease);DOID:0050615(respiratory_system_cancer);DOID:0050686(organ_system_cancer);DOID:0050687(cell_type_cancer);DOID:0050737(autosomal_recessive_disease);DOID:0050739(autosomal_genetic_disease);DOID:0060083(immune…	R-HSA-113643(Replication initiation regulation by Rb1/E2F1);R-HSA-140217(Transactivation of PMAIP1 (NOXA) by E2F1);R-HSA-140221(Transactivation of BBC3 (PUMA) by E2F1);R-HSA-187937(Association of Cyclin A:phospho-Cdk2(Thr 160) with E2F1/E2F3);R-HSA-187959(Phosphorylation of E2F1/E2F3 by Cyclin A:phosph-Cdk2(Thr 160));R-HSA-188345(The CDC25A gene transcription is stimulated by MYC and E2F1 and inh…	26.8832	5.42924	4.95156	2.30788	7.36057e-27	8.46664e-25	up	yes
ENSG00000172216	CEBPB	1051	ENST00000303004	GO:0000122(negative regulation of transcription by RNA polymerase II);GO:0000779(condensed chromosome, centromeric region);GO:0000785(chromatin);GO:0000976(transcription cis-regulatory region binding);GO:0000977(RNA polymerase II transcription regulatory region sequence-specific DNA binding);GO:0000978(RNA polymerase II cis-regulatory region sequence-specific DNA binding);GO:0000979(RNA polymeras…	04657(IL-17 signaling pathway);04668(TNF signaling pathway);05152(Tuberculosis);05202(Transcriptional misregulation in cancer)	NA	NA	TF_bZIP	CCAAT enhancer binding protein beta [Source:HGNC Symbol;Acc:HGNC:1834]	protein_coding	DOID:0014667(disease_of_metabolism);DOID:0050013(carbohydrate_metabolism_disease);DOID:0050117(disease_by_infectious_agent);DOID:0050615(respiratory_system_cancer);DOID:0050622(reproductive_organ_benign_neoplasm);DOID:0050686(organ_system_cancer);DOID:0050687(cell_type_cancer);DOID:0060056(hypersensitivity_reaction_disease);DOID:0060072(benign_neoplasm);DOID:0060083(immune_system_cancer);DOID:006…	R-HSA-1183058(Expression of Adiponectin);R-HSA-1791118(Expression of ASNS (Asparagine Synthetase));R-HSA-3790130(Regulation of IL6 transcription);R-HSA-3790137(Stimulation of IL8 transcription in senescent cells);R-HSA-381283(Expression of PPARG);R-HSA-381337(Expression of CEBPB in adipogenesis);R-HSA-381377(Expression of KLF5);R-HSA-3857305(Activated CEBPB and NFKB complex bind IL6 promoter);R-H…	89.9443	454.807	0.197764	-2.33815	7.82673e-27	8.92247e-25	down	yes
ENSG00000099625	CBARP	255057	ENST00000590083;ENST00000648750;ENST00000589260;ENST00000650044;ENST00000591127;ENST00000215376	GO:0005515(protein binding);GO:0005886(plasma membrane);GO:0016020(membrane);GO:0016021(integral component of membrane);GO:0030054(cell junction);GO:0030141(secretory granule);GO:0030426(growth cone);GO:0030672(synaptic vesicle membrane);GO:0031410(cytoplasmic vesicle);GO:0042995(cell projection);GO:0044325(transmembrane transporter binding);GO:0045202(synapse);GO:0045955(negative regulation of c…	NA	NA	NA	NA	CACN subunit beta associated regulatory protein [Source:HGNC Symbol;Acc:HGNC:28617]	protein_coding;nonsense_mediated_decay;retained_intron	NA	NA	1.98105	10.5513	0.187755	-2.41308	1.83941e-26	2.07837e-24	down	yes
ENSG00000183760	ACP7	390928	ENST00000331256;ENST00000594229;ENST00000601575	GO:0003993(acid phosphatase activity);GO:0005576(extracellular region);GO:0016787(hydrolase activity);GO:0046872(metal ion binding);GO:0046872(metal ion binding)	NA	NA	NA	NA	acid phosphatase 7, tartrate resistant (putative) [Source:HGNC Symbol;Acc:HGNC:33781]	protein_coding;nonsense_mediated_decay	NA	NA	1.43424	8.14047	0.176187	-2.50482	1.87182e-26	2.09644e-24	down	yes
ENSG00000168209	DDIT4	54541	ENST00000471240;ENST00000473155;ENST00000491934;ENST00000307365	GO:0001666(response to hypoxia);GO:0001764(neuron migration);GO:0005515(protein binding);GO:0005737(cytoplasm);GO:0005739(mitochondrion);GO:0005829(cytosol);GO:0006915(apoptotic process);GO:0007420(brain development);GO:0009968(negative regulation of signal transduction);GO:0010801(negative regulation of peptidyl-threonine phosphorylation);GO:0030182(neuron differentiation);GO:0032006(regulation …	04140(Autophagy - animal);04150(mTOR signaling pathway);04151(PI3K-Akt signaling pathway);05206(MicroRNAs in cancer);05206(MicroRNAs in cancer)	NA	NA	NA	DNA damage inducible transcript 4 [Source:HGNC Symbol;Acc:HGNC:24944]	retained_intron;nonsense_mediated_decay;protein_coding	DOID:0050177(monogenic_disease);DOID:0050615(respiratory_system_cancer);DOID:0050686(organ_system_cancer);DOID:0050687(cell_type_cancer);DOID:0050736(autosomal_dominant_disease);DOID:0050739(autosomal_genetic_disease);DOID:10652(Alzheimer's_disease);DOID:1289(neurodegenerative_disease);DOID:1307(dementia);DOID:1324(lung_cancer);DOID:13515(tuberous_sclerosis);DOID:14566(disease_of_cellular_prolife…	R-HSA-5632386(TP63/TP53 stimulates transcription of DDIT4 gene);R-HSA-5632732(p-S939,T1462-TSC2 binding to 14-3-3 dimer is negatively regulated by DDIT4);R-HSA-5632738(DDIT4 binds 14-3-3 dimer)	71.2397	355.381	0.20046	-2.31861	1.97828e-26	2.19641e-24	down	yes
ENSG00000137135	ARHGEF39	84904	ENST00000475323;ENST00000378387;ENST00000490970;ENST00000490638;ENST00000468876	GO:0005085(guanyl-nucleotide exchange factor activity);GO:0005515(protein binding);GO:0005886(plasma membrane);GO:0016020(membrane);GO:0030335(positive regulation of cell migration);GO:0050790(regulation of catalytic activity);GO:0110165(cellular anatomical entity);GO:0110165(cellular anatomical entity)	NA	NA	NA	NA	Rho guanine nucleotide exchange factor 39 [Source:HGNC Symbol;Acc:HGNC:25909]	nonsense_mediated_decay;protein_coding;processed_transcript	NA	R-HSA-205039(p75NTR indirectly activates RAC and Cdc42 via a guanyl-nucleotide exchange factor);R-HSA-419166(GEFs activate RhoA,B,C);R-HSA-9013143(RAC1 GEFs activate RAC1)	4.09931	0.76954	5.32696	2.41331	2.6634e-26	2.93158e-24	up	yes
ENSG00000126368	NR1D1	9572	ENST00000246672	GO:0000122(negative regulation of transcription by RNA polymerase II);GO:0000785(chromatin);GO:0000976(transcription cis-regulatory region binding);GO:0000977(RNA polymerase II transcription regulatory region sequence-specific DNA binding);GO:0000978(RNA polymerase II cis-regulatory region sequence-specific DNA binding);GO:0000981(DNA-binding transcription factor activity, RNA polymerase II-speci…	04710(Circadian rhythm)	NA	NA	THR-like	nuclear receptor subfamily 1 group D member 1 [Source:HGNC Symbol;Acc:HGNC:7962]	protein_coding	NA	R-HSA-1368065(Expression of NPAS2);R-HSA-1368069(NR1D1 (REV-ERBA) binds heme, the ARNTL gene, and recruits corepressors.);R-HSA-1368119(Expression of CLOCK);R-HSA-1368140(Expression of PPARGC1A (PGC-1alpha));R-HSA-376419(Formation of NR-MED1 Coactivator Complex);R-HSA-382096(Formation of NR-NCOR Corepressor Complex);R-HSA-400342(Expression of ARNTL (BMAL1));R-HSA-549475(Expression of NR1D1 (REV-E…	7.07756	35.8861	0.197223	-2.3421	2.89837e-26	3.16294e-24	down	yes
ENSG00000196611	MMP1	4312	ENST00000315274;ENST00000681643	GO:0004175(endopeptidase activity);GO:0004222(metalloendopeptidase activity);GO:0004252(serine-type endopeptidase activity);GO:0005576(extracellular region);GO:0006508(proteolysis);GO:0008233(peptidase activity);GO:0008237(metallopeptidase activity);GO:0008270(zinc ion binding);GO:0016787(hydrolase activity);GO:0022617(extracellular matrix disassembly);GO:0030198(extracellular matrix organization…	03320(PPAR signaling pathway);04657(IL-17 signaling pathway);04926(Relaxin signaling pathway);05171(Coronavirus disease - COVID-19);05200(Pathways in cancer);05219(Bladder cancer);05323(Rheumatoid arthritis);05323(Rheumatoid arthritis)	K01388	EC:3.4.24.7	NA	matrix metallopeptidase 1 [Source:HGNC Symbol;Acc:HGNC:7155]	protein_coding;retained_intron	DOID:0014667(disease_of_metabolism);DOID:0050013(carbohydrate_metabolism_disease);DOID:0050117(disease_by_infectious_agent);DOID:0050155(sensory_system_disease);DOID:0050161(lower_respiratory_tract_disease);DOID:0050338(primary_bacterial_infectious_disease);DOID:0050589(inflammatory_bowel_disease);DOID:0050615(respiratory_system_cancer);DOID:0050686(organ_system_cancer);DOID:0050687(cell_type_can…	R-HSA-1454757(Gelatin degradation by MMP1, 2, 3, 7, 8, 9, 12, 13);R-HSA-1454781(MMP1,3,13 (2, 7-12, 19) binding by Alpha-2 macroglubulin);R-HSA-1454822(Collagen type I degradation by MMP1,2,8,13, PRSS2);R-HSA-1474197(Collagen type II degradation by MMP1,3,8,13,PRSS2);R-HSA-1474213(Collagen type III degradation by MMP1,8,9,13);R-HSA-1564120(Collagen type VII degradation by MMP1,2,3);R-HSA-1564143(…	1.31566	7.62293	0.172593	-2.53456	3.32448e-26	3.5972e-24	down	yes
ENSG00000115963	RND3	390	ENST00000375734;ENST00000263895;ENST00000497865;ENST00000473639;ENST00000466334	GO:0000139(Golgi membrane);GO:0000166(nucleotide binding);GO:0003924(GTPase activity);GO:0005515(protein binding);GO:0005525(GTP binding);GO:0005794(Golgi apparatus);GO:0005856(cytoskeleton);GO:0005886(plasma membrane);GO:0005925(focal adhesion);GO:0005938(cell cortex);GO:0007015(actin filament organization);GO:0007155(cell adhesion);GO:0007163(establishment or maintenance of cell polarity);GO:00…	NA	NA	NA	NA	Rho family GTPase 3 [Source:HGNC Symbol;Acc:HGNC:671]	protein_coding;retained_intron	DOID:0050686(organ_system_cancer);DOID:0050687(cell_type_cancer);DOID:10283(prostate_cancer);DOID:14566(disease_of_cellular_proliferation);DOID:162(cancer);DOID:1909(melanoma);DOID:193(reproductive_organ_cancer);DOID:3856(male_reproductive_organ_cancer);DOID:4(disease)	R-HSA-9696267(RND3 binds GTP);R-HSA-9696268(RND3 binds effectors)	2.60524	13.7327	0.18971	-2.39813	3.92693e-26	4.21337e-24	down	yes
ENSG00000168496	FEN1	2237	ENST00000305885;ENST00000535307;ENST00000535723	GO:0000287(magnesium ion binding);GO:0000724(double-strand break repair via homologous recombination);GO:0000781(chromosome, telomeric region);GO:0003677(DNA binding);GO:0003684(damaged DNA binding);GO:0003690(double-stranded DNA binding);GO:0003824(catalytic activity);GO:0004518(nuclease activity);GO:0004519(endonuclease activity);GO:0004523(RNA-DNA hybrid ribonuclease activity);GO:0004527(exonu…	03030(DNA replication);03410(Base excision repair);03450(Non-homologous end-joining);03450(Non-homologous end-joining)	NA	NA	NA	flap structure-specific endonuclease 1 [Source:HGNC Symbol;Acc:HGNC:3650]	protein_coding	DOID:14566(disease_of_cellular_proliferation);DOID:162(cancer);DOID:225(syndrome);DOID:4(disease)	R-HSA-110363(FEN1 bound to PCNA and APEX1 cleaves flap ssDNA);R-HSA-110364(PCNA:POLD,POLE:RPA:RFC and FEN1 bind APEX1);R-HSA-110368(POLD,POLE-mediated DNA strand displacement synthesis);R-HSA-174446(Removal of remaining Flap from the C-strand);R-HSA-182876(Removal of plus-strand flap and gap closure complete synthesis of linear duplex viral DNA);R-HSA-5649873(PARP1,PARP2 dimers and FEN1 bind POLB…	89.1533	18.8665	4.72549	2.24046	4.26012e-26	4.53277e-24	up	yes
ENSG00000088448	ANKRD10	55608	ENST00000267339;ENST00000310847;ENST00000464579;ENST00000465753;ENST00000463156;ENST00000475809;ENST00000460846;ENST00000494859;ENST00000485844;ENST00000603993;ENST00000489973	GO:0005515(protein binding);GO:0005654(nucleoplasm);GO:0005654(nucleoplasm)	NA	NA	NA	NA	ankyrin repeat domain 10 [Source:HGNC Symbol;Acc:HGNC:20265]	protein_coding;processed_transcript;nonsense_mediated_decay	NA	NA	6.10288	30.3588	0.201025	-2.31455	6.93399e-26	7.3168e-24	down	yes
ENSG00000103522	IL21R	50615	ENST00000337929;ENST00000561953;ENST00000395754	GO:0001532(interleukin-21 receptor activity);GO:0004888(transmembrane signaling receptor activity);GO:0004896(cytokine receptor activity);GO:0005515(protein binding);GO:0005886(plasma membrane);GO:0009897(external side of plasma membrane);GO:0016020(membrane);GO:0016021(integral component of membrane);GO:0016064(immunoglobulin mediated immune response);GO:0019221(cytokine-mediated signaling pathw…	04060(Cytokine-cytokine receptor interaction);04630(JAK-STAT signaling pathway);04659(Th17 cell differentiation);05321(Inflammatory bowel disease);05321(Inflammatory bowel disease)	NA	NA	NA	interleukin 21 receptor [Source:HGNC Symbol;Acc:HGNC:6006]	protein_coding;retained_intron	DOID:0014667(disease_of_metabolism);DOID:0050013(carbohydrate_metabolism_disease);DOID:0050686(organ_system_cancer);DOID:0060083(immune_system_cancer);DOID:0060158(acquired_metabolic_disease);DOID:0080001(bone_disease);DOID:1036(chronic_leukemia);DOID:1037(lymphoblastic_leukemia);DOID:1040(chronic_lymphocytic_leukemia);DOID:1240(leukemia);DOID:14566(disease_of_cellular_proliferation);DOID:162(can…	R-HSA-9005980(IL21 binds IL21R:JAK1);R-HSA-9006844(IL21:IL21R:JAK1 binds IL2RG:JAK3);R-HSA-9006850(IL21 receptor JAK phosphorylation);R-HSA-9006870(IL21 receptor STAT phosphorylation);R-HSA-9006873(IL21 receptor STAT binding)	0.186404	1.41201	0.132013	-2.92125	8.50559e-26	8.90159e-24	down	yes
ENSG00000197279	ZNF165	7718	ENST00000683778;ENST00000377325	GO:0000978(RNA polymerase II cis-regulatory region sequence-specific DNA binding);GO:0000981(DNA-binding transcription factor activity, RNA polymerase II-specific);GO:0003677(DNA binding);GO:0005515(protein binding);GO:0005634(nucleus);GO:0006357(regulation of transcription by RNA polymerase II);GO:0046872(metal ion binding);GO:0046872(metal ion binding)	NA	NA	NA	zf-C2H2	zinc finger protein 165 [Source:HGNC Symbol;Acc:HGNC:12953]	protein_coding	NA	NA	0.549721	3.77353	0.145678	-2.77914	1.02241e-25	1.06131e-23	down	yes
ENSG00000196208	GREB1	9687	ENST00000396123;ENST00000472040;ENST00000470980;ENST00000381486	GO:0005654(nucleoplasm);GO:0016020(membrane);GO:0016021(integral component of membrane);GO:0070062(extracellular exosome);GO:0070062(extracellular exosome)	NA	NA	NA	NA	growth regulating estrogen receptor binding 1 [Source:HGNC Symbol;Acc:HGNC:24885]	protein_coding;retained_intron	DOID:14566(disease_of_cellular_proliferation);DOID:162(cancer);DOID:4(disease)	R-HSA-9011961(GREB1 translation is negatively regulated by miR-26A and B);R-HSA-9038052(GREB1 binds ESR1:ESTG and co-activators)	0.152175	0.972387	0.156496	-2.6758	1.14037e-25	1.17421e-23	down	yes
ENSG00000078081	LAMP3	27074	ENST00000265598;ENST00000470251	GO:0002250(adaptive immune response);GO:0002376(immune system process);GO:0005737(cytoplasm);GO:0005764(lysosome);GO:0005765(lysosomal membrane);GO:0005768(endosome);GO:0005769(early endosome);GO:0005886(plasma membrane);GO:0009986(cell surface);GO:0010008(endosome membrane);GO:0010506(regulation of autophagy);GO:0010628(positive regulation of gene expression);GO:0016020(membrane);GO:0016021(inte…	04142(Lysosome);04142(Lysosome)	NA	NA	NA	lysosomal associated membrane protein 3 [Source:HGNC Symbol;Acc:HGNC:14582]	protein_coding	DOID:0050687(cell_type_cancer);DOID:0080001(bone_disease);DOID:14566(disease_of_cellular_proliferation);DOID:162(cancer);DOID:17(musculoskeletal_system_disease);DOID:1909(melanoma);DOID:3342(bone_inflammation_disease);DOID:4(disease);DOID:7148(rheumatoid_arthritis);DOID:7(disease_of_anatomical_entity);DOID:848(arthritis)	NA	5.43249	26.7604	0.203005	-2.30042	1.70781e-25	1.74443e-23	down	yes
ENSG00000076382	SPAG5	10615	ENST00000321765;ENST00000580567;ENST00000580406;ENST00000580676;ENST00000578479;ENST00000580682;ENST00000580377;ENST00000584206;ENST00000582175;ENST00000577259	GO:0000070(mitotic sister chromatid segregation);GO:0000775(chromosome, centromeric region);GO:0000776(kinetochore);GO:0000922(spindle pole);GO:0005515(protein binding);GO:0005694(chromosome);GO:0005737(cytoplasm);GO:0005815(microtubule organizing center);GO:0005819(spindle);GO:0005829(cytosol);GO:0005856(cytoskeleton);GO:0005874(microtubule);GO:0007049(cell cycle);GO:0007051(spindle organization…	NA	NA	NA	NA	sperm associated antigen 5 [Source:HGNC Symbol;Acc:HGNC:13452]	protein_coding;nonsense_mediated_decay;retained_intron	NA	NA	30.0967	6.51947	4.61644	2.20678	2.47004e-25	2.50297e-23	up	yes
ENSG00000070669	ASNS	440	ENST00000175506;ENST00000394308;ENST00000394309;ENST00000444334;ENST00000454046;ENST00000495255;ENST00000414884;ENST00000453600;ENST00000462436;ENST00000487714;ENST00000437657;ENST00000448127;ENST00000442734;ENST00000451771	GO:0000166(nucleotide binding);GO:0004066(asparagine synthase (glutamine-hydrolyzing) activity);GO:0005515(protein binding);GO:0005524(ATP binding);GO:0005829(cytosol);GO:0006529(asparagine biosynthetic process);GO:0006541(glutamine metabolic process);GO:0008652(cellular amino acid biosynthetic process);GO:0016874(ligase activity);GO:0042149(cellular response to glucose starvation);GO:0043066(neg…	00250(Alanine, aspartate and glutamate metabolism);01100(Metabolic pathways);01230(Biosynthesis of amino acids);01230(Biosynthesis of amino acids)	K01953	EC:6.3.5.4	NA	asparagine synthetase (glutamine-hydrolyzing) [Source:HGNC Symbol;Acc:HGNC:753]	protein_coding;nonsense_mediated_decay;retained_intron	DOID:0050686(organ_system_cancer);DOID:0060083(immune_system_cancer);DOID:1037(lymphoblastic_leukemia);DOID:1240(leukemia);DOID:14566(disease_of_cellular_proliferation);DOID:162(cancer);DOID:2531(hematologic_cancer);DOID:4(disease);DOID:9952(acute_lymphocytic_leukemia)	R-HSA-1791118(Expression of ASNS (Asparagine Synthetase));R-HSA-70599(aspartate + glutamine + ATP <=> asparagine + glutamate + AMP + pyrophosphate [ASNS])	10.387	50.1938	0.206939	-2.27273	2.55397e-25	2.56765e-23	down	yes
ENSG00000006652	IFRD1	3475	ENST00000403825;ENST00000005558;ENST00000675578;ENST00000429071;ENST00000470441;ENST00000675717;ENST00000421296;ENST00000674915;ENST00000476927;ENST00000489994	GO:0005634(nucleus);GO:0005737(cytoplasm);GO:0007518(myoblast fate determination);GO:0014706(striated muscle tissue development);GO:0016528(sarcoplasm);GO:0030154(cell differentiation);GO:0030517(negative regulation of axon extension);GO:0042692(muscle cell differentiation);GO:0043403(skeletal muscle tissue regeneration);GO:0048671(negative regulation of collateral sprouting);GO:0048671(negative …	NA	NA	NA	NA	interferon related developmental regulator 1 [Source:HGNC Symbol;Acc:HGNC:5456]	protein_coding;retained_intron;nonsense_mediated_decay	DOID:0050161(lower_respiratory_tract_disease);DOID:0050177(monogenic_disease);DOID:0050737(autosomal_recessive_disease);DOID:0050739(autosomal_genetic_disease);DOID:1485(cystic_fibrosis);DOID:1579(respiratory_system_disease);DOID:4(disease);DOID:630(genetic_disease);DOID:7(disease_of_anatomical_entity);DOID:850(lung_disease)	NA	2.98905	14.6078	0.204621	-2.28898	2.59654e-25	2.59005e-23	down	yes
ENSG00000136244	IL6	3569	ENST00000485300;ENST00000258743;ENST00000464710;ENST00000401651;ENST00000426291;ENST00000407492;ENST00000406575	GO:0001781(neutrophil apoptotic process);GO:0002314(germinal center B cell differentiation);GO:0002384(hepatic immune response);GO:0002446(neutrophil mediated immunity);GO:0002548(monocyte chemotaxis);GO:0002639(positive regulation of immunoglobulin production);GO:0002675(positive regulation of acute inflammatory response);GO:0002690(positive regulation of leukocyte chemotaxis);GO:0005102(signali…	01521(EGFR tyrosine kinase inhibitor resistance);01523(Antifolate resistance);04060(Cytokine-cytokine receptor interaction);04061(Viral protein interaction with cytokine and cytokine receptor);04066(HIF-1 signaling pathway);04068(FoxO signaling pathway);04151(PI3K-Akt signaling pathway);04218(Cellular senescence);04620(Toll-like receptor signaling pathway);04621(NOD-like receptor signaling pathwa…	NA	NA	NA	interleukin 6 [Source:HGNC Symbol;Acc:HGNC:6018]	protein_coding;retained_intron	DOID:0014667(disease_of_metabolism);DOID:0050013(carbohydrate_metabolism_disease);DOID:0050117(disease_by_infectious_agent);DOID:0050136(systemic_mycosis);DOID:0050155(sensory_system_disease);DOID:0050161(lower_respiratory_tract_disease);DOID:0050177(monogenic_disease);DOID:0050338(primary_bacterial_infectious_disease);DOID:0050339(commensal_bacterial_infectious_disease);DOID:0050589(inflammatory…	R-HSA-1067640(IL6 binds IL6R-2);R-HSA-1067651(IL6:IL6R-2 binds IL6ST:JAK1, JAK2, (TYK2));R-HSA-1067659(Assembly of hexameric IL-6 receptor);R-HSA-1067667(IL6 binds IL6R);R-HSA-1067676(IL6:IL6R-2 binds IL6ST-2);R-HSA-1067688(IL6:IL6R binds IL6ST:JAK1,JAK2,(TYK2));R-HSA-109857(MAP2K1 binds MAPK3);R-HSA-109858(MAP2K2 binds MAPK1);R-HSA-1112510(IL6ST is tyrosine phosphorylated);R-HSA-1112514(JAK acti…	7.98701	38.6668	0.20656	-2.27537	3.18025e-25	3.14771e-23	down	yes
ENSG00000100162	CENPM	79019	ENST00000215980;ENST00000402420;ENST00000404067;ENST00000402338;ENST00000460824;ENST00000407253;ENST00000396437	GO:0000775(chromosome, centromeric region);GO:0000776(kinetochore);GO:0005634(nucleus);GO:0005654(nucleoplasm);GO:0005694(chromosome);GO:0005737(cytoplasm);GO:0005829(cytosol);GO:0005829(cytosol)	NA	NA	NA	NA	centromere protein M [Source:HGNC Symbol;Acc:HGNC:18352]	protein_coding;retained_intron	NA	R-HSA-141409(Mad1 binds kinetochore);R-HSA-141422(MAD2 converted to an inhibitory state via interaction with Mad1);R-HSA-141431(MAD2 associates with the Mad1 kinetochore complex);R-HSA-141439(Release of activated MAD2 from kinetochores);R-HSA-1638803(Phosphorylation of cohesin by PLK1 at centromeres);R-HSA-1638821(PP2A-B56 dephosphorylates centromeric cohesin);R-HSA-2467809(ESPL1 (Separase) cleav…	35.1479	7.38884	4.75689	2.25002	3.43361e-25	3.37233e-23	up	yes
ENSG00000110446	SLC15A3	51296	ENST00000227880;ENST00000541505;ENST00000543406;ENST00000538739;ENST00000540272;ENST00000681015;ENST00000544101	GO:0002376(immune system process);GO:0005515(protein binding);GO:0005764(lysosome);GO:0005765(lysosomal membrane);GO:0005768(endosome);GO:0006811(ion transport);GO:0010008(endosome membrane);GO:0015031(protein transport);GO:0015293(symporter activity);GO:0015333(peptide:proton symporter activity);GO:0015647(peptidoglycan transmembrane transporter activity);GO:0015833(peptide transport);GO:0015835…	NA	NA	NA	NA	solute carrier family 15 member 3 [Source:HGNC Symbol;Acc:HGNC:18068]	protein_coding;nonsense_mediated_decay;retained_intron	NA	R-HSA-428007(Proton-coupled histidine and di-peptide cotransport)	1.19777	6.12181	0.195656	-2.35361	4.10744e-25	4.00334e-23	down	yes
ENSG00000115902	SLC1A4	6509	ENST00000234256;ENST00000480594;ENST00000531327;ENST00000493121	GO:0005254(chloride channel activity);GO:0005813(centrosome);GO:0005882(intermediate filament);GO:0005886(plasma membrane);GO:0005887(integral component of plasma membrane);GO:0006865(amino acid transport);GO:0006868(glutamine transport);GO:0008514(organic anion transmembrane transporter activity);GO:0009986(cell surface);GO:0015171(amino acid transmembrane transporter activity);GO:0015175(neutra…	NA	NA	NA	NA	solute carrier family 1 member 4 [Source:HGNC Symbol;Acc:HGNC:10942]	protein_coding;retained_intron;processed_transcript	DOID:150(disease_of_mental_health);DOID:1561(cognitive_disorder);DOID:2468(psychotic_disorder);DOID:4(disease);DOID:5419(schizophrenia)	R-HSA-352347(SLC1A4-mediated exchange of extracellular serine for cytosolic alanine, threonine, or cysteine);R-HSA-352354(SLC1A4-mediated exchange of extracellular cysteine for cytosolic alanine, serine, or threonine);R-HSA-352364(SLC1A4-mediated exchange of extracellular alanine for cytosolic serine, threonine, or cysteine);R-HSA-352371(SLC1A4-mediated exchange of extracellular threonine for cyt…	2.40223	11.7282	0.204826	-2.28753	4.3763e-25	4.23307e-23	down	yes
ENSG00000213853	EMP2	2013	ENST00000359543;ENST00000342147	GO:0000139(Golgi membrane);GO:0001765(membrane raft assembly);GO:0001787(natural killer cell proliferation);GO:0001913(T cell mediated cytotoxicity);GO:0001952(regulation of cell-matrix adhesion);GO:0001954(positive regulation of cell-matrix adhesion);GO:0003093(regulation of glomerular filtration);GO:0005178(integrin binding);GO:0005515(protein binding);GO:0005634(nucleus);GO:0005737(cytoplasm);…	NA	NA	NA	NA	epithelial membrane protein 2 [Source:HGNC Symbol;Acc:HGNC:3334]	protein_coding;retained_intron	DOID:10595(Charcot_Marie_Tooth_disease);DOID:14566(disease_of_cellular_proliferation);DOID:162(cancer);DOID:440(neuromuscular_disease);DOID:4(disease);DOID:7(disease_of_anatomical_entity);DOID:863(nervous_system_disease);DOID:870(neuropathy)	NA	2.72129	0.534	5.09604	2.34938	5.5607e-25	5.33827e-23	up	yes
ENSG00000162073	PAQR4	124222	ENST00000293978;ENST00000318782;ENST00000574988	GO:0016020(membrane);GO:0016021(integral component of membrane);GO:0038023(signaling receptor activity);GO:0038023(signaling receptor activity)	NA	NA	NA	NA	progestin and adipoQ receptor family member 4 [Source:HGNC Symbol;Acc:HGNC:26386]	protein_coding	NA	NA	25.9604	5.61949	4.6197	2.2078	5.67266e-25	5.40511e-23	up	yes
ENSG00000162063	CCNF	899	ENST00000397066;ENST00000293968;ENST00000564333;ENST00000564236;ENST00000569093	GO:0000079(regulation of cyclin-dependent protein serine/threonine kinase activity);GO:0000307(cyclin-dependent protein kinase holoenzyme complex);GO:0000320(re-entry into mitotic cell cycle);GO:0001890(placenta development);GO:0005515(protein binding);GO:0005634(nucleus);GO:0005737(cytoplasm);GO:0005813(centrosome);GO:0005814(centriole);GO:0005829(cytosol);GO:0005856(cytoskeleton);GO:0007049(cel…	NA	NA	NA	NA	cyclin F [Source:HGNC Symbol;Acc:HGNC:1591]	protein_coding;nonsense_mediated_decay;retained_intron	NA	R-HSA-8952618(AcM-UBE2M transfers NEDD8 to CRL1 E3 ubiquitin ligase complex);R-HSA-8952620(NEDD8:AcM-UBE2M binds CRL1 E3 ubiquitin ligase complex);R-HSA-8955241(CAND1 binds cytosolic CRL E3 ubiquitin ligases);R-HSA-8955289(COMMDs displace CAND1 from cytosolic CRL E3 ubiquitin ligase complexes);R-HSA-8956040(COP9 signalosome deneddylates cytosolic CRL E3 ubiquitin ligase complexes);R-HSA-8956200(M…	22.3613	4.91217	4.55223	2.18657	6.50585e-25	6.15309e-23	up	yes
ENSG00000214357	NEURL1B	54492	ENST00000369800	GO:0005515(protein binding);GO:0005737(cytoplasm);GO:0005769(early endosome);GO:0005829(cytosol);GO:0007219(Notch signaling pathway);GO:0015629(actin cytoskeleton);GO:0016567(protein ubiquitination);GO:0016740(transferase activity);GO:0046872(metal ion binding);GO:0061630(ubiquitin protein ligase activity);GO:0070086(ubiquitin-dependent endocytosis)	NA	K01931	EC:2.3.2.27	NA	neuralized E3 ubiquitin protein ligase 1B [Source:HGNC Symbol;Acc:HGNC:35422]	protein_coding	NA	R-HSA-1980074(Ubiquitination of DLL/JAG ligands upon binding to NOTCH1);R-HSA-2172172(Ubiquitination of DLL/JAG ligands upon binding to NOTCH2);R-HSA-2737728(Ubiquitination of DLL/JAG ligands upon binding to NOTCH1 HD domain mutants);R-HSA-2769007(Ubiquitination of DLL/JAG ligands upon binding to NOTCH1 PEST domain mutants);R-HSA-2900765(Ubiquitination of DLL/JAG ligands upon binding to NOTCH1 HD…	2.29603	0.421923	5.44183	2.44409	6.63032e-25	6.2247e-23	up	yes
ENSG00000182326	C1S	716	ENST00000328916;ENST00000360817;ENST00000543187;ENST00000497061;ENST00000489541;ENST00000463798;ENST00000488701;ENST00000698564;ENST00000403949;ENST00000402681;ENST00000470326;ENST00000698563;ENST00000473545;ENST00000461983	GO:0002376(immune system process);GO:0004175(endopeptidase activity);GO:0004252(serine-type endopeptidase activity);GO:0005509(calcium ion binding);GO:0005515(protein binding);GO:0005576(extracellular region);GO:0005615(extracellular space);GO:0006508(proteolysis);GO:0006956(complement activation);GO:0006958(complement activation, classical pathway);GO:0008233(peptidase activity);GO:0008236(serin…	04610(Complement and coagulation cascades);05133(Pertussis);05150(Staphylococcus aureus infection);05171(Coronavirus disease - COVID-19);05322(Systemic lupus erythematosus);05322(Systemic lupus erythematosus)	K01331	EC:3.4.21.42	NA	complement C1s [Source:HGNC Symbol;Acc:HGNC:1247]	protein_coding;retained_intron	NA	R-HSA-166753(Conversion of C4 into C4a and C4b);R-HSA-166792(Conversion of C2 into C2a and C2b);R-HSA-173626(Activation of C1r);R-HSA-173631(Activation of C1s);R-HSA-8852266(C1-Inh binds Antigen: antibody: C1 complex activated C1r, C1s);R-HSA-8852481(Antigen:IgG:C1Q:2xActivated C1R:SERPING1:2xActivated C1S:SERPING1 dissociates);R-HSA-9021306(C1-Inh binds and inactivates C1r, C1s)	1.29007	6.47053	0.199376	-2.32644	6.89322e-25	6.42428e-23	down	yes
ENSG00000117016	RIMS3	9783	ENST00000372684	GO:0005515(protein binding);GO:0006836(neurotransmitter transport);GO:0006887(exocytosis);GO:0016020(membrane);GO:0017156(calcium-ion regulated exocytosis);GO:0030054(cell junction);GO:0031267(small GTPase binding);GO:0042391(regulation of membrane potential);GO:0042734(presynaptic membrane);GO:0044325(transmembrane transporter binding);GO:0045202(synapse);GO:0048167(regulation of synaptic plasti…	NA	NA	NA	NA	regulating synaptic membrane exocytosis 3 [Source:HGNC Symbol;Acc:HGNC:21292]	protein_coding	DOID:150(disease_of_mental_health);DOID:1561(cognitive_disorder);DOID:2468(psychotic_disorder);DOID:4(disease);DOID:5419(schizophrenia)	NA	1.62288	0.284319	5.70795	2.51297	9.68432e-25	8.9601e-23	up	yes
ENSG00000087586	AURKA	6790	ENST00000456249;ENST00000347343;ENST00000312783;ENST00000451915;ENST00000441357;ENST00000395915;ENST00000420474;ENST00000395907;ENST00000395913;ENST00000395911;ENST00000422322;ENST00000371356;ENST00000395914	GO:0000086(G2/M transition of mitotic cell cycle);GO:0000166(nucleotide binding);GO:0000212(meiotic spindle organization);GO:0000226(microtubule cytoskeleton organization);GO:0000278(mitotic cell cycle);GO:0000922(spindle pole);GO:0004672(protein kinase activity);GO:0004674(protein serine/threonine kinase activity);GO:0004712(protein serine/threonine/tyrosine kinase activity);GO:0005515(protein b…	04114(Oocyte meiosis);04914(Progesterone-mediated oocyte maturation);04914(Progesterone-mediated oocyte maturation)	K11481	EC:2.7.11.1	NA	aurora kinase A [Source:HGNC Symbol;Acc:HGNC:11393]	protein_coding	DOID:0050177(monogenic_disease);DOID:0050686(organ_system_cancer);DOID:0050687(cell_type_cancer);DOID:0050736(autosomal_dominant_disease);DOID:0050739(autosomal_genetic_disease);DOID:0060083(immune_system_cancer);DOID:0070004(myeloma);DOID:1036(chronic_leukemia);DOID:1037(lymphoblastic_leukemia);DOID:1040(chronic_lymphocytic_leukemia);DOID:11054(urinary_bladder_cancer);DOID:1115(sarcoma);DOID:119…	R-HSA-174088(Association of cell cycle proteins with the APC/C:Cdh1 complex);R-HSA-174105(Degradation of multiubiquitinated cell cycle proteins);R-HSA-174195(Ubiquitination of cell cycle proteins targeted by the APC/C:Cdh1complex);R-HSA-2574840(AJUBA facilitates AURKA autophosphorylation);R-HSA-2574845(AJUBA binds centrosome-associated AURKA);R-HSA-3000310(AURKA phosphorylates PLK1);R-HSA-3000319…	71.6077	15.9409	4.49207	2.16738	1.06977e-24	9.82653e-23	up	yes
ENSG00000105173	CCNE1	898	ENST00000262643;ENST00000357943;ENST00000574121;ENST00000444983;ENST00000576532;ENST00000575243	GO:0000079(regulation of cyclin-dependent protein serine/threonine kinase activity);GO:0000082(G1/S transition of mitotic cell cycle);GO:0000122(negative regulation of transcription by RNA polymerase II);GO:0000307(cyclin-dependent protein kinase holoenzyme complex);GO:0000723(telomere maintenance);GO:0005515(protein binding);GO:0005634(nucleus);GO:0005654(nucleoplasm);GO:0005737(cytoplasm);GO:00…	04110(Cell cycle);04114(Oocyte meiosis);04115(p53 signaling pathway);04151(PI3K-Akt signaling pathway);04218(Cellular senescence);04934(Cushing syndrome);05161(Hepatitis B);05162(Measles);05165(Human papillomavirus infection);05166(Human T-cell leukemia virus 1 infection);05169(Epstein-Barr virus infection);05200(Pathways in cancer);05203(Viral carcinogenesis);05206(MicroRNAs in cancer);05215(Pro…	NA	NA	NA	cyclin E1 [Source:HGNC Symbol;Acc:HGNC:1589]	protein_coding;retained_intron	DOID:0050155(sensory_system_disease);DOID:0050615(respiratory_system_cancer);DOID:0050686(organ_system_cancer);DOID:0050687(cell_type_cancer);DOID:0060083(immune_system_cancer);DOID:0060100(musculoskeletal_system_cancer);DOID:0060116(sensory_system_cancer);DOID:1115(sarcoma);DOID:120(female_reproductive_organ_cancer);DOID:1240(leukemia);DOID:12603(acute_leukemia);DOID:1324(lung_cancer);DOID:14566…	R-HSA-1363303(p130 (RBL2) in complex with E2F4/5:DP1/2 binds to cyclin E/A:CDK2);R-HSA-1363306(p130 (RBL2) binds Cyclin E/A:CDK2);R-HSA-1363311(p107 (RBL1) in complex with E2F4:DP1/2 binds to cyclin E/A:CDK2);R-HSA-1363314(p107 (RBL1) binds CyclinE/A:CDK2);R-HSA-157906(Translocation of Cyclin E:Cdk2 complex to the nucleus);R-HSA-187520(Cyclin E/A:Cdk2-mediated phosphorylation of p27/p21);R-HSA-18…	14.1186	2.92864	4.82088	2.2693	1.29498e-24	1.18102e-22	up	yes
ENSG00000101057	MYBL2	4605	ENST00000217026;ENST00000396863	GO:0000278(mitotic cell cycle);GO:0000978(RNA polymerase II cis-regulatory region sequence-specific DNA binding);GO:0000981(DNA-binding transcription factor activity, RNA polymerase II-specific);GO:0001228(DNA-binding transcription activator activity, RNA polymerase II-specific);GO:0003677(DNA binding);GO:0005515(protein binding);GO:0005634(nucleus);GO:0005654(nucleoplasm);GO:0006355(regulation o…	04218(Cellular senescence);04218(Cellular senescence)	NA	NA	MYB	MYB proto-oncogene like 2 [Source:HGNC Symbol;Acc:HGNC:7548]	protein_coding	DOID:0050686(organ_system_cancer);DOID:11054(urinary_bladder_cancer);DOID:1192(peripheral_nervous_system_neoplasm);DOID:14566(disease_of_cellular_proliferation);DOID:162(cancer);DOID:2621(autonomic_nervous_system_neoplasm);DOID:3093(nervous_system_cancer);DOID:3119(gastrointestinal_system_cancer);DOID:3571(liver_cancer);DOID:3996(urinary_system_cancer);DOID:4007(bladder_carcinoma);DOID:4(disease)…	R-HSA-4088298(FOXM1 stimulates CCNB1 transcription);R-HSA-4088299(FOXM1 stimulates CCNB2 transcription);R-HSA-4088305(FOXM1 stimulates PLK1 transcription);R-HSA-4088306(FOXM1 binds PLK1 promoter);R-HSA-4088307(FOXM1 binds CCNB1 promoter);R-HSA-4088309(FOXM1 binds CCNB2 promoter);R-HSA-8869566(The MYBL2 gene expression is repressed by the complex of NPM1 and TFAP2A homodimer);R-HSA-8978926(MYBL2 g…	166.375	37.4445	4.44325	2.15162	1.48616e-24	1.34577e-22	up	yes
ENSG00000134057	CCNB1	891	ENST00000256442;ENST00000506572;ENST00000503507;ENST00000513102;ENST00000507798;ENST00000508407;ENST00000505500	GO:0000079(regulation of cyclin-dependent protein serine/threonine kinase activity);GO:0000086(G2/M transition of mitotic cell cycle);GO:0000307(cyclin-dependent protein kinase holoenzyme complex);GO:0000922(spindle pole);GO:0000940(outer kinetochore);GO:0001701(in utero embryonic development);GO:0005113(patched binding);GO:0005515(protein binding);GO:0005634(nucleus);GO:0005654(nucleoplasm);GO:0…	04068(FoxO signaling pathway);04110(Cell cycle);04114(Oocyte meiosis);04115(p53 signaling pathway);04218(Cellular senescence);04914(Progesterone-mediated oocyte maturation);05170(Human immunodeficiency virus 1 infection);05170(Human immunodeficiency virus 1 infection)	NA	NA	NA	cyclin B1 [Source:HGNC Symbol;Acc:HGNC:1579]	protein_coding;nonsense_mediated_decay;retained_intron	DOID:0050615(respiratory_system_cancer);DOID:0050686(organ_system_cancer);DOID:0050687(cell_type_cancer);DOID:0060083(immune_system_cancer);DOID:10283(prostate_cancer);DOID:1107(esophageal_carcinoma);DOID:1240(leukemia);DOID:1324(lung_cancer);DOID:14566(disease_of_cellular_proliferation);DOID:1612(breast_cancer);DOID:162(cancer);DOID:170(endocrine_gland_cancer);DOID:171(neuroectodermal_tumor);DOI…	R-HSA-113638(Association of Cyclin B/Cdk1 with replicative origin inhibits pre-RC formation);R-HSA-170044(Translocation of Cyclin B1:phospho-Cdc2 complexes to the nucleus);R-HSA-170055(Myt-1 mediated phosphorylation of Cyclin B:Cdc2 complexes);R-HSA-170057(Formation of Cyclin B:Cdc2 complexes);R-HSA-170070(Wee1-mediated phosphorylation of Cyclin B1:phospho-Cdc2 complexes);R-HSA-170072(Translocati…	152.381	34.3556	4.4354	2.14906	1.79337e-24	1.60173e-22	up	yes
ENSG00000133639	BTG1	694	ENST00000256015;ENST00000673901;ENST00000552315	GO:0003712(transcription coregulator activity);GO:0005515(protein binding);GO:0005634(nucleus);GO:0005654(nucleoplasm);GO:0005737(cytoplasm);GO:0006355(regulation of DNA-templated transcription);GO:0008285(negative regulation of cell population proliferation);GO:0016477(cell migration);GO:0019899(enzyme binding);GO:0019900(kinase binding);GO:0030308(negative regulation of cell growth);GO:0045603(…	03018(RNA degradation);03018(RNA degradation)	NA	NA	NA	BTG anti-proliferation factor 1 [Source:HGNC Symbol;Acc:HGNC:1130]	protein_coding;processed_transcript	DOID:0050686(organ_system_cancer);DOID:0060083(immune_system_cancer);DOID:1037(lymphoblastic_leukemia);DOID:1240(leukemia);DOID:14566(disease_of_cellular_proliferation);DOID:162(cancer);DOID:2531(hematologic_cancer);DOID:4(disease)	R-HSA-9620915(BTG1 gene expression is stimulated by FOXO3)	4.98324	23.611	0.211056	-2.2443	1.79391e-24	1.60173e-22	down	yes
ENSG00000159403	C1R	715	ENST00000647956;ENST00000545466;ENST00000540242;ENST00000536092;ENST00000540610;ENST00000540394;ENST00000602298	GO:0002376(immune system process);GO:0004252(serine-type endopeptidase activity);GO:0005509(calcium ion binding);GO:0005576(extracellular region);GO:0006508(proteolysis);GO:0006956(complement activation);GO:0006958(complement activation, classical pathway);GO:0008233(peptidase activity);GO:0008236(serine-type peptidase activity);GO:0016787(hydrolase activity);GO:0045087(innate immune response);GO…	04145(Phagosome);04610(Complement and coagulation cascades);05133(Pertussis);05150(Staphylococcus aureus infection);05171(Coronavirus disease - COVID-19);05322(Systemic lupus erythematosus);05322(Systemic lupus erythematosus)	K01330	EC:3.4.21.41	NA	complement C1r [Source:HGNC Symbol;Acc:HGNC:1246]	protein_coding;retained_intron	DOID:10652(Alzheimer's_disease);DOID:1289(neurodegenerative_disease);DOID:1307(dementia);DOID:150(disease_of_mental_health);DOID:1561(cognitive_disorder);DOID:331(central_nervous_system_disease);DOID:4(disease);DOID:680(tauopathy);DOID:7(disease_of_anatomical_entity);DOID:863(nervous_system_disease)	R-HSA-166753(Conversion of C4 into C4a and C4b);R-HSA-166792(Conversion of C2 into C2a and C2b);R-HSA-173626(Activation of C1r);R-HSA-173631(Activation of C1s);R-HSA-8852266(C1-Inh binds Antigen: antibody: C1 complex activated C1r, C1s);R-HSA-8852481(Antigen:IgG:C1Q:2xActivated C1R:SERPING1:2xActivated C1S:SERPING1 dissociates);R-HSA-9021306(C1-Inh binds and inactivates C1r, C1s)	1.74671	8.61792	0.202684	-2.3027	1.84969e-24	1.64006e-22	down	yes
ENSG00000138166	DUSP5	1847	ENST00000369583;ENST00000468749	GO:0000165(MAPK cascade);GO:0001706(endoderm formation);GO:0004721(phosphoprotein phosphatase activity);GO:0004722(protein serine/threonine phosphatase activity);GO:0004725(protein tyrosine phosphatase activity);GO:0005515(protein binding);GO:0005634(nucleus);GO:0005654(nucleoplasm);GO:0005737(cytoplasm);GO:0006470(protein dephosphorylation);GO:0008138(protein tyrosine/serine/threonine phosphatas…	04010(MAPK signaling pathway);04010(MAPK signaling pathway)	K04459	EC:3.1.3.16;EC:3.1.3.48	NA	dual specificity phosphatase 5 [Source:HGNC Symbol;Acc:HGNC:3071]	protein_coding;processed_transcript	DOID:14566(disease_of_cellular_proliferation);DOID:162(cancer);DOID:4(disease)	R-HSA-5675373(Nuclear DUSPs dephosphorylate MAPKs)	28.4997	132.899	0.214445	-2.22132	2.01957e-24	1.77833e-22	down	yes
ENSG00000104738	MCM4	4173	ENST00000649838;ENST00000649973;ENST00000262105;ENST00000697123;ENST00000518680;ENST00000650216;ENST00000648554;ENST00000520637;ENST00000519170;ENST00000521151;ENST00000697120;ENST00000520994;ENST00000523853;ENST00000521261;ENST00000648519;ENST00000519138;ENST00000517709	GO:0000166(nucleotide binding);GO:0000727(double-strand break repair via break-induced replication);GO:0000781(chromosome, telomeric region);GO:0003677(DNA binding);GO:0003678(DNA helicase activity);GO:0003697(single-stranded DNA binding);GO:0004386(helicase activity);GO:0005515(protein binding);GO:0005524(ATP binding);GO:0005634(nucleus);GO:0005654(nucleoplasm);GO:0005694(chromosome);GO:0006259(…	03030(DNA replication);04110(Cell cycle);04110(Cell cycle)	K02212	EC:3.6.4.12	NA	minichromosome maintenance complex component 4 [Source:HGNC Symbol;Acc:HGNC:6947]	protein_coding;retained_intron;processed_transcript;nonsense_mediated_decay	DOID:12554(hemolytic_uremic_syndrome);DOID:14566(disease_of_cellular_proliferation);DOID:162(cancer);DOID:2355(anemia);DOID:2914(immune_system_disease);DOID:4(disease);DOID:583(hemolytic_anemia);DOID:720(normocytic_anemia);DOID:74(hematopoietic_system_disease);DOID:7(disease_of_anatomical_entity)	R-HSA-169468(MCM2-7 mediated fork unwinding);R-HSA-176298(Activation of claspin);R-HSA-176318(Loading of claspin onto DNA during replication origin firing);R-HSA-176942(Multiple proteins are localized at replication fork);R-HSA-68914(DNA polymerase alpha:primase binds at the origin);R-HSA-68916(DNA Replication Factor A (RPA) associates with the pre-replicative complex at the origin);R-HSA-68917(C…	36.7852	8.30679	4.42832	2.14676	2.16162e-24	1.89038e-22	up	yes
ENSG00000129195	PIMREG	54478	ENST00000571373;ENST00000250056;ENST00000571572;ENST00000572447;ENST00000573385;ENST00000570337;ENST00000572595;ENST00000576056;ENST00000573557	GO:0005515(protein binding);GO:0005634(nucleus);GO:0005654(nucleoplasm);GO:0005730(nucleolus);GO:0007049(cell cycle);GO:0051301(cell division);GO:0051301(cell division)	NA	NA	NA	NA	PICALM interacting mitotic regulator [Source:HGNC Symbol;Acc:HGNC:25483]	protein_coding;retained_intron;nonsense_mediated_decay	NA	NA	67.0956	15.0938	4.44525	2.15226	2.31938e-24	2.01437e-22	up	yes
ENSG00000164611	PTTG1	9232	ENST00000520452;ENST00000352433;ENST00000393964;ENST00000517480;ENST00000519287;ENST00000524244;ENST00000523659	GO:0004869(cysteine-type endopeptidase inhibitor activity);GO:0005515(protein binding);GO:0005634(nucleus);GO:0005737(cytoplasm);GO:0005829(cytosol);GO:0006281(DNA repair);GO:0006974(cellular response to DNA damage stimulus);GO:0007049(cell cycle);GO:0007059(chromosome segregation);GO:0007283(spermatogenesis);GO:0010951(negative regulation of endopeptidase activity);GO:0017124(SH3 domain binding)…	04110(Cell cycle);04114(Oocyte meiosis);05166(Human T-cell leukemia virus 1 infection);05166(Human T-cell leukemia virus 1 infection)	NA	NA	NA	PTTG1 regulator of sister chromatid separation, securin [Source:HGNC Symbol;Acc:HGNC:9690]	protein_coding;processed_transcript;retained_intron	DOID:0050686(organ_system_cancer);DOID:0050687(cell_type_cancer);DOID:0060072(benign_neoplasm);DOID:0060083(immune_system_cancer);DOID:0060084(cell_type_benign_neoplasm);DOID:0060085(organ_system_benign_neoplasm);DOID:0060089(endocrine_organ_benign_neoplasm);DOID:0060100(musculoskeletal_system_cancer);DOID:0070004(myeloma);DOID:127(leiomyoma);DOID:14566(disease_of_cellular_proliferation);DOID:161…	R-HSA-174088(Association of cell cycle proteins with the APC/C:Cdh1 complex);R-HSA-174105(Degradation of multiubiquitinated cell cycle proteins);R-HSA-174121(Association of Securin with Cdc20:APC/C complex);R-HSA-174144(Ubiquitination of Securin by phospho-APC/C:Cdc20 complex);R-HSA-174195(Ubiquitination of cell cycle proteins targeted by the APC/C:Cdh1complex);R-HSA-174202(Degradation of multiub…	65.8305	14.7265	4.47021	2.16034	2.33496e-24	2.01437e-22	up	yes
ENSG00000029993	HMGB3	3149	ENST00000325307;ENST00000455596;ENST00000430118;ENST00000448905	GO:0000400(four-way junction DNA binding);GO:0002376(immune system process);GO:0003677(DNA binding);GO:0003690(double-stranded DNA binding);GO:0003723(RNA binding);GO:0005515(protein binding);GO:0005634(nucleus);GO:0005694(chromosome);GO:0005737(cytoplasm);GO:0006310(DNA recombination);GO:0006357(regulation of transcription by RNA polymerase II);GO:0008301(DNA binding, bending);GO:0032392(DNA geo…	NA	NA	NA	HMG	high mobility group box 3 [Source:HGNC Symbol;Acc:HGNC:5004]	protein_coding	NA	NA	10.7239	2.29263	4.67757	2.22576	3.05143e-24	2.61481e-22	up	yes
ENSG00000166851	PLK1	5347	ENST00000562272;ENST00000300093;ENST00000564794;ENST00000562407;ENST00000568568;ENST00000564947;ENST00000570220	GO:0000070(mitotic sister chromatid segregation);GO:0000086(G2/M transition of mitotic cell cycle);GO:0000122(negative regulation of transcription by RNA polymerase II);GO:0000132(establishment of mitotic spindle orientation);GO:0000166(nucleotide binding);GO:0000278(mitotic cell cycle);GO:0000281(mitotic cytokinesis);GO:0000287(magnesium ion binding);GO:0000775(chromosome, centromeric region);GO…	04068(FoxO signaling pathway);04110(Cell cycle);04114(Oocyte meiosis);04914(Progesterone-mediated oocyte maturation);04914(Progesterone-mediated oocyte maturation)	K06631	EC:2.7.11.21	NA	polo like kinase 1 [Source:HGNC Symbol;Acc:HGNC:9077]	retained_intron;protein_coding;nonsense_mediated_decay	DOID:0050117(disease_by_infectious_agent);DOID:0050155(sensory_system_disease);DOID:0050177(monogenic_disease);DOID:0050686(organ_system_cancer);DOID:0050687(cell_type_cancer);DOID:0050736(autosomal_dominant_disease);DOID:0050737(autosomal_recessive_disease);DOID:0050739(autosomal_genetic_disease);DOID:0060071(pre_malignant_neoplasm);DOID:0060083(immune_system_cancer);DOID:0060116(sensory_system_…	R-HSA-141409(Mad1 binds kinetochore);R-HSA-141422(MAD2 converted to an inhibitory state via interaction with Mad1);R-HSA-141431(MAD2 associates with the Mad1 kinetochore complex);R-HSA-141439(Release of activated MAD2 from kinetochores);R-HSA-156673(Regulation of KIF23 (MKLP1) by phosphorylation);R-HSA-156678(Activation of Cdc25C);R-HSA-156682(PLK1 phosphorylates NUDC);R-HSA-156699(Inactivation o…	68.2519	15.5809	4.38048	2.13109	4.20429e-24	3.57869e-22	up	yes
ENSG00000178999	AURKB	9212	ENST00000534871;ENST00000584561;ENST00000585124;ENST00000578549;ENST00000316199;ENST00000582368;ENST00000578753;ENST00000583915;ENST00000580998;ENST00000583124;ENST00000580390;ENST00000577833;ENST00000581511	GO:0000122(negative regulation of transcription by RNA polymerase II);GO:0000166(nucleotide binding);GO:0000278(mitotic cell cycle);GO:0000281(mitotic cytokinesis);GO:0000775(chromosome, centromeric region);GO:0000776(kinetochore);GO:0000779(condensed chromosome, centromeric region);GO:0001934(positive regulation of protein phosphorylation);GO:0002903(negative regulation of B cell apoptotic proce…	NA	K11479	EC:2.7.11.1	NA	aurora kinase B [Source:HGNC Symbol;Acc:HGNC:11390]	protein_coding;retained_intron;nonsense_mediated_decay	DOID:0050615(respiratory_system_cancer);DOID:0050686(organ_system_cancer);DOID:0050687(cell_type_cancer);DOID:0060083(immune_system_cancer);DOID:1115(sarcoma);DOID:1192(peripheral_nervous_system_neoplasm);DOID:120(female_reproductive_organ_cancer);DOID:1240(leukemia);DOID:1324(lung_cancer);DOID:14566(disease_of_cellular_proliferation);DOID:162(cancer);DOID:1749(squamous_cell_carcinoma);DOID:193(r…	R-HSA-141409(Mad1 binds kinetochore);R-HSA-141422(MAD2 converted to an inhibitory state via interaction with Mad1);R-HSA-141431(MAD2 associates with the Mad1 kinetochore complex);R-HSA-141439(Release of activated MAD2 from kinetochores);R-HSA-1638803(Phosphorylation of cohesin by PLK1 at centromeres);R-HSA-1638821(PP2A-B56 dephosphorylates centromeric cohesin);R-HSA-174088(Association of cell cyc…	76.0204	17.3179	4.38971	2.13413	5.93262e-24	5.0164e-22	up	yes
ENSG00000092853	CLSPN	63967	ENST00000318121;ENST00000251195;ENST00000517467;ENST00000373220	GO:0000076(DNA replication checkpoint signaling);GO:0000077(DNA damage checkpoint signaling);GO:0000217(DNA secondary structure binding);GO:0003677(DNA binding);GO:0005515(protein binding);GO:0005634(nucleus);GO:0005654(nucleoplasm);GO:0005794(Golgi apparatus);GO:0006281(DNA repair);GO:0006974(cellular response to DNA damage stimulus);GO:0007049(cell cycle);GO:0007095(mitotic G2 DNA damage checkp…	NA	NA	NA	NA	claspin [Source:HGNC Symbol;Acc:HGNC:19715]	protein_coding;retained_intron	DOID:14566(disease_of_cellular_proliferation);DOID:162(cancer);DOID:4(disease)	R-HSA-176298(Activation of claspin);R-HSA-176318(Loading of claspin onto DNA during replication origin firing);R-HSA-351936(Caspase-mediated cleavage of claspin);R-HSA-5684882(CHEK1 is recruited to resected DNA DSBs);R-HSA-5684887(Activation of CHEK1 at resected DNA DSBs);R-HSA-5696914(USP28 deubiquitinates CLSPN and MYC)	2.11557	0.428519	4.93693	2.30361	8.9226e-24	7.49498e-22	up	yes
ENSG00000123080	CDKN2C	1031	ENST00000262662;ENST00000396148;ENST00000371761	GO:0000079(regulation of cyclin-dependent protein serine/threonine kinase activity);GO:0004861(cyclin-dependent protein serine/threonine kinase inhibitor activity);GO:0005515(protein binding);GO:0005634(nucleus);GO:0005737(cytoplasm);GO:0005829(cytosol);GO:0007049(cell cycle);GO:0008283(cell population proliferation);GO:0008285(negative regulation of cell population proliferation);GO:0016301(kina…	01522(Endocrine resistance);04110(Cell cycle);04934(Cushing syndrome);05166(Human T-cell leukemia virus 1 infection);05202(Transcriptional misregulation in cancer);05202(Transcriptional misregulation in cancer)	NA	NA	NA	cyclin dependent kinase inhibitor 2C [Source:HGNC Symbol;Acc:HGNC:1789]	protein_coding	DOID:0050686(organ_system_cancer);DOID:0050687(cell_type_cancer);DOID:0060058(lymphoma);DOID:0060072(benign_neoplasm);DOID:0060083(immune_system_cancer);DOID:0060084(cell_type_benign_neoplasm);DOID:14566(disease_of_cellular_proliferation);DOID:162(cancer);DOID:170(endocrine_gland_cancer);DOID:171(neuroectodermal_tumor);DOID:1781(thyroid_cancer);DOID:2531(hematologic_cancer);DOID:2994(germ_cell_ca…	R-HSA-182594(Association of INK4 family proteins with CDK4/6);R-HSA-8941895(Formation of CDK4/6:CCND complexes)	22.8845	5.17735	4.42012	2.14409	1.07986e-23	9.01151e-22	up	yes
ENSG00000111445	RFC5	5985	ENST00000454402;ENST00000392542;ENST00000543153;ENST00000484086;ENST00000472603;ENST00000537315;ENST00000420967	GO:0000166(nucleotide binding);GO:0003677(DNA binding);GO:0003689(DNA clamp loader activity);GO:0005515(protein binding);GO:0005524(ATP binding);GO:0005634(nucleus);GO:0005654(nucleoplasm);GO:0005663(DNA replication factor C complex);GO:0006260(DNA replication);GO:0006261(DNA-templated DNA replication);GO:0006281(DNA repair);GO:0016887(ATP hydrolysis activity);GO:0017116(single-stranded DNA helic…	03030(DNA replication);03420(Nucleotide excision repair);03430(Mismatch repair);03430(Mismatch repair)	NA	NA	NA	replication factor C subunit 5 [Source:HGNC Symbol;Acc:HGNC:9973]	protein_coding;processed_transcript;retained_intron	NA	R-HSA-110307(REV1 binds AP-dsDNA);R-HSA-110308(REV1 inserts dCMP opposite to AP sites in DNA);R-HSA-110311(POLZ extends translesion synthesis);R-HSA-110316(POLH binds monoUb:K164-PCNA at damaged TT-CPD-DNA template);R-HSA-110317(Insertion of correct bases opposite the lesion by POLH);R-HSA-110319(Elongation by POLH);R-HSA-110363(FEN1 bound to PCNA and APEX1 cleaves flap ssDNA);R-HSA-110364(PCNA:P…	25.7591	5.85974	4.39595	2.13617	1.09259e-23	9.05854e-22	up	yes
ENSG00000228716	DHFR	1719	ENST00000439211;ENST00000505337;ENST00000513314;ENST00000504396;ENST00000511032	GO:0000900(mRNA regulatory element binding translation repressor activity);GO:0003723(RNA binding);GO:0003729(mRNA binding);GO:0004146(dihydrofolate reductase activity);GO:0005515(protein binding);GO:0005542(folic acid binding);GO:0005737(cytoplasm);GO:0005739(mitochondrion);GO:0005829(cytosol);GO:0006545(glycine biosynthetic process);GO:0006729(tetrahydrobiopterin biosynthetic process);GO:000673…	00670(One carbon pool by folate);00790(Folate biosynthesis);01100(Metabolic pathways);01240(Biosynthesis of cofactors);01523(Antifolate resistance);01523(Antifolate resistance)	K00287	EC:1.5.1.3	NA	dihydrofolate reductase [Source:HGNC Symbol;Acc:HGNC:2861]	protein_coding;retained_intron	DOID:0050686(organ_system_cancer);DOID:0060037(developmental_disorder_of_mental_health);DOID:0060040(pervasive_developmental_disorder);DOID:0060041(autism_spectrum_disorder);DOID:0060083(immune_system_cancer);DOID:0060100(musculoskeletal_system_cancer);DOID:1037(lymphoblastic_leukemia);DOID:1240(leukemia);DOID:12849(autistic_disorder);DOID:13382(megaloblastic_anemia);DOID:14566(disease_of_cellula…	R-HSA-1497794(Salvage - BH2 is reduced to BH4 by DHFR);R-HSA-8961874(DHFR gene expression is stimulated by E2F1);R-HSA-9709098(DHFR dimer reduces FOLA to DHF);R-HSA-9709109(DHFR dimer binds DHFR inhibitors)	10.3289	2.27496	4.54024	2.18277	1.33658e-23	1.101e-21	up	yes
ENSG00000136068	FLNB	2317	ENST00000682871;ENST00000429972;ENST00000358537;ENST00000490882;ENST00000481470;ENST00000684439;ENST00000682868;ENST00000295956;ENST00000419752;ENST00000477629;ENST00000491408;ENST00000682503;ENST00000682097;ENST00000683925;ENST00000468939;ENST00000684607;ENST00000466455;ENST00000682987;ENST00000683511;ENST00000683114;ENST00000470231;ENST00000475487	GO:0001725(stress fiber);GO:0003334(keratinocyte development);GO:0003382(epithelial cell morphogenesis);GO:0003723(RNA binding);GO:0003779(actin binding);GO:0005515(protein binding);GO:0005737(cytoplasm);GO:0005829(cytosol);GO:0005856(cytoskeleton);GO:0005886(plasma membrane);GO:0005903(brush border);GO:0005925(focal adhesion);GO:0005938(cell cortex);GO:0007010(cytoskeleton organization);GO:00071…	04010(MAPK signaling pathway);04510(Focal adhesion);05132(Salmonella infection);05205(Proteoglycans in cancer);05205(Proteoglycans in cancer)	NA	NA	NA	filamin B [Source:HGNC Symbol;Acc:HGNC:3755]	protein_coding;retained_intron;nonsense_mediated_decay	DOID:225(syndrome);DOID:4(disease)	R-HSA-1169398(ISGylation of host protein filamin B)	22.8009	102.513	0.222419	-2.16865	1.4228e-23	1.1645e-21	down	yes
ENSG00000248643	RBM14-RBM4	100526737	ENST00000421355;ENST00000412278;ENST00000511114;ENST00000500635	GO:0003676(nucleic acid binding);GO:0003723(RNA binding);GO:0008270(zinc ion binding);GO:0008270(zinc ion binding)	NA	NA	NA	NA	RBM14-RBM4 readthrough [Source:HGNC Symbol;Acc:HGNC:38840]	nonsense_mediated_decay;protein_coding;processed_transcript	NA	R-HSA-8938356(RMB14 binds RUNX2)	6.65405	1.3228	5.03029	2.33064	1.63848e-23	1.33249e-21	up	yes
ENSG00000101255	TRIB3	57761	ENST00000449710;ENST00000217233;ENST00000422053;ENST00000615226	GO:0000122(negative regulation of transcription by RNA polymerase II);GO:0003714(transcription corepressor activity);GO:0004672(protein kinase activity);GO:0004860(protein kinase inhibitor activity);GO:0005515(protein binding);GO:0005524(ATP binding);GO:0005634(nucleus);GO:0005654(nucleoplasm);GO:0005829(cytosol);GO:0005886(plasma membrane);GO:0006468(protein phosphorylation);GO:0006469(negative …	04931(Insulin resistance);04931(Insulin resistance)	NA	NA	NA	tribbles pseudokinase 3 [Source:HGNC Symbol;Acc:HGNC:16228]	protein_coding	DOID:0014667(disease_of_metabolism);DOID:0050013(carbohydrate_metabolism_disease);DOID:0050828(artery_disease);DOID:0060158(acquired_metabolic_disease);DOID:0080001(bone_disease);DOID:1287(cardiovascular_system_disease);DOID:14566(disease_of_cellular_proliferation);DOID:162(cancer);DOID:178(vascular_disease);DOID:17(musculoskeletal_system_disease);DOID:1936(atherosclerosis);DOID:2348(arterioscler…	R-HSA-109700(AKT2 binds PIP3);R-HSA-198640(TORC2 (mTOR) phosphorylates AKT at S473);R-HSA-1989767(Expression of TRIB3);R-HSA-199443(THEM4 (CTMP) and/or TRIB3 inhibit AKT phosphorylation);R-HSA-9635912(Expression of TRIB3 in response to stress);R-HSA-9653894(Expression of CHAC1)	94.2766	422.589	0.223093	-2.16428	1.79687e-23	1.45205e-21	down	yes
ENSG00000105835	NAMPT	10135	ENST00000680468;ENST00000681550;ENST00000222553;ENST00000354289;ENST00000441045;ENST00000680616;ENST00000463871;ENST00000681223;ENST00000393618;ENST00000679717;ENST00000681297;ENST00000467730;ENST00000486949;ENST00000680516;ENST00000679461;ENST00000681372;ENST00000680482;ENST00000681887;ENST00000681631;ENST00000424768	GO:0004514(nicotinate-nucleotide diphosphorylase (carboxylating) activity);GO:0005125(cytokine activity);GO:0005515(protein binding);GO:0005576(extracellular region);GO:0005615(extracellular space);GO:0005634(nucleus);GO:0005737(cytoplasm);GO:0005829(cytosol);GO:0007165(signal transduction);GO:0007267(cell-cell signaling);GO:0007623(circadian rhythm);GO:0008284(positive regulation of cell populat…	00760(Nicotinate and nicotinamide metabolism);01100(Metabolic pathways);04621(NOD-like receptor signaling pathway);04621(NOD-like receptor signaling pathway)	K03462	EC:2.4.2.12	NA	nicotinamide phosphoribosyltransferase [Source:HGNC Symbol;Acc:HGNC:30092]	protein_coding;retained_intron;nonsense_mediated_decay;processed_transcript	DOID:0014667(disease_of_metabolism);DOID:0050013(carbohydrate_metabolism_disease);DOID:0050117(disease_by_infectious_agent);DOID:0050589(inflammatory_bowel_disease);DOID:0050686(organ_system_cancer);DOID:0050687(cell_type_cancer);DOID:0050828(artery_disease);DOID:0060037(developmental_disorder_of_mental_health);DOID:0060038(specific_developmental_disorder);DOID:0060158(acquired_metabolic_disease)…	R-HSA-1368889(Expression of NAMPT (NamPRT, PBEF, Visfatin));R-HSA-197250(NAMPT transfers PRIB to NAM to form NAMN);R-HSA-9769323(NPAS4 stimulates NAMPT gene expression)	1.26982	5.79229	0.219226	-2.18951	1.84659e-23	1.48285e-21	down	yes
ENSG00000196352	CD55	1604	ENST00000367064;ENST00000314754;ENST00000476590;ENST00000367063;ENST00000695825;ENST00000343420;ENST00000695829;ENST00000618707;ENST00000695827;ENST00000695824;ENST00000695830;ENST00000488171;ENST00000695831;ENST00000695822	GO:0000139(Golgi membrane);GO:0001618(virus receptor activity);GO:0002376(immune system process);GO:0002456(T cell mediated immunity);GO:0002726(positive regulation of T cell cytokine production);GO:0005515(protein binding);GO:0005576(extracellular region);GO:0005886(plasma membrane);GO:0006958(complement activation, classical pathway);GO:0007204(positive regulation of cytosolic calcium ion conce…	04610(Complement and coagulation cascades);04640(Hematopoietic cell lineage);05416(Viral myocarditis);05416(Viral myocarditis)	NA	NA	NA	CD55 molecule (Cromer blood group) [Source:HGNC Symbol;Acc:HGNC:2665]	protein_coding;retained_intron;nonsense_mediated_decay;processed_transcript	DOID:0014667(disease_of_metabolism);DOID:0050615(respiratory_system_cancer);DOID:0050686(organ_system_cancer);DOID:0060050(autoimmune_disease_of_blood);DOID:0060056(hypersensitivity_reaction_disease);DOID:10155(intestinal_cancer);DOID:1168(familial_hyperlipidemia);DOID:12449(aplastic_anemia);DOID:1324(lung_cancer);DOID:14566(disease_of_cellular_proliferation);DOID:1612(breast_cancer);DOID:162(can…	R-HSA-6798743(Exocytosis of secretory granule membrane proteins);R-HSA-6800426(Exocytosis of ficolin-rich granule membrane proteins);R-HSA-6807875(ARFGAP, cargo, v-SNAREs and p24 proteins bind nascent COPI complex);R-HSA-6807877(ARFGAPs stimulate ARF GTPase activity);R-HSA-6809003(ERGIC-to-Golgi vesicles bind dynein:dynactin );R-HSA-6809006(Vesicle is tethered through binding GOLGA2:GORASP1, GOLG…	1.17996	5.55393	0.212455	-2.23477	2.03683e-23	1.62539e-21	down	yes
ENSG00000151012	SLC7A11	23657,682	ENST00000280612;ENST00000509248	GO:0005515(protein binding);GO:0005791(rough endoplasmic reticulum);GO:0005856(cytoskeleton);GO:0005886(plasma membrane);GO:0006749(glutathione metabolic process);GO:0006865(amino acid transport);GO:0006979(response to oxidative stress);GO:0007420(brain development);GO:0008542(visual learning);GO:0009636(response to toxic substance);GO:0009986(cell surface);GO:0014070(response to organic cyclic c…	04216(Ferroptosis);04216(Ferroptosis)	NA	NA	NA	solute carrier family 7 member 11 [Source:HGNC Symbol;Acc:HGNC:11059]	protein_coding;nonsense_mediated_decay	DOID:14566(disease_of_cellular_proliferation);DOID:162(cancer);DOID:331(central_nervous_system_disease);DOID:4724(brain_edema);DOID:4(disease);DOID:7(disease_of_anatomical_entity);DOID:863(nervous_system_disease);DOID:936(brain_disease)	R-HSA-375131(Basigin binds CD98 complex);R-HSA-378513(SLC7A11-mediated exchange of extracellular cysteine and cytosolic glutamate);R-HSA-9761841(AcK-NFE2L2-dependent SLC7A11 expression)	0.380107	1.97139	0.192812	-2.37473	2.08801e-23	1.65589e-21	down	yes
ENSG00000111912	NCOA7	135112	ENST00000368357;ENST00000419660;ENST00000453302;ENST00000417494;ENST00000438495;ENST00000487635;ENST00000229634;ENST00000392477	GO:0005515(protein binding);GO:0005634(nucleus);GO:0006357(regulation of transcription by RNA polymerase II);GO:0006979(response to oxidative stress);GO:0016922(nuclear receptor binding);GO:0030374(nuclear receptor coactivator activity);GO:0045944(positive regulation of transcription by RNA polymerase II);GO:1900408(negative regulation of cellular response to oxidative stress);GO:1902083(negative…	NA	NA	NA	NA	nuclear receptor coactivator 7 [Source:HGNC Symbol;Acc:HGNC:21081]	protein_coding;processed_transcript	NA	NA	0.598535	3.03416	0.197266	-2.34179	2.16648e-23	1.70751e-21	down	yes
ENSG00000104419	NDRG1	10397	ENST00000323851;ENST00000674925;ENST00000675357;ENST00000518094;ENST00000521414;ENST00000517745;ENST00000521438;ENST00000675860;ENST00000674536;ENST00000519278;ENST00000521664;ENST00000676222;ENST00000519228;ENST00000522665;ENST00000518480;ENST00000521026;ENST00000523931;ENST00000675414;ENST00000414097	GO:0005515(protein binding);GO:0005634(nucleus);GO:0005737(cytoplasm);GO:0005813(centrosome);GO:0005815(microtubule organizing center);GO:0005829(cytosol);GO:0005856(cytoskeleton);GO:0005874(microtubule);GO:0005886(plasma membrane);GO:0005912(adherens junction);GO:0007165(signal transduction);GO:0008017(microtubule binding);GO:0008285(negative regulation of cell population proliferation);GO:00100…	NA	NA	NA	NA	N-myc downstream regulated 1 [Source:HGNC Symbol;Acc:HGNC:7679]	protein_coding;retained_intron;processed_transcript	DOID:0050624(gastrointestinal_system_benign_neoplasm);DOID:0050686(organ_system_cancer);DOID:0050687(cell_type_cancer);DOID:0060072(benign_neoplasm);DOID:0060083(immune_system_cancer);DOID:0060085(organ_system_benign_neoplasm);DOID:0060100(musculoskeletal_system_cancer);DOID:10283(prostate_cancer);DOID:10595(Charcot_Marie_Tooth_disease);DOID:1107(esophageal_carcinoma);DOID:1192(peripheral_nervous…	R-HSA-5633314(TP53 stimulates NDRG1 gene expression)	4.48376	20.1682	0.222318	-2.1693	2.48934e-23	1.94993e-21	down	yes
ENSG00000011638	LDAF1	57146	ENST00000233047;ENST00000261388;ENST00000572258;ENST00000573487;ENST00000577162;ENST00000451578	GO:0005515(protein binding);GO:0005783(endoplasmic reticulum);GO:0005789(endoplasmic reticulum membrane);GO:0005811(lipid droplet);GO:0016020(membrane);GO:0016021(integral component of membrane);GO:0140042(lipid droplet formation);GO:0140042(lipid droplet formation)	NA	NA	NA	NA	lipid droplet assembly factor 1 [Source:HGNC Symbol;Acc:HGNC:30136]	protein_coding;nonsense_mediated_decay	NA	NA	2.42296	11.8619	0.204264	-2.29149	2.50593e-23	1.95096e-21	down	yes
ENSG00000143013	LMO4	8543,8048	ENST00000370544;ENST00000370542;ENST00000495705;ENST00000489303	GO:0001843(neural tube closure);GO:0003281(ventricular septum development);GO:0005515(protein binding);GO:0005634(nucleus);GO:0005667(transcription regulator complex);GO:0006357(regulation of transcription by RNA polymerase II);GO:0021514(ventral spinal cord interneuron differentiation);GO:0021522(spinal cord motor neuron differentiation);GO:0021527(spinal cord association neuron differentiation)…	NA	NA	NA	NA	LIM domain only 4 [Source:HGNC Symbol;Acc:HGNC:6644]	protein_coding;processed_transcript	DOID:0050177(monogenic_disease);DOID:0050687(cell_type_cancer);DOID:0050736(autosomal_dominant_disease);DOID:0050739(autosomal_genetic_disease);DOID:14566(disease_of_cellular_proliferation);DOID:162(cancer);DOID:1749(squamous_cell_carcinoma);DOID:305(carcinoma);DOID:4(disease);DOID:5683(hereditary_breast_ovarian_cancer);DOID:630(genetic_disease)	NA	3.24798	14.7736	0.21985	-2.18541	3.73747e-23	2.89212e-21	down	yes
ENSG00000254870	ATP6V1G2-DDX39B	100532737	ENST00000376185	GO:0006811(ion transport);GO:0016471(vacuolar proton-transporting V-type ATPase complex);GO:0046961(proton-transporting ATPase activity, rotational mechanism);GO:1902600(proton transmembrane transport)	NA	NA	NA	NA	ATP6V1G2-DDX39B readthrough (NMD candidate) [Source:HGNC Symbol;Acc:HGNC:41999]	nonsense_mediated_decay	NA	NA	56.4956	13.2472	4.26471	2.09245	3.9534e-23	3.04078e-21	up	yes
ENSG00000188985	DHFRP1	573971,1719	ENST00000579682	NA	NA	NA	NA	NA	dihydrofolate reductase pseudogene 1 [Source:HGNC Symbol;Acc:HGNC:2862]	processed_pseudogene	NA	NA	26.9585	5.38062	5.01029	2.32489	4.13091e-23	3.15829e-21	up	yes
ENSG00000085999	RAD54L	8438,546	ENST00000371975;ENST00000472889;ENST00000459678;ENST00000473251;ENST00000671528;ENST00000668565;ENST00000493985;ENST00000657122;ENST00000664182;ENST00000661701	GO:0000166(nucleotide binding);GO:0000724(double-strand break repair via homologous recombination);GO:0003677(DNA binding);GO:0003678(DNA helicase activity);GO:0004386(helicase activity);GO:0005515(protein binding);GO:0005524(ATP binding);GO:0005634(nucleus);GO:0005654(nucleoplasm);GO:0006281(DNA repair);GO:0006302(double-strand break repair);GO:0006310(DNA recombination);GO:0006338(chromatin rem…	03440(Homologous recombination);03440(Homologous recombination)	NA	NA	NA	RAD54 like [Source:HGNC Symbol;Acc:HGNC:9826]	protein_coding;nonsense_mediated_decay;retained_intron	DOID:0050686(organ_system_cancer);DOID:0060083(immune_system_cancer);DOID:1036(chronic_leukemia);DOID:1240(leukemia);DOID:14566(disease_of_cellular_proliferation);DOID:162(cancer);DOID:2531(hematologic_cancer);DOID:2914(immune_system_disease);DOID:4(disease);DOID:612(primary_immunodeficiency_disease);DOID:627(severe_combined_immunodeficiency);DOID:628(combined_T_cell_and_B_cell_immunodeficiency);…	NA	7.77051	1.69574	4.58237	2.1961	4.4635e-23	3.3815e-21	up	yes
ENSG00000105486	LIG1	3978,26018	ENST00000263274;ENST00000599322;ENST00000595758;ENST00000594067;ENST00000699876;ENST00000596332;ENST00000594759;ENST00000597901;ENST00000699880;ENST00000699879;ENST00000600055;ENST00000699872;ENST00000596457;ENST00000699866;ENST00000542460;ENST00000699878;ENST00000699865;ENST00000596549;ENST00000597146;ENST00000699875	GO:0000166(nucleotide binding);GO:0003677(DNA binding);GO:0003909(DNA ligase activity);GO:0003910(DNA ligase (ATP) activity);GO:0005524(ATP binding);GO:0005634(nucleus);GO:0005654(nucleoplasm);GO:0005737(cytoplasm);GO:0005739(mitochondrion);GO:0006260(DNA replication);GO:0006266(DNA ligation);GO:0006273(lagging strand elongation);GO:0006281(DNA repair);GO:0006284(base-excision repair);GO:0006287(…	03030(DNA replication);03410(Base excision repair);03420(Nucleotide excision repair);03430(Mismatch repair);03430(Mismatch repair)	K10747	EC:6.5.1.1;EC:6.5.1.6;EC:6.5.1.7	NA	DNA ligase 1 [Source:HGNC Symbol;Acc:HGNC:6598]	protein_coding;retained_intron;nonsense_mediated_decay	DOID:0050117(disease_by_infectious_agent);DOID:3298(vaccinia);DOID:4(disease);DOID:934(viral_infectious_disease)	R-HSA-110371(LIG1 binds APEX1 and PCNA at SSB);R-HSA-174456(Joining of adjacent Okazaki fragments of the C-strand);R-HSA-182876(Removal of plus-strand flap and gap closure complete synthesis of linear duplex viral DNA);R-HSA-5358592(DNA ligase I ligates single stranded nick in double stranded DNA);R-HSA-5651773(LIG1 binds POLB at long-patch BER site);R-HSA-5651789(LIG1 bound to POLB ligates SSB);…	8.84341	2.05914	4.29472	2.10256	4.47583e-23	3.3815e-21	up	yes
ENSG00000204682	MIR1915HG	399726	ENST00000658000;ENST00000701218	NA	NA	NA	NA	NA	MIR1915 host gene [Source:HGNC Symbol;Acc:HGNC:31448]	lncRNA	NA	NA	2.59942	0.480356	5.41145	2.43602	4.96132e-23	3.72625e-21	up	yes
ENSG00000123485	HJURP	55355	ENST00000411486;ENST00000432087;ENST00000453122;ENST00000373395	GO:0000775(chromosome, centromeric region);GO:0000776(kinetochore);GO:0003677(DNA binding);GO:0005515(protein binding);GO:0005634(nucleus);GO:0005654(nucleoplasm);GO:0005694(chromosome);GO:0005730(nucleolus);GO:0005739(mitochondrion);GO:0007049(cell cycle);GO:0007059(chromosome segregation);GO:0034080(CENP-A containing chromatin assembly);GO:0042393(histone binding);GO:0042802(identical protein b…	NA	NA	NA	NA	Holliday junction recognition protein [Source:HGNC Symbol;Acc:HGNC:25444]	protein_coding;nonsense_mediated_decay;retained_intron	DOID:14566(disease_of_cellular_proliferation);DOID:162(cancer);DOID:4(disease)	R-HSA-606287(RSF complex binds the centromere);R-HSA-606289(New CENPA-containing nucleosomes are deposited at the centromere);R-HSA-606326(HJURP:CENPA complex localizes to the centromere)	34.5948	8.1687	4.23504	2.08238	6.07643e-23	4.53707e-21	up	yes
ENSG00000183486	MX2	4600	ENST00000435611;ENST00000330714;ENST00000482953;ENST00000680539;ENST00000681171;ENST00000494252;ENST00000496774;ENST00000493753;ENST00000418103;ENST00000416447;ENST00000681460;ENST00000436410;ENST00000474368;ENST00000495892;ENST00000680215;ENST00000398632	GO:0000166(nucleotide binding);GO:0002376(immune system process);GO:0003924(GTPase activity);GO:0005515(protein binding);GO:0005525(GTP binding);GO:0005634(nucleus);GO:0005643(nuclear pore);GO:0005737(cytoplasm);GO:0005829(cytosol);GO:0005874(microtubule);GO:0006952(defense response);GO:0008017(microtubule binding);GO:0009615(response to virus);GO:0015031(protein transport);GO:0016020(membrane);G…	05160(Hepatitis C);05162(Measles);05164(Influenza A);05165(Human papillomavirus infection);05171(Coronavirus disease - COVID-19);05171(Coronavirus disease - COVID-19)	NA	NA	NA	MX dynamin like GTPase 2 [Source:HGNC Symbol;Acc:HGNC:7533]	protein_coding;retained_intron;processed_transcript;nonsense_mediated_decay	DOID:150(disease_of_mental_health);DOID:4(disease);DOID:535(sleep_disorder);DOID:8986(narcolepsy)	R-HSA-1015702(Expression of IFN-induced genes);R-HSA-1169406(ISGylation of host proteins);R-HSA-1678841(Regulation of protein ISGylation by ISG15 deconjugating enzyme USP18)	3.03294	13.4357	0.225737	-2.14729	7.55738e-23	5.61004e-21	down	yes
ENSG00000185818	NAT8L	339983	ENST00000423729	GO:0005515(protein binding);GO:0005737(cytoplasm);GO:0005739(mitochondrion);GO:0005759(mitochondrial matrix);GO:0005783(endoplasmic reticulum);GO:0008080(N-acetyltransferase activity);GO:0009066(aspartate family amino acid metabolic process);GO:0016020(membrane);GO:0016021(integral component of membrane);GO:0016407(acetyltransferase activity);GO:0016740(transferase activity);GO:0016746(acyltransf…	00250(Alanine, aspartate and glutamate metabolism);01100(Metabolic pathways)	K18309	EC:2.3.1.17	NA	N-acetyltransferase 8 like [Source:HGNC Symbol;Acc:HGNC:26742]	protein_coding	NA	R-HSA-8954468(NAT8L transfers acetyl group from Ac-CoA to L-Asp, forming NAA)	2.61164	11.6934	0.223344	-2.16266	1.13935e-22	8.40878e-21	down	yes
ENSG00000106268	NUDT1	4521	ENST00000356714;ENST00000339737;ENST00000397048;ENST00000397049;ENST00000487426;ENST00000343985;ENST00000397046;ENST00000471348;ENST00000454650	GO:0001669(acrosomal vesicle);GO:0003723(RNA binding);GO:0005515(protein binding);GO:0005615(extracellular space);GO:0005634(nucleus);GO:0005737(cytoplasm);GO:0005739(mitochondrion);GO:0005759(mitochondrial matrix);GO:0005829(cytosol);GO:0005886(plasma membrane);GO:0006152(purine nucleoside catabolic process);GO:0006281(DNA repair);GO:0006979(response to oxidative stress);GO:0007568(aging);GO:000…	NA	K17816	EC:3.6.1.55;EC:3.6.1.56	NA	nudix hydrolase 1 [Source:HGNC Symbol;Acc:HGNC:8048]	protein_coding;processed_transcript	DOID:0014667(disease_of_metabolism);DOID:0050013(carbohydrate_metabolism_disease);DOID:0050615(respiratory_system_cancer);DOID:0050686(organ_system_cancer);DOID:0060158(acquired_metabolic_disease);DOID:10283(prostate_cancer);DOID:1324(lung_cancer);DOID:14566(disease_of_cellular_proliferation);DOID:162(cancer);DOID:193(reproductive_organ_cancer);DOID:3856(male_reproductive_organ_cancer);DOID:3905(…	R-HSA-2395818(NUDT1 hydrolyses 2-oxo-dATP to 2-oxo-dAMP);R-HSA-2395849(NUDT1 hydrolyses 8-oxo-dGTP to 8-oxo-dGMP);R-HSA-2395872(NUDT1 hydrolyses 2-oxo-ATP to 2-oxo-AMP);R-HSA-9731228(NUDT1 hydrolyses 8-oxo-dATP to 8-oxo-dAMP);R-HSA-9731590(NUDT1 hydrolyzes O6-methyl-dGTP to O6-methyl-dGMP);R-HSA-9731613(NUDT1 hydrolyzes N6-methyl-dATP to N6-methyl-dAMP);R-HSA-9731632(NUDT1 hydrolyzes N6-methyl-AT…	18.0794	4.07833	4.43303	2.14829	1.27784e-22	9.37673e-21	up	yes
ENSG00000164976	MYORG	57462	ENST00000297625	GO:0004553(hydrolase activity, hydrolyzing O-glycosyl compounds);GO:0005634(nucleus);GO:0005783(endoplasmic reticulum);GO:0005789(endoplasmic reticulum membrane);GO:0005975(carbohydrate metabolic process);GO:0008152(metabolic process);GO:0016020(membrane);GO:0016021(integral component of membrane);GO:0016787(hydrolase activity);GO:0016798(hydrolase activity, acting on glycosyl bonds);GO:0031965(n…	NA	NA	NA	NA	myogenesis regulating glycosidase (putative) [Source:HGNC Symbol;Acc:HGNC:19918]	protein_coding	NA	NA	4.65083	1.03632	4.48781	2.16601	1.31339e-22	9.5825e-21	up	yes
ENSG00000059728	MXD1	4084	ENST00000264444;ENST00000540449;ENST00000410000	GO:0000122(negative regulation of transcription by RNA polymerase II);GO:0000785(chromatin);GO:0000978(RNA polymerase II cis-regulatory region sequence-specific DNA binding);GO:0000981(DNA-binding transcription factor activity, RNA polymerase II-specific);GO:0001227(DNA-binding transcription repressor activity, RNA polymerase II-specific);GO:0003677(DNA binding);GO:0005515(protein binding);GO:000…	NA	NA	NA	bHLH	MAX dimerization protein 1 [Source:HGNC Symbol;Acc:HGNC:6761]	protein_coding;retained_intron	DOID:0050686(organ_system_cancer);DOID:0050687(cell_type_cancer);DOID:0060083(immune_system_cancer);DOID:1240(leukemia);DOID:12603(acute_leukemia);DOID:14566(disease_of_cellular_proliferation);DOID:162(cancer);DOID:1909(melanoma);DOID:2531(hematologic_cancer);DOID:4(disease)	NA	0.221398	1.33937	0.1653	-2.59684	1.47466e-22	1.0698e-20	down	yes
ENSG00000180747	SMG1P3	100271836	ENST00000437413;ENST00000522480;ENST00000440195;ENST00000435197;ENST00000522841;ENST00000520823	NA	NA	NA	NA	NA	SMG1 pseudogene 3 [Source:HGNC Symbol;Acc:HGNC:49860]	processed_transcript;transcribed_unprocessed_pseudogene	NA	NA	0.231129	1.34711	0.171574	-2.5431	1.53001e-22	1.10368e-20	down	yes
ENSG00000137817	PARP6	56965	ENST00000287196;ENST00000569795;ENST00000616176;ENST00000413097;ENST00000565443;ENST00000564610;ENST00000565999;ENST00000567042;ENST00000567974;ENST00000419739;ENST00000568213;ENST00000566831;ENST00000566991;ENST00000260376;ENST00000566844;ENST00000569972	GO:0003950(NAD+ ADP-ribosyltransferase activity);GO:0006471(protein ADP-ribosylation);GO:0016740(transferase activity);GO:0016757(glycosyltransferase activity);GO:0050775(positive regulation of dendrite morphogenesis);GO:0070213(protein auto-ADP-ribosylation);GO:0140289(protein mono-ADP-ribosylation);GO:1990404(NAD+-protein ADP-ribosyltransferase activity);GO:1990404(NAD+-protein ADP-ribosyltrans…	NA	K15258	EC:2.4.2.30	NA	poly(ADP-ribose) polymerase family member 6 [Source:HGNC Symbol;Acc:HGNC:26921]	protein_coding;processed_transcript;nonsense_mediated_decay;retained_intron	NA	R-HSA-8938073(PARPs transfer ADP-D-ribose to proteins (poly(ADP-ribosyl)ation));R-HSA-9686061(Nucleoprotein is ADP-ribosylated);R-HSA-9729279(Nucleoprotein is ADP-ribosylated)	3.66783	16.149	0.227125	-2.13844	1.56181e-22	1.12029e-20	down	yes
ENSG00000105327	BBC3	27113	ENST00000439096;ENST00000598636;ENST00000341983;ENST00000449228;ENST00000601438;ENST00000300880	GO:0001836(release of cytochrome c from mitochondria);GO:0001844(protein insertion into mitochondrial membrane involved in apoptotic signaling pathway);GO:0005515(protein binding);GO:0005739(mitochondrion);GO:0005741(mitochondrial outer membrane);GO:0005764(lysosome);GO:0005783(endoplasmic reticulum);GO:0005829(cytosol);GO:0006915(apoptotic process);GO:0006919(activation of cysteine-type endopept…	01524(Platinum drug resistance);04115(p53 signaling pathway);04210(Apoptosis);04215(Apoptosis - multiple species);04390(Hippo signaling pathway);05016(Huntington disease);05162(Measles);05200(Pathways in cancer);05210(Colorectal cancer);05210(Colorectal cancer)	NA	NA	NA	BCL2 binding component 3 [Source:HGNC Symbol;Acc:HGNC:17868]	protein_coding;retained_intron	DOID:0050686(organ_system_cancer);DOID:0060083(immune_system_cancer);DOID:10534(stomach_cancer);DOID:1192(peripheral_nervous_system_neoplasm);DOID:1240(leukemia);DOID:14566(disease_of_cellular_proliferation);DOID:162(cancer);DOID:2531(hematologic_cancer);DOID:2621(autonomic_nervous_system_neoplasm);DOID:3093(nervous_system_cancer);DOID:3119(gastrointestinal_system_cancer);DOID:3571(liver_cancer);…	R-HSA-139913(TP53 stimulates BBC3 (PUMA) expression);R-HSA-139914(Translocation of BBC3 (PUMA) protein to mitochondria);R-HSA-140221(Transactivation of BBC3 (PUMA) by E2F1);R-HSA-508162(BH3 only proteins associate with and inactivate anti-apoptotic BCL-XL);R-HSA-508163(BH3-only proteins associate with and inactivate anti-apoptotic BCL-2);R-HSA-9622667(BBC3 gene expression is stimulated by FOXO3,(…	4.64582	20.7877	0.223489	-2.16173	1.61398e-22	1.15125e-20	down	yes
ENSG00000225138	SLC9A3-AS1	100288152	ENST00000534918;ENST00000658225;ENST00000658086;ENST00000606074;ENST00000607286;ENST00000606319;ENST00000667376	NA	NA	NA	NA	NA	SLC9A3 antisense RNA 1 [Source:HGNC Symbol;Acc:HGNC:40550]	retained_intron;lncRNA	NA	NA	0.52086	2.80756	0.185521	-2.43035	1.6547e-22	1.17373e-20	down	yes
ENSG00000132510	KDM6B	23135	ENST00000448097;ENST00000254846;ENST00000575521	GO:0000978(RNA polymerase II cis-regulatory region sequence-specific DNA binding);GO:0005515(protein binding);GO:0005634(nucleus);GO:0005654(nucleoplasm);GO:0006325(chromatin organization);GO:0006338(chromatin remodeling);GO:0006954(inflammatory response);GO:0007507(heart development);GO:0008013(beta-catenin binding);GO:0010468(regulation of gene expression);GO:0016491(oxidoreductase activity);GO…	NA	K11448	EC:1.14.11.68	NA	lysine demethylase 6B [Source:HGNC Symbol;Acc:HGNC:29012]	protein_coding;processed_transcript	DOID:14566(disease_of_cellular_proliferation);DOID:162(cancer);DOID:4(disease)	R-HSA-3222546(AP-1 complex stimulates KDM6B transcription);R-HSA-3222593(KDM6B demethylates H3K27me3 on p16INK4A promoter);R-HSA-3223200(Demethylation of H3K27Me3 by KDM6B stimulates p16INK4A transcription, while binding of PRC1.4 complex to H3K27Me3 represses p16INK4A transcription);R-HSA-4754187(KDM6A, KDM6B, KDM7A demethylate Me2K28-histone H3);R-HSA-5661121(KDM6A, KDM6B, KDM7A demethylate Me3…	0.969887	4.54191	0.213542	-2.22741	1.78177e-22	1.25688e-20	down	yes
ENSG00000228327	ENSG00000228327		ENST00000506640;ENST00000692781	NA	NA	NA	NA	NA	general transcription factor IIi (GTF2I) pseudogene	processed_transcript	NA	NA	0.212216	1.26621	0.167599	-2.57692	1.99718e-22	1.40029e-20	down	yes
ENSG00000085840	ORC1	4998,10166	ENST00000371568;ENST00000371566	GO:0000166(nucleotide binding);GO:0000781(chromosome, telomeric region);GO:0000808(origin recognition complex);GO:0003677(DNA binding);GO:0003682(chromatin binding);GO:0003688(DNA replication origin binding);GO:0005515(protein binding);GO:0005524(ATP binding);GO:0005634(nucleus);GO:0005654(nucleoplasm);GO:0005664(nuclear origin of replication recognition complex);GO:0005829(cytosol);GO:0006260(DN…	04110(Cell cycle);04110(Cell cycle)	NA	NA	NA	origin recognition complex subunit 1 [Source:HGNC Symbol;Acc:HGNC:8487]	protein_coding	DOID:14566(disease_of_cellular_proliferation);DOID:162(cancer);DOID:225(syndrome);DOID:4(disease)	R-HSA-113638(Association of Cyclin B/Cdk1 with replicative origin inhibits pre-RC formation);R-HSA-176298(Activation of claspin);R-HSA-176318(Loading of claspin onto DNA during replication origin firing);R-HSA-68611(Formation of ORC(1-5) complex);R-HSA-68615(Formation of ORC(1-6) complex);R-HSA-68688(CDC6 association with ORC(1-6) at replication origins);R-HSA-68914(DNA polymerase alpha:primase b…	12.9541	2.97372	4.35621	2.12307	2.00699e-22	1.40029e-20	up	yes
ENSG00000185022	MAFF	23764	ENST00000338483;ENST00000407965;ENST00000624676	GO:0000122(negative regulation of transcription by RNA polymerase II);GO:0000785(chromatin);GO:0000978(RNA polymerase II cis-regulatory region sequence-specific DNA binding);GO:0000981(DNA-binding transcription factor activity, RNA polymerase II-specific);GO:0001228(DNA-binding transcription activator activity, RNA polymerase II-specific);GO:0001701(in utero embryonic development);GO:0003677(DNA …	NA	NA	NA	TF_bZIP	MAF bZIP transcription factor F [Source:HGNC Symbol;Acc:HGNC:6780]	protein_coding;retained_intron	NA	R-HSA-1008200(NFE2 binds the beta globin locus control region);R-HSA-1008220(Expression of globin genes under control of the beta globin control region);R-HSA-1008240(NFE2 is a heterodimer)	8.97725	38.9896	0.230247	-2.11874	2.12163e-22	1.47223e-20	down	yes
ENSG00000162062	TEDC2	80178	ENST00000569496;ENST00000361837;ENST00000569994;ENST00000563531;ENST00000565716;ENST00000567489;ENST00000483320;ENST00000568753;ENST00000565537;ENST00000569665;ENST00000562253;ENST00000569664;ENST00000566580	GO:0005515(protein binding);GO:0005737(cytoplasm);GO:0005814(centriole);GO:0005856(cytoskeleton);GO:0005929(cilium);GO:0042995(cell projection);GO:0045880(positive regulation of smoothened signaling pathway);GO:0045880(positive regulation of smoothened signaling pathway)	NA	NA	NA	NA	tubulin epsilon and delta complex 2 [Source:HGNC Symbol;Acc:HGNC:25849]	protein_coding;retained_intron;nonsense_mediated_decay	NA	NA	10.4411	2.34189	4.45842	2.15653	2.20409e-22	1.52118e-20	up	yes
ENSG00000167552	TUBA1A	7846	ENST00000301071;ENST00000295766;ENST00000550811;ENST00000546918;ENST00000548363;ENST00000552924;ENST00000550254	GO:0000166(nucleotide binding);GO:0000226(microtubule cytoskeleton organization);GO:0000278(mitotic cell cycle);GO:0005198(structural molecule activity);GO:0005200(structural constituent of cytoskeleton);GO:0005515(protein binding);GO:0005525(GTP binding);GO:0005634(nucleus);GO:0005737(cytoplasm);GO:0005829(cytosol);GO:0005856(cytoskeleton);GO:0005874(microtubule);GO:0005881(cytoplasmic microtubu…	04145(Phagosome);04210(Apoptosis);04530(Tight junction);04540(Gap junction);05010(Alzheimer disease);05012(Parkinson disease);05014(Amyotrophic lateral sclerosis);05016(Huntington disease);05020(Prion disease);05022(Pathways of neurodegeneration - multiple diseases);05130(Pathogenic Escherichia coli infection);05132(Salmonella infection);05132(Salmonella infection)	NA	NA	NA	tubulin alpha 1a [Source:HGNC Symbol;Acc:HGNC:20766]	protein_coding;retained_intron	DOID:0050615(respiratory_system_cancer);DOID:0050686(organ_system_cancer);DOID:0060072(benign_neoplasm);DOID:0060084(cell_type_benign_neoplasm);DOID:1324(lung_cancer);DOID:14566(disease_of_cellular_proliferation);DOID:150(disease_of_mental_health);DOID:1561(cognitive_disorder);DOID:162(cancer);DOID:2468(psychotic_disorder);DOID:255(hemangioma);DOID:3905(lung_carcinoma);DOID:3908(non_small_cell_lu…	R-HSA-1638803(Phosphorylation of cohesin by PLK1 at centromeres);R-HSA-1638821(PP2A-B56 dephosphorylates centromeric cohesin);R-HSA-190520(Association of Golgi transport vesicles with microtubules);R-HSA-190877(Insertion of connexons into the plasma membrane resulting in the formation of hemi-channels);R-HSA-191737(Docking of connexons into junctional, double-membrane spanning channels);R-HSA-221…	124.707	30.4902	4.09007	2.03213	2.71804e-22	1.86198e-20	up	yes
ENSG00000166035	LIPC	3990	ENST00000299022;ENST00000560664;ENST00000559845;ENST00000414170	GO:0004465(lipoprotein lipase activity);GO:0004620(phospholipase activity);GO:0004622(lysophospholipase activity);GO:0004806(triglyceride lipase activity);GO:0005515(protein binding);GO:0005576(extracellular region);GO:0005615(extracellular space);GO:0005788(endoplasmic reticulum lumen);GO:0006629(lipid metabolic process);GO:0006633(fatty acid biosynthetic process);GO:0008201(heparin binding);GO:…	00561(Glycerolipid metabolism);01100(Metabolic pathways);04979(Cholesterol metabolism);04979(Cholesterol metabolism)	K22283	EC:3.1.1.3	NA	lipase C, hepatic type [Source:HGNC Symbol;Acc:HGNC:6619]	protein_coding;retained_intron	DOID:0014667(disease_of_metabolism);DOID:0050013(carbohydrate_metabolism_disease);DOID:0050155(sensory_system_disease);DOID:0050686(organ_system_cancer);DOID:0050828(artery_disease);DOID:0060158(acquired_metabolic_disease);DOID:10591(pre_eclampsia);DOID:10763(hypertension);DOID:10871(age_related_macular_degeneration);DOID:114(heart_disease);DOID:1168(familial_hyperlipidemia);DOID:1287(cardiovascu…	R-HSA-174657(chylomicron remnant:apoE complex + LDLR => chylomicron remnant:apoE:LDLR complex);R-HSA-5694109(LIPC dimer hydrolyses TAG to DAG and FA);R-HSA-6785178(LMF1,2 transport LIPC dimer from ER lumen to extracellular region);R-HSA-6785181(LMF1,2 bind LIPC dimer);R-HSA-6785213(LIPC dimer binds heparin)	4.4257	0.96772	4.57332	2.19324	2.72705e-22	1.86198e-20	up	yes
ENSG00000124613	ZNF391	346157	ENST00000244576;ENST00000461521;ENST00000482767	GO:0000122(negative regulation of transcription by RNA polymerase II);GO:0000977(RNA polymerase II transcription regulatory region sequence-specific DNA binding);GO:0000981(DNA-binding transcription factor activity, RNA polymerase II-specific);GO:0001227(DNA-binding transcription repressor activity, RNA polymerase II-specific);GO:0003677(DNA binding);GO:0005634(nucleus);GO:0006357(regulation of t…	NA	NA	NA	zf-C2H2	zinc finger protein 391 [Source:HGNC Symbol;Acc:HGNC:18779]	protein_coding;processed_transcript	NA	NA	0.218031	1.41165	0.154451	-2.69477	2.93426e-22	1.9928e-20	down	yes
ENSG00000171033	PKIA	5569	ENST00000352966;ENST00000396418	GO:0000122(negative regulation of transcription by RNA polymerase II);GO:0004860(protein kinase inhibitor activity);GO:0004862(cAMP-dependent protein kinase inhibitor activity);GO:0005515(protein binding);GO:0005634(nucleus);GO:0005737(cytoplasm);GO:0006469(negative regulation of protein kinase activity);GO:0010389(regulation of G2/M transition of mitotic cell cycle);GO:0016301(kinase activity);G…	05034(Alcoholism);05034(Alcoholism)	NA	NA	NA	cAMP-dependent protein kinase inhibitor alpha [Source:HGNC Symbol;Acc:HGNC:9017]	protein_coding	NA	NA	2.07956	0.372068	5.5892	2.48264	3.66212e-22	2.47396e-20	up	yes
ENSG00000117399	CDC20	991	ENST00000310955;ENST00000372462;ENST00000478882;ENST00000482046	GO:0000922(spindle pole);GO:0005515(protein binding);GO:0005654(nucleoplasm);GO:0005680(anaphase-promoting complex);GO:0005737(cytoplasm);GO:0005813(centrosome);GO:0005815(microtubule organizing center);GO:0005819(spindle);GO:0005829(cytosol);GO:0005856(cytoskeleton);GO:0007049(cell cycle);GO:0007064(mitotic sister chromatid cohesion);GO:0007094(mitotic spindle assembly checkpoint signaling);GO:0…	04110(Cell cycle);04114(Oocyte meiosis);04120(Ubiquitin mediated proteolysis);05166(Human T-cell leukemia virus 1 infection);05203(Viral carcinogenesis);05203(Viral carcinogenesis)	NA	NA	NA	cell division cycle 20 [Source:HGNC Symbol;Acc:HGNC:1723]	protein_coding;processed_transcript	DOID:0050686(organ_system_cancer);DOID:0060083(immune_system_cancer);DOID:1240(leukemia);DOID:14566(disease_of_cellular_proliferation);DOID:162(cancer);DOID:2531(hematologic_cancer);DOID:4(disease)	R-HSA-141409(Mad1 binds kinetochore);R-HSA-141422(MAD2 converted to an inhibitory state via interaction with Mad1);R-HSA-141423(Binding of the MCC complex to the APC/C complex);R-HSA-141429(Inactivation of APC/C via CDC20 sequestration);R-HSA-141431(MAD2 associates with the Mad1 kinetochore complex);R-HSA-141437(Formation of the MCC complex);R-HSA-141439(Release of activated MAD2 from kinetochore…	287.68	71.191	4.04097	2.0147	5.44326e-22	3.65787e-20	up	yes
ENSG00000089685	BIRC5	332	ENST00000374948;ENST00000350051;ENST00000301633;ENST00000587746;ENST00000592115;ENST00000589892;ENST00000590925;ENST00000590449	GO:0000226(microtubule cytoskeleton organization);GO:0000228(nuclear chromosome);GO:0000278(mitotic cell cycle);GO:0000281(mitotic cytokinesis);GO:0000775(chromosome, centromeric region);GO:0000776(kinetochore);GO:0001934(positive regulation of protein phosphorylation);GO:0004869(cysteine-type endopeptidase inhibitor activity);GO:0005515(protein binding);GO:0005634(nucleus);GO:0005654(nucleoplasm…	01524(Platinum drug resistance);04210(Apoptosis);04215(Apoptosis - multiple species);04390(Hippo signaling pathway);05161(Hepatitis B);05200(Pathways in cancer);05210(Colorectal cancer);05210(Colorectal cancer)	NA	NA	NA	baculoviral IAP repeat containing 5 [Source:HGNC Symbol;Acc:HGNC:593]	protein_coding;retained_intron;processed_transcript;nonsense_mediated_decay	DOID:0002116(pterygium);DOID:0014667(disease_of_metabolism);DOID:0050013(carbohydrate_metabolism_disease);DOID:0050117(disease_by_infectious_agent);DOID:0050155(sensory_system_disease);DOID:0050615(respiratory_system_cancer);DOID:0050624(gastrointestinal_system_benign_neoplasm);DOID:0050686(organ_system_cancer);DOID:0050687(cell_type_cancer);DOID:0050700(cardiomyopathy);DOID:0060036(intrinsic_car…	R-HSA-141409(Mad1 binds kinetochore);R-HSA-141422(MAD2 converted to an inhibitory state via interaction with Mad1);R-HSA-141431(MAD2 associates with the Mad1 kinetochore complex);R-HSA-141439(Release of activated MAD2 from kinetochores);R-HSA-1638803(Phosphorylation of cohesin by PLK1 at centromeres);R-HSA-1638821(PP2A-B56 dephosphorylates centromeric cohesin);R-HSA-2467809(ESPL1 (Separase) cleav…	60.1757	14.8928	4.04058	2.01456	7.69835e-22	5.1462e-20	up	yes
ENSG00000147536	GINS4	84296	ENST00000276533;ENST00000523277;ENST00000520631;ENST00000518430;ENST00000522642;ENST00000518671;ENST00000520710;ENST00000520736	GO:0000727(double-strand break repair via break-induced replication);GO:0000811(GINS complex);GO:0001833(inner cell mass cell proliferation);GO:0005515(protein binding);GO:0005634(nucleus);GO:0005654(nucleoplasm);GO:0005694(chromosome);GO:0005737(cytoplasm);GO:0006260(DNA replication);GO:0006261(DNA-templated DNA replication);GO:0006268(DNA unwinding involved in DNA replication);GO:0071162(CMG co…	NA	NA	NA	NA	GINS complex subunit 4 [Source:HGNC Symbol;Acc:HGNC:28226]	protein_coding;retained_intron	NA	R-HSA-176942(Multiple proteins are localized at replication fork);R-HSA-176956(Formation of GINS complex)	5.22976	1.18482	4.41398	2.14208	7.74907e-22	5.15313e-20	up	yes
ENSG00000134294	SLC38A2	54407	ENST00000549258;ENST00000256689;ENST00000551374;ENST00000551405;ENST00000548785;ENST00000553252;ENST00000548870;ENST00000547252;ENST00000546520;ENST00000548236;ENST00000552703;ENST00000552414	GO:0003333(amino acid transmembrane transport);GO:0005295(neutral amino acid:sodium symporter activity);GO:0005515(protein binding);GO:0005737(cytoplasm);GO:0005886(plasma membrane);GO:0005887(integral component of plasma membrane);GO:0005903(brush border);GO:0006811(ion transport);GO:0006814(sodium ion transport);GO:0006836(neurotransmitter transport);GO:0006865(amino acid transport);GO:0006868(…	04724(Glutamatergic synapse);04727(GABAergic synapse);04974(Protein digestion and absorption);04974(Protein digestion and absorption)	NA	NA	NA	solute carrier family 38 member 2 [Source:HGNC Symbol;Acc:HGNC:13448]	nonsense_mediated_decay;protein_coding;processed_transcript;retained_intron	NA	R-HSA-212642(L-Glutamine transport into neurons);R-HSA-352108(SLC38A2 (ATA2)-mediated uptake of neutral amino acids)	14.3617	60.6205	0.236912	-2.07758	1.00202e-21	6.6289e-20	down	yes
ENSG00000184986	TMEM121	80757	ENST00000392519;ENST00000552019	GO:0003674(molecular_function);GO:0005515(protein binding);GO:0005575(cellular_component);GO:0008150(biological_process);GO:0016020(membrane);GO:0016021(integral component of membrane);GO:0016021(integral component of membrane)	NA	NA	NA	NA	transmembrane protein 121 [Source:HGNC Symbol;Acc:HGNC:20511]	protein_coding;processed_transcript	NA	NA	9.27972	2.03132	4.56832	2.19166	1.03977e-21	6.84316e-20	up	yes
ENSG00000144354	CDCA7	83879	ENST00000347703;ENST00000306721;ENST00000695914;ENST00000496441;ENST00000695911;ENST00000695912;ENST00000467411;ENST00000468359;ENST00000695913;ENST00000695901	GO:0005515(protein binding);GO:0005634(nucleus);GO:0005654(nucleoplasm);GO:0005737(cytoplasm);GO:0005829(cytosol);GO:0006355(regulation of DNA-templated transcription);GO:0006915(apoptotic process);GO:0042127(regulation of cell population proliferation);GO:0042127(regulation of cell population proliferation)	NA	NA	NA	NA	cell division cycle associated 7 [Source:HGNC Symbol;Acc:HGNC:14628]	protein_coding;retained_intron;nonsense_mediated_decay	NA	NA	9.60691	2.29497	4.18607	2.0656	1.35891e-21	8.89774e-20	up	yes
ENSG00000174718	RESF1	55196	ENST00000312561;ENST00000535596;ENST00000541981;ENST00000540924;ENST00000543763;ENST00000535606	GO:0000930(gamma-tubulin complex);GO:0005515(protein binding);GO:0005634(nucleus);GO:0042393(histone binding);GO:0045869(negative regulation of single stranded viral RNA replication via double stranded DNA intermediate);GO:0090309(positive regulation of DNA methylation-dependent heterochromatin formation);GO:1990226(histone methyltransferase binding);GO:1990226(histone methyltransferase binding)	NA	NA	NA	NA	retroelement silencing factor 1 [Source:HGNC Symbol;Acc:HGNC:25559]	protein_coding;processed_transcript;retained_intron	NA	NA	1.23324	5.52378	0.22326	-2.1632	1.5527e-21	1.01148e-19	down	yes
ENSG00000152465	NMT2	9397	ENST00000378165;ENST00000378150;ENST00000466201;ENST00000486786	GO:0004379(glycylpeptide N-tetradecanoyltransferase activity);GO:0005515(protein binding);GO:0005737(cytoplasm);GO:0005794(Golgi apparatus);GO:0005829(cytosol);GO:0005886(plasma membrane);GO:0006499(N-terminal protein myristoylation);GO:0016020(membrane);GO:0016740(transferase activity);GO:0016746(acyltransferase activity);GO:0018008(N-terminal peptidyl-glycine N-myristoylation);GO:0018030(peptid…	NA	K00671	EC:2.3.1.97	NA	N-myristoyltransferase 2 [Source:HGNC Symbol;Acc:HGNC:7858]	protein_coding;processed_transcript	DOID:15(reproductive_system_disease);DOID:1924(hypogonadism);DOID:2277(gonadal_disease);DOID:28(endocrine_system_disease);DOID:4(disease);DOID:7(disease_of_anatomical_entity)	R-HSA-184392(N-myristoylation of GAG polyprotein by NMT2);R-HSA-2534087(NMT1/2 transfer MYS to GNAT1)	1.86219	0.38228	4.87127	2.2843	1.62614e-21	1.05394e-19	up	yes
ENSG00000214114	MYCBP	26292	ENST00000397572;ENST00000494695;ENST00000465771;ENST00000495043	GO:0003713(transcription coactivator activity);GO:0005515(protein binding);GO:0005634(nucleus);GO:0005654(nucleoplasm);GO:0005737(cytoplasm);GO:0005739(mitochondrion);GO:0006355(regulation of DNA-templated transcription);GO:0007283(spermatogenesis);GO:0045893(positive regulation of DNA-templated transcription);GO:0045893(positive regulation of DNA-templated transcription)	NA	NA	NA	NA	MYC binding protein [Source:HGNC Symbol;Acc:HGNC:7554]	protein_coding;processed_transcript	NA	NA	5.5766	1.1941	4.67012	2.22346	1.65331e-21	1.06614e-19	up	yes
ENSG00000148773	MKI67	4288	ENST00000368654;ENST00000368653;ENST00000484853;ENST00000478293	GO:0000166(nucleotide binding);GO:0000793(condensed chromosome);GO:0003677(DNA binding);GO:0003723(RNA binding);GO:0005515(protein binding);GO:0005524(ATP binding);GO:0005634(nucleus);GO:0005654(nucleoplasm);GO:0005694(chromosome);GO:0005730(nucleolus);GO:0007049(cell cycle);GO:0007088(regulation of mitotic nuclear division);GO:0008022(protein C-terminus binding);GO:0008283(cell population prolif…	NA	NA	NA	NA	marker of proliferation Ki-67 [Source:HGNC Symbol;Acc:HGNC:7107]	protein_coding;processed_transcript	DOID:0050117(disease_by_infectious_agent);DOID:0050155(sensory_system_disease);DOID:0050615(respiratory_system_cancer);DOID:0050621(respiratory_system_benign_neoplasm);DOID:0050686(organ_system_cancer);DOID:0050687(cell_type_cancer);DOID:0060072(benign_neoplasm);DOID:0060083(immune_system_cancer);DOID:0060084(cell_type_benign_neoplasm);DOID:0060085(organ_system_benign_neoplasm);DOID:0060090(centr…	NA	9.87121	2.46326	4.00738	2.00266	1.85162e-21	1.18801e-19	up	yes
ENSG00000285417	ENSG00000285417		ENST00000582596;ENST00000585172;ENST00000584198;ENST00000577298;ENST00000647316	NA	NA	NA	NA	NA	novel pseudogene	processed_transcript;transcribed_unitary_pseudogene	NA	NA	4.75293	0.937186	5.0715	2.34241	1.95271e-21	1.24661e-19	up	yes
ENSG00000256663	ENSG00000256663		ENST00000540175	NA	NA	NA	NA	NA	ubiquitin-like with PHD and ring finger domains 1 (UHRF1) pseudogene	processed_pseudogene	NA	NA	6.73808	1.31267	5.13312	2.35984	2.02386e-21	1.2856e-19	up	yes
ENSG00000157456	CCNB2	9133	ENST00000288207;ENST00000559301;ENST00000561077;ENST00000621385	GO:0000079(regulation of cyclin-dependent protein serine/threonine kinase activity);GO:0000307(cyclin-dependent protein kinase holoenzyme complex);GO:0001701(in utero embryonic development);GO:0005515(protein binding);GO:0005634(nucleus);GO:0005737(cytoplasm);GO:0005813(centrosome);GO:0005829(cytosol);GO:0007049(cell cycle);GO:0007057(spindle assembly involved in female meiosis I);GO:0008315(G2/M…	04068(FoxO signaling pathway);04110(Cell cycle);04114(Oocyte meiosis);04115(p53 signaling pathway);04218(Cellular senescence);04914(Progesterone-mediated oocyte maturation);05166(Human T-cell leukemia virus 1 infection);05170(Human immunodeficiency virus 1 infection);05170(Human immunodeficiency virus 1 infection)	NA	NA	NA	cyclin B2 [Source:HGNC Symbol;Acc:HGNC:1580]	protein_coding;retained_intron	DOID:0050615(respiratory_system_cancer);DOID:0050686(organ_system_cancer);DOID:0060072(benign_neoplasm);DOID:0060084(cell_type_benign_neoplasm);DOID:1324(lung_cancer);DOID:14566(disease_of_cellular_proliferation);DOID:162(cancer);DOID:3905(lung_carcinoma);DOID:3908(non_small_cell_lung_carcinoma);DOID:3910(lung_adenocarcinoma);DOID:4(disease);DOID:657(adenoma)	R-HSA-170055(Myt-1 mediated phosphorylation of Cyclin B:Cdc2 complexes);R-HSA-170057(Formation of Cyclin B:Cdc2 complexes);R-HSA-170161(Dephosphorylation of cytoplasmic Cyclin B1/B2:phospho-Cdc2 (Thr 14, Tyr 15) complexes by CDC25B);R-HSA-2172183(Phosphorylation of GORASP1, GOLGA2 and RAB1A by CDK1:CCNB);R-HSA-2468287(CDK1 phosphorylates CDCA5 (Sororin) at centromeres);R-HSA-2468293(CDK1 phosphor…	27.916	6.91012	4.03986	2.01431	2.06545e-21	1.30553e-19	up	yes
ENSG00000185499	MUC1	4582	ENST00000620770;ENST00000468978;ENST00000338684;ENST00000620103;ENST00000457295	GO:0000785(chromatin);GO:0000978(RNA polymerase II cis-regulatory region sequence-specific DNA binding);GO:0002039(p53 binding);GO:0003712(transcription coregulator activity);GO:0005515(protein binding);GO:0005576(extracellular region);GO:0005615(extracellular space);GO:0005634(nucleus);GO:0005737(cytoplasm);GO:0005796(Golgi lumen);GO:0005886(plasma membrane);GO:0005887(integral component of plas…	NA	NA	NA	NA	mucin 1, cell surface associated [Source:HGNC Symbol;Acc:HGNC:7508]	retained_intron;protein_coding	DOID:0050117(disease_by_infectious_agent);DOID:0050161(lower_respiratory_tract_disease);DOID:0050177(monogenic_disease);DOID:0050615(respiratory_system_cancer);DOID:0050624(gastrointestinal_system_benign_neoplasm);DOID:0050686(organ_system_cancer);DOID:0050687(cell_type_cancer);DOID:0050737(autosomal_recessive_disease);DOID:0050739(autosomal_genetic_disease);DOID:0060056(hypersensitivity_reaction…	R-HSA-1964501(Addition of galactose to Core 6 glycoprotein);R-HSA-1964505(C1GALT1 transfers Galactose to the Tn antigen forming Core 1 glycoproteins (T antigens));R-HSA-5096532(Defective GALNT12 does not transfer GalNAc to mucins);R-HSA-5096537(Defective GALNT3 does not transfer GalNAc to mucins);R-HSA-5694487(A4GNT transfers GlcNAc to core 2 mucins);R-HSA-6785524(Defective C1GALT1C1 does not bin…	0.398619	2.61279	0.152564	-2.71251	2.13095e-21	1.3403e-19	down	yes
ENSG00000138376	BARD1	580	ENST00000260947;ENST00000465841;ENST00000432456;ENST00000650978;ENST00000479904	GO:0000151(ubiquitin ligase complex);GO:0000152(nuclear ubiquitin ligase complex);GO:0000209(protein polyubiquitination);GO:0001894(tissue homeostasis);GO:0003723(RNA binding);GO:0004842(ubiquitin-protein transferase activity);GO:0005515(protein binding);GO:0005634(nucleus);GO:0005654(nucleoplasm);GO:0005737(cytoplasm);GO:0006281(DNA repair);GO:0006282(regulation of DNA repair);GO:0006974(cellula…	03440(Homologous recombination);03440(Homologous recombination)	NA	NA	NA	BRCA1 associated RING domain 1 [Source:HGNC Symbol;Acc:HGNC:952]	protein_coding;retained_intron;nonsense_mediated_decay	DOID:0050177(monogenic_disease);DOID:0050686(organ_system_cancer);DOID:0050687(cell_type_cancer);DOID:0050736(autosomal_dominant_disease);DOID:0050739(autosomal_genetic_disease);DOID:1192(peripheral_nervous_system_neoplasm);DOID:14566(disease_of_cellular_proliferation);DOID:162(cancer);DOID:2621(autonomic_nervous_system_neoplasm);DOID:2994(germ_cell_cancer);DOID:3093(nervous_system_cancer);DOID:4…	R-HSA-5659781(BRCA1 forms a heterodimer with BARD1);R-HSA-5683385(Formation of BRCA1-A complex at DNA DSBs);R-HSA-5683735(CHEK2 is recruited to DNA DSBs);R-HSA-5683801(CHEK2 phosphorylates BRCA1);R-HSA-5684052(PIAS4 SUMOylates MDC1);R-HSA-5684071(RNF4 ubiquitinates MDC1);R-HSA-5684108(BRCA1 binds phosphorylated RBBP8);R-HSA-5684875(Binding of ATR:ATRIP to RPA at resected DNA DSBs);R-HSA-5684882(C…	0.987794	0.175113	5.64089	2.49592	2.38929e-21	1.48969e-19	up	yes
ENSG00000168393	DTYMK	1841	ENST00000305784;ENST00000400770;ENST00000432348;ENST00000493095;ENST00000464603;ENST00000420144;ENST00000445261	GO:0000166(nucleotide binding);GO:0004550(nucleoside diphosphate kinase activity);GO:0004798(thymidylate kinase activity);GO:0005524(ATP binding);GO:0005634(nucleus);GO:0005737(cytoplasm);GO:0005739(mitochondrion);GO:0005829(cytosol);GO:0006227(dUDP biosynthetic process);GO:0006233(dTDP biosynthetic process);GO:0006235(dTTP biosynthetic process);GO:0009041(uridylate kinase activity);GO:0009165(nu…	00240(Pyrimidine metabolism);01100(Metabolic pathways);01100(Metabolic pathways)	K00943	EC:2.7.4.9	NA	deoxythymidylate kinase [Source:HGNC Symbol;Acc:HGNC:3061]	protein_coding;nonsense_mediated_decay;processed_transcript;retained_intron	DOID:14566(disease_of_cellular_proliferation);DOID:162(cancer);DOID:4(disease)	R-HSA-73635(dUMP or TMP + ATP <=> dUDP or TDP + ADP [DTYMK]);R-HSA-75126(dUDP or TDP + ADP <=> dUMP or TMP + ATP [DTYMK])	64.251	16.1433	3.98005	1.99279	2.39181e-21	1.48969e-19	up	yes
ENSG00000128272	ATF4	468	ENST00000404241;ENST00000674920;ENST00000337304;ENST00000674835;ENST00000680748;ENST00000680446;ENST00000676346;ENST00000674568	GO:0000122(negative regulation of transcription by RNA polymerase II);GO:0000785(chromatin);GO:0000976(transcription cis-regulatory region binding);GO:0000977(RNA polymerase II transcription regulatory region sequence-specific DNA binding);GO:0000978(RNA polymerase II cis-regulatory region sequence-specific DNA binding);GO:0000981(DNA-binding transcription factor activity, RNA polymerase II-speci…	04010(MAPK signaling pathway);04022(cGMP-PKG signaling pathway);04137(Mitophagy - animal);04141(Protein processing in endoplasmic reticulum);04151(PI3K-Akt signaling pathway);04210(Apoptosis);04211(Longevity regulating pathway);04261(Adrenergic signaling in cardiomyocytes);04668(TNF signaling pathway);04720(Long-term potentiation);04722(Neurotrophin signaling pathway);04725(Cholinergic synapse);0…	NA	NA	TF_bZIP	activating transcription factor 4 [Source:HGNC Symbol;Acc:HGNC:786]	protein_coding	DOID:0050161(lower_respiratory_tract_disease);DOID:0050687(cell_type_cancer);DOID:14566(disease_of_cellular_proliferation);DOID:150(disease_of_mental_health);DOID:1561(cognitive_disorder);DOID:1579(respiratory_system_disease);DOID:162(cancer);DOID:171(neuroectodermal_tumor);DOID:225(syndrome);DOID:2320(obstructive_lung_disease);DOID:2468(psychotic_disorder);DOID:2994(germ_cell_cancer);DOID:3083(c…	R-HSA-1791056(Expression of CCL2);R-HSA-1791095(Expression of HERPUD);R-HSA-1791107(Expression of DDIT3 (CHOP, GADD153) in response to unfolded protein);R-HSA-1791118(Expression of ASNS (Asparagine Synthetase));R-HSA-1791150(Expression of BIP (78 kDa Glucose-regulated protein, GRP78, HSPA5));R-HSA-1791173(Expression of ATF3);R-HSA-1791180(Expression of IGFBP1);R-HSA-381128(Translation of ATF4 );R…	102.702	424.617	0.24187	-2.0477	2.73655e-21	1.69613e-19	down	yes
ENSG00000044574	HSPA5	3309	ENST00000324460;ENST00000680234;ENST00000679475;ENST00000680640;ENST00000681540;ENST00000681774;ENST00000680494;ENST00000681675;ENST00000679355;ENST00000681544;ENST00000681045;ENST00000681424;ENST00000680257	GO:0000166(nucleotide binding);GO:0001554(luteolysis);GO:0005509(calcium ion binding);GO:0005515(protein binding);GO:0005524(ATP binding);GO:0005634(nucleus);GO:0005737(cytoplasm);GO:0005739(mitochondrion);GO:0005783(endoplasmic reticulum);GO:0005788(endoplasmic reticulum lumen);GO:0005789(endoplasmic reticulum membrane);GO:0005790(smooth endoplasmic reticulum);GO:0005793(endoplasmic reticulum-Go…	03060(Protein export);04141(Protein processing in endoplasmic reticulum);04612(Antigen processing and presentation);04918(Thyroid hormone synthesis);05012(Parkinson disease);05014(Amyotrophic lateral sclerosis);05020(Prion disease);05022(Pathways of neurodegeneration - multiple diseases);05022(Pathways of neurodegeneration - multiple diseases)	K09490	EC:3.6.4.10	NA	heat shock protein family A (Hsp70) member 5 [Source:HGNC Symbol;Acc:HGNC:5238]	protein_coding;retained_intron	DOID:0014667(disease_of_metabolism);DOID:0050013(carbohydrate_metabolism_disease);DOID:0050117(disease_by_infectious_agent);DOID:0050155(sensory_system_disease);DOID:0050177(monogenic_disease);DOID:0050615(respiratory_system_cancer);DOID:0050686(organ_system_cancer);DOID:0050687(cell_type_cancer);DOID:0050736(autosomal_dominant_disease);DOID:0050739(autosomal_genetic_disease);DOID:0050828(artery_…	R-HSA-1791150(Expression of BIP (78 kDa Glucose-regulated protein, GRP78, HSPA5));R-HSA-351323(Release of 78 kDa glucose-regulated protein);R-HSA-381086(Dissociation of PERK:BiP Heterodimer);R-HSA-381158(ATF6:HSPA5 (ATF6-alpha:BiP) dissociates and HSPA5 binds unfolded protein);R-HSA-381217(IRE1:BiP dissociates in response to unfolded protein);R-HSA-5251942(Hikeshi binds HSP70s:ATP);R-HSA-5251955(…	132.263	545.77	0.242342	-2.04488	2.84472e-21	1.75466e-19	down	yes
ENSG00000167799	NUDT8	254552	ENST00000534054;ENST00000376693;ENST00000301490	GO:0000287(magnesium ion binding);GO:0005739(mitochondrion);GO:0010945(CoA pyrophosphatase activity);GO:0015938(coenzyme A catabolic process);GO:0016787(hydrolase activity);GO:0030145(manganese ion binding);GO:0036114(medium-chain fatty-acyl-CoA catabolic process);GO:0044580(butyryl-CoA catabolic process);GO:0046356(acetyl-CoA catabolic process);GO:0046872(metal ion binding);GO:0106399(acyl-coenz…	NA	NA	NA	NA	nudix hydrolase 8 [Source:HGNC Symbol;Acc:HGNC:8055]	retained_intron;protein_coding	NA	NA	4.62968	0.806425	5.74099	2.5213	3.25295e-21	1.99681e-19	up	yes
ENSG00000258728	ENSG00000258728		ENST00000691183	GO:0005515(protein binding);GO:0005737(cytoplasm);GO:0005975(carbohydrate metabolic process);GO:0006012(galactose metabolic process);GO:0008108(UDP-glucose:hexose-1-phosphate uridylyltransferase activity);GO:0008270(zinc ion binding);GO:0016740(transferase activity);GO:0016779(nucleotidyltransferase activity);GO:0033499(galactose catabolic process via UDP-galactose);GO:0046872(metal ion binding)	NA	NA	NA	NA	novel protein (GALT-IL11RA readthrough)	nonsense_mediated_decay	NA	NA	2.86869	0.608971	4.71071	2.23594	3.37676e-21	2.0629e-19	up	yes
ENSG00000185347	TEDC1	283643	ENST00000392522;ENST00000392523;ENST00000354560;ENST00000551054;ENST00000427614;ENST00000460959;ENST00000551538;ENST00000451719;ENST00000443229;ENST00000546536;ENST00000546492;ENST00000392527;ENST00000463869;ENST00000455454;ENST00000329886;ENST00000432805	GO:0005737(cytoplasm);GO:0005814(centriole);GO:0005856(cytoskeleton);GO:0005929(cilium);GO:0042995(cell projection);GO:0045880(positive regulation of smoothened signaling pathway);GO:0045880(positive regulation of smoothened signaling pathway)	NA	NA	NA	NA	tubulin epsilon and delta complex 1 [Source:HGNC Symbol;Acc:HGNC:20127]	protein_coding;processed_transcript;retained_intron	NA	NA	8.28007	2.02085	4.09731	2.03468	4.01009e-21	2.43813e-19	up	yes
ENSG00000145911	N4BP3	23138	ENST00000274605	GO:0005515(protein binding);GO:0007399(nervous system development);GO:0030424(axon);GO:0030425(dendrite);GO:0031410(cytoplasmic vesicle);GO:0042995(cell projection)	NA	NA	NA	NA	NEDD4 binding protein 3 [Source:HGNC Symbol;Acc:HGNC:29852]	protein_coding	NA	NA	3.09733	12.9874	0.238487	-2.06802	4.8561e-21	2.93852e-19	down	yes
ENSG00000081087	OSTM1	28962	ENST00000193322;ENST00000492130;ENST00000699570;ENST00000699580;ENST00000699578;ENST00000699582;ENST00000477774;ENST00000699574;ENST00000699569	GO:0005515(protein binding);GO:0005764(lysosome);GO:0005765(lysosomal membrane);GO:0005829(cytosol);GO:0016020(membrane);GO:0016021(integral component of membrane);GO:0030316(osteoclast differentiation);GO:0030321(transepithelial chloride transport);GO:0034707(chloride channel complex);GO:0034707(chloride channel complex)	NA	NA	NA	NA	osteoclastogenesis associated transmembrane protein 1 [Source:HGNC Symbol;Acc:HGNC:21652]	protein_coding;nonsense_mediated_decay;retained_intron	DOID:0080001(bone_disease);DOID:0080005(bone_remodeling_disease);DOID:13533(osteopetrosis);DOID:17(musculoskeletal_system_disease);DOID:4254(osteosclerosis);DOID:4(disease);DOID:7(disease_of_anatomical_entity)	R-HSA-2730959(CLCN7:OSTM1 exchanges Cl- for H+)	1.00924	4.30465	0.234455	-2.09262	5.73494e-21	3.45395e-19	down	yes
ENSG00000155304	HSPA13	6782	ENST00000285667;ENST00000478035	GO:0000166(nucleotide binding);GO:0005515(protein binding);GO:0005524(ATP binding);GO:0005737(cytoplasm);GO:0005739(mitochondrion);GO:0005783(endoplasmic reticulum);GO:0006457(protein folding);GO:0016887(ATP hydrolysis activity);GO:0031072(heat shock protein binding);GO:0034620(cellular response to unfolded protein);GO:0042026(protein refolding);GO:0043231(intracellular membrane-bounded organelle…	NA	NA	NA	NA	heat shock protein family A (Hsp70) member 13 [Source:HGNC Symbol;Acc:HGNC:11375]	protein_coding;processed_transcript	DOID:14566(disease_of_cellular_proliferation);DOID:162(cancer);DOID:4(disease)	R-HSA-5251942(Hikeshi binds HSP70s:ATP);R-HSA-5251955(HSP40s activate intrinsic ATPase activity of HSP70s in the nucleoplasm);R-HSA-5251959(HSP40s activate intrinsic ATPase activity of HSP70s in the cytosol);R-HSA-5252041(NPC transports Hikeshi:HSP70s:ATP from cytosol to nucleoplasm);R-HSA-5252079(HSP110s exchange ATP for ADP on HSP70s:ADP)	3.39484	14.3011	0.237382	-2.07472	5.90939e-21	3.54231e-19	down	yes
ENSG00000172197	MBOAT1	154141	ENST00000324607	GO:0003841(1-acylglycerol-3-phosphate O-acyltransferase activity);GO:0005789(endoplasmic reticulum membrane);GO:0006629(lipid metabolic process);GO:0006644(phospholipid metabolic process);GO:0008654(phospholipid biosynthetic process);GO:0010975(regulation of neuron projection development);GO:0016020(membrane);GO:0016021(integral component of membrane);GO:0016740(transferase activity);GO:0016746(a…	00561(Glycerolipid metabolism);00564(Glycerophospholipid metabolism);01100(Metabolic pathways)	K13517	EC:2.3.1.51	NA	membrane bound O-acyltransferase domain containing 1 [Source:HGNC Symbol;Acc:HGNC:21579]	protein_coding	NA	R-HSA-1482636(1-acyl LPS is acylated to PS by LPSAT);R-HSA-1482646(2-acyl LPE is acylated to PE by LPEAT);R-HSA-1482667(1-acyl LPE is acylated to PE by LPEAT);R-HSA-1482691(2-acyl LPS is acylated to PS by LPSAT)	1.77504	0.332002	5.34647	2.41859	6.29565e-21	3.75621e-19	up	yes
ENSG00000025039	RRAGD	58528	ENST00000369415	GO:0000166(nucleotide binding);GO:0003924(GTPase activity);GO:0005515(protein binding);GO:0005525(GTP binding);GO:0005634(nucleus);GO:0005654(nucleoplasm);GO:0005737(cytoplasm);GO:0005764(lysosome);GO:0005813(centrosome);GO:0005829(cytosol);GO:0008104(protein localization);GO:0009267(cellular response to starvation);GO:0010506(regulation of autophagy);GO:0016787(hydrolase activity);GO:0019003(GDP…	04140(Autophagy - animal);04150(mTOR signaling pathway);05131(Shigellosis)	NA	NA	NA	Ras related GTP binding D [Source:HGNC Symbol;Acc:HGNC:19903]	protein_coding	NA	R-HSA-165680(Formation of active mTORC1 complex);R-HSA-165692(Phosphorylation of 4E-BP1 by activated mTORC1);R-HSA-165718(mTORC1 phosphorylation of RPS6KB1 (S6K));R-HSA-377186(Activated Akt1 phosphorylates AKT1S1 (PRAS40));R-HSA-380979(RHEB in mTORC1:RHEB:GTP hydrolyses GTP);R-HSA-447074(AMPK phosphorylates Raptor in the mTORC1 complex);R-HSA-5653957(Rag dimer formation);R-HSA-5653968(Ragulator:R…	2.921	12.2586	0.238282	-2.06926	6.56673e-21	3.89972e-19	down	yes
ENSG00000100526	CDKN3	1033	ENST00000335183;ENST00000556305;ENST00000556102;ENST00000458126;ENST00000555837;ENST00000543789	GO:0000079(regulation of cyclin-dependent protein serine/threonine kinase activity);GO:0000082(G1/S transition of mitotic cell cycle);GO:0004721(phosphoprotein phosphatase activity);GO:0004722(protein serine/threonine phosphatase activity);GO:0004725(protein tyrosine phosphatase activity);GO:0005515(protein binding);GO:0005737(cytoplasm);GO:0005829(cytosol);GO:0006470(protein dephosphorylation);G…	NA	K14167	EC:3.1.3.16;EC:3.1.3.48	NA	cyclin dependent kinase inhibitor 3 [Source:HGNC Symbol;Acc:HGNC:1791]	protein_coding;processed_transcript	DOID:0014667(disease_of_metabolism);DOID:0050686(organ_system_cancer);DOID:0060158(acquired_metabolic_disease);DOID:1192(peripheral_nervous_system_neoplasm);DOID:14566(disease_of_cellular_proliferation);DOID:162(cancer);DOID:2237(hepatitis);DOID:2621(autonomic_nervous_system_neoplasm);DOID:3093(nervous_system_cancer);DOID:3118(hepatobiliary_disease);DOID:3119(gastrointestinal_system_cancer);DOID:…	NA	13.5604	3.17093	4.27648	2.09642	7.06946e-21	4.17883e-19	up	yes
ENSG00000100219	XBP1	7494,7495	ENST00000403532;ENST00000344347;ENST00000216037;ENST00000484256;ENST00000482720;ENST00000405219	GO:0000122(negative regulation of transcription by RNA polymerase II);GO:0000976(transcription cis-regulatory region binding);GO:0000977(RNA polymerase II transcription regulatory region sequence-specific DNA binding);GO:0000978(RNA polymerase II cis-regulatory region sequence-specific DNA binding);GO:0000981(DNA-binding transcription factor activity, RNA polymerase II-specific);GO:0000987(cis-re…	04141(Protein processing in endoplasmic reticulum);04932(Non-alcoholic fatty liver disease);05010(Alzheimer disease);05012(Parkinson disease);05014(Amyotrophic lateral sclerosis);05017(Spinocerebellar ataxia);05022(Pathways of neurodegeneration - multiple diseases);05022(Pathways of neurodegeneration - multiple diseases)	NA	NA	TF_bZIP	X-box binding protein 1 [Source:HGNC Symbol;Acc:HGNC:12801]	protein_coding;retained_intron	DOID:0014667(disease_of_metabolism);DOID:0050013(carbohydrate_metabolism_disease);DOID:0050161(lower_respiratory_tract_disease);DOID:0050589(inflammatory_bowel_disease);DOID:0050686(organ_system_cancer);DOID:0050687(cell_type_cancer);DOID:0050828(artery_disease);DOID:0060056(hypersensitivity_reaction_disease);DOID:0060083(immune_system_cancer);DOID:0060158(acquired_metabolic_disease);DOID:0070004…	R-HSA-1791054(Expression of GSK3A);R-HSA-1791057(Expression of TSPYL2);R-HSA-1791058(Expression of Cullin-7);R-HSA-1791060(Expression of SRPRB (SRP Receptor subunit beta));R-HSA-1791064(Expression of ARFGAP1 (GAP));R-HSA-1791066(Expression of HYOU1);R-HSA-1791069(Expression of ACADVL);R-HSA-1791071(Expression of PLA2G4B);R-HSA-1791075(Expression of DNAJB11);R-HSA-1791076(Expression of ADD1 (Adduc…	34.2664	139.702	0.245281	-2.02749	7.68438e-21	4.52139e-19	down	yes
ENSG00000158402	CDC25C	995	ENST00000323760;ENST00000415130;ENST00000513970;ENST00000503022;ENST00000648466;ENST00000514017	GO:0000079(regulation of cyclin-dependent protein serine/threonine kinase activity);GO:0000086(G2/M transition of mitotic cell cycle);GO:0004721(phosphoprotein phosphatase activity);GO:0004725(protein tyrosine phosphatase activity);GO:0005515(protein binding);GO:0005634(nucleus);GO:0005654(nucleoplasm);GO:0005737(cytoplasm);GO:0005758(mitochondrial intermembrane space);GO:0005829(cytosol);GO:0006…	04110(Cell cycle);04114(Oocyte meiosis);04914(Progesterone-mediated oocyte maturation);05170(Human immunodeficiency virus 1 infection);05206(MicroRNAs in cancer);05206(MicroRNAs in cancer)	K05867	EC:3.1.3.48	NA	cell division cycle 25C [Source:HGNC Symbol;Acc:HGNC:1727]	protein_coding;nonsense_mediated_decay	DOID:14566(disease_of_cellular_proliferation);DOID:162(cancer);DOID:4(disease)	R-HSA-156678(Activation of Cdc25C);R-HSA-170149(Translocation of active Cdc25C to the nucleus);R-HSA-170153(Dephosphorylation of nuclear Cyclin B1:phospho-Cdc2 (Thr 14, Tyr15) complexes by Cdc25 phosphatases);R-HSA-170159(Translocation of Cdc25 to the nucleus);R-HSA-5671737(p-T774-PKN1 binds CDC25C);R-HSA-5671749(p-T774-PKN1 phosphorylates CDC25C);R-HSA-6798268(TP53 and E2F4 inhibit CDC25C expres…	10.7132	2.59809	4.12348	2.04386	7.91816e-21	4.63757e-19	up	yes
ENSG00000154920	EME1	146956	ENST00000338165;ENST00000514211;ENST00000513077;ENST00000510007;ENST00000510246;ENST00000507616;ENST00000511711;ENST00000393271;ENST00000511648	GO:0000712(resolution of meiotic recombination intermediates);GO:0000785(chromatin);GO:0000792(heterochromatin);GO:0003677(DNA binding);GO:0004518(nuclease activity);GO:0004519(endonuclease activity);GO:0005515(protein binding);GO:0005634(nucleus);GO:0005654(nucleoplasm);GO:0005730(nucleolus);GO:0006281(DNA repair);GO:0006302(double-strand break repair);GO:0006310(DNA recombination);GO:0006974(ce…	03440(Homologous recombination);03460(Fanconi anemia pathway);03460(Fanconi anemia pathway)	NA	NA	NA	essential meiotic structure-specific endonuclease 1 [Source:HGNC Symbol;Acc:HGNC:24965]	protein_coding;retained_intron;nonsense_mediated_decay	NA	R-HSA-5686430(MUS81 binds EME1, EME2);R-HSA-5686440(MUS81:EME1,EME2 cleaves D-loop);R-HSA-5686475(SLX1A:SLX4 binds MUS81:EME1,(MUS81:EME2));R-HSA-5693584(Cleavage of Holliday junctions by GEN1 or SLX1A:SLX4:MUS81:EME1,(MUS81:EME2));R-HSA-6785732(DNA nucleases bind monoubiquitinated ID2 complex);R-HSA-6785986(DNA nucleases unhook the interstrand crosslink (ICL))	8.965	2.1525	4.16492	2.05829	8.16416e-21	4.75982e-19	up	yes
ENSG00000197256	KANK2	25959	ENST00000586659;ENST00000589359;ENST00000589427;ENST00000590400;ENST00000592903;ENST00000587317;ENST00000588724;ENST00000589894	GO:0000122(negative regulation of transcription by RNA polymerase II);GO:0005515(protein binding);GO:0005737(cytoplasm);GO:0005739(mitochondrion);GO:0006915(apoptotic process);GO:0008285(negative regulation of cell population proliferation);GO:0033147(negative regulation of intracellular estrogen receptor signaling pathway);GO:0035023(regulation of Rho protein signal transduction);GO:0043069(nega…	NA	NA	NA	NA	KN motif and ankyrin repeat domains 2 [Source:HGNC Symbol;Acc:HGNC:29300]	protein_coding;retained_intron;processed_transcript	NA	NA	16.1245	4.12591	3.90812	1.96647	8.75561e-21	5.08144e-19	up	yes
ENSG00000188229	TUBB4B	10383	ENST00000340384;ENST00000604929	GO:0000166(nucleotide binding);GO:0000226(microtubule cytoskeleton organization);GO:0000278(mitotic cell cycle);GO:0003725(double-stranded RNA binding);GO:0003924(GTPase activity);GO:0005200(structural constituent of cytoskeleton);GO:0005515(protein binding);GO:0005525(GTP binding);GO:0005576(extracellular region);GO:0005634(nucleus);GO:0005737(cytoplasm);GO:0005829(cytosol);GO:0005856(cytoskelet…	04145(Phagosome);04540(Gap junction);05010(Alzheimer disease);05012(Parkinson disease);05014(Amyotrophic lateral sclerosis);05016(Huntington disease);05020(Prion disease);05022(Pathways of neurodegeneration - multiple diseases);05130(Pathogenic Escherichia coli infection);05132(Salmonella infection);05132(Salmonella infection)	NA	NA	NA	tubulin beta 4B class IVb [Source:HGNC Symbol;Acc:HGNC:20771]	protein_coding;retained_intron	DOID:0050615(respiratory_system_cancer);DOID:0050686(organ_system_cancer);DOID:14566(disease_of_cellular_proliferation);DOID:162(cancer);DOID:4(disease);DOID:9261(nasopharynx_carcinoma)	R-HSA-1638803(Phosphorylation of cohesin by PLK1 at centromeres);R-HSA-1638821(PP2A-B56 dephosphorylates centromeric cohesin);R-HSA-190520(Association of Golgi transport vesicles with microtubules);R-HSA-190877(Insertion of connexons into the plasma membrane resulting in the formation of hemi-channels);R-HSA-191737(Docking of connexons into junctional, double-membrane spanning channels);R-HSA-221…	1094.53	286.391	3.82181	1.93426	1.36315e-20	7.86327e-19	up	yes
ENSG00000175063	UBE2C	11065	ENST00000356455;ENST00000372568;ENST00000335046;ENST00000405520;ENST00000496085;ENST00000352551;ENST00000243893	GO:0000151(ubiquitin ligase complex);GO:0000166(nucleotide binding);GO:0000209(protein polyubiquitination);GO:0004842(ubiquitin-protein transferase activity);GO:0005515(protein binding);GO:0005524(ATP binding);GO:0005634(nucleus);GO:0005654(nucleoplasm);GO:0005680(anaphase-promoting complex);GO:0005829(cytosol);GO:0005886(plasma membrane);GO:0006511(ubiquitin-dependent protein catabolic process);…	04120(Ubiquitin mediated proteolysis);04120(Ubiquitin mediated proteolysis)	K06688	EC:2.3.2.23	NA	ubiquitin conjugating enzyme E2 C [Source:HGNC Symbol;Acc:HGNC:15937]	protein_coding;processed_transcript	DOID:0050615(respiratory_system_cancer);DOID:0050686(organ_system_cancer);DOID:1324(lung_cancer);DOID:14566(disease_of_cellular_proliferation);DOID:162(cancer);DOID:170(endocrine_gland_cancer);DOID:1781(thyroid_cancer);DOID:3119(gastrointestinal_system_cancer);DOID:3571(liver_cancer);DOID:3905(lung_carcinoma);DOID:3908(non_small_cell_lung_carcinoma);DOID:3963(thyroid_carcinoma);DOID:4(disease);DO…	R-HSA-141423(Binding of the MCC complex to the APC/C complex);R-HSA-174057(Multiubiquitination of APC/C-associated Cdh1);R-HSA-174058(Degradation of multiubiquitinated Cdh1);R-HSA-174070(Association of Cdh1 with the APC/C);R-HSA-174079(Phosphorylation of Cdh1 by Cyclin A:Cdk2);R-HSA-174088(Association of cell cycle proteins with the APC/C:Cdh1 complex);R-HSA-174104(Ubiquitination of Cyclin A by A…	90.1794	23.2244	3.88296	1.95716	1.37135e-20	7.86327e-19	up	yes
ENSG00000105281	SLC1A5	6510	ENST00000594991;ENST00000542575;ENST00000412532;ENST00000434726	GO:0001618(virus receptor activity);GO:0005515(protein binding);GO:0005886(plasma membrane);GO:0005887(integral component of plasma membrane);GO:0006865(amino acid transport);GO:0006868(glutamine transport);GO:0008514(organic anion transmembrane transporter activity);GO:0009925(basal plasma membrane);GO:0010585(glutamine secretion);GO:0015171(amino acid transmembrane transporter activity);GO:0015…	04974(Protein digestion and absorption);05230(Central carbon metabolism in cancer);05230(Central carbon metabolism in cancer)	NA	NA	NA	solute carrier family 1 member 5 [Source:HGNC Symbol;Acc:HGNC:10943]	protein_coding	DOID:0014667(disease_of_metabolism);DOID:0050686(organ_system_cancer);DOID:0050828(artery_disease);DOID:10591(pre_eclampsia);DOID:10763(hypertension);DOID:1287(cardiovascular_system_disease);DOID:14566(disease_of_cellular_proliferation);DOID:150(disease_of_mental_health);DOID:1561(cognitive_disorder);DOID:162(cancer);DOID:178(vascular_disease);DOID:2468(psychotic_disorder);DOID:3119(gastrointesti…	R-HSA-352379(SLC1A5-mediated exchange of alanine and glutamine across the plasma membrane);R-HSA-352385(SLC1A5-mediated exchange of glutamine and alanine across the plasma membrane);R-HSA-9013145(RAC1 binds effectors at the plasma membrane);R-HSA-9017507(RHOJ binds effectors at the plasma membrane);R-HSA-9018746(RHOQ binds effectors at the plasma membrane);R-HSA-9018758(RHOH binds effectors at th…	68.2617	274.833	0.248375	-2.00941	1.37336e-20	7.86327e-19	down	yes
ENSG00000183762	KREMEN1	83999	ENST00000400335;ENST00000327813;ENST00000474001;ENST00000453585	GO:0005515(protein binding);GO:0005886(plasma membrane);GO:0006915(apoptotic process);GO:0007154(cell communication);GO:0016020(membrane);GO:0016021(integral component of membrane);GO:0016055(Wnt signaling pathway);GO:0030279(negative regulation of ossification);GO:0043025(neuronal cell body);GO:0048681(negative regulation of axon regeneration);GO:0060173(limb development);GO:0060828(regulation o…	NA	NA	NA	NA	kringle containing transmembrane protein 1 [Source:HGNC Symbol;Acc:HGNC:17550]	protein_coding;retained_intron;nonsense_mediated_decay	NA	R-HSA-1458875(WNT binds to FZD and LRP5/6);R-HSA-3769401(DKK and KRM bind LRP5/6);R-HSA-5339711(misspliced mutants of LRP5 support enhanced beta-catenin-dependent signaling);R-HSA-5368586(DKK promotes clathrin-dependent internalization of LRP6)	1.62539	0.35563	4.57044	2.19233	1.5173e-20	8.64859e-19	up	yes
ENSG00000108852	MPP2	4355,2305	ENST00000377184;ENST00000461854	GO:0005515(protein binding);GO:0005737(cytoplasm);GO:0005856(cytoskeleton);GO:0005886(plasma membrane);GO:0005911(cell-cell junction);GO:0014069(postsynaptic density);GO:0016020(membrane);GO:0030054(cell junction);GO:0030165(PDZ domain binding);GO:0030425(dendrite);GO:0032590(dendrite membrane);GO:0042995(cell projection);GO:0043197(dendritic spine);GO:0043198(dendritic shaft);GO:0044325(transmem…	NA	NA	NA	NA	MAGUK p55 scaffold protein 2 [Source:HGNC Symbol;Acc:HGNC:7220]	protein_coding	NA	NA	5.13284	1.2522	4.09907	2.0353	1.53547e-20	8.71326e-19	up	yes
ENSG00000197635	DPP4	1803	ENST00000360534;ENST00000678583;ENST00000677015;ENST00000676810;ENST00000676768;ENST00000490286	GO:0001618(virus receptor activity);GO:0001662(behavioral fear response);GO:0001666(response to hypoxia);GO:0002020(protease binding);GO:0004177(aminopeptidase activity);GO:0004252(serine-type endopeptidase activity);GO:0005102(signaling receptor binding);GO:0005515(protein binding);GO:0005576(extracellular region);GO:0005765(lysosomal membrane);GO:0005886(plasma membrane);GO:0005925(focal adhesi…	04974(Protein digestion and absorption);04974(Protein digestion and absorption)	K01278	EC:3.4.14.5	NA	dipeptidyl peptidase 4 [Source:HGNC Symbol;Acc:HGNC:3009]	protein_coding;retained_intron	DOID:0014667(disease_of_metabolism);DOID:0050013(carbohydrate_metabolism_disease);DOID:0050117(disease_by_infectious_agent);DOID:0050615(respiratory_system_cancer);DOID:0050686(organ_system_cancer);DOID:0050828(artery_disease);DOID:0060031(autoimmune_disease_of_gastrointestinal_tract);DOID:0060037(developmental_disorder_of_mental_health);DOID:0060038(specific_developmental_disorder);DOID:0060056(…	R-HSA-9023626(DPP4(39-766) hydrolyzes Glucose-dependent Insulinotropic Polypeptide (GIP));R-HSA-9023627(DPP4(1-766) hydrolyzes Glucose-dependent Insulinotropic Polypeptide (GIP));R-HSA-9023632(DPP4(39-766) hydrolyzes Glucagon-like Peptide-1 (GLP-1));R-HSA-9023633(DPP4(1-766) hydrolyzes Glucagon-like Peptide-1 (GLP-1));R-HSA-9709179(DPP4 binds DPP4 inhibitors)	0.354334	1.5873	0.223231	-2.16339	1.91011e-20	1.07913e-18	down	yes
ENSG00000168961	LGALS9	3965	ENST00000302228;ENST00000395473;ENST00000584386;ENST00000481514;ENST00000313648;ENST00000579402;ENST00000583671;ENST00000448970;ENST00000486774;ENST00000579930;ENST00000581710	GO:0002376(immune system process);GO:0002519(natural killer cell tolerance induction);GO:0005515(protein binding);GO:0005534(galactose binding);GO:0005576(extracellular region);GO:0005615(extracellular space);GO:0005634(nucleus);GO:0005737(cytoplasm);GO:0005829(cytosol);GO:0006935(chemotaxis);GO:0006954(inflammatory response);GO:0007565(female pregnancy);GO:0010628(positive regulation of gene exp…	NA	NA	NA	NA	galectin 9 [Source:HGNC Symbol;Acc:HGNC:6570]	protein_coding;retained_intron;processed_transcript	DOID:0050117(disease_by_infectious_agent);DOID:0050161(lower_respiratory_tract_disease);DOID:0050177(monogenic_disease);DOID:0050615(respiratory_system_cancer);DOID:0050686(organ_system_cancer);DOID:0050687(cell_type_cancer);DOID:0050737(autosomal_recessive_disease);DOID:0050739(autosomal_genetic_disease);DOID:0080001(bone_disease);DOID:12449(aplastic_anemia);DOID:14566(disease_of_cellular_prolif…	R-HSA-5340385(HAVCR2 binds LGALS9)	0.900896	4.0395	0.223022	-2.16474	2.12068e-20	1.19281e-18	down	yes
ENSG00000014138	POLA2	23649	ENST00000265465;ENST00000533192;ENST00000527850;ENST00000525924;ENST00000527618;ENST00000532469;ENST00000532391;ENST00000534785	GO:0003674(molecular_function);GO:0003677(DNA binding);GO:0005515(protein binding);GO:0005634(nucleus);GO:0005654(nucleoplasm);GO:0005658(alpha DNA polymerase:primase complex);GO:0005829(cytosol);GO:0006260(DNA replication);GO:0006269(DNA replication, synthesis of RNA primer);GO:0006270(DNA replication initiation);GO:0006606(protein import into nucleus);GO:0006606(protein import into nucleus)	03030(DNA replication);03030(DNA replication)	NA	NA	NA	DNA polymerase alpha 2, accessory subunit [Source:HGNC Symbol;Acc:HGNC:30073]	protein_coding;retained_intron;nonsense_mediated_decay;processed_transcript	NA	R-HSA-113504(Detection of damage during initiation of DNA synthesis in S-phase);R-HSA-174425(The primase component of DNA polymerase:primase synthesizes a 6-10 nucleotide RNA primer on the G strand of the telomere);R-HSA-174427(The polymerase component of DNA polymerase alpha:primase synthesizes a 20-nucleotide primer on the G strand of the telomere);R-HSA-174452(RFC binding displaces Pol Alpha o…	10.8785	2.77885	3.91473	1.96891	2.22648e-20	1.24683e-18	up	yes
ENSG00000159788	RGS12	6002	ENST00000382788;ENST00000502947;ENST00000511709;ENST00000512266;ENST00000504559;ENST00000509746;ENST00000511805;ENST00000510803;ENST00000506631;ENST00000344733;ENST00000336727;ENST00000506998	GO:0000794(condensed nuclear chromosome);GO:0003924(GTPase activity);GO:0005096(GTPase activator activity);GO:0005515(protein binding);GO:0005634(nucleus);GO:0005654(nucleoplasm);GO:0005730(nucleolus);GO:0005737(cytoplasm);GO:0005829(cytosol);GO:0005886(plasma membrane);GO:0007165(signal transduction);GO:0007186(G protein-coupled receptor signaling pathway);GO:0008277(regulation of G protein-coup…	NA	NA	NA	NA	regulator of G protein signaling 12 [Source:HGNC Symbol;Acc:HGNC:9994]	protein_coding;retained_intron;processed_transcript	NA	R-HSA-392212(G alpha (i) auto-inactivates by hydrolysing GTP to GDP);R-HSA-8982012(G alpha (i):RGS dissociates to inactive G alpha (i)–i1/i2/i3);R-HSA-8982019(Active G alpha (i)–i1/i2/i3 binds RGS proteins);R-HSA-8982020(G alpha (i)–i1/i2/i3 in G (i):RGS complex is inactivated)	1.31162	0.304029	4.31411	2.10906	2.56036e-20	1.42754e-18	up	yes
ENSG00000109674	NEIL3	55247	ENST00000264596;ENST00000513321	GO:0000405(bubble DNA binding);GO:0003676(nucleic acid binding);GO:0003677(DNA binding);GO:0003684(damaged DNA binding);GO:0003690(double-stranded DNA binding);GO:0003697(single-stranded DNA binding);GO:0003824(catalytic activity);GO:0003906(DNA-(apurinic or apyrimidinic site) endonuclease activity);GO:0005634(nucleus);GO:0005654(nucleoplasm);GO:0005694(chromosome);GO:0006281(DNA repair);GO:00062…	03410(Base excision repair);03410(Base excision repair)	NA	NA	NA	nei like DNA glycosylase 3 [Source:HGNC Symbol;Acc:HGNC:24573]	protein_coding;nonsense_mediated_decay	NA	R-HSA-9629195(NEIL3 recognizes and binds to 5-guanidinohydantoin (Gh) in telomeric DNA);R-HSA-9629216(NEIL3 cleaves 5-guanidinohydantoin (Gh) from damaged telomeric DNA);R-HSA-9629245(NEIL3 D132V does not cleave 5-guanidinohydantoin (Gh));R-HSA-9629358(NEIL3 recognizes and binds to 5-guanidinohydantoin);R-HSA-9629365(NEIL3 recognizes and binds to spiroiminodihydantoin);R-HSA-9629369(NEIL3 recogni…	3.58228	0.755408	4.74218	2.24555	2.63748e-20	1.46414e-18	up	yes
ENSG00000156970	BUB1B	701	ENST00000287598;ENST00000559461;ENST00000560120;ENST00000558151;ENST00000558715;ENST00000559772;ENST00000558972	GO:0000166(nucleotide binding);GO:0000775(chromosome, centromeric region);GO:0000776(kinetochore);GO:0000940(outer kinetochore);GO:0004672(protein kinase activity);GO:0004674(protein serine/threonine kinase activity);GO:0004712(protein serine/threonine/tyrosine kinase activity);GO:0005515(protein binding);GO:0005524(ATP binding);GO:0005634(nucleus);GO:0005680(anaphase-promoting complex);GO:000569…	04110(Cell cycle);05166(Human T-cell leukemia virus 1 infection);05166(Human T-cell leukemia virus 1 infection)	K06637	EC:2.7.11.1	NA	BUB1 mitotic checkpoint serine/threonine kinase B [Source:HGNC Symbol;Acc:HGNC:1149]	protein_coding;retained_intron;processed_transcript;nonsense_mediated_decay	DOID:0050686(organ_system_cancer);DOID:0050687(cell_type_cancer);DOID:0060100(musculoskeletal_system_cancer);DOID:10283(prostate_cancer);DOID:10286(prostate_carcinoma);DOID:14566(disease_of_cellular_proliferation);DOID:1612(breast_cancer);DOID:162(cancer);DOID:1749(squamous_cell_carcinoma);DOID:193(reproductive_organ_cancer);DOID:225(syndrome);DOID:305(carcinoma);DOID:3246(embryonal_rhabdomyosarc…	R-HSA-141409(Mad1 binds kinetochore);R-HSA-141422(MAD2 converted to an inhibitory state via interaction with Mad1);R-HSA-141423(Binding of the MCC complex to the APC/C complex);R-HSA-141431(MAD2 associates with the Mad1 kinetochore complex);R-HSA-141437(Formation of the MCC complex);R-HSA-141439(Release of activated MAD2 from kinetochores);R-HSA-1638803(Phosphorylation of cohesin by PLK1 at centr…	8.34261	2.07433	4.02183	2.00785	2.81306e-20	1.55485e-18	up	yes
ENSG00000074935	TUBE1	51175	ENST00000368662;ENST00000604743;ENST00000604689;ENST00000368657;ENST00000604967;ENST00000603722;ENST00000603621;ENST00000441191;ENST00000605457;ENST00000603651	GO:0000166(nucleotide binding);GO:0000226(microtubule cytoskeleton organization);GO:0000242(pericentriolar material);GO:0000278(mitotic cell cycle);GO:0005200(structural constituent of cytoskeleton);GO:0005525(GTP binding);GO:0005737(cytoplasm);GO:0005815(microtubule organizing center);GO:0005856(cytoskeleton);GO:0005874(microtubule);GO:0007017(microtubule-based process);GO:0007098(centrosome cyc…	NA	NA	NA	NA	tubulin epsilon 1 [Source:HGNC Symbol;Acc:HGNC:20775]	protein_coding;nonsense_mediated_decay;retained_intron;processed_transcript	NA	NA	0.422711	2.003	0.211039	-2.24442	2.8582e-20	1.573e-18	down	yes
ENSG00000092470	WDR76	79968	ENST00000263795;ENST00000381246;ENST00000452115	GO:0000792(heterochromatin);GO:0003677(DNA binding);GO:0005515(protein binding);GO:0005634(nucleus);GO:0006974(cellular response to DNA damage stimulus);GO:0019899(enzyme binding);GO:0090734(site of DNA damage);GO:2000001(regulation of DNA damage checkpoint);GO:2000001(regulation of DNA damage checkpoint)	NA	NA	NA	NA	WD repeat domain 76 [Source:HGNC Symbol;Acc:HGNC:25773]	protein_coding	DOID:14566(disease_of_cellular_proliferation);DOID:162(cancer);DOID:4(disease)	NA	5.39402	1.29072	4.17908	2.06319	2.93718e-20	1.60952e-18	up	yes
ENSG00000233016	SNHG7	84973	ENST00000653276;ENST00000663097;ENST00000447221;ENST00000414282;ENST00000416970;ENST00000685573;ENST00000668354;ENST00000436596	GO:0005730(nucleolus);GO:0006396(RNA processing);GO:0006396(RNA processing)	NA	NA	NA	NA	small nucleolar RNA host gene 7 [Source:HGNC Symbol;Acc:HGNC:28254]	lncRNA	NA	NA	8.52344	34.177	0.249391	-2.00352	3.12178e-20	1.70337e-18	down	yes
ENSG00000169131	ZNF354A	6940	ENST00000335815;ENST00000518048;ENST00000520331	GO:0000978(RNA polymerase II cis-regulatory region sequence-specific DNA binding);GO:0000981(DNA-binding transcription factor activity, RNA polymerase II-specific);GO:0003677(DNA binding);GO:0005634(nucleus);GO:0005654(nucleoplasm);GO:0005730(nucleolus);GO:0005829(cytosol);GO:0006355(regulation of DNA-templated transcription);GO:0006357(regulation of transcription by RNA polymerase II);GO:0007605…	05168(Herpes simplex virus 1 infection);05168(Herpes simplex virus 1 infection)	NA	NA	zf-C2H2	zinc finger protein 354A [Source:HGNC Symbol;Acc:HGNC:11628]	protein_coding;nonsense_mediated_decay	NA	R-HSA-975040(KRAB-ZNF / KAP Interaction)	0.714716	3.57368	0.199995	-2.32197	3.35771e-20	1.82431e-18	down	yes
ENSG00000138030	KHK	3795	ENST00000260599;ENST00000469936;ENST00000260598	GO:0000166(nucleotide binding);GO:0004454(ketohexokinase activity);GO:0005515(protein binding);GO:0005524(ATP binding);GO:0005737(cytoplasm);GO:0005829(cytosol);GO:0005975(carbohydrate metabolic process);GO:0006000(fructose metabolic process);GO:0009744(response to sucrose);GO:0009749(response to glucose);GO:0009750(response to fructose);GO:0010043(response to zinc ion);GO:0016301(kinase activity…	00051(Fructose and mannose metabolism);01100(Metabolic pathways);01100(Metabolic pathways)	K00846	EC:2.7.1.3	NA	ketohexokinase [Source:HGNC Symbol;Acc:HGNC:6315]	protein_coding;retained_intron	DOID:0050686(organ_system_cancer);DOID:14566(disease_of_cellular_proliferation);DOID:162(cancer);DOID:263(kidney_cancer);DOID:3996(urinary_system_cancer);DOID:4450(renal_cell_carcinoma);DOID:4451(renal_carcinoma);DOID:4(disease)	R-HSA-5656459(Defective KHK does not phosphorylate beta-D-fructose);R-HSA-70333(KHK dimer phosphorylates Fru to Fru 1-P)	3.36171	0.711383	4.7256	2.2405	3.42819e-20	1.85471e-18	up	yes
ENSG00000169679	BUB1	699	ENST00000302759;ENST00000466333;ENST00000490632;ENST00000468927;ENST00000478175;ENST00000465029;ENST00000477481;ENST00000671097	GO:0000166(nucleotide binding);GO:0000775(chromosome, centromeric region);GO:0000776(kinetochore);GO:0004672(protein kinase activity);GO:0004674(protein serine/threonine kinase activity);GO:0004712(protein serine/threonine/tyrosine kinase activity);GO:0005515(protein binding);GO:0005524(ATP binding);GO:0005634(nucleus);GO:0005654(nucleoplasm);GO:0005694(chromosome);GO:0005829(cytosol);GO:0006468(…	04110(Cell cycle);04114(Oocyte meiosis);04914(Progesterone-mediated oocyte maturation);04914(Progesterone-mediated oocyte maturation)	K02178	EC:2.7.11.1	NA	BUB1 mitotic checkpoint serine/threonine kinase [Source:HGNC Symbol;Acc:HGNC:1148]	protein_coding;retained_intron;processed_transcript;nonsense_mediated_decay	DOID:0050686(organ_system_cancer);DOID:0060083(immune_system_cancer);DOID:1240(leukemia);DOID:14566(disease_of_cellular_proliferation);DOID:15(reproductive_system_disease);DOID:162(cancer);DOID:2531(hematologic_cancer);DOID:4(disease);DOID:5223(infertility);DOID:7(disease_of_anatomical_entity)	R-HSA-141409(Mad1 binds kinetochore);R-HSA-141422(MAD2 converted to an inhibitory state via interaction with Mad1);R-HSA-141431(MAD2 associates with the Mad1 kinetochore complex);R-HSA-141439(Release of activated MAD2 from kinetochores);R-HSA-1638803(Phosphorylation of cohesin by PLK1 at centromeres);R-HSA-1638821(PP2A-B56 dephosphorylates centromeric cohesin);R-HSA-2467809(ESPL1 (Separase) cleav…	14.0975	3.68075	3.83005	1.93736	3.88796e-20	2.09458e-18	up	yes
ENSG00000197191	CYSRT1	375791	ENST00000409414;ENST00000650725	GO:0005515(protein binding);GO:0042802(identical protein binding);GO:0070062(extracellular exosome);GO:0070062(extracellular exosome)	NA	NA	NA	NA	cysteine rich tail 1 [Source:HGNC Symbol;Acc:HGNC:30529]	protein_coding	NA	NA	0.736605	4.50244	0.163601	-2.61174	3.90714e-20	2.09607e-18	down	yes
ENSG00000171132	PRKCE	5581	ENST00000306156;ENST00000494472;ENST00000498388;ENST00000421201;ENST00000467135;ENST00000469753;ENST00000394874;ENST00000480633	GO:0000165(MAPK cascade);GO:0000166(nucleotide binding);GO:0002281(macrophage activation involved in immune response);GO:0002376(immune system process);GO:0003785(actin monomer binding);GO:0004672(protein kinase activity);GO:0004674(protein serine/threonine kinase activity);GO:0004697(protein kinase C activity);GO:0004698(calcium-dependent protein kinase C activity);GO:0004699(calcium-independent…	04022(cGMP-PKG signaling pathway);04071(Sphingolipid signaling pathway);04270(Vascular smooth muscle contraction);04371(Apelin signaling pathway);04530(Tight junction);04666(Fc gamma R-mediated phagocytosis);04750(Inflammatory mediator regulation of TRP channels);04925(Aldosterone synthesis and secretion);04930(Type II diabetes mellitus);04931(Insulin resistance);04933(AGE-RAGE signaling pathway …	K18050	EC:2.7.11.13	NA	protein kinase C epsilon [Source:HGNC Symbol;Acc:HGNC:9401]	protein_coding;processed_transcript	DOID:0050177(monogenic_disease);DOID:0050686(organ_system_cancer);DOID:0050687(cell_type_cancer);DOID:0050737(autosomal_recessive_disease);DOID:0050739(autosomal_genetic_disease);DOID:0060072(benign_neoplasm);DOID:0060084(cell_type_benign_neoplasm);DOID:0060085(organ_system_benign_neoplasm);DOID:0060089(endocrine_organ_benign_neoplasm);DOID:10155(intestinal_cancer);DOID:12449(aplastic_anemia);DOI…	R-HSA-198314(DAG stimulates protein kinase C-delta);R-HSA-425861(Activation of Protein Kinase C novel isoforms);R-HSA-751040(PKC phosphorylates G alpha (z));R-HSA-8934446(Activated PKC phosphorylates SHC1);R-HSA-8982703(PKC binds active G alpha (z));R-HSA-8982709(G-alpha(z):PKC dissociates to give phosphorylated G alpha (z))	1.34932	5.56017	0.242676	-2.04289	4.39384e-20	2.34731e-18	down	yes
ENSG00000150527	MIA2	4253,387885	ENST00000348007;ENST00000556148;ENST00000553383;ENST00000553728;ENST00000280083;ENST00000556990;ENST00000556593;ENST00000396158;ENST00000341502	GO:0005515(protein binding);GO:0005783(endoplasmic reticulum);GO:0005789(endoplasmic reticulum membrane);GO:0006888(endoplasmic reticulum to Golgi vesicle-mediated transport);GO:0006897(endocytosis);GO:0008047(enzyme activator activity);GO:0009306(protein secretion);GO:0016020(membrane);GO:0016021(integral component of membrane);GO:0032527(protein exit from endoplasmic reticulum);GO:0035459(vesic…	NA	NA	NA	NA	MIA SH3 domain ER export factor 2 [Source:HGNC Symbol;Acc:HGNC:18432]	protein_coding;retained_intron;processed_transcript	NA	R-HSA-5694433(MIA2 binds PREB);R-HSA-5694435(MIA2 and MIA3 load procollagen VII into COPII vesicles);R-HSA-5694436(MIA2 and MIA3 dissociate from procollagen VII vesicle)	0.575702	2.50313	0.229993	-2.12034	4.41603e-20	2.34933e-18	down	yes
ENSG00000272645	GTF2IP20	441124	ENST00000634905;ENST00000608760;ENST00000686132;ENST00000685304	NA	NA	NA	NA	NA	general transcription factor IIi pseudogene 20 [Source:HGNC Symbol;Acc:HGNC:51732]	processed_transcript;retained_intron	NA	NA	0.640203	3.05943	0.209255	-2.25666	5.63993e-20	2.98799e-18	down	yes
ENSG00000060982	BCAT1	586	ENST00000261192;ENST00000355164;ENST00000612790;ENST00000539780;ENST00000546285;ENST00000544418;ENST00000342945	GO:0000082(G1/S transition of mitotic cell cycle);GO:0003824(catalytic activity);GO:0004084(branched-chain-amino-acid transaminase activity);GO:0005515(protein binding);GO:0005737(cytoplasm);GO:0005739(mitochondrion);GO:0005829(cytosol);GO:0006629(lipid metabolic process);GO:0008483(transaminase activity);GO:0008652(cellular amino acid biosynthetic process);GO:0009081(branched-chain amino acid me…	00270(Cysteine and methionine metabolism);00280(Valine, leucine and isoleucine degradation);00290(Valine, leucine and isoleucine biosynthesis);00770(Pantothenate and CoA biosynthesis);01100(Metabolic pathways);01210(2-Oxocarboxylic acid metabolism);01230(Biosynthesis of amino acids);01240(Biosynthesis of cofactors);01240(Biosynthesis of cofactors)	K00826	EC:2.6.1.42	NA	branched chain amino acid transaminase 1 [Source:HGNC Symbol;Acc:HGNC:976]	protein_coding;processed_transcript;non_stop_decay	DOID:0050615(respiratory_system_cancer);DOID:0050686(organ_system_cancer);DOID:14566(disease_of_cellular_proliferation);DOID:162(cancer);DOID:4(disease);DOID:9261(nasopharynx_carcinoma)	R-HSA-508189(a-ketoisocaproate, a-keto-b-methylvalerate, or a-ketoisovalerate + glutamate <=> leu, ile, or val + alpha-ketoglutarate [BCAT1]);R-HSA-70723(leu, ile, or val + alpha-ketoglutarate <=> a-ketoisocaproate, a-keto-b-methylvalerate, or a-ketoisovalerate + glutamate [BCAT1])	0.614578	2.60539	0.235887	-2.08383	6.43784e-20	3.39662e-18	down	yes
ENSG00000170385	SLC30A1	7779	ENST00000367001	GO:0001701(in utero embryonic development);GO:0005385(zinc ion transmembrane transporter activity);GO:0005515(protein binding);GO:0005737(cytoplasm);GO:0005783(endoplasmic reticulum);GO:0005794(Golgi apparatus);GO:0005886(plasma membrane);GO:0006811(ion transport);GO:0006812(cation transport);GO:0006829(zinc ion transport);GO:0006874(cellular calcium ion homeostasis);GO:0006882(cellular zinc ion …	04978(Mineral absorption)	NA	NA	NA	solute carrier family 30 member 1 [Source:HGNC Symbol;Acc:HGNC:11012]	protein_coding	DOID:0050686(organ_system_cancer);DOID:10652(Alzheimer's_disease);DOID:1289(neurodegenerative_disease);DOID:1307(dementia);DOID:14566(disease_of_cellular_proliferation);DOID:150(disease_of_mental_health);DOID:1561(cognitive_disorder);DOID:162(cancer);DOID:3119(gastrointestinal_system_cancer);DOID:331(central_nervous_system_disease);DOID:3571(liver_cancer);DOID:4(disease);DOID:680(tauopathy);DOID:…	R-HSA-435366(ZnT1 mediates the efflux of zinc from the cell)	2.11846	8.66663	0.244438	-2.03246	6.95274e-20	3.65319e-18	down	yes
ENSG00000144749	LRIG1	26018	ENST00000273261;ENST00000491821	GO:0005515(protein binding);GO:0005615(extracellular space);GO:0005886(plasma membrane);GO:0007605(sensory perception of sound);GO:0016020(membrane);GO:0016021(integral component of membrane);GO:0022405(hair cycle process);GO:0031012(extracellular matrix);GO:0032474(otolith morphogenesis);GO:0060384(innervation);GO:0060384(innervation)	NA	NA	NA	NA	leucine rich repeats and immunoglobulin like domains 1 [Source:HGNC Symbol;Acc:HGNC:17360]	protein_coding;retained_intron	DOID:0050686(organ_system_cancer);DOID:14566(disease_of_cellular_proliferation);DOID:162(cancer);DOID:263(kidney_cancer);DOID:3996(urinary_system_cancer);DOID:4450(renal_cell_carcinoma);DOID:4451(renal_carcinoma);DOID:4(disease)	R-HSA-177942(EGFR binds EGF ligand);R-HSA-8875374(MET binds LRIG1);R-HSA-8875431(LRIG1 undergoes ubiquitination);R-HSA-8875443(USP8 deubiquitinates LRIG1);R-HSA-8875490(EPS15 and HGS bind ubiquitinated MET)	1.59284	0.348632	4.56884	2.19183	7.03502e-20	3.68128e-18	up	yes
ENSG00000166508	MCM7	4176	ENST00000489841;ENST00000621318;ENST00000303887;ENST00000354230;ENST00000425308;ENST00000485286;ENST00000463722;ENST00000465738;ENST00000467516;ENST00000493352;ENST00000465688	GO:0000166(nucleotide binding);GO:0000727(double-strand break repair via break-induced replication);GO:0000781(chromosome, telomeric region);GO:0000785(chromatin);GO:0003677(DNA binding);GO:0003678(DNA helicase activity);GO:0003697(single-stranded DNA binding);GO:0004386(helicase activity);GO:0005515(protein binding);GO:0005524(ATP binding);GO:0005634(nucleus);GO:0005654(nucleoplasm);GO:0005694(c…	03030(DNA replication);04110(Cell cycle);04110(Cell cycle)	K02210	EC:3.6.4.12	NA	minichromosome maintenance complex component 7 [Source:HGNC Symbol;Acc:HGNC:6950]	retained_intron;protein_coding	DOID:0050177(monogenic_disease);DOID:0050686(organ_system_cancer);DOID:0050687(cell_type_cancer);DOID:0050737(autosomal_recessive_disease);DOID:0050739(autosomal_genetic_disease);DOID:10283(prostate_cancer);DOID:1192(peripheral_nervous_system_neoplasm);DOID:12704(ataxia_telangiectasia);DOID:14566(disease_of_cellular_proliferation);DOID:162(cancer);DOID:171(neuroectodermal_tumor);DOID:1749(squamou…	R-HSA-169468(MCM2-7 mediated fork unwinding);R-HSA-176298(Activation of claspin);R-HSA-176318(Loading of claspin onto DNA during replication origin firing);R-HSA-176942(Multiple proteins are localized at replication fork);R-HSA-68914(DNA polymerase alpha:primase binds at the origin);R-HSA-68916(DNA Replication Factor A (RPA) associates with the pre-replicative complex at the origin);R-HSA-68917(C…	117.545	31.5432	3.72646	1.89781	7.27425e-20	3.79092e-18	up	yes
ENSG00000176845	METRNL	284207	ENST00000320095;ENST00000571940;ENST00000571814	GO:0003674(molecular_function);GO:0005179(hormone activity);GO:0005576(extracellular region);GO:0005615(extracellular space);GO:0007165(signal transduction);GO:0009409(response to cold);GO:0014850(response to muscle activity);GO:0045444(fat cell differentiation);GO:0050728(negative regulation of inflammatory response);GO:0050873(brown fat cell differentiation);GO:0070062(extracellular exosome);GO…	NA	NA	NA	NA	meteorin like, glial cell differentiation regulator [Source:HGNC Symbol;Acc:HGNC:27584]	protein_coding;processed_transcript	NA	NA	1.4855	6.63226	0.223981	-2.15855	8.21389e-20	4.24667e-18	down	yes
ENSG00000161011	SQSTM1	8878	ENST00000360718;ENST00000389805;ENST00000506690;ENST00000506042;ENST00000514093;ENST00000466342;ENST00000422245;ENST00000512234;ENST00000453046;ENST00000481335;ENST00000508284;ENST00000626660;ENST00000485412	GO:0000122(negative regulation of transcription by RNA polymerase II);GO:0000407(phagophore assembly site);GO:0000422(autophagy of mitochondrion);GO:0000423(mitophagy);GO:0000932(P-body);GO:0001659(temperature homeostasis);GO:0001934(positive regulation of protein phosphorylation);GO:0002376(immune system process);GO:0002931(response to ischemia);GO:0004674(protein serine/threonine kinase activit…	04137(Mitophagy - animal);04140(Autophagy - animal);04217(Necroptosis);04218(Cellular senescence);04380(Osteoclast differentiation);05014(Amyotrophic lateral sclerosis);05022(Pathways of neurodegeneration - multiple diseases);05131(Shigellosis);05418(Fluid shear stress and atherosclerosis);05418(Fluid shear stress and atherosclerosis)	NA	NA	NA	sequestosome 1 [Source:HGNC Symbol;Acc:HGNC:11280]	protein_coding;processed_transcript;retained_intron;nonsense_mediated_decay	DOID:0050686(organ_system_cancer);DOID:0050687(cell_type_cancer);DOID:0060083(immune_system_cancer);DOID:0060100(musculoskeletal_system_cancer);DOID:0080000(muscular_disease);DOID:0080001(bone_disease);DOID:0080005(bone_remodeling_disease);DOID:10283(prostate_cancer);DOID:10286(prostate_carcinoma);DOID:1036(chronic_leukemia);DOID:10652(Alzheimer's_disease);DOID:11870(Pick's_disease);DOID:1192(per…	R-HSA-193641(IKK-beta is recruited);R-HSA-193684(p62 recruits an atypical PKC);R-HSA-193694(p62 is recruited and forms a complex with TRAF6);R-HSA-193703(IKKbeta is activated);R-HSA-193705(IKKbeta phosphorylates IkB causing NF-kB to dissociate);R-HSA-204947(Polyubiquitinated NRIF migrates to the nucleus);R-HSA-205008(Polyubiquitinated NRIF binds to p62 (Sequestosome));R-HSA-209566(TRAF6 is auto-u…	145.631	567.998	0.256394	-1.96356	8.21529e-20	4.24667e-18	down	yes
ENSG00000132383	RPA1	6117,25885	ENST00000254719;ENST00000574049;ENST00000570451;ENST00000573994	GO:0000723(telomere maintenance);GO:0000724(double-strand break repair via homologous recombination);GO:0000781(chromosome, telomeric region);GO:0003676(nucleic acid binding);GO:0003677(DNA binding);GO:0003684(damaged DNA binding);GO:0003697(single-stranded DNA binding);GO:0005515(protein binding);GO:0005634(nucleus);GO:0005654(nucleoplasm);GO:0005662(DNA replication factor A complex);GO:0006260(…	03030(DNA replication);03420(Nucleotide excision repair);03430(Mismatch repair);03440(Homologous recombination);03460(Fanconi anemia pathway);03460(Fanconi anemia pathway)	NA	NA	NA	replication protein A1 [Source:HGNC Symbol;Acc:HGNC:10289]	protein_coding;retained_intron	DOID:0050686(organ_system_cancer);DOID:14566(disease_of_cellular_proliferation);DOID:1612(breast_cancer);DOID:162(cancer);DOID:4(disease);DOID:5093(thoracic_cancer)	R-HSA-110307(REV1 binds AP-dsDNA);R-HSA-110308(REV1 inserts dCMP opposite to AP sites in DNA);R-HSA-110311(POLZ extends translesion synthesis);R-HSA-110316(POLH binds monoUb:K164-PCNA at damaged TT-CPD-DNA template);R-HSA-110317(Insertion of correct bases opposite the lesion by POLH);R-HSA-110319(Elongation by POLH);R-HSA-110363(FEN1 bound to PCNA and APEX1 cleaves flap ssDNA);R-HSA-110364(PCNA:P…	50.2849	13.5013	3.72444	1.89703	8.83938e-20	4.55086e-18	up	yes
ENSG00000137752	CASP1	834	ENST00000436863;ENST00000526511;ENST00000525825;ENST00000695718;ENST00000695720;ENST00000533400;ENST00000695715;ENST00000695717;ENST00000528424;ENST00000527979	GO:0002221(pattern recognition receptor signaling pathway);GO:0004175(endopeptidase activity);GO:0004197(cysteine-type endopeptidase activity);GO:0005515(protein binding);GO:0005730(nucleolus);GO:0005737(cytoplasm);GO:0005829(cytosol);GO:0005874(microtubule);GO:0005886(plasma membrane);GO:0006508(proteolysis);GO:0006915(apoptotic process);GO:0006919(activation of cysteine-type endopeptidase activ…	04217(Necroptosis);04621(NOD-like receptor signaling pathway);04623(Cytosolic DNA-sensing pathway);04625(C-type lectin receptor signaling pathway);05014(Amyotrophic lateral sclerosis);05130(Pathogenic Escherichia coli infection);05131(Shigellosis);05132(Salmonella infection);05133(Pertussis);05134(Legionellosis);05135(Yersinia infection);05164(Influenza A);05171(Coronavirus disease - COVID-19);05…	K01370	EC:3.4.22.36	NA	caspase 1 [Source:HGNC Symbol;Acc:HGNC:1499]	protein_coding;retained_intron	DOID:0050117(disease_by_infectious_agent);DOID:0050338(primary_bacterial_infectious_disease);DOID:0050686(organ_system_cancer);DOID:0050687(cell_type_cancer);DOID:104(bacterial_infectious_disease);DOID:10534(stomach_cancer);DOID:114(heart_disease);DOID:1192(peripheral_nervous_system_neoplasm);DOID:120(female_reproductive_organ_cancer);DOID:1287(cardiovascular_system_disease);DOID:1289(neurodegene…	R-HSA-448673(Formation of caspase-1 p10/p20 dimer);R-HSA-448678(CTSG cleaves CASP1(1-404));R-HSA-448702(Caspase-1 active tetramer formation);R-HSA-448703(Interleukin-1 family precursors are cleaved by caspase-1);R-HSA-622420(NOD1 induced apoptosis is mediated by RIP2 and CARD8);R-HSA-6798081(TP53 family members stimulate CASP1 expression);R-HSA-844612(PYCARD recruits procaspase-1 via CARD);R-HSA-…	0.290002	1.67879	0.172745	-2.53329	9.3778e-20	4.80866e-18	down	yes
ENSG00000135617	PRADC1	84279	ENST00000258083;ENST00000470391	GO:0005515(protein binding);GO:0005576(extracellular region);GO:0005576(extracellular region)	NA	NA	NA	NA	protease associated domain containing 1 [Source:HGNC Symbol;Acc:HGNC:16047]	protein_coding;retained_intron	NA	NA	16.9762	4.17899	4.06228	2.02229	9.98933e-20	5.10175e-18	up	yes
ENSG00000153048	CARHSP1	23589	ENST00000311052;ENST00000396593;ENST00000563815;ENST00000562843;ENST00000570125;ENST00000618335;ENST00000567908;ENST00000561530;ENST00000611932;ENST00000619881;ENST00000562586;ENST00000567626	GO:0000177(cytoplasmic exosome (RNase complex));GO:0000932(P-body);GO:0003676(nucleic acid binding);GO:0003723(RNA binding);GO:0003730(mRNA 3'-UTR binding);GO:0005515(protein binding);GO:0005737(cytoplasm);GO:0005829(cytosol);GO:0019902(phosphatase binding);GO:0035556(intracellular signal transduction);GO:0043186(P granule);GO:0043488(regulation of mRNA stability);GO:0043488(regulation of mRNA st…	NA	NA	NA	CSD	calcium regulated heat stable protein 1 [Source:HGNC Symbol;Acc:HGNC:17150]	protein_coding;retained_intron;processed_transcript	NA	NA	19.8769	5.29355	3.75493	1.90878	1.14274e-19	5.79562e-18	up	yes
ENSG00000145386	CCNA2	890	ENST00000274026	GO:0000079(regulation of cyclin-dependent protein serine/threonine kinase activity);GO:0000086(G2/M transition of mitotic cell cycle);GO:0000307(cyclin-dependent protein kinase holoenzyme complex);GO:0001939(female pronucleus);GO:0001940(male pronucleus);GO:0005515(protein binding);GO:0005634(nucleus);GO:0005654(nucleoplasm);GO:0005737(cytoplasm);GO:0005829(cytosol);GO:0006275(regulation of DNA r…	04110(Cell cycle);04152(AMPK signaling pathway);04218(Cellular senescence);04914(Progesterone-mediated oocyte maturation);05161(Hepatitis B);05165(Human papillomavirus infection);05166(Human T-cell leukemia virus 1 infection);05169(Epstein-Barr virus infection);05200(Pathways in cancer);05202(Transcriptional misregulation in cancer);05203(Viral carcinogenesis);05221(Acute myeloid leukemia)	NA	NA	NA	cyclin A2 [Source:HGNC Symbol;Acc:HGNC:1578]	protein_coding	DOID:0050155(sensory_system_disease);DOID:0050589(inflammatory_bowel_disease);DOID:0050624(gastrointestinal_system_benign_neoplasm);DOID:0050686(organ_system_cancer);DOID:0050687(cell_type_cancer);DOID:0060072(benign_neoplasm);DOID:0060083(immune_system_cancer);DOID:0060084(cell_type_benign_neoplasm);DOID:0060085(organ_system_benign_neoplasm);DOID:0060100(musculoskeletal_system_cancer);DOID:00601…	R-HSA-1363303(p130 (RBL2) in complex with E2F4/5:DP1/2 binds to cyclin E/A:CDK2);R-HSA-1363306(p130 (RBL2) binds Cyclin E/A:CDK2);R-HSA-1363311(p107 (RBL1) in complex with E2F4:DP1/2 binds to cyclin E/A:CDK2);R-HSA-1363314(p107 (RBL1) binds CyclinE/A:CDK2);R-HSA-163096(Recruitment of Telomerase RNP to the Telomeric Chromosome End);R-HSA-170084(Formation of Cyclin A:Cdc2 complexes);R-HSA-170087(CA…	29.818	7.92279	3.76357	1.9121	1.14387e-19	5.79562e-18	up	yes
ENSG00000166340	TPP1	1200,65057	ENST00000645620;ENST00000646777;ENST00000644218;ENST00000643479;ENST00000644831;ENST00000299427;ENST00000533371;ENST00000644683;ENST00000647016;ENST00000643342;ENST00000528917;ENST00000428886;ENST00000646691;ENST00000531754;ENST00000645331;ENST00000524924;ENST00000645020;ENST00000528657;ENST00000647152;ENST00000524611;ENST00000528807	GO:0004175(endopeptidase activity);GO:0004252(serine-type endopeptidase activity);GO:0005515(protein binding);GO:0005764(lysosome);GO:0005794(Golgi apparatus);GO:0006508(proteolysis);GO:0006629(lipid metabolic process);GO:0007040(lysosome organization);GO:0007399(nervous system development);GO:0007417(central nervous system development);GO:0008233(peptidase activity);GO:0008236(serine-type peptid…	04142(Lysosome);04142(Lysosome)	K01279	EC:3.4.14.9	NA	tripeptidyl peptidase 1 [Source:HGNC Symbol;Acc:HGNC:2073]	protein_coding;retained_intron;nonsense_mediated_decay	NA	R-HSA-1791138(Expression of TPP1)	16.6248	64.7637	0.256699	-1.96185	1.1785e-19	5.94747e-18	down	yes
ENSG00000183696	UPP1	7378	ENST00000482015;ENST00000444999;ENST00000331803;ENST00000417464;ENST00000395560;ENST00000495446;ENST00000421046;ENST00000395564;ENST00000436673;ENST00000457596;ENST00000432131;ENST00000416681	GO:0003824(catalytic activity);GO:0004850(uridine phosphorylase activity);GO:0005654(nucleoplasm);GO:0005737(cytoplasm);GO:0005829(cytosol);GO:0006139(nucleobase-containing compound metabolic process);GO:0006218(uridine catabolic process);GO:0006220(pyrimidine nucleotide metabolic process);GO:0006248(CMP catabolic process);GO:0006249(dCMP catabolic process);GO:0009032(thymidine phosphorylase acti…	00240(Pyrimidine metabolism);00983(Drug metabolism - other enzymes);01100(Metabolic pathways);01100(Metabolic pathways)	K00757	EC:2.4.2.3	NA	uridine phosphorylase 1 [Source:HGNC Symbol;Acc:HGNC:12576]	processed_transcript;nonsense_mediated_decay;protein_coding;retained_intron	DOID:0050686(organ_system_cancer);DOID:14566(disease_of_cellular_proliferation);DOID:1612(breast_cancer);DOID:162(cancer);DOID:3459(breast_carcinoma);DOID:4(disease);DOID:5093(thoracic_cancer)	R-HSA-74372(uracil + (deoxy)ribose 1-phosphate <=> (deoxy)uridine + orthophosphate [UPP]);R-HSA-74376((deoxy)uridine + orthophosphate <=> uracil + (deoxy)ribose 1-phosphate (UPP))	23.6348	91.9539	0.257029	-1.96	1.22842e-19	6.17499e-18	down	yes
ENSG00000172731	LRRC20	55222	ENST00000446961;ENST00000395010;ENST00000373224	GO:0005515(protein binding);GO:0005515(protein binding)	NA	NA	NA	NA	leucine rich repeat containing 20 [Source:HGNC Symbol;Acc:HGNC:23421]	protein_coding	NA	NA	5.68215	1.38597	4.09976	2.03554	1.32197e-19	6.61918e-18	up	yes
ENSG00000137310	TCF19	6941	ENST00000376257;ENST00000376255;ENST00000542218	GO:0005515(protein binding);GO:0005634(nucleus);GO:0010468(regulation of gene expression);GO:0046872(metal ion binding);GO:0046872(metal ion binding)	NA	NA	NA	Others	transcription factor 19 [Source:HGNC Symbol;Acc:HGNC:11629]	protein_coding	NA	NA	33.2607	8.92476	3.72678	1.89793	1.39442e-19	6.95465e-18	up	yes
ENSG00000108771	DHX58	79132	ENST00000251642;ENST00000592024;ENST00000430773;ENST00000586522;ENST00000413196;ENST00000590637;ENST00000589979	GO:0000166(nucleotide binding);GO:0002376(immune system process);GO:0003677(DNA binding);GO:0003723(RNA binding);GO:0003724(RNA helicase activity);GO:0003725(double-stranded RNA binding);GO:0003727(single-stranded RNA binding);GO:0004386(helicase activity);GO:0005515(protein binding);GO:0005524(ATP binding);GO:0005737(cytoplasm);GO:0008270(zinc ion binding);GO:0009615(response to virus);GO:000961…	04622(RIG-I-like receptor signaling pathway);04622(RIG-I-like receptor signaling pathway)	K12649	EC:3.6.4.13	NA	DExH-box helicase 58 [Source:HGNC Symbol;Acc:HGNC:29517]	protein_coding;retained_intron;nonsense_mediated_decay	DOID:0050117(disease_by_infectious_agent);DOID:4(disease);DOID:8771(contagious_pustular_dermatitis);DOID:934(viral_infectious_disease)	R-HSA-168935(viral dsRNA binds DDX58)	1.77275	7.44409	0.238142	-2.0701	1.49213e-19	7.41304e-18	down	yes
ENSG00000154133	ROBO4	54538	ENST00000306534;ENST00000527279;ENST00000533337;ENST00000526899;ENST00000534407;ENST00000525182;ENST00000532216;ENST00000532300	GO:0001525(angiogenesis);GO:0005515(protein binding);GO:0005886(plasma membrane);GO:0007156(homophilic cell adhesion via plasma membrane adhesion molecules);GO:0007411(axon guidance);GO:0016021(integral component of membrane);GO:0030154(cell differentiation);GO:0030334(regulation of cell migration);GO:0030424(axon);GO:0038023(signaling receptor activity);GO:0061028(establishment of endothelial ba…	NA	NA	NA	NA	roundabout guidance receptor 4 [Source:HGNC Symbol;Acc:HGNC:17985]	protein_coding;processed_transcript;retained_intron	DOID:0050155(sensory_system_disease);DOID:0050161(lower_respiratory_tract_disease);DOID:0050828(artery_disease);DOID:0060037(developmental_disorder_of_mental_health);DOID:0060038(specific_developmental_disorder);DOID:0060040(pervasive_developmental_disorder);DOID:0060041(autism_spectrum_disorder);DOID:10763(hypertension);DOID:11119(Gilles_de_la_Tourette_syndrome);DOID:12849(autistic_disorder);DOI…	NA	0.388931	1.84383	0.210937	-2.24512	1.7363e-19	8.59269e-18	down	yes
ENSG00000213390	ARHGAP19	84986,100533184	ENST00000358531;ENST00000493068;ENST00000358308	GO:0005096(GTPase activator activity);GO:0005515(protein binding);GO:0005634(nucleus);GO:0005737(cytoplasm);GO:0005829(cytosol);GO:0005886(plasma membrane);GO:0007165(signal transduction);GO:0043231(intracellular membrane-bounded organelle);GO:0050790(regulation of catalytic activity);GO:0051056(regulation of small GTPase mediated signal transduction);GO:0051056(regulation of small GTPase mediate…	NA	NA	NA	NA	Rho GTPase activating protein 19 [Source:HGNC Symbol;Acc:HGNC:23724]	protein_coding;retained_intron	NA	R-HSA-8981637(RHOA GAPs stimulate RHOA GTPase activity)	2.87072	0.696088	4.12408	2.04407	1.77775e-19	8.76382e-18	up	yes
ENSG00000124593	ENSG00000124593		ENST00000335515;ENST00000456057;ENST00000487182	NA	NA	NA	NA	NA	novel protein	nonsense_mediated_decay;retained_intron	NA	NA	20.3133	5.45097	3.72654	1.89784	1.89325e-19	9.29731e-18	up	yes
ENSG00000188486	H2AX	3014	ENST00000530167;ENST00000375167	GO:0000077(DNA damage checkpoint signaling);GO:0000724(double-strand break repair via homologous recombination);GO:0000781(chromosome, telomeric region);GO:0000785(chromatin);GO:0000786(nucleosome);GO:0000794(condensed nuclear chromosome);GO:0001673(male germ cell nucleus);GO:0001741(XY body);GO:0003677(DNA binding);GO:0003684(damaged DNA binding);GO:0005515(protein binding);GO:0005634(nucleus);G…	04217(Necroptosis);05034(Alcoholism);05322(Systemic lupus erythematosus);05322(Systemic lupus erythematosus)	NA	NA	NA	H2A.X variant histone [Source:HGNC Symbol;Acc:HGNC:4739]	protein_coding;nonsense_mediated_decay	DOID:0050155(sensory_system_disease);DOID:0050177(monogenic_disease);DOID:0050686(organ_system_cancer);DOID:0050687(cell_type_cancer);DOID:0050736(autosomal_dominant_disease);DOID:0050737(autosomal_recessive_disease);DOID:0050739(autosomal_genetic_disease);DOID:0060116(sensory_system_cancer);DOID:12704(ataxia_telangiectasia);DOID:1272(telangiectasis);DOID:1287(cardiovascular_system_disease);DOID:…	R-HSA-1214188(PRDM9 trimethylates histone H3);R-HSA-176700(Incorporation Of Extended And Processed Telomere End Into Higher Order T-Loop And Associated Protein Structure);R-HSA-181450(Incorporation Of Extended And Processed Telomere End Into Associated Protein Structure);R-HSA-212222(PRC2 recruits DNA methyltransferases);R-HSA-212252(Polycomb Repressive Complex 2 (PRC2) Is recruited to chromatin)…	179.227	48.8227	3.67097	1.87616	2.03944e-19	9.97686e-18	up	yes
ENSG00000049192	ADAMTS6	11174	ENST00000381052;ENST00000381055	GO:0001822(kidney development);GO:0003279(cardiac septum development);GO:0004222(metalloendopeptidase activity);GO:0005576(extracellular region);GO:0006508(proteolysis);GO:0007507(heart development);GO:0008233(peptidase activity);GO:0008237(metallopeptidase activity);GO:0016787(hydrolase activity);GO:0030198(extracellular matrix organization);GO:0031012(extracellular matrix);GO:0035904(aorta deve…	NA	NA	NA	NA	ADAM metallopeptidase with thrombospondin type 1 motif 6 [Source:HGNC Symbol;Acc:HGNC:222]	nonsense_mediated_decay;protein_coding	NA	R-HSA-5173005(B3GALTL transfers glucose to O-fucosyl-proteins);R-HSA-5173192(POFUT2 transfers fucose to TSR domain-containing proteins);R-HSA-6785565(Defective B3GALTL does not transfer glucose to O-fucosyl-proteins)	0.109068	0.654696	0.166593	-2.5856	2.19099e-19	1.06773e-17	down	yes
ENSG00000174738	NR1D2	9975	ENST00000312521;ENST00000383773;ENST00000472780	GO:0000122(negative regulation of transcription by RNA polymerase II);GO:0000785(chromatin);GO:0000978(RNA polymerase II cis-regulatory region sequence-specific DNA binding);GO:0000981(DNA-binding transcription factor activity, RNA polymerase II-specific);GO:0000987(cis-regulatory region sequence-specific DNA binding);GO:0001227(DNA-binding transcription repressor activity, RNA polymerase II-spec…	NA	NA	NA	THR-like	nuclear receptor subfamily 1 group D member 2 [Source:HGNC Symbol;Acc:HGNC:7963]	protein_coding;nonsense_mediated_decay;retained_intron	NA	R-HSA-376419(Formation of NR-MED1 Coactivator Complex);R-HSA-382096(Formation of NR-NCOR Corepressor Complex)	0.709877	3.09443	0.229405	-2.12403	2.33007e-19	1.13119e-17	down	yes
ENSG00000179094	PER1	5187	ENST00000317276;ENST00000581395;ENST00000579203;ENST00000579065;ENST00000581703;ENST00000585284;ENST00000578223;ENST00000584202;ENST00000578950;ENST00000583677;ENST00000577424;ENST00000579098	GO:0000122(negative regulation of transcription by RNA polymerase II);GO:0000976(transcription cis-regulatory region binding);GO:0000978(RNA polymerase II cis-regulatory region sequence-specific DNA binding);GO:0001222(transcription corepressor binding);GO:0002028(regulation of sodium ion transport);GO:0005515(protein binding);GO:0005634(nucleus);GO:0005654(nucleoplasm);GO:0005737(cytoplasm);GO:0…	04710(Circadian rhythm);04713(Circadian entrainment);04713(Circadian entrainment)	NA	NA	NA	period circadian regulator 1 [Source:HGNC Symbol;Acc:HGNC:8845]	protein_coding;nonsense_mediated_decay;retained_intron	DOID:0050686(organ_system_cancer);DOID:0060037(developmental_disorder_of_mental_health);DOID:0060040(pervasive_developmental_disorder);DOID:0060041(autism_spectrum_disorder);DOID:10155(intestinal_cancer);DOID:1192(peripheral_nervous_system_neoplasm);DOID:12849(autistic_disorder);DOID:1289(neurodegenerative_disease);DOID:1307(dementia);DOID:14330(Parkinson's_disease);DOID:14566(disease_of_cellular…	R-HSA-1856948(Formation of CRY:PER:Kinase complex);R-HSA-400219(Beta-TrCP1 binds phosphorylated PER proteins);R-HSA-400256(CRY:PER heterodimer binds the BMAL1:CLOCK/NPAS2 heterodimer);R-HSA-400267(BTRC:CUL1:SKP1 (SCF-beta-TrCP1) ubiquitinylates PER proteins);R-HSA-400382(CSNK1E,CSNK1D phosphorylate CRY and PER proteins);R-HSA-549385(CRY:PER:Kinase complex translocates to the nucleus);R-HSA-549533…	2.43781	9.62476	0.253285	-1.98116	2.45744e-19	1.18851e-17	down	yes
ENSG00000157601	MX1	4599	ENST00000398600;ENST00000681849;ENST00000398598;ENST00000681266;ENST00000478268;ENST00000680176;ENST00000680776;ENST00000680980;ENST00000680637;ENST00000486275;ENST00000679408;ENST00000424365;ENST00000679528;ENST00000484465;ENST00000679911;ENST00000680942;ENST00000468506;ENST00000681382;ENST00000681191;ENST00000681857;ENST00000288383;ENST00000681671;ENST00000679626;ENST00000441677;ENST00000417963…	GO:0000166(nucleotide binding);GO:0002376(immune system process);GO:0003924(GTPase activity);GO:0005515(protein binding);GO:0005525(GTP binding);GO:0005634(nucleus);GO:0005737(cytoplasm);GO:0005783(endoplasmic reticulum);GO:0005789(endoplasmic reticulum membrane);GO:0005829(cytosol);GO:0005874(microtubule);GO:0006915(apoptotic process);GO:0006952(defense response);GO:0007165(signal transduction);…	05160(Hepatitis C);05162(Measles);05164(Influenza A);05165(Human papillomavirus infection);05171(Coronavirus disease - COVID-19);05171(Coronavirus disease - COVID-19)	NA	NA	NA	MX dynamin like GTPase 1 [Source:HGNC Symbol;Acc:HGNC:7532]	protein_coding;retained_intron	DOID:0050117(disease_by_infectious_agent);DOID:0060056(hypersensitivity_reaction_disease);DOID:12287(Crimean_Congo_hemorrhagic_fever);DOID:1287(cardiovascular_system_disease);DOID:1289(neurodegenerative_disease);DOID:13375(temporal_arteritis);DOID:13580(cholestasis);DOID:13608(biliary_atresia);DOID:1575(rheumatic_disease);DOID:178(vascular_disease);DOID:17(musculoskeletal_system_disease);DOID:188…	R-HSA-1015702(Expression of IFN-induced genes);R-HSA-1169406(ISGylation of host proteins);R-HSA-1678841(Regulation of protein ISGylation by ISG15 deconjugating enzyme USP18)	0.682219	2.74426	0.248599	-2.00811	2.66301e-19	1.28307e-17	down	yes
ENSG00000162298	SYVN1	84447	ENST00000377190;ENST00000294256;ENST00000526060;ENST00000530451;ENST00000449943;ENST00000527765;ENST00000531018;ENST00000533685;ENST00000529207;ENST00000525874	GO:0000836(Hrd1p ubiquitin ligase complex);GO:0000839(Hrd1p ubiquitin ligase ERAD-L complex);GO:0002327(immature B cell differentiation);GO:0005515(protein binding);GO:0005654(nucleoplasm);GO:0005737(cytoplasm);GO:0005783(endoplasmic reticulum);GO:0005789(endoplasmic reticulum membrane);GO:0005790(smooth endoplasmic reticulum);GO:0006511(ubiquitin-dependent protein catabolic process);GO:0016020(m…	04120(Ubiquitin mediated proteolysis);04141(Protein processing in endoplasmic reticulum);04141(Protein processing in endoplasmic reticulum)	K10601	EC:2.3.2.27	NA	synoviolin 1 [Source:HGNC Symbol;Acc:HGNC:20738]	protein_coding;retained_intron;processed_transcript	NA	R-HSA-1791084(Expression of SYVN1 (HRD1));R-HSA-5362412(SYVN1 ubiquitinates Hh C-terminal fragments);R-HSA-5362441(C-terminal Hh fragments are recruited to SEL1:SYVN1 at the ER membrane);R-HSA-5362459(VCP-catalyzed ATP hydrolysis promotes the translocation of Hh-C into the cytosol);R-HSA-5387386(Hh processing variants are recruited to SEL1:SYVN at the ER membrane);R-HSA-5387389(Hh processing vari…	7.2066	27.8934	0.258362	-1.95253	2.80161e-19	1.34477e-17	down	yes
ENSG00000115267	IFIH1	64135	ENST00000649979;ENST00000421365;ENST00000464129;ENST00000697291;ENST00000649426;ENST00000679938	GO:0000166(nucleotide binding);GO:0002376(immune system process);GO:0003677(DNA binding);GO:0003723(RNA binding);GO:0003724(RNA helicase activity);GO:0003725(double-stranded RNA binding);GO:0003727(single-stranded RNA binding);GO:0004386(helicase activity);GO:0005515(protein binding);GO:0005524(ATP binding);GO:0005634(nucleus);GO:0005737(cytoplasm);GO:0005739(mitochondrion);GO:0005829(cytosol);GO…	04622(RIG-I-like receptor signaling pathway);05161(Hepatitis B);05162(Measles);05164(Influenza A);05168(Herpes simplex virus 1 infection);05171(Coronavirus disease - COVID-19);05171(Coronavirus disease - COVID-19)	K12647	EC:3.6.4.13	NA	interferon induced with helicase C domain 1 [Source:HGNC Symbol;Acc:HGNC:18873]	protein_coding;retained_intron;nonsense_mediated_decay	DOID:0014667(disease_of_metabolism);DOID:0050013(carbohydrate_metabolism_disease);DOID:0050117(disease_by_infectious_agent);DOID:0050161(lower_respiratory_tract_disease);DOID:0050686(organ_system_cancer);DOID:0050687(cell_type_cancer);DOID:0060005(autoimmune_disease_of_endocrine_system);DOID:0060056(hypersensitivity_reaction_disease);DOID:0060158(acquired_metabolic_disease);DOID:0080000(muscular_…	R-HSA-168909(viral dsRNA:IFIH1, viral dsRNA:K63polyUb-DDX58 bind MAVS);R-HSA-168934(MAVS interacts with RIPK1 and FADD);R-HSA-5696600(USP17 deubiquitinates RCE1, CDC25A, DDX58, IFIH1);R-HSA-913725(viral dsRNA binds IFIH1:TKFC);R-HSA-918225(TBK1/IKK epsilon complex interacts with MAVS bound TRAF3);R-HSA-918227(Recruitment of TRAF3 to MAVS);R-HSA-918229(Phosphorylation and release of IRF3/IRF7);R-H…	6.87003	26.5441	0.258816	-1.95	3.02427e-19	1.44621e-17	down	yes
ENSG00000088325	TPX2	22974	ENST00000300403;ENST00000340513	GO:0000278(mitotic cell cycle);GO:0000922(spindle pole);GO:0005515(protein binding);GO:0005634(nucleus);GO:0005654(nucleoplasm);GO:0005737(cytoplasm);GO:0005819(spindle);GO:0005829(cytosol);GO:0005856(cytoskeleton);GO:0005874(microtubule);GO:0005880(nuclear microtubule);GO:0006915(apoptotic process);GO:0007020(microtubule nucleation);GO:0007026(negative regulation of microtubule depolymerization)…	NA	NA	NA	NA	TPX2 microtubule nucleation factor [Source:HGNC Symbol;Acc:HGNC:1249]	protein_coding	DOID:14566(disease_of_cellular_proliferation);DOID:162(cancer);DOID:4(disease)	R-HSA-6805103(AURKA phosphorylates TP53);R-HSA-8853405(TPX2 binds AURKA at centrosomes);R-HSA-8853419(TPX2 promotes AURKA autophosphorylation)	97.2738	26.7381	3.63802	1.86315	3.2006e-19	1.52482e-17	up	yes
ENSG00000079616	KIF22	3835	ENST00000686384;ENST00000685401;ENST00000689107;ENST00000689660;ENST00000690419;ENST00000691203;ENST00000689221;ENST00000563666;ENST00000685961;ENST00000689415;ENST00000687634;ENST00000690510;ENST00000570173;ENST00000561482;ENST00000691486;ENST00000160827;ENST00000691169;ENST00000689743;ENST00000690258;ENST00000565736;ENST00000688761;ENST00000691895;ENST00000685526;ENST00000689089;ENST00000688492	GO:0000166(nucleotide binding);GO:0000278(mitotic cell cycle);GO:0000776(kinetochore);GO:0000785(chromatin);GO:0003677(DNA binding);GO:0003777(microtubule motor activity);GO:0005515(protein binding);GO:0005524(ATP binding);GO:0005634(nucleus);GO:0005737(cytoplasm);GO:0005819(spindle);GO:0005829(cytosol);GO:0005856(cytoskeleton);GO:0005871(kinesin complex);GO:0005874(microtubule);GO:0006281(DNA re…	04914(Progesterone-mediated oocyte maturation);04914(Progesterone-mediated oocyte maturation)	NA	NA	NA	kinesin family member 22 [Source:HGNC Symbol;Acc:HGNC:6391]	retained_intron;nonsense_mediated_decay;protein_coding;processed_transcript	DOID:0050686(organ_system_cancer);DOID:14566(disease_of_cellular_proliferation);DOID:1612(breast_cancer);DOID:162(cancer);DOID:4(disease);DOID:5093(thoracic_cancer)	R-HSA-2213248(Transport of antigen loaded MHC II molecules to surface);R-HSA-6811423(Retrograde vesicle is tethered at the ER by the NRZ complex and t-SNAREs);R-HSA-6811426(Retrograde COPI vesicles bind kinesin and microtubules);R-HSA-983259(Kinesins move along microtubules consuming ATP);R-HSA-983266(Kinesins bind microtubules);R-HSA-984671(Chromokinesins form dimers)	31.2679	8.57321	3.64716	1.86678	3.48222e-19	1.65282e-17	up	yes
ENSG00000115602	IL1RL1	9173	ENST00000311734;ENST00000409584;ENST00000233954;ENST00000482701	GO:0002113(interleukin-33 binding);GO:0002114(interleukin-33 receptor activity);GO:0002826(negative regulation of T-helper 1 type immune response);GO:0003953(NAD+ nucleosidase activity);GO:0004896(cytokine receptor activity);GO:0004908(interleukin-1 receptor activity);GO:0005515(protein binding);GO:0005576(extracellular region);GO:0005829(cytosol);GO:0005886(plasma membrane);GO:0005925(focal adhe…	04060(Cytokine-cytokine receptor interaction);04060(Cytokine-cytokine receptor interaction)	NA	NA	NA	interleukin 1 receptor like 1 [Source:HGNC Symbol;Acc:HGNC:5998]	protein_coding;processed_transcript	DOID:0050161(lower_respiratory_tract_disease);DOID:0050687(cell_type_cancer);DOID:114(heart_disease);DOID:1176(bronchial_disease);DOID:1184(nephrotic_syndrome);DOID:1287(cardiovascular_system_disease);DOID:14566(disease_of_cellular_proliferation);DOID:1579(respiratory_system_disease);DOID:162(cancer);DOID:16(integumentary_system_disease);DOID:178(vascular_disease);DOID:18(urinary_system_disease);…	R-HSA-2316434(PI3K phosphorylates PIP2 to PIP3);R-HSA-448603(IL33:IL1RL1 binds IL1RAP-1);R-HSA-448629(IL33 binds IL1RL1)	0.285926	1.4453	0.197832	-2.33766	3.50132e-19	1.65574e-17	down	yes
ENSG00000248592	STIMATE-MUSTN1	100526772	ENST00000504329;ENST00000495552	GO:0002062(chondrocyte differentiation);GO:0005634(nucleus);GO:0016020(membrane);GO:0016021(integral component of membrane);GO:0035988(chondrocyte proliferation);GO:0042246(tissue regeneration);GO:0042246(tissue regeneration)	NA	NA	NA	NA	STIMATE-MUSTN1 readthrough [Source:HGNC Symbol;Acc:HGNC:38834]	protein_coding;retained_intron	NA	NA	2.41207	0.577478	4.17691	2.06244	3.57254e-19	1.68318e-17	up	yes
ENSG00000188522	FAM83G	644815	ENST00000388995;ENST00000399096;ENST00000345041;ENST00000580115	GO:0005515(protein binding);GO:0005634(nucleus);GO:0005737(cytoplasm);GO:0005829(cytosol);GO:0007165(signal transduction);GO:0019901(protein kinase binding);GO:0030509(BMP signaling pathway);GO:0030509(BMP signaling pathway)	NA	NA	NA	NA	family with sequence similarity 83 member G [Source:HGNC Symbol;Acc:HGNC:32554]	protein_coding;retained_intron	NA	NA	9.29056	35.5366	0.261436	-1.93547	3.71519e-19	1.74395e-17	down	yes
ENSG00000197355	UAP1L1	91373	ENST00000474787;ENST00000360271;ENST00000409858;ENST00000476184	GO:0003977(UDP-N-acetylglucosamine diphosphorylase activity);GO:0006048(UDP-N-acetylglucosamine biosynthetic process);GO:0016740(transferase activity);GO:0016779(nucleotidyltransferase activity);GO:0070569(uridylyltransferase activity);GO:0070569(uridylyltransferase activity)	00520(Amino sugar and nucleotide sugar metabolism);01100(Metabolic pathways);01100(Metabolic pathways)	K00972	EC:2.7.7.23;EC:2.7.7.83	NA	UDP-N-acetylglucosamine pyrophosphorylase 1 like 1 [Source:HGNC Symbol;Acc:HGNC:28082]	retained_intron;protein_coding;nonsense_mediated_decay	NA	NA	3.97928	15.451	0.257542	-1.95712	3.99272e-19	1.86736e-17	down	yes
ENSG00000111371	SLC38A1	81539	ENST00000398637;ENST00000550173;ENST00000439706;ENST00000548979;ENST00000549049;ENST00000546893;ENST00000551506;ENST00000552197	GO:0001504(neurotransmitter uptake);GO:0003333(amino acid transmembrane transport);GO:0005283(amino acid:sodium symporter activity);GO:0005295(neutral amino acid:sodium symporter activity);GO:0005515(protein binding);GO:0005886(plasma membrane);GO:0005887(integral component of plasma membrane);GO:0006811(ion transport);GO:0006814(sodium ion transport);GO:0006865(amino acid transport);GO:0006868(g…	04724(Glutamatergic synapse);04727(GABAergic synapse);04727(GABAergic synapse)	NA	NA	NA	solute carrier family 38 member 1 [Source:HGNC Symbol;Acc:HGNC:13447]	protein_coding;retained_intron;processed_transcript	NA	R-HSA-212614(Glutamine transport from astrocytes);R-HSA-352119(SLC38A1 (ATA1)-mediated uptake of neutral amino acids)	5.37882	20.5752	0.261423	-1.93554	4.14769e-19	1.93276e-17	down	yes
ENSG00000101400	SNTA1	6640	ENST00000217381	GO:0002027(regulation of heart rate);GO:0003117(regulation of vasoconstriction by circulating norepinephrine);GO:0003779(actin binding);GO:0005198(structural molecule activity);GO:0005515(protein binding);GO:0005516(calmodulin binding);GO:0005737(cytoplasm);GO:0005856(cytoskeleton);GO:0005886(plasma membrane);GO:0006936(muscle contraction);GO:0007528(neuromuscular junction development);GO:0016010…	NA	NA	NA	NA	syntrophin alpha 1 [Source:HGNC Symbol;Acc:HGNC:11167]	protein_coding	DOID:0050177(monogenic_disease);DOID:0050739(autosomal_genetic_disease);DOID:14566(disease_of_cellular_proliferation);DOID:162(cancer);DOID:225(syndrome);DOID:2843(long_QT_syndrome);DOID:4(disease);DOID:630(genetic_disease)	NA	13.3016	3.44611	3.8599	1.94856	5.07859e-19	2.35794e-17	up	yes
ENSG00000175155	YPEL2	388403	ENST00000312655;ENST00000672916;ENST00000582192	GO:0005515(protein binding);GO:0005634(nucleus);GO:0005730(nucleolus);GO:0046872(metal ion binding);GO:0046872(metal ion binding)	NA	NA	NA	NA	yippee like 2 [Source:HGNC Symbol;Acc:HGNC:18326]	protein_coding;retained_intron	NA	NA	0.182574	0.925102	0.197355	-2.34113	5.10202e-19	2.36024e-17	down	yes
ENSG00000272884	ENSG00000272884		ENST00000575331	NA	NA	NA	NA	NA	novel transcript	lncRNA	NA	NA	0.203486	1.12631	0.180666	-2.4686	5.2686e-19	2.4285e-17	down	yes
ENSG00000104889	RNASEH2A	10535	ENST00000221486;ENST00000593017;ENST00000643757;ENST00000590279;ENST00000590121	GO:0003676(nucleic acid binding);GO:0003723(RNA binding);GO:0004518(nuclease activity);GO:0004519(endonuclease activity);GO:0004523(RNA-DNA hybrid ribonuclease activity);GO:0004540(ribonuclease activity);GO:0005634(nucleus);GO:0005654(nucleoplasm);GO:0005829(cytosol);GO:0006260(DNA replication);GO:0006298(mismatch repair);GO:0006401(RNA catabolic process);GO:0016070(RNA metabolic process);GO:0016…	03030(DNA replication);03030(DNA replication)	K10743	EC:3.1.26.4	NA	ribonuclease H2 subunit A [Source:HGNC Symbol;Acc:HGNC:18518]	protein_coding;retained_intron	DOID:225(syndrome);DOID:4(disease)	NA	60.6154	16.6483	3.64093	1.86431	5.36244e-19	2.46286e-17	up	yes
ENSG00000152990	ADGRA3	166647	ENST00000334304;ENST00000506155;ENST00000502482;ENST00000499527	GO:0004888(transmembrane signaling receptor activity);GO:0004930(G protein-coupled receptor activity);GO:0005515(protein binding);GO:0005886(plasma membrane);GO:0007165(signal transduction);GO:0007166(cell surface receptor signaling pathway);GO:0007186(G protein-coupled receptor signaling pathway);GO:0009897(external side of plasma membrane);GO:0016020(membrane);GO:0016021(integral component of m…	NA	NA	NA	NA	adhesion G protein-coupled receptor A3 [Source:HGNC Symbol;Acc:HGNC:13839]	protein_coding;processed_transcript;retained_intron	NA	NA	1.74105	0.423405	4.11202	2.03985	5.94432e-19	2.72033e-17	up	yes
ENSG00000198901	PRC1	9055	ENST00000394249;ENST00000442656;ENST00000361188;ENST00000556982;ENST00000559326;ENST00000555455;ENST00000560914;ENST00000559828;ENST00000556972;ENST00000557763;ENST00000553494;ENST00000417173;ENST00000555745;ENST00000560423	GO:0000022(mitotic spindle elongation);GO:0000226(microtubule cytoskeleton organization);GO:0000922(spindle pole);GO:0001578(microtubule bundle formation);GO:0005515(protein binding);GO:0005634(nucleus);GO:0005654(nucleoplasm);GO:0005694(chromosome);GO:0005737(cytoplasm);GO:0005819(spindle);GO:0005829(cytosol);GO:0005856(cytoskeleton);GO:0005874(microtubule);GO:0005876(spindle microtubule);GO:000…	NA	NA	NA	NA	protein regulator of cytokinesis 1 [Source:HGNC Symbol;Acc:HGNC:9341]	protein_coding;retained_intron;processed_transcript	DOID:14566(disease_of_cellular_proliferation);DOID:162(cancer);DOID:4(disease)	R-HSA-5671970(Activated CIT binds KIF14 and PRC1)	31.7294	8.77217	3.61705	1.85482	6.18121e-19	2.81863e-17	up	yes
ENSG00000254806	SYS1-DBNDD2	767557	ENST00000419593;ENST00000452133;ENST00000475242;ENST00000458187	GO:0016020(membrane);GO:0016021(integral component of membrane);GO:0016021(integral component of membrane)	NA	NA	NA	NA	SYS1-DBNDD2 readthrough (NMD candidate) [Source:HGNC Symbol;Acc:HGNC:33535]	nonsense_mediated_decay;processed_transcript	NA	NA	2.44051	10.7354	0.227333	-2.13712	6.7778e-19	3.07968e-17	down	yes
ENSG00000132530	XAF1	54739	ENST00000361842;ENST00000576459;ENST00000573760;ENST00000575147;ENST00000574907;ENST00000575369;ENST00000575267;ENST00000573518;ENST00000576724;ENST00000346752;ENST00000572546	GO:0005515(protein binding);GO:0005634(nucleus);GO:0005654(nucleoplasm);GO:0005737(cytoplasm);GO:0005739(mitochondrion);GO:0005829(cytosol);GO:0006915(apoptotic process);GO:0008270(zinc ion binding);GO:0035456(response to interferon-beta);GO:0046872(metal ion binding);GO:0046872(metal ion binding)	NA	NA	NA	NA	XIAP associated factor 1 [Source:HGNC Symbol;Acc:HGNC:30932]	protein_coding;processed_transcript;retained_intron;nonsense_mediated_decay	DOID:0050686(organ_system_cancer);DOID:0050687(cell_type_cancer);DOID:0060083(immune_system_cancer);DOID:1036(chronic_leukemia);DOID:1037(lymphoblastic_leukemia);DOID:1040(chronic_lymphocytic_leukemia);DOID:1240(leukemia);DOID:14566(disease_of_cellular_proliferation);DOID:162(cancer);DOID:1909(melanoma);DOID:2531(hematologic_cancer);DOID:263(kidney_cancer);DOID:3996(urinary_system_cancer);DOID:44…	R-HSA-1015702(Expression of IFN-induced genes)	1.54441	6.13514	0.251732	-1.99004	7.40716e-19	3.35371e-17	down	yes
ENSG00000106105	GARS1	2617	ENST00000675587;ENST00000675886;ENST00000676088;ENST00000674643;ENST00000444666;ENST00000465748;ENST00000454308;ENST00000674737;ENST00000470392;ENST00000485784;ENST00000674734;ENST00000496643;ENST00000675529;ENST00000676210;ENST00000675025	GO:0000166(nucleotide binding);GO:0004081(bis(5'-nucleosyl)-tetraphosphatase (asymmetrical) activity);GO:0004812(aminoacyl-tRNA ligase activity);GO:0004820(glycine-tRNA ligase activity);GO:0005515(protein binding);GO:0005524(ATP binding);GO:0005576(extracellular region);GO:0005737(cytoplasm);GO:0005739(mitochondrion);GO:0005759(mitochondrial matrix);GO:0005829(cytosol);GO:0006412(translation);GO:…	00970(Aminoacyl-tRNA biosynthesis);00970(Aminoacyl-tRNA biosynthesis)	K01880	EC:6.1.1.14	NA	glycyl-tRNA synthetase 1 [Source:HGNC Symbol;Acc:HGNC:4162]	retained_intron;nonsense_mediated_decay;protein_coding	DOID:0080000(muscular_disease);DOID:10595(Charcot_Marie_Tooth_disease);DOID:12377(spinal_muscular_atrophy);DOID:1289(neurodegenerative_disease);DOID:17(musculoskeletal_system_disease);DOID:231(motor_neuron_disease);DOID:331(central_nervous_system_disease);DOID:423(myopathy);DOID:440(neuromuscular_disease);DOID:4(disease);DOID:66(muscle_tissue_disease);DOID:767(muscular_atrophy);DOID:7(disease_of_…	R-HSA-380048(glycine + tRNA(Gly) + ATP => Gly-tRNA(Gly) + AMP + pyrophosphate);R-HSA-380240(glycine + tRNA(Gly) + ATP => Gly-tRNA(Gly) + AMP + pyrophosphate)	6.19503	23.3546	0.26526	-1.91452	7.75505e-19	3.49881e-17	down	yes
ENSG00000055732	MCOLN3	55283	ENST00000370589;ENST00000474447;ENST00000475312;ENST00000341115;ENST00000490600;ENST00000370587	GO:0000421(autophagosome membrane);GO:0005261(cation channel activity);GO:0005262(calcium channel activity);GO:0005737(cytoplasm);GO:0005764(lysosome);GO:0005765(lysosomal membrane);GO:0005768(endosome);GO:0005886(plasma membrane);GO:0006811(ion transport);GO:0007626(locomotory behavior);GO:0008289(lipid binding);GO:0016020(membrane);GO:0016021(integral component of membrane);GO:0031410(cytoplasm…	04020(Calcium signaling pathway);04020(Calcium signaling pathway)	NA	NA	NA	mucolipin TRP cation channel 3 [Source:HGNC Symbol;Acc:HGNC:13358]	protein_coding;processed_transcript;nonsense_mediated_decay	NA	R-HSA-3295579(TRPs transport extracellular Ca2+ to cytosol)	0.427999	1.93659	0.221007	-2.17784	7.89966e-19	3.55151e-17	down	yes
ENSG00000092098	RNF31	55072	ENST00000560787;ENST00000699887;ENST00000557878;ENST00000699885;ENST00000699882;ENST00000558452;ENST00000324103;ENST00000699890;ENST00000558907;ENST00000560631;ENST00000483895;ENST00000559491;ENST00000559533;ENST00000560342;ENST00000699883;ENST00000699884;ENST00000699892;ENST00000559583;ENST00000699891;ENST00000559882;ENST00000699889;ENST00000699886;ENST00000559071;ENST00000699888;ENST00000560875…	GO:0000209(protein polyubiquitination);GO:0004842(ubiquitin-protein transferase activity);GO:0005515(protein binding);GO:0005737(cytoplasm);GO:0005829(cytosol);GO:0009898(cytoplasmic side of plasma membrane);GO:0016567(protein ubiquitination);GO:0016740(transferase activity);GO:0023035(CD40 signaling pathway);GO:0031625(ubiquitin protein ligase binding);GO:0035631(CD40 receptor complex);GO:003643…	04217(Necroptosis);04621(NOD-like receptor signaling pathway);05131(Shigellosis);05131(Shigellosis)	K11974	EC:2.3.2.31	NA	ring finger protein 31 [Source:HGNC Symbol;Acc:HGNC:16031]	protein_coding;nonsense_mediated_decay;processed_transcript;retained_intron	NA	R-HSA-5357776(TNF:TNFR1:TRADD:TRAF2:K63polyUb-RIPK1:BIRC2,3:LUBAC recruits IKKA:IKBKB:IKBKG);R-HSA-5357904(TNF:TNFR1:TRADD:TRAF2:RIPK1 binds LUBAC);R-HSA-5661517(LUBAC comlex binds OTULIN);R-HSA-9793679(LUBAC ubiquitinates RIPK1 at K627);R-HSA-9793680(OPTN binds polyUb-RIPK1 within the TNFR1 complex);R-HSA-9793988(LUBAC ubiquitinates CFLAR at K351, K353);R-HSA-9794008(LUBAC binds CFLAR);R-HSA-979…	5.84518	1.53967	3.79639	1.92463	8.21947e-19	3.68232e-17	up	yes
ENSG00000128567	PODXL	5420	ENST00000446198;ENST00000378555;ENST00000490761;ENST00000322985;ENST00000484346	GO:0001726(ruffle);GO:0005515(protein binding);GO:0005615(extracellular space);GO:0005730(nucleolus);GO:0005737(cytoplasm);GO:0005886(plasma membrane);GO:0005887(integral component of plasma membrane);GO:0005902(microvillus);GO:0007155(cell adhesion);GO:0007162(negative regulation of cell adhesion);GO:0016020(membrane);GO:0016021(integral component of membrane);GO:0016324(apical plasma membrane);…	05132(Salmonella infection);05132(Salmonella infection)	NA	NA	NA	podocalyxin like [Source:HGNC Symbol;Acc:HGNC:9171]	nonsense_mediated_decay;protein_coding;retained_intron	DOID:0050686(organ_system_cancer);DOID:0050687(cell_type_cancer);DOID:10155(intestinal_cancer);DOID:14566(disease_of_cellular_proliferation);DOID:1520(colon_carcinoma);DOID:162(cancer);DOID:2154(nephroblastoma);DOID:219(colon_cancer);DOID:263(kidney_cancer);DOID:2994(germ_cell_cancer);DOID:299(adenocarcinoma);DOID:305(carcinoma);DOID:3119(gastrointestinal_system_cancer);DOID:3308(embryonal_carcin…	NA	2.35935	9.09446	0.259427	-1.9466	9.43986e-19	4.21427e-17	down	yes
ENSG00000112118	MCM3	4172	ENST00000596288;ENST00000616552;ENST00000421471;ENST00000476448	GO:0000166(nucleotide binding);GO:0000727(double-strand break repair via break-induced replication);GO:0000781(chromosome, telomeric region);GO:0003677(DNA binding);GO:0003678(DNA helicase activity);GO:0003697(single-stranded DNA binding);GO:0004386(helicase activity);GO:0005515(protein binding);GO:0005524(ATP binding);GO:0005634(nucleus);GO:0005654(nucleoplasm);GO:0005658(alpha DNA polymerase:pr…	03030(DNA replication);04110(Cell cycle);04110(Cell cycle)	K02541	EC:3.6.4.12	NA	minichromosome maintenance complex component 3 [Source:HGNC Symbol;Acc:HGNC:6945]	protein_coding;processed_transcript	DOID:0050177(monogenic_disease);DOID:0050686(organ_system_cancer);DOID:0050687(cell_type_cancer);DOID:0050737(autosomal_recessive_disease);DOID:0050739(autosomal_genetic_disease);DOID:12704(ataxia_telangiectasia);DOID:1319(brain_cancer);DOID:14566(disease_of_cellular_proliferation);DOID:162(cancer);DOID:170(endocrine_gland_cancer);DOID:171(neuroectodermal_tumor);DOID:1781(thyroid_cancer);DOID:299…	R-HSA-169468(MCM2-7 mediated fork unwinding);R-HSA-176298(Activation of claspin);R-HSA-176318(Loading of claspin onto DNA during replication origin firing);R-HSA-176942(Multiple proteins are localized at replication fork);R-HSA-68914(DNA polymerase alpha:primase binds at the origin);R-HSA-68916(DNA Replication Factor A (RPA) associates with the pre-replicative complex at the origin);R-HSA-68917(C…	92.4165	25.8905	3.56951	1.83573	9.75086e-19	4.33794e-17	up	yes
ENSG00000168488	ATXN2L	11273	ENST00000570200;ENST00000395547;ENST00000336783;ENST00000340394;ENST00000568266;ENST00000382686;ENST00000562583;ENST00000563314;ENST00000325215;ENST00000564304;ENST00000561732;ENST00000562867;ENST00000564656;ENST00000566007;ENST00000564284;ENST00000567024;ENST00000564035;ENST00000561539;ENST00000565971;ENST00000564162;ENST00000570284;ENST00000566080;ENST00000562686	GO:0003723(RNA binding);GO:0005515(protein binding);GO:0005634(nucleus);GO:0005737(cytoplasm);GO:0005829(cytosol);GO:0010494(cytoplasmic stress granule);GO:0016020(membrane);GO:0016021(integral component of membrane);GO:0016071(mRNA metabolic process);GO:0016607(nuclear speck);GO:0034063(stress granule assembly);GO:0045296(cadherin binding);GO:0045296(cadherin binding)	05014(Amyotrophic lateral sclerosis);05017(Spinocerebellar ataxia);05022(Pathways of neurodegeneration - multiple diseases);05022(Pathways of neurodegeneration - multiple diseases)	NA	NA	NA	ataxin 2 like [Source:HGNC Symbol;Acc:HGNC:31326]	protein_coding;nonsense_mediated_decay;retained_intron;processed_transcript	NA	NA	20.8096	78.0242	0.266707	-1.90667	1.03234e-18	4.57671e-17	down	yes
ENSG00000170442	KRT86	3892	ENST00000423955;ENST00000553310;ENST00000293525	GO:0005515(protein binding);GO:0005615(extracellular space);GO:0005829(cytosol);GO:0005882(intermediate filament);GO:0030280(structural constituent of skin epidermis);GO:0031424(keratinization);GO:0045095(keratin filament);GO:0045109(intermediate filament organization);GO:0045109(intermediate filament organization)	NA	NA	NA	NA	keratin 86 [Source:HGNC Symbol;Acc:HGNC:6463]	protein_coding	NA	R-HSA-6805546(Keratin type I binds keratin type II);R-HSA-6805573(Keratin type I/type II heterodimers form tetramers);R-HSA-6806610(Keratin filament formation);R-HSA-6806613(Keratin tetramers bind to form unit length filaments);R-HSA-6806629(Formation of tonofilament bundles);R-HSA-6809393(Keratin filaments bind cell-cell adhesion complexes);R-HSA-6809663(Formation of hair keratin fibres);R-HSA-6…	2.81431	0.577377	4.8743	2.28519	1.09491e-18	4.83733e-17	up	yes
ENSG00000173894	CBX2	84733	ENST00000310942;ENST00000269399;ENST00000571484	GO:0000122(negative regulation of transcription by RNA polymerase II);GO:0000791(euchromatin);GO:0000792(heterochromatin);GO:0003677(DNA binding);GO:0003682(chromatin binding);GO:0005515(protein binding);GO:0005634(nucleus);GO:0005654(nucleoplasm);GO:0005694(chromosome);GO:0006325(chromatin organization);GO:0007548(sex differentiation);GO:0030154(cell differentiation);GO:0031519(PcG protein compl…	NA	NA	NA	NA	chromobox 2 [Source:HGNC Symbol;Acc:HGNC:1552]	protein_coding;retained_intron	NA	R-HSA-3108203(PRC1 SUMOylates CTBP1 with SUMO2,3);R-HSA-3108209(PRC1 SUMOylates CTBP1 with SUMO1);R-HSA-3223200(Demethylation of H3K27Me3 by KDM6B stimulates p16INK4A transcription, while binding of PRC1.4 complex to H3K27Me3 represses p16INK4A transcription);R-HSA-3229089(PRC1.4 complex binds H3K27Me3 nucleosomes on CDKN2A promoter);R-HSA-3229102(p-MAPKAPK3 phosphorylates BMI1);R-HSA-3927824(PRC…	9.05719	2.46216	3.67856	1.87914	1.33321e-18	5.8698e-17	up	yes
ENSG00000113657	DPYSL3	1809	ENST00000343218;ENST00000398514;ENST00000508042;ENST00000504965;ENST00000512722	GO:0005515(protein binding);GO:0005615(extracellular space);GO:0005737(cytoplasm);GO:0005829(cytosol);GO:0010975(regulation of neuron projection development);GO:0010976(positive regulation of neuron projection development);GO:0010977(negative regulation of neuron projection development);GO:0016787(hydrolase activity);GO:0016810(hydrolase activity, acting on carbon-nitrogen (but not peptide) bonds…	NA	NA	NA	NA	dihydropyrimidinase like 3 [Source:HGNC Symbol;Acc:HGNC:3015]	protein_coding;retained_intron;processed_transcript	DOID:14566(disease_of_cellular_proliferation);DOID:162(cancer);DOID:225(syndrome);DOID:4(disease)	R-HSA-399944(Phosphorylation of CRMPs by Cdk5);R-HSA-399947(Tyrosine phosphorylation of CRMPs by Fes);R-HSA-399951(Phosphorylation of CRMPs by GSK3beta)	25.6082	7.18638	3.56344	1.83327	1.35282e-18	5.93565e-17	up	yes
ENSG00000171241	SHCBP1	79801	ENST00000303383;ENST00000567698;ENST00000563219;ENST00000569702;ENST00000564272;ENST00000565887;ENST00000566016	GO:0005515(protein binding);GO:0005737(cytoplasm);GO:0005819(spindle);GO:0005856(cytoskeleton);GO:0008543(fibroblast growth factor receptor signaling pathway);GO:0030496(midbody);GO:0042169(SH2 domain binding);GO:2000177(regulation of neural precursor cell proliferation);GO:2000177(regulation of neural precursor cell proliferation)	NA	NA	NA	NA	SHC binding and spindle associated 1 [Source:HGNC Symbol;Acc:HGNC:29547]	protein_coding;retained_intron;processed_transcript	NA	NA	6.62428	1.78011	3.72128	1.8958	1.42089e-18	6.203e-17	up	yes
ENSG00000161547	SRSF2	6427	ENST00000359995;ENST00000452355;ENST00000582449;ENST00000392485;ENST00000585202;ENST00000508921;ENST00000586778;ENST00000592676;ENST00000589919	GO:0000381(regulation of alternative mRNA splicing, via spliceosome);GO:0000398(mRNA splicing, via spliceosome);GO:0003676(nucleic acid binding);GO:0003714(transcription corepressor activity);GO:0003723(RNA binding);GO:0005515(protein binding);GO:0005634(nucleus);GO:0005654(nucleoplasm);GO:0005737(cytoplasm);GO:0005829(cytosol);GO:0006397(mRNA processing);GO:0008380(RNA splicing);GO:0016607(nucle…	03040(Spliceosome);05168(Herpes simplex virus 1 infection);05168(Herpes simplex virus 1 infection)	NA	NA	NA	serine and arginine rich splicing factor 2 [Source:HGNC Symbol;Acc:HGNC:10783]	protein_coding;nonsense_mediated_decay;retained_intron	DOID:0014667(disease_of_metabolism);DOID:3652(Leigh_disease);DOID:4(disease);DOID:655(inherited_metabolic_disorder);DOID:700(mitochondrial_metabolism_disease)	R-HSA-156661(Formation of Exon Junction Complex);R-HSA-159101(NXF1:NXT1 (TAP:p15) binds capped mRNA:CBC:EJC:TREX (minus DDX39B));R-HSA-72107(Formation of the Spliceosomal E complex);R-HSA-72124(Formation of the Spliceosomal A Complex);R-HSA-72127(Formation of the Spliceosomal B Complex);R-HSA-72130(Formation of an intermediate Spliceosomal C complex);R-HSA-72139(Formation of the active Spliceosom…	131.177	37.0104	3.54434	1.82552	1.42346e-18	6.203e-17	up	yes
ENSG00000175567	UCP2	7351	ENST00000663595;ENST00000543714;ENST00000310473;ENST00000545562;ENST00000544615;ENST00000541027;ENST00000539330;ENST00000536983	GO:0000303(response to superoxide);GO:0001666(response to hypoxia);GO:0005515(protein binding);GO:0005737(cytoplasm);GO:0005739(mitochondrion);GO:0005743(mitochondrial inner membrane);GO:0006839(mitochondrial transport);GO:0007565(female pregnancy);GO:0007568(aging);GO:0009409(response to cold);GO:0009749(response to glucose);GO:0010942(positive regulation of cell death);GO:0016020(membrane);GO:0…	NA	NA	NA	NA	uncoupling protein 2 [Source:HGNC Symbol;Acc:HGNC:12518]	protein_coding;retained_intron;processed_transcript	DOID:0014667(disease_of_metabolism);DOID:0050013(carbohydrate_metabolism_disease);DOID:0050155(sensory_system_disease);DOID:0050828(artery_disease);DOID:0060158(acquired_metabolic_disease);DOID:10763(hypertension);DOID:114(heart_disease);DOID:1287(cardiovascular_system_disease);DOID:13207(proliferative_diabetic_retinopathy);DOID:1428(endocrine_pancreas_disease);DOID:14566(disease_of_cellular_prol…	R-HSA-166214(FA anion flip-flops to the opposite surface);R-HSA-166220(FA anion diffuses laterally to UCP);R-HSA-166387(The FA anion diffuses away laterally from UCP);R-HSA-170026(Protons are translocated from the intermembrane space to the matrix)	10.6452	2.80206	3.79907	1.92565	1.44297e-18	6.26662e-17	up	yes
ENSG00000110721	CHKA	1119	ENST00000265689;ENST00000530730;ENST00000533910;ENST00000533728;ENST00000525155;ENST00000356135;ENST00000531341	GO:0000166(nucleotide binding);GO:0004103(choline kinase activity);GO:0004104(cholinesterase activity);GO:0004305(ethanolamine kinase activity);GO:0004712(protein serine/threonine/tyrosine kinase activity);GO:0004713(protein tyrosine kinase activity);GO:0005524(ATP binding);GO:0005737(cytoplasm);GO:0005811(lipid droplet);GO:0005829(cytosol);GO:0006629(lipid metabolic process);GO:0006646(phosphati…	00564(Glycerophospholipid metabolism);01100(Metabolic pathways);05231(Choline metabolism in cancer);05231(Choline metabolism in cancer)	K14156	EC:2.7.1.32;EC:2.7.1.82	NA	choline kinase alpha [Source:HGNC Symbol;Acc:HGNC:1937]	protein_coding;processed_transcript;retained_intron;nonsense_mediated_decay	DOID:14566(disease_of_cellular_proliferation);DOID:162(cancer);DOID:4(disease)	R-HSA-1483004(Cho is phosphorylated to PCho by CHK dimer);R-HSA-1483222(ETA is phosphorylated to PETA by CHK/ETNK)	4.64316	17.7007	0.262314	-1.93063	1.52167e-18	6.58602e-17	down	yes
ENSG00000130827	PLXNA3	55558	ENST00000369682;ENST00000478236;ENST00000467463;ENST00000493546;ENST00000497802;ENST00000480645;ENST00000491066;ENST00000482598	GO:0002116(semaphorin receptor complex);GO:0005515(protein binding);GO:0005886(plasma membrane);GO:0005887(integral component of plasma membrane);GO:0007162(negative regulation of cell adhesion);GO:0007165(signal transduction);GO:0007411(axon guidance);GO:0008360(regulation of cell shape);GO:0016020(membrane);GO:0016021(integral component of membrane);GO:0017154(semaphorin receptor activity);GO:0…	04360(Axon guidance);04360(Axon guidance)	NA	NA	NA	plexin A3 [Source:HGNC Symbol;Acc:HGNC:9101]	protein_coding;retained_intron;processed_transcript	NA	R-HSA-399928(Recruitment of Rnd1 to Plexin A);R-HSA-399930(Activation of PAK by Rac1);R-HSA-399931(Activation of Fyn);R-HSA-399933(Sema3A binds Nrp-1 bound to PlexinA);R-HSA-399934(Phosphorylation of Plexin-A);R-HSA-399935(Inactivation of R-Ras by Sema3A-Plexin-A GAP activity);R-HSA-399939(Autophosphorylation of PAK);R-HSA-399941(Rac1 binds PlexinA);R-HSA-399942(Plexin-A1-4 binds NRP1);R-HSA-3999…	2.29245	8.66547	0.26455	-1.91839	1.60999e-18	6.94471e-17	down	yes
ENSG00000160886	LY6K	54742	ENST00000519387;ENST00000292430;ENST00000522591;ENST00000518841;ENST00000519390	GO:0001669(acrosomal vesicle);GO:0005576(extracellular region);GO:0005737(cytoplasm);GO:0005886(plasma membrane);GO:0007339(binding of sperm to zona pellucida);GO:0016020(membrane);GO:0031225(anchored component of membrane);GO:0031410(cytoplasmic vesicle);GO:0045121(membrane raft);GO:0045121(membrane raft)	NA	NA	NA	NA	lymphocyte antigen 6 family member K [Source:HGNC Symbol;Acc:HGNC:24225]	protein_coding;processed_transcript	NA	R-HSA-8940388(GPLD1 hydrolyses GPI-anchors from proteins)	41.6736	11.7379	3.55034	1.82796	1.77044e-18	7.61112e-17	up	yes
ENSG00000183709	IFNL2	282616	ENST00000331982	GO:0002385(mucosal immune response);GO:0005102(signaling receptor binding);GO:0005125(cytokine activity);GO:0005576(extracellular region);GO:0005615(extracellular space);GO:0007259(receptor signaling pathway via JAK-STAT);GO:0038196(type III interferon signaling pathway);GO:0045087(innate immune response);GO:0050778(positive regulation of immune response);GO:0051607(defense response to virus);GO:…	04060(Cytokine-cytokine receptor interaction);04630(JAK-STAT signaling pathway)	NA	NA	NA	interferon lambda 2 [Source:HGNC Symbol;Acc:HGNC:18364]	protein_coding	NA	R-HSA-8987105(IFNL2,IFNL3 bind IL10RB:TYK2 and IFNLR1:JAK1)	0.950205	5.46138	0.173986	-2.52296	1.87139e-18	8.01809e-17	down	yes
ENSG00000149527	PLCH2	9651	ENST00000278878;ENST00000449969;ENST00000473964;ENST00000343889	GO:0004435(phosphatidylinositol phospholipase C activity);GO:0004629(phospholipase C activity);GO:0005509(calcium ion binding);GO:0005575(cellular_component);GO:0005737(cytoplasm);GO:0005886(plasma membrane);GO:0006629(lipid metabolic process);GO:0007165(signal transduction);GO:0008081(phosphoric diester hydrolase activity);GO:0016020(membrane);GO:0016042(lipid catabolic process);GO:0016787(hydro…	00562(Inositol phosphate metabolism);01100(Metabolic pathways);01100(Metabolic pathways)	K19006	EC:3.1.4.11	NA	phospholipase C eta 2 [Source:HGNC Symbol;Acc:HGNC:29037]	protein_coding;retained_intron	NA	R-HSA-1855221(PI(4,5)P2 is hydrolysed to I(1,4,5)P3 and DAG by tethered PLC[1] at the plasma membrane)	5.72701	1.59709	3.58591	1.84234	2.56994e-18	1.09742e-16	up	yes
ENSG00000244257	PKD1P1	339044	ENST00000458669	NA	NA	NA	NA	NA	polycystin 1, transient receptor potential channel interacting pseudogene 1 [Source:HGNC Symbol;Acc:HGNC:30065]	unprocessed_pseudogene	NA	NA	1.58445	6.11324	0.259184	-1.94795	2.92674e-18	1.24562e-16	down	yes
ENSG00000183889	ENSG00000183889		ENST00000537112;ENST00000381497;ENST00000541593;ENST00000331436;ENST00000536260;ENST00000537085;ENST00000540039;ENST00000524823;ENST00000283050;ENST00000534258;ENST00000535961	GO:0005654(nucleoplasm);GO:0005654(nucleoplasm)	NA	NA	NA	NA	novel member of the nuclear pore complex interacting protein NPIP gene family	processed_transcript;protein_coding;retained_intron	NA	NA	0.496823	2.10257	0.236293	-2.08135	3.03947e-18	1.2893e-16	down	yes
ENSG00000073756	PTGS2	5743	ENST00000367468;ENST00000466691	GO:0001516(prostaglandin biosynthetic process);GO:0001525(angiogenesis);GO:0004601(peroxidase activity);GO:0004666(prostaglandin-endoperoxide synthase activity);GO:0005515(protein binding);GO:0005634(nucleus);GO:0005637(nuclear inner membrane);GO:0005640(nuclear outer membrane);GO:0005737(cytoplasm);GO:0005783(endoplasmic reticulum);GO:0005788(endoplasmic reticulum lumen);GO:0005789(endoplasmic r…	00590(Arachidonic acid metabolism);01100(Metabolic pathways);04064(NF-kappa B signaling pathway);04370(VEGF signaling pathway);04625(C-type lectin receptor signaling pathway);04657(IL-17 signaling pathway);04668(TNF signaling pathway);04723(Retrograde endocannabinoid signaling);04726(Serotonergic synapse);04913(Ovarian steroidogenesis);04921(Oxytocin signaling pathway);04923(Regulation of lipolys…	K11987	EC:1.14.99.1	NA	prostaglandin-endoperoxide synthase 2 [Source:HGNC Symbol;Acc:HGNC:9605]	protein_coding;retained_intron	DOID:0002116(pterygium);DOID:0014667(disease_of_metabolism);DOID:0050013(carbohydrate_metabolism_disease);DOID:0050117(disease_by_infectious_agent);DOID:0050155(sensory_system_disease);DOID:0050161(lower_respiratory_tract_disease);DOID:0050177(monogenic_disease);DOID:0050338(primary_bacterial_infectious_disease);DOID:0050615(respiratory_system_cancer);DOID:0050624(gastrointestinal_system_benign_n…	R-HSA-2161951(Arachidonic acid is oxidised to 15R-HETE by Acetyl-PTGS2);R-HSA-2309773(PGG2 is reduced to PGH2 by PTGS2);R-HSA-2309779(PTGS2 dimer binds PTGS2 inhibitors);R-HSA-2309787(Arachidonic acid is oxidised to PGG2 by PTGS2);R-HSA-2314686(ASA- acetylates PTGS2);R-HSA-6790029(Expression of PTGS2);R-HSA-9018880(Ac-PTGS2 dimer oxidises EPA to 18(R)-HpEPE or 18(S)-HpEPE);R-HSA-9020261(Ac-PTGS2 …	0.571326	2.46088	0.232164	-2.10678	3.09876e-18	1.3101e-16	down	yes
ENSG00000090889	KIF4A	24137	ENST00000374403;ENST00000485406	GO:0000166(nucleotide binding);GO:0000281(mitotic cytokinesis);GO:0003677(DNA binding);GO:0003777(microtubule motor activity);GO:0005515(protein binding);GO:0005524(ATP binding);GO:0005634(nucleus);GO:0005654(nucleoplasm);GO:0005694(chromosome);GO:0005737(cytoplasm);GO:0005819(spindle);GO:0005829(cytosol);GO:0005856(cytoskeleton);GO:0005874(microtubule);GO:0005876(spindle microtubule);GO:0006996(…	NA	NA	NA	NA	kinesin family member 4A [Source:HGNC Symbol;Acc:HGNC:13339]	protein_coding;processed_transcript	DOID:0050177(monogenic_disease);DOID:0050736(autosomal_dominant_disease);DOID:0050739(autosomal_genetic_disease);DOID:4(disease);DOID:5683(hereditary_breast_ovarian_cancer);DOID:630(genetic_disease)	R-HSA-2213248(Transport of antigen loaded MHC II molecules to surface);R-HSA-445071(Reinsertion of L1 into the plasma membrane);R-HSA-445077(Transport of L1 from C-domain to P-domain);R-HSA-6811423(Retrograde vesicle is tethered at the ER by the NRZ complex and t-SNAREs);R-HSA-6811426(Retrograde COPI vesicles bind kinesin and microtubules);R-HSA-983259(Kinesins move along microtubules consuming A…	21.0709	5.96409	3.53296	1.82088	3.49069e-18	1.47093e-16	up	yes
ENSG00000134690	CDCA8	55143	ENST00000327331;ENST00000373055	GO:0000070(mitotic sister chromatid segregation);GO:0000278(mitotic cell cycle);GO:0000281(mitotic cytokinesis);GO:0000775(chromosome, centromeric region);GO:0001934(positive regulation of protein phosphorylation);GO:0005515(protein binding);GO:0005634(nucleus);GO:0005654(nucleoplasm);GO:0005694(chromosome);GO:0005730(nucleolus);GO:0005737(cytoplasm);GO:0005819(spindle);GO:0005829(cytosol);GO:000…	NA	NA	NA	NA	cell division cycle associated 8 [Source:HGNC Symbol;Acc:HGNC:14629]	protein_coding	DOID:14566(disease_of_cellular_proliferation);DOID:162(cancer);DOID:4(disease)	R-HSA-141409(Mad1 binds kinetochore);R-HSA-141422(MAD2 converted to an inhibitory state via interaction with Mad1);R-HSA-141431(MAD2 associates with the Mad1 kinetochore complex);R-HSA-141439(Release of activated MAD2 from kinetochores);R-HSA-1638803(Phosphorylation of cohesin by PLK1 at centromeres);R-HSA-1638821(PP2A-B56 dephosphorylates centromeric cohesin);R-HSA-2467809(ESPL1 (Separase) cleav…	69.5218	19.8285	3.50615	1.80989	3.57884e-18	1.50311e-16	up	yes
ENSG00000119917	IFIT3	3437	ENST00000371818;ENST00000371811;ENST00000679781;ENST00000681277;ENST00000679923;ENST00000679583;ENST00000679438;ENST00000680037;ENST00000681207;ENST00000679897	GO:0002376(immune system process);GO:0003674(molecular_function);GO:0003723(RNA binding);GO:0005515(protein binding);GO:0005737(cytoplasm);GO:0005739(mitochondrion);GO:0005829(cytosol);GO:0008285(negative regulation of cell population proliferation);GO:0009615(response to virus);GO:0035457(cellular response to interferon-alpha);GO:0042802(identical protein binding);GO:0043066(negative regulation …	NA	NA	NA	NA	interferon induced protein with tetratricopeptide repeats 3 [Source:HGNC Symbol;Acc:HGNC:5411]	protein_coding	NA	R-HSA-1015702(Expression of IFN-induced genes)	13.3979	49.2721	0.271917	-1.87876	3.62943e-18	1.51936e-16	down	yes
ENSG00000161800	RACGAP1	29127	ENST00000312377;ENST00000454520;ENST00000551016;ENST00000548158;ENST00000546723;ENST00000550149;ENST00000552310;ENST00000548824;ENST00000548961;ENST00000546786;ENST00000547905;ENST00000546764;ENST00000548644	GO:0000281(mitotic cytokinesis);GO:0000915(actomyosin contractile ring assembly);GO:0001669(acrosomal vesicle);GO:0005096(GTPase activator activity);GO:0005515(protein binding);GO:0005547(phosphatidylinositol-3,4,5-trisphosphate binding);GO:0005634(nucleus);GO:0005654(nucleoplasm);GO:0005737(cytoplasm);GO:0005819(spindle);GO:0005829(cytosol);GO:0005856(cytoskeleton);GO:0005874(microtubule);GO:000…	NA	NA	NA	NA	Rac GTPase activating protein 1 [Source:HGNC Symbol;Acc:HGNC:9804]	protein_coding;retained_intron	DOID:14566(disease_of_cellular_proliferation);DOID:162(cancer);DOID:4(disease)	R-HSA-2213248(Transport of antigen loaded MHC II molecules to surface);R-HSA-6811423(Retrograde vesicle is tethered at the ER by the NRZ complex and t-SNAREs);R-HSA-6811426(Retrograde COPI vesicles bind kinesin and microtubules);R-HSA-8981637(RHOA GAPs stimulate RHOA GTPase activity);R-HSA-9013022(RHOB GAPs stimulate RHOB GTPase activity);R-HSA-9013111(RHOC GAPs stimulate RHOC GTPase activity);R-…	24.7768	7.03278	3.52305	1.81682	3.92417e-18	1.63738e-16	up	yes
ENSG00000071575	TRIB2	28951	ENST00000155926;ENST00000405331;ENST00000483034	GO:0004672(protein kinase activity);GO:0004860(protein kinase inhibitor activity);GO:0005515(protein binding);GO:0005524(ATP binding);GO:0005634(nucleus);GO:0005737(cytoplasm);GO:0005856(cytoskeleton);GO:0006468(protein phosphorylation);GO:0006469(negative regulation of protein kinase activity);GO:0031434(mitogen-activated protein kinase kinase binding);GO:0031625(ubiquitin protein ligase binding…	NA	NA	NA	NA	tribbles pseudokinase 2 [Source:HGNC Symbol;Acc:HGNC:30809]	protein_coding;processed_transcript	DOID:0050155(sensory_system_disease);DOID:0050687(cell_type_cancer);DOID:13141(uveitis);DOID:14566(disease_of_cellular_proliferation);DOID:1492(eye_and_adnexa_disease);DOID:162(cancer);DOID:1909(melanoma);DOID:3480(uveal_disease);DOID:4(disease);DOID:5614(eye_disease);DOID:7(disease_of_anatomical_entity);DOID:863(nervous_system_disease)	NA	2.30999	0.548837	4.20889	2.07344	3.96042e-18	1.64712e-16	up	yes
ENSG00000175471	MCTP1	79772	ENST00000515393;ENST00000429576;ENST00000312216;ENST00000513857;ENST00000508509;ENST00000506568;ENST00000507214;ENST00000514040;ENST00000514780;ENST00000505208;ENST00000509850	GO:0005509(calcium ion binding);GO:0005768(endosome);GO:0005783(endoplasmic reticulum);GO:0005789(endoplasmic reticulum membrane);GO:0016020(membrane);GO:0016021(integral component of membrane);GO:0019722(calcium-mediated signaling);GO:0030054(cell junction);GO:0030336(negative regulation of cell migration);GO:0030672(synaptic vesicle membrane);GO:0031410(cytoplasmic vesicle);GO:0045202(synapse);…	NA	NA	NA	NA	multiple C2 and transmembrane domain containing 1 [Source:HGNC Symbol;Acc:HGNC:26183]	protein_coding;processed_transcript;retained_intron	NA	NA	0.968419	3.70545	0.26135	-1.93594	4.11289e-18	1.70498e-16	down	yes
ENSG00000121152	NCAPH	23397	ENST00000435975;ENST00000240423;ENST00000455200;ENST00000435349;ENST00000477409;ENST00000427946	GO:0000794(condensed nuclear chromosome);GO:0000796(condensin complex);GO:0003682(chromatin binding);GO:0005515(protein binding);GO:0005634(nucleus);GO:0005654(nucleoplasm);GO:0005694(chromosome);GO:0005737(cytoplasm);GO:0005829(cytosol);GO:0007049(cell cycle);GO:0007076(mitotic chromosome condensation);GO:0007143(female meiotic nuclear division);GO:0010032(meiotic chromosome condensation);GO:001…	NA	NA	NA	NA	non-SMC condensin I complex subunit H [Source:HGNC Symbol;Acc:HGNC:1112]	protein_coding;retained_intron	NA	R-HSA-2514854(CDK1 phosphorylates condensin I);R-HSA-2520883(Phosphorylated condensin I promotes condensation of prometaphase chromosomes);R-HSA-2529015(Dephosphorylation of CK2-modified condensin I);R-HSA-2529020(CK2 phosphorylates condensin I subunits)	14.6231	4.14908	3.52442	1.81739	4.19409e-18	1.73301e-16	up	yes
ENSG00000184992	BRI3BP	140707	ENST00000671775;ENST00000341446;ENST00000672415	GO:0005515(protein binding);GO:0005739(mitochondrion);GO:0005741(mitochondrial outer membrane);GO:0016020(membrane);GO:0016021(integral component of membrane);GO:0016021(integral component of membrane)	NA	NA	NA	NA	BRI3 binding protein [Source:HGNC Symbol;Acc:HGNC:14251]	protein_coding	NA	NA	5.58491	1.52724	3.65687	1.87061	4.23365e-18	1.74372e-16	up	yes
ENSG00000102384	CENPI	2491	ENST00000682095;ENST00000684367;ENST00000423383;ENST00000435570;ENST00000682304;ENST00000403304;ENST00000372927	GO:0000775(chromosome, centromeric region);GO:0000776(kinetochore);GO:0005515(protein binding);GO:0005634(nucleus);GO:0005654(nucleoplasm);GO:0005694(chromosome);GO:0005829(cytosol);GO:0007548(sex differentiation);GO:0016604(nuclear body);GO:0034508(centromere complex assembly);GO:0034508(centromere complex assembly)	NA	NA	NA	NA	centromere protein I [Source:HGNC Symbol;Acc:HGNC:3968]	protein_coding	NA	R-HSA-141409(Mad1 binds kinetochore);R-HSA-141422(MAD2 converted to an inhibitory state via interaction with Mad1);R-HSA-141431(MAD2 associates with the Mad1 kinetochore complex);R-HSA-141439(Release of activated MAD2 from kinetochores);R-HSA-1638803(Phosphorylation of cohesin by PLK1 at centromeres);R-HSA-1638821(PP2A-B56 dephosphorylates centromeric cohesin);R-HSA-2467809(ESPL1 (Separase) cleav…	3.30477	0.871703	3.79116	1.92264	4.4019e-18	1.80718e-16	up	yes
ENSG00000141446	ESCO1	114799	ENST00000383276;ENST00000269214;ENST00000622333;ENST00000580101	GO:0000785(chromatin);GO:0005634(nucleus);GO:0005654(nucleoplasm);GO:0005694(chromosome);GO:0006275(regulation of DNA replication);GO:0007049(cell cycle);GO:0007062(sister chromatid cohesion);GO:0008080(N-acetyltransferase activity);GO:0008270(zinc ion binding);GO:0016407(acetyltransferase activity);GO:0016740(transferase activity);GO:0016746(acyltransferase activity);GO:0018394(peptidyl-lysine a…	NA	NA	NA	NA	establishment of sister chromatid cohesion N-acetyltransferase 1 [Source:HGNC Symbol;Acc:HGNC:24645]	nonsense_mediated_decay;protein_coding;processed_transcript	NA	R-HSA-2468039(Acetylation of SMC3 subunit of chromosomal arm associated cohesin by ESCO1 or ESCO2);R-HSA-2473152(Acetylation of SMC3 subunit of centromeric chromatin associated cohesin by ESCO1 or ESCO2)	0.530469	2.31414	0.229229	-2.12514	4.67914e-18	1.91485e-16	down	yes
ENSG00000141682	PMAIP1	5366	ENST00000316660;ENST00000269518;ENST00000590596	GO:0001836(release of cytochrome c from mitochondria);GO:0005515(protein binding);GO:0005634(nucleus);GO:0005739(mitochondrion);GO:0005741(mitochondrial outer membrane);GO:0005829(cytosol);GO:0006915(apoptotic process);GO:0006919(activation of cysteine-type endopeptidase activity involved in apoptotic process);GO:0006974(cellular response to DNA damage stimulus);GO:0010498(proteasomal protein cat…	01524(Platinum drug resistance);04115(p53 signaling pathway);04210(Apoptosis);04215(Apoptosis - multiple species);05200(Pathways in cancer);05203(Viral carcinogenesis);05210(Colorectal cancer);05210(Colorectal cancer)	NA	NA	NA	phorbol-12-myristate-13-acetate-induced protein 1 [Source:HGNC Symbol;Acc:HGNC:9108]	protein_coding;retained_intron	DOID:0050117(disease_by_infectious_agent);DOID:0050686(organ_system_cancer);DOID:0050687(cell_type_cancer);DOID:0060056(hypersensitivity_reaction_disease);DOID:0060083(immune_system_cancer);DOID:0070004(myeloma);DOID:1036(chronic_leukemia);DOID:1037(lymphoblastic_leukemia);DOID:1040(chronic_lymphocytic_leukemia);DOID:1192(peripheral_nervous_system_neoplasm);DOID:1240(leukemia);DOID:14566(disease_…	R-HSA-140214(TP53 stimulates PMAIP1 (NOXA) expression);R-HSA-140216(Translocation of PMAIP1 (NOXA) to mitochondria);R-HSA-140217(Transactivation of PMAIP1 (NOXA) by E2F1);R-HSA-508162(BH3 only proteins associate with and inactivate anti-apoptotic BCL-XL);R-HSA-508163(BH3-only proteins associate with and inactivate anti-apoptotic BCL-2)	14.0679	51.8258	0.271445	-1.88127	5.31016e-18	2.16614e-16	down	yes
ENSG00000108840	HDAC5	10014	ENST00000225983;ENST00000682912;ENST00000336057;ENST00000591714;ENST00000586339;ENST00000586802;ENST00000588703;ENST00000593013;ENST00000592385;ENST00000587135;ENST00000588419;ENST00000587776	GO:0000118(histone deacetylase complex);GO:0000122(negative regulation of transcription by RNA polymerase II);GO:0000976(transcription cis-regulatory region binding);GO:0000978(RNA polymerase II cis-regulatory region sequence-specific DNA binding);GO:0001222(transcription corepressor binding);GO:0004407(histone deacetylase activity);GO:0005080(protein kinase C binding);GO:0005515(protein binding)…	04371(Apelin signaling pathway);05034(Alcoholism);05203(Viral carcinogenesis);05206(MicroRNAs in cancer);05206(MicroRNAs in cancer)	K11406	EC:3.5.1.98	NA	histone deacetylase 5 [Source:HGNC Symbol;Acc:HGNC:14068]	protein_coding;retained_intron	DOID:0050828(artery_disease);DOID:114(heart_disease);DOID:1287(cardiovascular_system_disease);DOID:14566(disease_of_cellular_proliferation);DOID:162(cancer);DOID:178(vascular_disease);DOID:1936(atherosclerosis);DOID:2348(arteriosclerotic_cardiovascular_disease);DOID:2349(arteriosclerosis);DOID:4(disease);DOID:6000(congestive_heart_failure);DOID:7(disease_of_anatomical_entity)	R-HSA-1912388(NICD1 displaces co-repressor complex from RBPJ (CSL));R-HSA-2220982(NICD1 PEST domain mutants displace co-repressor complex from RBPJ (CSL));R-HSA-350058(Formation of CSL NCOR corepressor complex);R-HSA-6807077(NR2E1 associated with transcription repressors binds PTEN promoter);R-HSA-8944104(PTEN gene transcription is stimulated by TP53, EGR1, PPARG, ATF2, MAF1, and inhibited by NR2…	4.56129	16.7905	0.271659	-1.88013	5.45691e-18	2.21891e-16	down	yes
ENSG00000104356	POP1	10940,11149,260434	ENST00000401707;ENST00000349693;ENST00000517435	GO:0000172(ribonuclease MRP complex);GO:0001682(tRNA 5'-leader removal);GO:0003723(RNA binding);GO:0004526(ribonuclease P activity);GO:0005515(protein binding);GO:0005615(extracellular space);GO:0005634(nucleus);GO:0005654(nucleoplasm);GO:0005655(nucleolar ribonuclease P complex);GO:0005730(nucleolus);GO:0008033(tRNA processing);GO:0016078(tRNA catabolic process);GO:0030681(multimeric ribonucleas…	03008(Ribosome biogenesis in eukaryotes);03013(RNA transport);03013(RNA transport)	K01164	EC:3.1.26.5	NA	POP1 homolog, ribonuclease P/MRP subunit [Source:HGNC Symbol;Acc:HGNC:30129]	protein_coding;retained_intron	DOID:0050686(organ_system_cancer);DOID:14566(disease_of_cellular_proliferation);DOID:162(cancer);DOID:170(endocrine_gland_cancer);DOID:1781(thyroid_cancer);DOID:3963(thyroid_carcinoma);DOID:3969(papillary_thyroid_carcinoma);DOID:4(disease)	R-HSA-5696810(RNase P cleaves the 5' end of pre-tRNA)	7.41447	2.03763	3.63877	1.86345	5.74792e-18	2.32982e-16	up	yes
ENSG00000116514	RNF19B	127544	ENST00000373456;ENST00000356990;ENST00000235150	GO:0000151(ubiquitin ligase complex);GO:0000209(protein polyubiquitination);GO:0002250(adaptive immune response);GO:0002376(immune system process);GO:0004842(ubiquitin-protein transferase activity);GO:0005515(protein binding);GO:0005737(cytoplasm);GO:0005783(endoplasmic reticulum);GO:0005789(endoplasmic reticulum membrane);GO:0005829(cytosol);GO:0006511(ubiquitin-dependent protein catabolic proce…	NA	K11973	EC:2.3.2.31	NA	ring finger protein 19B [Source:HGNC Symbol;Acc:HGNC:26886]	protein_coding	NA	R-HSA-983140(Transfer of Ub from E2 to substrate and release of E2);R-HSA-983147(Release of E3 from polyubiquitinated substrate);R-HSA-983156(Polyubiquitination of substrate);R-HSA-983157(Interaction of E3 with substrate and E2-Ub complex)	16.6474	60.8552	0.273557	-1.87008	6.21643e-18	2.51175e-16	down	yes
ENSG00000099875	MKNK2	2872	ENST00000309340;ENST00000587416;ENST00000588014;ENST00000589534;ENST00000250896;ENST00000586828;ENST00000591142;ENST00000585667;ENST00000586620;ENST00000591588	GO:0000166(nucleotide binding);GO:0004672(protein kinase activity);GO:0004674(protein serine/threonine kinase activity);GO:0004683(calmodulin-dependent protein kinase activity);GO:0004712(protein serine/threonine/tyrosine kinase activity);GO:0005515(protein binding);GO:0005516(calmodulin binding);GO:0005524(ATP binding);GO:0005634(nucleus);GO:0005654(nucleoplasm);GO:0005737(cytoplasm);GO:0006417(…	04010(MAPK signaling pathway);04066(HIF-1 signaling pathway);04910(Insulin signaling pathway);04910(Insulin signaling pathway)	K04372	EC:2.7.11.1	NA	MAPK interacting serine/threonine kinase 2 [Source:HGNC Symbol;Acc:HGNC:7111]	protein_coding;retained_intron;nonsense_mediated_decay	NA	NA	25.4892	92.4917	0.275583	-1.85944	6.43159e-18	2.59049e-16	down	yes
ENSG00000023697	DERA	51071	ENST00000428559;ENST00000532964;ENST00000526521;ENST00000530274;ENST00000528821	GO:0003824(catalytic activity);GO:0004139(deoxyribose-phosphate aldolase activity);GO:0005515(protein binding);GO:0005576(extracellular region);GO:0005634(nucleus);GO:0005654(nucleoplasm);GO:0005737(cytoplasm);GO:0005829(cytosol);GO:0006098(pentose-phosphate shunt);GO:0009264(deoxyribonucleotide catabolic process);GO:0016052(carbohydrate catabolic process);GO:0016829(lyase activity);GO:0034774(se…	00030(Pentose phosphate pathway);01100(Metabolic pathways);01100(Metabolic pathways)	K01619	EC:4.1.2.4	NA	deoxyribose-phosphate aldolase [Source:HGNC Symbol;Acc:HGNC:24269]	protein_coding;nonsense_mediated_decay;retained_intron	NA	R-HSA-6787321(DERA cleaves dR5P to GA3P and CH3CHO);R-HSA-6798748(Exocytosis of secretory granule lumen proteins);R-HSA-6800434(Exocytosis of ficolin-rich granule lumen proteins)	7.37846	1.94967	3.78447	1.92009	6.6744e-18	2.67984e-16	up	yes
ENSG00000077152	UBE2T	29089	ENST00000646651;ENST00000643045;ENST00000487227;ENST00000699426;ENST00000699429;ENST00000699423;ENST00000699428	GO:0000166(nucleotide binding);GO:0000209(protein polyubiquitination);GO:0003682(chromatin binding);GO:0004842(ubiquitin-protein transferase activity);GO:0005515(protein binding);GO:0005524(ATP binding);GO:0005634(nucleus);GO:0005654(nucleoplasm);GO:0005730(nucleolus);GO:0006281(DNA repair);GO:0006513(protein monoubiquitination);GO:0006974(cellular response to DNA damage stimulus);GO:0016567(prot…	03460(Fanconi anemia pathway);03460(Fanconi anemia pathway)	K13960	EC:2.3.2.23	NA	ubiquitin conjugating enzyme E2 T [Source:HGNC Symbol;Acc:HGNC:25009]	protein_coding;nonsense_mediated_decay;retained_intron	NA	R-HSA-6785342(FANCD2:FANCI complex and UBE2T bind ICL-DNA associated with the FA core complex);R-HSA-6785361(Monoubiquitination of FANCD2:FANCI);R-HSA-6788385(The complex of ATR and ATRIP is recruited to ICL-DNA);R-HSA-6788392(ATR phosphorylates RPA2, FANCI, FANCD2 and FANCM at ICL-DNA);R-HSA-8852130(UBA1 conjugates ubiquitin to nuclear E2 enzymes)	34.9074	9.91348	3.52121	1.81607	6.7751e-18	2.71174e-16	up	yes
ENSG00000013810	TACC3	10460	ENST00000484651;ENST00000651817;ENST00000313288;ENST00000650779;ENST00000404054;ENST00000493975;ENST00000484264;ENST00000466077;ENST00000470808;ENST00000652002;ENST00000651251;ENST00000652770;ENST00000612220	GO:0000226(microtubule cytoskeleton organization);GO:0000922(spindle pole);GO:0005515(protein binding);GO:0005737(cytoplasm);GO:0005815(microtubule organizing center);GO:0005819(spindle);GO:0005829(cytosol);GO:0005856(cytoskeleton);GO:0007049(cell cycle);GO:0007052(mitotic spindle organization);GO:0007091(metaphase/anaphase transition of mitotic cell cycle);GO:0008283(cell population proliferatio…	03013(RNA transport);03013(RNA transport)	NA	NA	NA	transforming acidic coiled-coil containing protein 3 [Source:HGNC Symbol;Acc:HGNC:11524]	retained_intron;nonsense_mediated_decay;protein_coding;processed_transcript	NA	R-HSA-9017855(NICD3 binds to TACC3);R-HSA-9604675(NICD4 binds to TACC3)	34.8107	10.0854	3.4516	1.78727	6.90906e-18	2.75671e-16	up	yes
ENSG00000131351	HAUS8	93323	ENST00000253669;ENST00000448593;ENST00000593360;ENST00000601564;ENST00000595958;ENST00000597479;ENST00000597917	GO:0000922(spindle pole);GO:0003674(molecular_function);GO:0005515(protein binding);GO:0005737(cytoplasm);GO:0005813(centrosome);GO:0005815(microtubule organizing center);GO:0005819(spindle);GO:0005829(cytosol);GO:0005856(cytoskeleton);GO:0005874(microtubule);GO:0005880(nuclear microtubule);GO:0007049(cell cycle);GO:0007098(centrosome cycle);GO:0008017(microtubule binding);GO:0051225(spindle asse…	NA	NA	NA	NA	HAUS augmin like complex subunit 8 [Source:HGNC Symbol;Acc:HGNC:30532]	protein_coding;nonsense_mediated_decay;retained_intron	NA	R-HSA-2574840(AJUBA facilitates AURKA autophosphorylation);R-HSA-2574845(AJUBA binds centrosome-associated AURKA);R-HSA-3000310(AURKA phosphorylates PLK1);R-HSA-3000319(BORA binds PLK1 and AURKA);R-HSA-380272(Plk1-mediated phosphorylation of Nlp);R-HSA-380283(Recruitment of additional gamma tubulin/ gamma TuRC to the centrosome);R-HSA-380294(Loss of C-Nap-1 from centrosomes);R-HSA-380303(Dissocia…	5.65696	1.53775	3.67873	1.87921	7.06894e-18	2.81172e-16	up	yes
ENSG00000184371	CSF1	1435	ENST00000329608;ENST00000526001;ENST00000357302;ENST00000420111;ENST00000369802;ENST00000488198	GO:0001503(ossification);GO:0001780(neutrophil homeostasis);GO:0001954(positive regulation of cell-matrix adhesion);GO:0002158(osteoclast proliferation);GO:0002376(immune system process);GO:0002687(positive regulation of leukocyte migration);GO:0002931(response to ischemia);GO:0003006(developmental process involved in reproduction);GO:0005125(cytokine activity);GO:0005157(macrophage colony-stimul…	04010(MAPK signaling pathway);04014(Ras signaling pathway);04015(Rap1 signaling pathway);04060(Cytokine-cytokine receptor interaction);04061(Viral protein interaction with cytokine and cytokine receptor);04151(PI3K-Akt signaling pathway);04380(Osteoclast differentiation);04640(Hematopoietic cell lineage);04668(TNF signaling pathway);05010(Alzheimer disease);05022(Pathways of neurodegeneration - m…	NA	NA	NA	colony stimulating factor 1 [Source:HGNC Symbol;Acc:HGNC:2432]	protein_coding;processed_transcript	DOID:0050117(disease_by_infectious_agent);DOID:0050161(lower_respiratory_tract_disease);DOID:0050686(organ_system_cancer);DOID:0050687(cell_type_cancer);DOID:0050828(artery_disease);DOID:0060100(musculoskeletal_system_cancer);DOID:0080001(bone_disease);DOID:0080005(bone_remodeling_disease);DOID:10591(pre_eclampsia);DOID:10652(Alzheimer's_disease);DOID:10763(hypertension);DOID:1091(tooth_disease);…	R-HSA-8937656(IL10 negatively regulates plasma membrane-associated inflammatory mediators);R-HSA-8952289(FAM20C phosphorylates FAM20C substrates);R-HSA-9009485(IL34:CSF1 binds CSF1R);R-HSA-9009488(IL34 binds CSF1)	5.36837	19.6946	0.272582	-1.87524	7.35539e-18	2.91657e-16	down	yes
ENSG00000175305	CCNE2	9134	ENST00000520509;ENST00000524224;ENST00000517487;ENST00000521809	GO:0000079(regulation of cyclin-dependent protein serine/threonine kinase activity);GO:0000082(G1/S transition of mitotic cell cycle);GO:0000307(cyclin-dependent protein kinase holoenzyme complex);GO:0000723(telomere maintenance);GO:0005515(protein binding);GO:0005634(nucleus);GO:0005654(nucleoplasm);GO:0005737(cytoplasm);GO:0005813(centrosome);GO:0005829(cytosol);GO:0006270(DNA replication initi…	04110(Cell cycle);04114(Oocyte meiosis);04115(p53 signaling pathway);04151(PI3K-Akt signaling pathway);04218(Cellular senescence);04934(Cushing syndrome);05161(Hepatitis B);05162(Measles);05165(Human papillomavirus infection);05166(Human T-cell leukemia virus 1 infection);05169(Epstein-Barr virus infection);05200(Pathways in cancer);05203(Viral carcinogenesis);05206(MicroRNAs in cancer);05215(Pro…	NA	NA	NA	cyclin E2 [Source:HGNC Symbol;Acc:HGNC:1590]	protein_coding;retained_intron;nonsense_mediated_decay	DOID:0050155(sensory_system_disease);DOID:0050686(organ_system_cancer);DOID:0060116(sensory_system_cancer);DOID:14566(disease_of_cellular_proliferation);DOID:1492(eye_and_adnexa_disease);DOID:162(cancer);DOID:2174(ocular_cancer);DOID:3093(nervous_system_cancer);DOID:4645(retinal_cancer);DOID:4(disease);DOID:5614(eye_disease);DOID:5679(retinal_disease);DOID:768(retinoblastoma);DOID:771(retinal_cel…	R-HSA-1363303(p130 (RBL2) in complex with E2F4/5:DP1/2 binds to cyclin E/A:CDK2);R-HSA-1363306(p130 (RBL2) binds Cyclin E/A:CDK2);R-HSA-1363311(p107 (RBL1) in complex with E2F4:DP1/2 binds to cyclin E/A:CDK2);R-HSA-1363314(p107 (RBL1) binds CyclinE/A:CDK2);R-HSA-157906(Translocation of Cyclin E:Cdk2 complex to the nucleus);R-HSA-187520(Cyclin E/A:Cdk2-mediated phosphorylation of p27/p21);R-HSA-18…	1.20178	0.233788	5.14048	2.3619	7.48289e-18	2.95794e-16	up	yes
ENSG00000184661	CDCA2	157313	ENST00000330560;ENST00000380665	GO:0005634(nucleus);GO:0005654(nucleoplasm);GO:0005694(chromosome);GO:0005829(cytosol);GO:0007049(cell cycle);GO:0007059(chromosome segregation);GO:0007088(regulation of mitotic nuclear division);GO:0035307(positive regulation of protein dephosphorylation);GO:0051301(cell division);GO:0051983(regulation of chromosome segregation);GO:0051983(regulation of chromosome segregation)	NA	NA	NA	NA	cell division cycle associated 2 [Source:HGNC Symbol;Acc:HGNC:14623]	protein_coding	NA	NA	3.95458	1.00317	3.94207	1.97895	7.61806e-18	3.00208e-16	up	yes
ENSG00000160298	C21orf58	54058	ENST00000291691;ENST00000475776;ENST00000397683;ENST00000472607;ENST00000491666;ENST00000397682;ENST00000445935;ENST00000397679	NA	NA	NA	NA	NA	chromosome 21 open reading frame 58 [Source:HGNC Symbol;Acc:HGNC:1300]	protein_coding;retained_intron;processed_transcript;nonsense_mediated_decay	NA	NA	2.1368	0.523334	4.08305	2.02965	8.526e-18	3.34954e-16	up	yes
ENSG00000125740	FOSB	2354	ENST00000353609;ENST00000586615;ENST00000592811;ENST00000587358;ENST00000590335;ENST00000586113;ENST00000592436	GO:0000122(negative regulation of transcription by RNA polymerase II);GO:0000785(chromatin);GO:0000978(RNA polymerase II cis-regulatory region sequence-specific DNA binding);GO:0000981(DNA-binding transcription factor activity, RNA polymerase II-specific);GO:0001228(DNA-binding transcription activator activity, RNA polymerase II-specific);GO:0003677(DNA binding);GO:0003690(double-stranded DNA bin…	04380(Osteoclast differentiation);04657(IL-17 signaling pathway);05030(Cocaine addiction);05031(Amphetamine addiction);05034(Alcoholism);05034(Alcoholism)	NA	NA	TF_bZIP	FosB proto-oncogene, AP-1 transcription factor subunit [Source:HGNC Symbol;Acc:HGNC:3797]	protein_coding;retained_intron	DOID:0050686(organ_system_cancer);DOID:14566(disease_of_cellular_proliferation);DOID:162(cancer);DOID:3119(gastrointestinal_system_cancer);DOID:3571(liver_cancer);DOID:4(disease);DOID:684(hepatocellular_carcinoma);DOID:686(liver_carcinoma)	R-HSA-9011975(Estrogen-responsive MYC gene expression);R-HSA-9011997(ESR1:ESTG, JUND:FOSB and Cohesin Complex bind distal enhancer elements in MYC gene promoter);R-HSA-9031575(AP-1 binds ARC gene);R-HSA-9031624(ARC gene expression)	0.585008	2.45877	0.237927	-2.07141	8.70972e-18	3.41122e-16	down	yes
ENSG00000094804	CDC6	990	ENST00000209728;ENST00000582402;ENST00000580824;ENST00000473555;ENST00000648633	GO:0000076(DNA replication checkpoint signaling);GO:0000079(regulation of cyclin-dependent protein serine/threonine kinase activity);GO:0000166(nucleotide binding);GO:0000278(mitotic cell cycle);GO:0000922(spindle pole);GO:0003688(DNA replication origin binding);GO:0005515(protein binding);GO:0005524(ATP binding);GO:0005634(nucleus);GO:0005654(nucleoplasm);GO:0005737(cytoplasm);GO:0005829(cytosol…	04110(Cell cycle);04110(Cell cycle)	NA	NA	NA	cell division cycle 6 [Source:HGNC Symbol;Acc:HGNC:1744]	protein_coding;retained_intron	DOID:0050161(lower_respiratory_tract_disease);DOID:0050686(organ_system_cancer);DOID:14566(disease_of_cellular_proliferation);DOID:1579(respiratory_system_disease);DOID:162(cancer);DOID:2320(obstructive_lung_disease);DOID:3083(chronic_obstructive_pulmonary_disease);DOID:3119(gastrointestinal_system_cancer);DOID:3571(liver_cancer);DOID:4(disease);DOID:684(hepatocellular_carcinoma);DOID:686(liver_c…	R-HSA-176298(Activation of claspin);R-HSA-176318(Loading of claspin onto DNA during replication origin firing);R-HSA-68688(CDC6 association with ORC(1-6) at replication origins);R-HSA-68914(DNA polymerase alpha:primase binds at the origin);R-HSA-68916(DNA Replication Factor A (RPA) associates with the pre-replicative complex at the origin);R-HSA-68917(Cdc45 associates with the pre-replicative com…	19.6109	5.65366	3.46871	1.7944	8.84828e-18	3.45489e-16	up	yes
ENSG00000132646	PCNA	5111	ENST00000379160;ENST00000379143	GO:0000122(negative regulation of transcription by RNA polymerase II);GO:0000307(cyclin-dependent protein kinase holoenzyme complex);GO:0000701(purine-specific mismatch base pair DNA N-glycosylase activity);GO:0000781(chromosome, telomeric region);GO:0000785(chromatin);GO:0001673(male germ cell nucleus);GO:0003677(DNA binding);GO:0003682(chromatin binding);GO:0003684(damaged DNA binding);GO:00055…	03030(DNA replication);03410(Base excision repair);03420(Nucleotide excision repair);03430(Mismatch repair);04110(Cell cycle);04530(Tight junction);05161(Hepatitis B);05161(Hepatitis B)	NA	NA	NA	proliferating cell nuclear antigen [Source:HGNC Symbol;Acc:HGNC:8729]	protein_coding	DOID:0050117(disease_by_infectious_agent);DOID:0050155(sensory_system_disease);DOID:0050161(lower_respiratory_tract_disease);DOID:0050177(monogenic_disease);DOID:0050615(respiratory_system_cancer);DOID:0050622(reproductive_organ_benign_neoplasm);DOID:0050686(organ_system_cancer);DOID:0050687(cell_type_cancer);DOID:0050736(autosomal_dominant_disease);DOID:0050739(autosomal_genetic_disease);DOID:00…	R-HSA-110307(REV1 binds AP-dsDNA);R-HSA-110308(REV1 inserts dCMP opposite to AP sites in DNA);R-HSA-110311(POLZ extends translesion synthesis);R-HSA-110316(POLH binds monoUb:K164-PCNA at damaged TT-CPD-DNA template);R-HSA-110317(Insertion of correct bases opposite the lesion by POLH);R-HSA-110319(Elongation by POLH);R-HSA-110363(FEN1 bound to PCNA and APEX1 cleaves flap ssDNA);R-HSA-110364(PCNA:P…	132.951	38.5821	3.44593	1.78489	8.8811e-18	3.45713e-16	up	yes
ENSG00000072858	SIDT1	54847	ENST00000264852;ENST00000480746;ENST00000481891;ENST00000465803;ENST00000498152;ENST00000491730;ENST00000483946	GO:0003723(RNA binding);GO:0003725(double-stranded RNA binding);GO:0005764(lysosome);GO:0005886(plasma membrane);GO:0015485(cholesterol binding);GO:0016020(membrane);GO:0016021(integral component of membrane);GO:0050658(RNA transport);GO:0051033(RNA transmembrane transporter activity);GO:0051033(RNA transmembrane transporter activity)	NA	NA	NA	NA	SID1 transmembrane family member 1 [Source:HGNC Symbol;Acc:HGNC:25967]	protein_coding;retained_intron	NA	NA	0.133017	0.723108	0.183952	-2.4426	8.97245e-18	3.47901e-16	down	yes
ENSG00000093009	CDC45	8318	ENST00000263201;ENST00000404724;ENST00000428937;ENST00000491520;ENST00000471470;ENST00000493724;ENST00000671972;ENST00000437685;ENST00000407835;ENST00000672837;ENST00000487669;ENST00000455750;ENST00000438587	GO:0000076(DNA replication checkpoint signaling);GO:0000727(double-strand break repair via break-induced replication);GO:0003682(chromatin binding);GO:0003688(DNA replication origin binding);GO:0003697(single-stranded DNA binding);GO:0005515(protein binding);GO:0005634(nucleus);GO:0005654(nucleoplasm);GO:0005737(cytoplasm);GO:0005813(centrosome);GO:0006260(DNA replication);GO:0006268(DNA unwindin…	04110(Cell cycle);04110(Cell cycle)	NA	NA	NA	cell division cycle 45 [Source:HGNC Symbol;Acc:HGNC:1739]	protein_coding;nonsense_mediated_decay;retained_intron	DOID:14566(disease_of_cellular_proliferation);DOID:162(cancer);DOID:4(disease)	R-HSA-176298(Activation of claspin);R-HSA-176318(Loading of claspin onto DNA during replication origin firing);R-HSA-176942(Multiple proteins are localized at replication fork);R-HSA-68914(DNA polymerase alpha:primase binds at the origin);R-HSA-68916(DNA Replication Factor A (RPA) associates with the pre-replicative complex at the origin);R-HSA-68917(Cdc45 associates with the pre-replicative comp…	26.5655	7.61275	3.48961	1.80307	8.99181e-18	3.47901e-16	up	yes
ENSG00000171631	P2RY6	5031	ENST00000393590;ENST00000544437;ENST00000393591;ENST00000680915;ENST00000679753;ENST00000540124	GO:0001621(G protein-coupled ADP receptor activity);GO:0004930(G protein-coupled receptor activity);GO:0005515(protein binding);GO:0005886(plasma membrane);GO:0005887(integral component of plasma membrane);GO:0006909(phagocytosis);GO:0007165(signal transduction);GO:0007186(G protein-coupled receptor signaling pathway);GO:0007200(phospholipase C-activating G protein-coupled receptor signaling path…	04080(Neuroactive ligand-receptor interaction);04080(Neuroactive ligand-receptor interaction)	NA	NA	NA	pyrimidinergic receptor P2Y6 [Source:HGNC Symbol;Acc:HGNC:8543]	protein_coding;processed_transcript	DOID:0050615(respiratory_system_cancer);DOID:0050686(organ_system_cancer);DOID:1192(peripheral_nervous_system_neoplasm);DOID:1324(lung_cancer);DOID:14566(disease_of_cellular_proliferation);DOID:162(cancer);DOID:2621(autonomic_nervous_system_neoplasm);DOID:3093(nervous_system_cancer);DOID:4(disease);DOID:769(neuroblastoma)	R-HSA-379048(Liganded Gq/11-activating GPCRs act as GEFs for Gq/11);R-HSA-417896(P2Y6 receptor can bind to UDP);R-HSA-749448(Liganded Gq-activating GPCRs bind inactive heterotrimeric Gq);R-HSA-749452(The Ligand:GPCR:Gq complex dissociates)	1.01318	0.245308	4.13025	2.04623	1.08087e-17	4.15721e-16	up	yes
ENSG00000282851	BISPR	105221694	ENST00000635435;ENST00000634731;ENST00000635536;ENST00000635572;ENST00000645376;ENST00000635176;ENST00000634291;ENST00000634577;ENST00000635339;ENST00000634568;ENST00000635060	NA	NA	NA	NA	NA	BST2 interferon stimulated positive regulator [Source:HGNC Symbol;Acc:HGNC:51290]	lncRNA	NA	NA	0.580583	2.78155	0.208727	-2.26031	1.08098e-17	4.15721e-16	down	yes
ENSG00000174808	BTC	685	ENST00000395743;ENST00000512743	GO:0005154(epidermal growth factor receptor binding);GO:0005515(protein binding);GO:0005576(extracellular region);GO:0005615(extracellular space);GO:0005886(plasma membrane);GO:0006915(apoptotic process);GO:0007165(signal transduction);GO:0007171(activation of transmembrane receptor protein tyrosine kinase activity);GO:0007173(epidermal growth factor receptor signaling pathway);GO:0008083(growth …	04012(ErbB signaling pathway);04012(ErbB signaling pathway)	NA	NA	NA	betacellulin [Source:HGNC Symbol;Acc:HGNC:1121]	protein_coding	DOID:0050686(organ_system_cancer);DOID:0060100(musculoskeletal_system_cancer);DOID:14566(disease_of_cellular_proliferation);DOID:162(cancer);DOID:201(connective_tissue_cancer);DOID:4231(histiocytoma);DOID:4415(fibrous_histiocytoma);DOID:4(disease)	R-HSA-1225978(Covalent tyrosine kinase inhibitors bind and inhibit wild-type EGF:EGFR dimers);R-HSA-1236398(ERBB4 binds NRGs or EGF-like ligands);R-HSA-1250195(SHC1 phosphorylation by ERBB2 heterodimers);R-HSA-1250220(Homodimerization of ERBB4);R-HSA-1250315(Trans-autophosphorylation of ERBB4 homodimers);R-HSA-1250346(Binding of PI3K to p-ERBB2:p-ERBB4 CYT-1 heterodimers);R-HSA-1250348(Phosphoryl…	0.878056	3.88437	0.226048	-2.1453	1.21624e-17	4.66333e-16	down	yes
ENSG00000127946	HIP1	3092	ENST00000336926;ENST00000479835;ENST00000485723;ENST00000404944	GO:0003779(actin binding);GO:0005154(epidermal growth factor receptor binding);GO:0005200(structural constituent of cytoskeleton);GO:0005515(protein binding);GO:0005543(phospholipid binding);GO:0005634(nucleus);GO:0005737(cytoplasm);GO:0005794(Golgi apparatus);GO:0005829(cytosol);GO:0005856(cytoskeleton);GO:0006897(endocytosis);GO:0006915(apoptotic process);GO:0006919(activation of cysteine-type …	05016(Huntington disease);05022(Pathways of neurodegeneration - multiple diseases);05022(Pathways of neurodegeneration - multiple diseases)	NA	NA	NA	huntingtin interacting protein 1 [Source:HGNC Symbol;Acc:HGNC:4913]	protein_coding;processed_transcript;retained_intron	DOID:14566(disease_of_cellular_proliferation);DOID:162(cancer);DOID:1826(epilepsy_syndrome);DOID:225(syndrome);DOID:331(central_nervous_system_disease);DOID:4(disease);DOID:7(disease_of_anatomical_entity);DOID:863(nervous_system_disease);DOID:936(brain_disease)	R-HSA-8868230(SNX9 recruits components of the actin polymerizing machinery);R-HSA-8868236(BAR domain proteins recruit dynamin);R-HSA-8868648(SYNJ hydrolyze PI(4,5)P2 to PI(4)P);R-HSA-8868651(Endophilins recruit synaptojanins to the clathrin-coated pit);R-HSA-8868658(HSPA8-mediated ATP hydrolysis promotes vesicle uncoating);R-HSA-8868659(Clathrin recruits auxilins to the clathrin-coated vesicle);R…	1.69035	0.439566	3.84551	1.94317	1.46124e-17	5.58596e-16	up	yes
ENSG00000180739	S1PR5	53637	ENST00000333430;ENST00000590601;ENST00000439028	GO:0003376(sphingosine-1-phosphate receptor signaling pathway);GO:0004930(G protein-coupled receptor activity);GO:0005515(protein binding);GO:0005737(cytoplasm);GO:0005886(plasma membrane);GO:0007165(signal transduction);GO:0007186(G protein-coupled receptor signaling pathway);GO:0007189(adenylate cyclase-activating G protein-coupled receptor signaling pathway);GO:0016020(membrane);GO:0016021(int…	04071(Sphingolipid signaling pathway);04080(Neuroactive ligand-receptor interaction);04080(Neuroactive ligand-receptor interaction)	NA	NA	NA	sphingosine-1-phosphate receptor 5 [Source:HGNC Symbol;Acc:HGNC:14299]	protein_coding	DOID:0050686(organ_system_cancer);DOID:0060083(immune_system_cancer);DOID:1240(leukemia);DOID:14566(disease_of_cellular_proliferation);DOID:162(cancer);DOID:2531(hematologic_cancer);DOID:4(disease)	R-HSA-380073(Liganded Gi-activating GPCR acts as a GEF for Gi);R-HSA-419428(S1PR2-5 bind S1P);R-HSA-749454(The Ligand:GPCR:Gi complex dissociates);R-HSA-749456(Liganded Gi-activating GPCRs bind inactive heterotrimeric G-protein Gi)	2.71197	0.618557	4.38435	2.13236	1.51511e-17	5.77461e-16	up	yes
ENSG00000197063	MAFG	4097	ENST00000357736;ENST00000392366	GO:0000122(negative regulation of transcription by RNA polymerase II);GO:0000978(RNA polymerase II cis-regulatory region sequence-specific DNA binding);GO:0000981(DNA-binding transcription factor activity, RNA polymerase II-specific);GO:0001228(DNA-binding transcription activator activity, RNA polymerase II-specific);GO:0001701(in utero embryonic development);GO:0003677(DNA binding);GO:0003700(DN…	NA	NA	NA	TF_bZIP	MAF bZIP transcription factor G [Source:HGNC Symbol;Acc:HGNC:6781]	protein_coding	NA	R-HSA-1008200(NFE2 binds the beta globin locus control region);R-HSA-1008220(Expression of globin genes under control of the beta globin control region);R-HSA-1008240(NFE2 is a heterodimer);R-HSA-9759147(NFE2L2 and MAFG bind the SQSTM1 gene);R-HSA-9759157(NFE2L2-dependent SQSTM1 gene expression);R-HSA-9761812(AcK- NFE2L2, MAFG and CREBBP, EP300 bind the G6PD);R-HSA-9761828(NFE2L2 binds the PGD ge…	17.7577	63.5314	0.279511	-1.83903	1.52703e-17	5.79895e-16	down	yes
ENSG00000145390	USP53	54532	ENST00000692078;ENST00000450251;ENST00000514305;ENST00000510852;ENST00000274030;ENST00000688980;ENST00000514665	GO:0001508(action potential);GO:0004843(cysteine-type deubiquitinase activity);GO:0005515(protein binding);GO:0005575(cellular_component);GO:0005911(cell-cell junction);GO:0005923(bicellular tight junction);GO:0007605(sensory perception of sound);GO:0008150(biological_process);GO:0010996(response to auditory stimulus);GO:0016579(protein deubiquitination);GO:0030054(cell junction);GO:0051402(neuro…	NA	NA	NA	NA	ubiquitin specific peptidase 53 [Source:HGNC Symbol;Acc:HGNC:29255]	protein_coding;processed_transcript;retained_intron	NA	NA	0.335733	1.35878	0.247085	-2.01692	1.53058e-17	5.79895e-16	down	yes
ENSG00000100297	MCM5	4174	ENST00000216122;ENST00000493076;ENST00000382011;ENST00000451351;ENST00000417343;ENST00000416905	GO:0000166(nucleotide binding);GO:0000727(double-strand break repair via break-induced replication);GO:0000781(chromosome, telomeric region);GO:0003677(DNA binding);GO:0003678(DNA helicase activity);GO:0003688(DNA replication origin binding);GO:0003697(single-stranded DNA binding);GO:0004386(helicase activity);GO:0005515(protein binding);GO:0005524(ATP binding);GO:0005634(nucleus);GO:0005654(nucl…	03030(DNA replication);04110(Cell cycle);04110(Cell cycle)	K02209	EC:3.6.4.12	NA	minichromosome maintenance complex component 5 [Source:HGNC Symbol;Acc:HGNC:6948]	protein_coding;retained_intron;nonsense_mediated_decay;processed_transcript	DOID:0050686(organ_system_cancer);DOID:120(female_reproductive_organ_cancer);DOID:14566(disease_of_cellular_proliferation);DOID:162(cancer);DOID:16(integumentary_system_disease);DOID:193(reproductive_organ_cancer);DOID:2151(malignant_ovarian_surface_epithelial_stromal_neoplasm);DOID:2152(ovary_epithelial_cancer);DOID:2394(ovarian_cancer);DOID:3713(ovary_adenocarcinoma);DOID:37(skin_disease);DOID:…	R-HSA-169468(MCM2-7 mediated fork unwinding);R-HSA-176298(Activation of claspin);R-HSA-176318(Loading of claspin onto DNA during replication origin firing);R-HSA-176942(Multiple proteins are localized at replication fork);R-HSA-68914(DNA polymerase alpha:primase binds at the origin);R-HSA-68916(DNA Replication Factor A (RPA) associates with the pre-replicative complex at the origin);R-HSA-68917(C…	33.7759	9.92132	3.40438	1.76739	1.56197e-17	5.90035e-16	up	yes
ENSG00000167106	FAM102A	399665	ENST00000373095;ENST00000373084;ENST00000465821;ENST00000493175	GO:0005515(protein binding);GO:0005515(protein binding)	NA	NA	NA	NA	family with sequence similarity 102 member A [Source:HGNC Symbol;Acc:HGNC:31419]	protein_coding;retained_intron;processed_transcript	NA	NA	4.3249	15.6513	0.276329	-1.85554	1.61656e-17	6.08858e-16	down	yes
ENSG00000103044	HAS3	3038	ENST00000219322;ENST00000569188;ENST00000568321;ENST00000566118;ENST00000306560	GO:0005515(protein binding);GO:0005634(nucleus);GO:0005737(cytoplasm);GO:0005794(Golgi apparatus);GO:0005886(plasma membrane);GO:0005887(integral component of plasma membrane);GO:0005975(carbohydrate metabolic process);GO:0016020(membrane);GO:0016021(integral component of membrane);GO:0016740(transferase activity);GO:0016757(glycosyltransferase activity);GO:0030213(hyaluronan biosynthetic process…	NA	K00752	EC:2.4.1.212	NA	hyaluronan synthase 3 [Source:HGNC Symbol;Acc:HGNC:4820]	protein_coding;processed_transcript	NA	R-HSA-2160851(HAS1,2,3 mediate the polymerisation of HA)	138.987	41.0792	3.38339	1.75847	1.70475e-17	6.40183e-16	up	yes
ENSG00000151503	NCAPD3	23310	ENST00000688672;ENST00000534548;ENST00000534532;ENST00000688834;ENST00000685119;ENST00000688263;ENST00000686368;ENST00000532445;ENST00000534290;ENST00000526422;ENST00000692494;ENST00000693576;ENST00000690743;ENST00000687155;ENST00000687480;ENST00000528065	GO:0000779(condensed chromosome, centromeric region);GO:0000796(condensin complex);GO:0005515(protein binding);GO:0005634(nucleus);GO:0005654(nucleoplasm);GO:0005721(pericentric heterochromatin);GO:0007049(cell cycle);GO:0007076(mitotic chromosome condensation);GO:0010032(meiotic chromosome condensation);GO:0016020(membrane);GO:0030261(chromosome condensation);GO:0035064(methylated histone bindin…	NA	NA	NA	NA	non-SMC condensin II complex subunit D3 [Source:HGNC Symbol;Acc:HGNC:28952]	protein_coding;nonsense_mediated_decay;retained_intron	NA	R-HSA-2172666(RB1 binds condensin II);R-HSA-2288097(Condensin II complex binds H4K20me1-containing nucleosomes);R-HSA-2294574(Condensin II-mediated condensation of prophase chromosomes);R-HSA-2294580(PLK1 hyperphosphorylates Condensin II complex);R-HSA-2294590(PLK1 binds phosphorylated condensin II complex);R-HSA-2294600(CDK1 phosphorylates condensin II subunit NCAPD3);R-HSA-2429719(MCPH1 sequest…	5.72682	1.67138	3.42641	1.7767	1.96175e-17	7.34534e-16	up	yes
ENSG00000181218	H2AW	92815	ENST00000366695;ENST00000689584;ENST00000691624	GO:0000786(nucleosome);GO:0003677(DNA binding);GO:0005515(protein binding);GO:0005634(nucleus);GO:0005694(chromosome);GO:0006337(nucleosome disassembly);GO:0030527(structural constituent of chromatin);GO:0046982(protein heterodimerization activity);GO:0070062(extracellular exosome);GO:0070914(UV-damage excision repair);GO:0070914(UV-damage excision repair)	04217(Necroptosis);05034(Alcoholism);05322(Systemic lupus erythematosus);05322(Systemic lupus erythematosus)	NA	NA	NA	H2A.W histone [Source:HGNC Symbol;Acc:HGNC:20507]	protein_coding;nonsense_mediated_decay	NA	R-HSA-3321975(NuA4 complex acetylates histone H2A, HIST1H4);R-HSA-3662335(EP300 acetylates histone H2A, H2B, H3, H4);R-HSA-3769447(HDAC1:2-containing complex deacetylate histones);R-HSA-3777129(HDAC3 containing complexes deacetylate histone);R-HSA-3782637(HDAC8 deacetylates histones);R-HSA-3782655(HDAC10 deacetylates histone);R-HSA-5205820(PRMT6 methylates arginine-4 of histone H2A (H2AR3));R-HSA…	10.5397	38.2543	0.275516	-1.85979	1.97391e-17	7.36926e-16	down	yes
ENSG00000152409	JMY	133746	ENST00000396137	GO:0000421(autophagosome membrane);GO:0003713(transcription coactivator activity);GO:0003779(actin binding);GO:0005515(protein binding);GO:0005634(nucleus);GO:0005654(nucleoplasm);GO:0005737(cytoplasm);GO:0005856(cytoskeleton);GO:0006281(DNA repair);GO:0006357(regulation of transcription by RNA polymerase II);GO:0006974(cellular response to DNA damage stimulus);GO:0008017(microtubule binding);GO:…	NA	NA	NA	NA	junction mediating and regulatory protein, p53 cofactor [Source:HGNC Symbol;Acc:HGNC:28916]	protein_coding	NA	R-HSA-6804229(JMY, TTC5 and EP300 bind);R-HSA-6804242(TP53 binds the complex of JMY, EP300 and TTC5);R-HSA-6804253(MDM2 ubiquitinates JMY);R-HSA-6804379(PRMT5 binds TTC5);R-HSA-6804383(PRMT5 methylates TP53)	0.302553	1.28653	0.23517	-2.08822	2.01789e-17	7.51148e-16	down	yes
ENSG00000112312	GMNN	51053	ENST00000230056;ENST00000356509;ENST00000378059;ENST00000468943;ENST00000476555	GO:0003682(chromatin binding);GO:0003714(transcription corepressor activity);GO:0005515(protein binding);GO:0005634(nucleus);GO:0005654(nucleoplasm);GO:0005737(cytoplasm);GO:0005829(cytosol);GO:0006275(regulation of DNA replication);GO:0007049(cell cycle);GO:0007346(regulation of mitotic cell cycle);GO:0008156(negative regulation of DNA replication);GO:0009887(animal organ morphogenesis);GO:00170…	NA	NA	NA	NA	geminin DNA replication inhibitor [Source:HGNC Symbol;Acc:HGNC:17493]	protein_coding;retained_intron	DOID:14566(disease_of_cellular_proliferation);DOID:162(cancer);DOID:4(disease)	R-HSA-68712(The geminin component of geminin:Cdt1 complexes is ubiquitinated, releasing Cdt1);R-HSA-68825(Ubiquitinated geminin is degraded by the proteasome);R-HSA-69299(CDT1 binds geminin)	12.5108	3.48967	3.5851	1.84201	2.27867e-17	8.45756e-16	up	yes
ENSG00000031003	FAM13B	51306	ENST00000033079;ENST00000505281;ENST00000508403;ENST00000425075;ENST00000420893;ENST00000510804;ENST00000689681	GO:0005096(GTPase activator activity);GO:0005829(cytosol);GO:0007165(signal transduction);GO:0050790(regulation of catalytic activity);GO:0051056(regulation of small GTPase mediated signal transduction);GO:0051056(regulation of small GTPase mediated signal transduction)	NA	NA	NA	NA	family with sequence similarity 13 member B [Source:HGNC Symbol;Acc:HGNC:1335]	protein_coding;retained_intron	NA	R-HSA-9013144(RAC1 GAPs stimulate RAC1 GTPase activity);R-HSA-9013161(CDC42 GAPs stimulate CDC42 GTPase activity)	0.906164	3.49549	0.259238	-1.94765	2.39995e-17	8.8819e-16	down	yes
ENSG00000126787	DLGAP5	9787	ENST00000395425;ENST00000247191;ENST00000554007;ENST00000554067;ENST00000557645	GO:0005515(protein binding);GO:0005634(nucleus);GO:0005737(cytoplasm);GO:0005739(mitochondrion);GO:0005819(spindle);GO:0005829(cytosol);GO:0005856(cytoskeleton);GO:0007049(cell cycle);GO:0007052(mitotic spindle organization);GO:0007059(chromosome segregation);GO:0007079(mitotic chromosome movement towards spindle pole);GO:0007346(regulation of mitotic cell cycle);GO:0008017(microtubule binding);G…	NA	NA	NA	NA	DLG associated protein 5 [Source:HGNC Symbol;Acc:HGNC:16864]	protein_coding;retained_intron	DOID:0050686(organ_system_cancer);DOID:14566(disease_of_cellular_proliferation);DOID:162(cancer);DOID:3119(gastrointestinal_system_cancer);DOID:3571(liver_cancer);DOID:4(disease);DOID:684(hepatocellular_carcinoma);DOID:686(liver_carcinoma)	R-HSA-9018538(DLGAP5 gene transcription is stimulated by NOTCH3)	8.2699	2.30695	3.58478	1.84189	2.41816e-17	8.92344e-16	up	yes
ENSG00000130303	BST2	684	ENST00000252593;ENST00000533098;ENST00000527220	GO:0002376(immune system process);GO:0002737(negative regulation of plasmacytoid dendritic cell cytokine production);GO:0003723(RNA binding);GO:0005515(protein binding);GO:0005737(cytoplasm);GO:0005768(endosome);GO:0005770(late endosome);GO:0005771(multivesicular body);GO:0005794(Golgi apparatus);GO:0005886(plasma membrane);GO:0008191(metalloendopeptidase inhibitor activity);GO:0009615(response t…	05168(Herpes simplex virus 1 infection);05170(Human immunodeficiency virus 1 infection);05170(Human immunodeficiency virus 1 infection)	NA	NA	NA	bone marrow stromal cell antigen 2 [Source:HGNC Symbol;Acc:HGNC:1119]	protein_coding;retained_intron;nonsense_mediated_decay	DOID:0050117(disease_by_infectious_agent);DOID:0050686(organ_system_cancer);DOID:14566(disease_of_cellular_proliferation);DOID:162(cancer);DOID:263(kidney_cancer);DOID:2914(immune_system_disease);DOID:3996(urinary_system_cancer);DOID:4450(renal_cell_carcinoma);DOID:4451(renal_carcinoma);DOID:4(disease);DOID:612(primary_immunodeficiency_disease);DOID:7(disease_of_anatomical_entity);DOID:8469(influ…	R-HSA-1015702(Expression of IFN-induced genes);R-HSA-6798739(Exocytosis of azurophil granule membrane proteins);R-HSA-9735840(SARS-CoV-1 7a binds BST2)	30.5361	109.247	0.279515	-1.839	2.5895e-17	9.52816e-16	down	yes
ENSG00000126878	AIF1L	83543	ENST00000372309;ENST00000372314;ENST00000247291;ENST00000478257;ENST00000372301	GO:0003779(actin binding);GO:0005509(calcium ion binding);GO:0005515(protein binding);GO:0005737(cytoplasm);GO:0005856(cytoskeleton);GO:0005884(actin filament);GO:0005886(plasma membrane);GO:0005925(focal adhesion);GO:0015629(actin cytoskeleton);GO:0016020(membrane);GO:0032587(ruffle membrane);GO:0042995(cell projection);GO:0046872(metal ion binding);GO:0051015(actin filament binding);GO:0051017(…	NA	NA	NA	NA	allograft inflammatory factor 1 like [Source:HGNC Symbol;Acc:HGNC:28904]	protein_coding;nonsense_mediated_decay;retained_intron	NA	NA	2.37864	0.607525	3.9153	1.96912	2.63352e-17	9.66228e-16	up	yes
ENSG00000107771	CCSER2	54462	ENST00000372088;ENST00000224756;ENST00000494144;ENST00000359979	GO:0001578(microtubule bundle formation);GO:0005737(cytoplasm);GO:0005856(cytoskeleton);GO:0008017(microtubule binding);GO:0015630(microtubule cytoskeleton);GO:0015630(microtubule cytoskeleton)	NA	NA	NA	NA	coiled-coil serine rich protein 2 [Source:HGNC Symbol;Acc:HGNC:29197]	protein_coding;processed_transcript	NA	NA	0.954601	3.60355	0.264905	-1.91645	2.64137e-17	9.66333e-16	down	yes
ENSG00000170689	HOXB9	3219	ENST00000311177	GO:0000785(chromatin);GO:0000977(RNA polymerase II transcription regulatory region sequence-specific DNA binding);GO:0000978(RNA polymerase II cis-regulatory region sequence-specific DNA binding);GO:0000981(DNA-binding transcription factor activity, RNA polymerase II-specific);GO:0003677(DNA binding);GO:0003700(DNA-binding transcription factor activity);GO:0005515(protein binding);GO:0005634(nucl…	NA	NA	NA	Homeobox	homeobox B9 [Source:HGNC Symbol;Acc:HGNC:5120]	protein_coding	DOID:0050615(respiratory_system_cancer);DOID:0050686(organ_system_cancer);DOID:1324(lung_cancer);DOID:14566(disease_of_cellular_proliferation);DOID:162(cancer);DOID:3905(lung_carcinoma);DOID:3908(non_small_cell_lung_carcinoma);DOID:3910(lung_adenocarcinoma);DOID:4(disease)	NA	2.93721	11.1018	0.264571	-1.91827	2.70211e-17	9.85729e-16	down	yes
ENSG00000168890	TMEM150A	129303	ENST00000409668;ENST00000444380;ENST00000306353;ENST00000334462;ENST00000431593;ENST00000455852;ENST00000451147;ENST00000433956;ENST00000417791;ENST00000463363	GO:0005515(protein binding);GO:0005886(plasma membrane);GO:0005887(integral component of plasma membrane);GO:0009056(catabolic process);GO:0016020(membrane);GO:0016021(integral component of membrane);GO:0046854(phosphatidylinositol phosphate biosynthetic process);GO:0072659(protein localization to plasma membrane);GO:0110165(cellular anatomical entity);GO:0110165(cellular anatomical entity)	NA	NA	NA	NA	transmembrane protein 150A [Source:HGNC Symbol;Acc:HGNC:24677]	protein_coding;retained_intron;nonsense_mediated_decay	NA	NA	4.57369	16.651	0.274679	-1.86418	3.12926e-17	1.1383e-15	down	yes
ENSG00000153879	CEBPG	1054	ENST00000284000;ENST00000652630;ENST00000585933	GO:0000785(chromatin);GO:0000978(RNA polymerase II cis-regulatory region sequence-specific DNA binding);GO:0000981(DNA-binding transcription factor activity, RNA polymerase II-specific);GO:0001228(DNA-binding transcription activator activity, RNA polymerase II-specific);GO:0001889(liver development);GO:0003677(DNA binding);GO:0003700(DNA-binding transcription factor activity);GO:0005515(protein b…	05152(Tuberculosis);05152(Tuberculosis)	NA	NA	TF_bZIP	CCAAT enhancer binding protein gamma [Source:HGNC Symbol;Acc:HGNC:1837]	protein_coding;nonsense_mediated_decay	DOID:0050615(respiratory_system_cancer);DOID:0050686(organ_system_cancer);DOID:1324(lung_cancer);DOID:1325(bronchus_cancer);DOID:14566(disease_of_cellular_proliferation);DOID:162(cancer);DOID:3904(bronchus_carcinoma);DOID:4(disease)	R-HSA-1791118(Expression of ASNS (Asparagine Synthetase));R-HSA-9635912(Expression of TRIB3 in response to stress);R-HSA-9635915(ATF4 and CEBPB,CEBPG bind the ASNS gene);R-HSA-9635927(ATF4 and a CEBP protein bind the TRIB3 promoter);R-HSA-9653724(Transcription of ATF5);R-HSA-9653742(ATF4 and a CEBP protein bind the ATF5 promoter)	2.86761	10.5646	0.271436	-1.88131	3.17526e-17	1.15175e-15	down	yes
ENSG00000224877	NDUFAF8	284184	ENST00000573090;ENST00000431388;ENST00000577158;ENST00000575067;ENST00000573173;ENST00000576002	GO:0005515(protein binding);GO:0005739(mitochondrion);GO:0032981(mitochondrial respiratory chain complex I assembly);GO:0032981(mitochondrial respiratory chain complex I assembly)	NA	NA	NA	NA	NADH:ubiquinone oxidoreductase complex assembly factor 8 [Source:HGNC Symbol;Acc:HGNC:33551]	retained_intron;protein_coding;processed_transcript	NA	NA	43.2271	12.6457	3.41833	1.77329	3.90678e-17	1.41308e-15	up	yes
ENSG00000278903	ENSG00000278903		ENST00000692046;ENST00000689354;ENST00000624576;ENST00000701260;ENST00000701070;ENST00000688828;ENST00000623738;ENST00000623989;ENST00000688458;ENST00000689306;ENST00000692898;ENST00000692318;ENST00000624847	NA	NA	NA	NA	NA	novel transcript	lncRNA	NA	NA	0.921163	0.172422	5.34248	2.41751	4.13485e-17	1.49135e-15	up	yes
ENSG00000113504	SLC12A7	10723	ENST00000264930;ENST00000513223;ENST00000504576;ENST00000510943;ENST00000514994	GO:0005886(plasma membrane);GO:0005887(integral component of plasma membrane);GO:0006811(ion transport);GO:0006813(potassium ion transport);GO:0006884(cell volume homeostasis);GO:0007268(chemical synaptic transmission);GO:0008519(ammonium transmembrane transporter activity);GO:0015293(symporter activity);GO:0015377(cation:chloride symporter activity);GO:0015379(potassium:chloride symporter activi…	04966(Collecting duct acid secretion);04966(Collecting duct acid secretion)	NA	NA	NA	solute carrier family 12 member 7 [Source:HGNC Symbol;Acc:HGNC:10915]	protein_coding;nonsense_mediated_decay;retained_intron	DOID:14566(disease_of_cellular_proliferation);DOID:162(cancer);DOID:4(disease)	R-HSA-426155(SLC12A4,5,6,7 cotransport K+, Cl- from cytosol to extracellular region)	6.18013	21.8726	0.282551	-1.82342	4.36747e-17	1.57024e-15	down	yes
ENSG00000130052	STARD8	9754	ENST00000488088;ENST00000374599;ENST00000374597	GO:0005096(GTPase activator activity);GO:0005925(focal adhesion);GO:0007165(signal transduction);GO:0008289(lipid binding);GO:0030036(actin cytoskeleton organization);GO:0030054(cell junction);GO:0035023(regulation of Rho protein signal transduction);GO:0050790(regulation of catalytic activity);GO:0050790(regulation of catalytic activity)	NA	NA	NA	NA	StAR related lipid transfer domain containing 8 [Source:HGNC Symbol;Acc:HGNC:19161]	processed_transcript;protein_coding	NA	R-HSA-8981637(RHOA GAPs stimulate RHOA GTPase activity);R-HSA-9013022(RHOB GAPs stimulate RHOB GTPase activity);R-HSA-9013161(CDC42 GAPs stimulate CDC42 GTPase activity)	1.20536	0.269641	4.47026	2.16036	4.37818e-17	1.57024e-15	up	yes
ENSG00000234745	HLA-B	3106	ENST00000497377;ENST00000474381;ENST00000696560;ENST00000481849;ENST00000640094;ENST00000463574;ENST00000434333;ENST00000498007	GO:0000139(Golgi membrane);GO:0001916(positive regulation of T cell mediated cytotoxicity);GO:0002250(adaptive immune response);GO:0002376(immune system process);GO:0002474(antigen processing and presentation of peptide antigen via MHC class I);GO:0002486(antigen processing and presentation of endogenous peptide antigen via MHC class I via ER pathway, TAP-independent);GO:0002667(regulation of T c…	04144(Endocytosis);04145(Phagosome);04218(Cellular senescence);04514(Cell adhesion molecules);04612(Antigen processing and presentation);04650(Natural killer cell mediated cytotoxicity);04940(Type I diabetes mellitus);05163(Human cytomegalovirus infection);05165(Human papillomavirus infection);05166(Human T-cell leukemia virus 1 infection);05167(Kaposi sarcoma-associated herpesvirus infection);05…	NA	NA	NA	major histocompatibility complex, class I, B [Source:HGNC Symbol;Acc:HGNC:4932]	retained_intron;protein_coding	DOID:0014667(disease_of_metabolism);DOID:0050013(carbohydrate_metabolism_disease);DOID:0050117(disease_by_infectious_agent);DOID:0050155(sensory_system_disease);DOID:0050338(primary_bacterial_infectious_disease);DOID:0050686(organ_system_cancer);DOID:0050700(cardiomyopathy);DOID:0050828(artery_disease);DOID:0060005(autoimmune_disease_of_endocrine_system);DOID:0060031(autoimmune_disease_of_gastroi…	R-HSA-1015702(Expression of IFN-induced genes);R-HSA-1031716(Expression of IFNG-stimulated genes);R-HSA-1236943(Loading of antigen peptide onto MHC class I molecule);R-HSA-1236954(Trimming of peptides by IRAP in endocytic vesicles);R-HSA-1236964(Translocation of peptide bound MHC class I complex to cell surface);R-HSA-1236965(Export of peptide loaded MHC class I complex to PM);R-HSA-1236971(Pepti…	96.03	335.116	0.286557	-1.80311	4.84147e-17	1.73154e-15	down	yes
ENSG00000173166	RAPH1	65059	ENST00000319170;ENST00000418114;ENST00000465669;ENST00000308091;ENST00000420371	GO:0005515(protein binding);GO:0005737(cytoplasm);GO:0005829(cytosol);GO:0005856(cytoskeleton);GO:0005886(plasma membrane);GO:0007165(signal transduction);GO:0016020(membrane);GO:0016604(nuclear body);GO:0030027(lamellipodium);GO:0030175(filopodium);GO:0031252(cell leading edge);GO:0042995(cell projection);GO:0048675(axon extension);GO:0048675(axon extension)	NA	NA	NA	NA	Ras association (RalGDS/AF-6) and pleckstrin homology domains 1 [Source:HGNC Symbol;Acc:HGNC:14436]	protein_coding;retained_intron	NA	NA	0.504789	1.93072	0.261451	-1.93539	5.80013e-17	2.06861e-15	down	yes
ENSG00000132967	HMGB1P5	10354	ENST00000451497;ENST00000255320	NA	NA	NA	NA	NA	high mobility group box 1 pseudogene 5 [Source:HGNC Symbol;Acc:HGNC:4997]	processed_transcript;transcribed_processed_pseudogene	NA	NA	33.4006	9.67085	3.45374	1.78816	6.31317e-17	2.24531e-15	up	yes
ENSG00000165949	IFI27	3429	ENST00000616764;ENST00000614204;ENST00000618863;ENST00000614648;ENST00000612499;ENST00000612813;ENST00000618200;ENST00000621160;ENST00000555081;ENST00000614288;ENST00000611954;ENST00000557700	GO:0000122(negative regulation of transcription by RNA polymerase II);GO:0002376(immune system process);GO:0003674(molecular_function);GO:0005515(protein binding);GO:0005521(lamin binding);GO:0005634(nucleus);GO:0005635(nuclear envelope);GO:0005637(nuclear inner membrane);GO:0005739(mitochondrion);GO:0005741(mitochondrial outer membrane);GO:0005783(endoplasmic reticulum);GO:0005789(endoplasmic re…	NA	NA	NA	NA	interferon alpha inducible protein 27 [Source:HGNC Symbol;Acc:HGNC:5397]	protein_coding;retained_intron;nonsense_mediated_decay	DOID:0050161(lower_respiratory_tract_disease);DOID:0050686(organ_system_cancer);DOID:0050687(cell_type_cancer);DOID:120(female_reproductive_organ_cancer);DOID:1289(neurodegenerative_disease);DOID:14566(disease_of_cellular_proliferation);DOID:1579(respiratory_system_disease);DOID:162(cancer);DOID:1749(squamous_cell_carcinoma);DOID:193(reproductive_organ_cancer);DOID:2377(multiple_sclerosis);DOID:2…	R-HSA-1015702(Expression of IFN-induced genes)	11.7365	41.0952	0.285593	-1.80797	6.95683e-17	2.46735e-15	down	yes
ENSG00000128513	POT1	25913	ENST00000668382;ENST00000609702;ENST00000393329;ENST00000664330;ENST00000608200;ENST00000466483;ENST00000610141;ENST00000430927;ENST00000429326;ENST00000607932;ENST00000357628	GO:0000723(telomere maintenance);GO:0000781(chromosome, telomeric region);GO:0000783(nuclear telomere cap complex);GO:0003677(DNA binding);GO:0005515(protein binding);GO:0005634(nucleus);GO:0005654(nucleoplasm);GO:0005694(chromosome);GO:0007004(telomere maintenance via telomerase);GO:0010521(telomerase inhibitor activity);GO:0016233(telomere capping);GO:0017151(DEAD/H-box RNA helicase binding);GO…	NA	NA	NA	NA	protection of telomeres 1 [Source:HGNC Symbol;Acc:HGNC:17284]	protein_coding;nonsense_mediated_decay;processed_transcript;retained_intron	DOID:14566(disease_of_cellular_proliferation);DOID:162(cancer);DOID:4(disease)	R-HSA-163090(Elongation Of The Telomeric Chromosome End);R-HSA-163096(Recruitment of Telomerase RNP to the Telomeric Chromosome End);R-HSA-163099(Alignment Of The RNA Template On The Telomeric Chromosome End);R-HSA-163120(Disassociation of Telomerase RNP and the Chromosome End);R-HSA-164617(Elongation of Extended Telomeric Chromosome End);R-HSA-164620(Translocation Of Telomerase RNP And Alignment…	0.410996	1.65222	0.248753	-2.00721	7.04528e-17	2.4918e-15	down	yes
ENSG00000243716	NPIPB5	100132247,23117	ENST00000415654;ENST00000517539;ENST00000424340;ENST00000546168;ENST00000442450;ENST00000356156;ENST00000544308;ENST00000521555;ENST00000538590;ENST00000541664;ENST00000541154;ENST00000517347;ENST00000539604;ENST00000538509;ENST00000539929;ENST00000540704;ENST00000415833;ENST00000543407;ENST00000536620;ENST00000542518	GO:0005654(nucleoplasm);GO:0016020(membrane);GO:0016021(integral component of membrane);GO:0016021(integral component of membrane)	NA	NA	NA	NA	nuclear pore complex interacting protein family member B5 [Source:HGNC Symbol;Acc:HGNC:37233]	processed_transcript;protein_coding;retained_intron;nonsense_mediated_decay	NA	NA	0.799685	2.94967	0.27111	-1.88305	7.16716e-17	2.52791e-15	down	yes
ENSG00000188818	ZDHHC11	79844	ENST00000511539;ENST00000512775;ENST00000688955;ENST00000283441;ENST00000503758;ENST00000503880;ENST00000511193;ENST00000507800;ENST00000512190	GO:0002230(positive regulation of defense response to virus by host);GO:0005515(protein binding);GO:0005783(endoplasmic reticulum);GO:0005789(endoplasmic reticulum membrane);GO:0005794(Golgi apparatus);GO:0006612(protein targeting to membrane);GO:0010008(endosome membrane);GO:0016020(membrane);GO:0016021(integral component of membrane);GO:0016409(palmitoyltransferase activity);GO:0016740(transfer…	NA	K20027	EC:2.3.1.225	NA	zinc finger DHHC-type containing 11 [Source:HGNC Symbol;Acc:HGNC:19158]	protein_coding;processed_transcript;retained_intron;nonsense_mediated_decay	DOID:0050686(organ_system_cancer);DOID:11054(urinary_bladder_cancer);DOID:14566(disease_of_cellular_proliferation);DOID:162(cancer);DOID:3996(urinary_system_cancer);DOID:4(disease)	R-HSA-9694341(Spike protein gets palmitoylated)	0.124557	0.679201	0.183388	-2.44703	8.18202e-17	2.87791e-15	down	yes
ENSG00000168061	SAC3D1	29901	ENST00000531072;ENST00000674184;ENST00000652489;ENST00000398846;ENST00000533017	GO:0032991(protein-containing complex);GO:0032991(protein-containing complex)	NA	NA	NA	NA	SAC3 domain containing 1 [Source:HGNC Symbol;Acc:HGNC:30179]	protein_coding;processed_transcript	NA	NA	23.0179	6.69674	3.43718	1.78122	8.28038e-17	2.9045e-15	up	yes
ENSG00000116062	MSH6	2956	ENST00000652107;ENST00000700009;ENST00000445503;ENST00000700003;ENST00000700011;ENST00000234420;ENST00000700007;ENST00000700006;ENST00000700005;ENST00000700001;ENST00000699999	GO:0000166(nucleotide binding);GO:0000287(magnesium ion binding);GO:0000400(four-way junction DNA binding);GO:0000710(meiotic mismatch repair);GO:0000785(chromatin);GO:0003677(DNA binding);GO:0003682(chromatin binding);GO:0003684(damaged DNA binding);GO:0003690(double-stranded DNA binding);GO:0005515(protein binding);GO:0005524(ATP binding);GO:0005634(nucleus);GO:0005654(nucleoplasm);GO:0005694(c…	01524(Platinum drug resistance);03430(Mismatch repair);05200(Pathways in cancer);05210(Colorectal cancer);05210(Colorectal cancer)	NA	NA	NA	mutS homolog 6 [Source:HGNC Symbol;Acc:HGNC:7329]	protein_coding;retained_intron;nonsense_mediated_decay	DOID:0050686(organ_system_cancer);DOID:0080001(bone_disease);DOID:11054(urinary_bladder_cancer);DOID:14566(disease_of_cellular_proliferation);DOID:162(cancer);DOID:17(musculoskeletal_system_disease);DOID:225(syndrome);DOID:3342(bone_inflammation_disease);DOID:3996(urinary_system_cancer);DOID:4007(bladder_carcinoma);DOID:4(disease);DOID:7148(rheumatoid_arthritis);DOID:7(disease_of_anatomical_entit…	R-HSA-5358510(MSH2:MSH6 recruits MLH1:PMS2 to mismatch and interacts with PCNA);R-HSA-5358518(MLH1:PMS2 makes single strand incision near 1-2 base mismatch);R-HSA-5358525(MSH2:MSH6 binds 1 base mismatch or 1-2 base insertion/deletion loop);R-HSA-5358597(EXO1 interacts with MSH2:MSH6 (MutSalpha) and MLH1:PMS2 (MutLalpha));R-HSA-5358599(EXO1 interacting with MSH2:MSH6 excises single strand DNA cont…	2.36398	0.689992	3.4261	1.77657	9.35211e-17	3.27144e-15	up	yes
ENSG00000105499	PLA2G4C	8605	ENST00000597713;ENST00000354276;ENST00000594790;ENST00000596353;ENST00000599063;ENST00000599921;ENST00000599300;ENST00000599239;ENST00000598457;ENST00000598185;ENST00000593765;ENST00000600170;ENST00000595161;ENST00000599111	GO:0004620(phospholipase activity);GO:0004622(lysophospholipase activity);GO:0004623(phospholipase A2 activity);GO:0005509(calcium ion binding);GO:0005515(protein binding);GO:0005543(phospholipid binding);GO:0005544(calcium-dependent phospholipid binding);GO:0005635(nuclear envelope);GO:0005654(nucleoplasm);GO:0005739(mitochondrion);GO:0005783(endoplasmic reticulum);GO:0005789(endoplasmic reticul…	00564(Glycerophospholipid metabolism);00565(Ether lipid metabolism);00590(Arachidonic acid metabolism);00591(Linoleic acid metabolism);00592(alpha-Linolenic acid metabolism);01100(Metabolic pathways);04010(MAPK signaling pathway);04014(Ras signaling pathway);04072(Phospholipase D signaling pathway);04217(Necroptosis);04270(Vascular smooth muscle contraction);04370(VEGF signaling pathway);04611(Pl…	K16342	EC:3.1.1.4	NA	phospholipase A2 group IVC [Source:HGNC Symbol;Acc:HGNC:9037]	nonsense_mediated_decay;protein_coding;retained_intron;processed_transcript	DOID:14566(disease_of_cellular_proliferation);DOID:150(disease_of_mental_health);DOID:1561(cognitive_disorder);DOID:162(cancer);DOID:2468(psychotic_disorder);DOID:4(disease);DOID:5419(schizophrenia)	R-HSA-1482545(2-acyl LPE is hydrolyzed to GPETA by PLA2G4C);R-HSA-1482571(1-acyl LPE is hydrolyzed to GPETA by PLA2G4C);R-HSA-1482629(2-acyl LPC is hydrolyzed to GPCho by PLA2G4C);R-HSA-1482696(1-acyl LPC is hydrolyzed to GPCho by PLA2G4C);R-HSA-1482816(PC is hydrolyzed to 1-acyl LPC by PLA2[6]);R-HSA-1482827(PC is hydrolyzed to 2-acyl LPC by PLA2G4C);R-HSA-1482868(PI is hydrolyzed to 1-acyl LPI …	0.131036	0.716391	0.182912	-2.45078	9.55043e-17	3.32997e-15	down	yes
ENSG00000167716	WDR81	124997	ENST00000409644;ENST00000464528;ENST00000419248;ENST00000492901;ENST00000575206;ENST00000479966;ENST00000446363;ENST00000495411;ENST00000455636;ENST00000437219;ENST00000468539	GO:0000421(autophagosome membrane);GO:0005515(protein binding);GO:0005737(cytoplasm);GO:0005739(mitochondrion);GO:0005764(lysosome);GO:0005765(lysosomal membrane);GO:0005768(endosome);GO:0005829(cytosol);GO:0006511(ubiquitin-dependent protein catabolic process);GO:0007005(mitochondrion organization);GO:0016020(membrane);GO:0031313(extrinsic component of endosome membrane);GO:0031410(cytoplasmic v…	NA	NA	NA	NA	WD repeat domain 81 [Source:HGNC Symbol;Acc:HGNC:26600]	protein_coding;retained_intron	NA	R-HSA-9013157(CDC42 binds effectors at the plasma membrane)	5.9917	20.8551	0.287302	-1.79936	9.57158e-17	3.32997e-15	down	yes
ENSG00000125872	LRRN4	164312,4034	ENST00000698795;ENST00000698797;ENST00000378858;ENST00000698796	GO:0005515(protein binding);GO:0005887(integral component of plasma membrane);GO:0007616(long-term memory);GO:0008542(visual learning);GO:0016020(membrane);GO:0016021(integral component of membrane);GO:0070062(extracellular exosome);GO:0070062(extracellular exosome)	NA	NA	NA	NA	leucine rich repeat neuronal 4 [Source:HGNC Symbol;Acc:HGNC:16208]	protein_coding;retained_intron	NA	NA	20.7669	6.25639	3.31931	1.73088	1.01563e-16	3.5238e-15	up	yes
ENSG00000162618	ADGRL4	64123	ENST00000662530;ENST00000662895;ENST00000656300;ENST00000661030;ENST00000659100;ENST00000664452	GO:0004888(transmembrane signaling receptor activity);GO:0004930(G protein-coupled receptor activity);GO:0005509(calcium ion binding);GO:0005886(plasma membrane);GO:0005887(integral component of plasma membrane);GO:0007165(signal transduction);GO:0007166(cell surface receptor signaling pathway);GO:0007186(G protein-coupled receptor signaling pathway);GO:0007189(adenylate cyclase-activating G prot…	NA	NA	NA	NA	adhesion G protein-coupled receptor L4 [Source:HGNC Symbol;Acc:HGNC:20822]	protein_coding;nonsense_mediated_decay;processed_transcript;retained_intron	NA	NA	0.179682	0.915104	0.196351	-2.34849	1.03456e-16	3.57974e-15	down	yes
ENSG00000065911	MTHFD2	10797	ENST00000394053;ENST00000470592;ENST00000677299;ENST00000489041;ENST00000678633;ENST00000462026;ENST00000678955;ENST00000678228;ENST00000477455;ENST00000409804;ENST00000679055;ENST00000677558;ENST00000488086;ENST00000678731	GO:0000287(magnesium ion binding);GO:0003824(catalytic activity);GO:0004477(methenyltetrahydrofolate cyclohydrolase activity);GO:0004487(methylenetetrahydrofolate dehydrogenase (NAD+) activity);GO:0004488(methylenetetrahydrofolate dehydrogenase (NADP+) activity);GO:0005515(protein binding);GO:0005615(extracellular space);GO:0005739(mitochondrion);GO:0005759(mitochondrial matrix);GO:0006730(one-ca…	00670(One carbon pool by folate);01100(Metabolic pathways);01240(Biosynthesis of cofactors);01240(Biosynthesis of cofactors)	K13403	EC:1.5.1.15;EC:3.5.4.9	NA	methylenetetrahydrofolate dehydrogenase (NADP+ dependent) 2, methenyltetrahydrofolate cyclohydrolase [Source:HGNC Symbol;Acc:HGNC:7434]	protein_coding;nonsense_mediated_decay;retained_intron;processed_transcript	NA	R-HSA-6801328(MTHFD2, D2L oxidise 5,10-methylene-THF to 5,10-methenyl-THF);R-HSA-6801462(MTHFD2, D2L oxidise 5,10-methenyl-THF to 10-formyl-THF)	4.70247	16.3058	0.288392	-1.7939	1.12067e-16	3.86723e-15	down	yes
ENSG00000118785	SPP1	6696,30827	ENST00000683620;ENST00000682554;ENST00000682448;ENST00000237623;ENST00000508002;ENST00000684710;ENST00000683168;ENST00000395080;ENST00000682655	GO:0001503(ossification);GO:0001649(osteoblast differentiation);GO:0005125(cytokine activity);GO:0005178(integrin binding);GO:0005515(protein binding);GO:0005576(extracellular region);GO:0005615(extracellular space);GO:0005788(endoplasmic reticulum lumen);GO:0005794(Golgi apparatus);GO:0006710(androgen catabolic process);GO:0006954(inflammatory response);GO:0007155(cell adhesion);GO:0007165(signa…	04151(PI3K-Akt signaling pathway);04371(Apelin signaling pathway);04510(Focal adhesion);04512(ECM-receptor interaction);04620(Toll-like receptor signaling pathway);04929(GnRH secretion);05165(Human papillomavirus infection);05165(Human papillomavirus infection)	NA	NA	NA	secreted phosphoprotein 1 [Source:HGNC Symbol;Acc:HGNC:11255]	retained_intron;protein_coding	DOID:0014667(disease_of_metabolism);DOID:0050013(carbohydrate_metabolism_disease);DOID:0050117(disease_by_infectious_agent);DOID:0050161(lower_respiratory_tract_disease);DOID:0050177(monogenic_disease);DOID:0050567(orofacial_cleft);DOID:0050615(respiratory_system_cancer);DOID:0050686(organ_system_cancer);DOID:0050687(cell_type_cancer);DOID:0050700(cardiomyopathy);DOID:0050736(autosomal_dominant_d…	R-HSA-216061(SPP1 (osteopontin) binds integrin alpha8beta1);R-HSA-265424(SPP1 (osteopontin) binds integrin alpha5beta1, alpha9beta1);R-HSA-2752115(SPP1 (osteopontin) binds CD44);R-HSA-2752118(SPP1 (osteopontin) binds Integrin alpha4beta1);R-HSA-2752125(SPP1 (osteopontin) binds integrins alphaVbeta1, alphaVbeta3, alphaVbeta5);R-HSA-382054(PDGF binds to extracellular matrix proteins);R-HSA-4086205(…	0.163303	0.801629	0.203714	-2.29539	1.14366e-16	3.9359e-15	down	yes
ENSG00000179750	APOBEC3B	9582	ENST00000402182;ENST00000333467;ENST00000335760	GO:0000932(P-body);GO:0002376(immune system process);GO:0003723(RNA binding);GO:0003824(catalytic activity);GO:0004126(cytidine deaminase activity);GO:0005515(protein binding);GO:0005634(nucleus);GO:0005654(nucleoplasm);GO:0005737(cytoplasm);GO:0008270(zinc ion binding);GO:0009972(cytidine deamination);GO:0010529(negative regulation of transposition);GO:0016554(cytidine to uridine editing);GO:001…	05170(Human immunodeficiency virus 1 infection);05170(Human immunodeficiency virus 1 infection)	NA	NA	NA	apolipoprotein B mRNA editing enzyme catalytic subunit 3B [Source:HGNC Symbol;Acc:HGNC:17352]	protein_coding;nonsense_mediated_decay	DOID:0050117(disease_by_infectious_agent);DOID:2043(hepatitis_B);DOID:2237(hepatitis);DOID:3118(hepatobiliary_disease);DOID:409(liver_disease);DOID:4(disease);DOID:526(Human_immunodeficiency_virus_infectious_disease);DOID:635(acquired_immunodeficiency_syndrome);DOID:77(gastrointestinal_system_disease);DOID:7(disease_of_anatomical_entity);DOID:934(viral_infectious_disease)	R-HSA-77609(Binding of APOBEC-1 to form editosome);R-HSA-83677(C4 deamination of cytidine)	56.0439	16.9349	3.30937	1.72656	1.19221e-16	4.09197e-15	up	yes
ENSG00000011052	NME1-NME2	654364	ENST00000393193;ENST00000376392;ENST00000555572	GO:0000166(nucleotide binding);GO:0004550(nucleoside diphosphate kinase activity);GO:0005524(ATP binding);GO:0005829(cytosol);GO:0006165(nucleoside diphosphate phosphorylation);GO:0006183(GTP biosynthetic process);GO:0006228(UTP biosynthetic process);GO:0006241(CTP biosynthetic process);GO:0016301(kinase activity);GO:0016310(phosphorylation);GO:0016740(transferase activity);GO:0016740(transferase…	00230(Purine metabolism);00240(Pyrimidine metabolism);00983(Drug metabolism - other enzymes);01100(Metabolic pathways);01240(Biosynthesis of cofactors);01240(Biosynthesis of cofactors)	K00940	EC:2.7.4.6	NA	NME1-NME2 readthrough [Source:HGNC Symbol;Acc:HGNC:33531]	protein_coding	NA	R-HSA-482619((d)NDP + ATP <=> (d)NTP + ADP (NME1,2,3));R-HSA-482621((d)NTP + ADP <=> (d)NDP + ATP (NME1,2,3));R-HSA-6798748(Exocytosis of secretory granule lumen proteins);R-HSA-6800434(Exocytosis of ficolin-rich granule lumen proteins);R-HSA-9748969(NME1:2 hexamer phosphorylates 6TdGDP to 6TdGTP);R-HSA-9748999(NME1:2 hexamer phosphorylates 6TGDP to 6TGTP);R-HSA-9755013(NME1,2 hexamers phosphoryl…	152.652	46.5162	3.28169	1.71444	1.29275e-16	4.42516e-15	up	yes
ENSG00000116830	TTF2	8458,2304	ENST00000369466;ENST00000480701;ENST00000470935;ENST00000469638;ENST00000463696	GO:0000166(nucleotide binding);GO:0003677(DNA binding);GO:0004386(helicase activity);GO:0005515(protein binding);GO:0005524(ATP binding);GO:0005634(nucleus);GO:0005681(spliceosomal complex);GO:0005737(cytoplasm);GO:0005829(cytosol);GO:0006338(chromatin remodeling);GO:0006353(DNA-templated transcription termination);GO:0006369(termination of RNA polymerase II transcription);GO:0006397(mRNA process…	04918(Thyroid hormone synthesis);04918(Thyroid hormone synthesis)	NA	NA	NA	transcription termination factor 2 [Source:HGNC Symbol;Acc:HGNC:12398]	protein_coding;processed_transcript	NA	NA	3.17001	0.919337	3.44815	1.78582	1.33994e-16	4.57444e-15	up	yes
ENSG00000198554	WDHD1	11169	ENST00000360586;ENST00000420358;ENST00000475379	GO:0000278(mitotic cell cycle);GO:0003677(DNA binding);GO:0003682(chromatin binding);GO:0005515(protein binding);GO:0005634(nucleus);GO:0005654(nucleoplasm);GO:0005737(cytoplasm);GO:0006261(DNA-templated DNA replication);GO:0006281(DNA repair);GO:0043229(intracellular organelle);GO:0043596(nuclear replication fork);GO:0043596(nuclear replication fork)	NA	NA	NA	HMG	WD repeat and HMG-box DNA binding protein 1 [Source:HGNC Symbol;Acc:HGNC:23170]	protein_coding;retained_intron	NA	NA	1.46866	0.368475	3.98577	1.99486	1.44452e-16	4.91829e-15	up	yes
ENSG00000134574	DDB2	1643	ENST00000378601;ENST00000256996;ENST00000612309;ENST00000615695;ENST00000622090;ENST00000617022;ENST00000617847;ENST00000614394;ENST00000378600;ENST00000622878;ENST00000614884;ENST00000616278;ENST00000614825;ENST00000610805	GO:0000209(protein polyubiquitination);GO:0003677(DNA binding);GO:0003684(damaged DNA binding);GO:0004842(ubiquitin-protein transferase activity);GO:0005515(protein binding);GO:0005634(nucleus);GO:0005654(nucleoplasm);GO:0006281(DNA repair);GO:0006289(nucleotide-excision repair);GO:0006290(pyrimidine dimer repair);GO:0006974(cellular response to DNA damage stimulus);GO:0009411(response to UV);GO:…	03420(Nucleotide excision repair);04115(p53 signaling pathway);04120(Ubiquitin mediated proteolysis);05161(Hepatitis B);05169(Epstein-Barr virus infection);05200(Pathways in cancer);05202(Transcriptional misregulation in cancer);05210(Colorectal cancer);05212(Pancreatic cancer);05213(Endometrial cancer);05214(Glioma);05216(Thyroid cancer);05217(Basal cell carcinoma);05218(Melanoma);05220(Chronic …	NA	NA	NA	damage specific DNA binding protein 2 [Source:HGNC Symbol;Acc:HGNC:2718]	nonsense_mediated_decay;protein_coding;retained_intron	DOID:0050117(disease_by_infectious_agent);DOID:0050177(monogenic_disease);DOID:0050736(autosomal_dominant_disease);DOID:0050739(autosomal_genetic_disease);DOID:14566(disease_of_cellular_proliferation);DOID:162(cancer);DOID:2043(hepatitis_B);DOID:2237(hepatitis);DOID:3118(hepatobiliary_disease);DOID:409(liver_disease);DOID:4(disease);DOID:5683(hereditary_breast_ovarian_cancer);DOID:630(genetic_dis…	R-HSA-5689317(Formation of the pre-incision complex in GG-NER);R-HSA-5689861(Recruitment of XPA and release of CAK );R-HSA-5690213(DNA polymerases delta, epsilon or kappa bind the GG-NER site);R-HSA-5690988(3'-incision of DNA by ERCC5 (XPG) in GG-NER);R-HSA-5690990(5'- incision of DNA by ERCC1:ERCC4 in GG-NER);R-HSA-5690991(Binding of ERCC1:ERCC4 (ERCC1:XPF) to pre-incision complex in GG-NER);R-H…	7.86868	2.29626	3.42674	1.77683	1.53868e-16	5.22498e-15	up	yes
ENSG00000001617	SEMA3F	6405	ENST00000002829;ENST00000450338;ENST00000434342;ENST00000426511;ENST00000413852;ENST00000414301;ENST00000470737;ENST00000493743	GO:0001755(neural crest cell migration);GO:0005102(signaling receptor binding);GO:0005515(protein binding);GO:0005576(extracellular region);GO:0005615(extracellular space);GO:0005887(integral component of plasma membrane);GO:0007165(signal transduction);GO:0007411(axon guidance);GO:0021612(facial nerve structural organization);GO:0021637(trigeminal nerve structural organization);GO:0021675(nerve …	04360(Axon guidance);04360(Axon guidance)	NA	NA	NA	semaphorin 3F [Source:HGNC Symbol;Acc:HGNC:10728]	protein_coding;retained_intron	DOID:0050621(respiratory_system_benign_neoplasm);DOID:0060037(developmental_disorder_of_mental_health);DOID:0060038(specific_developmental_disorder);DOID:0060072(benign_neoplasm);DOID:0060085(organ_system_benign_neoplasm);DOID:1059(intellectual_disability);DOID:14566(disease_of_cellular_proliferation);DOID:150(disease_of_mental_health);DOID:162(cancer);DOID:3683(lung_benign_neoplasm);DOID:4(disea…	NA	1.53776	5.66126	0.271629	-1.88029	1.57361e-16	5.32941e-15	down	yes
ENSG00000270647	TAF15	8148	ENST00000604841;ENST00000605844;ENST00000603067;ENST00000603346;ENST00000687618;ENST00000604694;ENST00000603427;ENST00000604879;ENST00000605649;ENST00000604434;ENST00000605197;ENST00000689923;ENST00000603967	GO:0003676(nucleic acid binding);GO:0003677(DNA binding);GO:0003712(transcription coregulator activity);GO:0003723(RNA binding);GO:0003730(mRNA 3'-UTR binding);GO:0005515(protein binding);GO:0005634(nucleus);GO:0005654(nucleoplasm);GO:0005737(cytoplasm);GO:0006355(regulation of DNA-templated transcription);GO:0008380(RNA splicing);GO:0010467(gene expression);GO:0045893(positive regulation of DNA-…	03022(Basal transcription factors);05202(Transcriptional misregulation in cancer);05202(Transcriptional misregulation in cancer)	NA	NA	NA	TATA-box binding protein associated factor 15 [Source:HGNC Symbol;Acc:HGNC:11547]	protein_coding;retained_intron;nonsense_mediated_decay	DOID:0050686(organ_system_cancer);DOID:0060083(immune_system_cancer);DOID:1240(leukemia);DOID:12603(acute_leukemia);DOID:1289(neurodegenerative_disease);DOID:14566(disease_of_cellular_proliferation);DOID:162(cancer);DOID:230(lateral_sclerosis);DOID:231(motor_neuron_disease);DOID:2531(hematologic_cancer);DOID:331(central_nervous_system_disease);DOID:332(amyotrophic_lateral_sclerosis);DOID:4(diseas…	R-HSA-109636(Recognition and Binding of Core Promoter Elements by TFIID);R-HSA-109637(Binding of TFIIA and TFIIB to the pol II promoter:TFIID complex);R-HSA-109638(Recruitment of RNA Polymerase II Holoenzyme by TFIIF to the pol II promoter:TFIID:TFIIA:TFIIB complex);R-HSA-109639(Formation of the closed pre-initiation complex);R-HSA-167097(HIV Promoter Opening: First Transition);R-HSA-167113(Addit…	16.5161	5.05728	3.26582	1.70744	1.60013e-16	5.40489e-15	up	yes
ENSG00000224032	EPB41L4A-AS1	114915	ENST00000663232;ENST00000427306;ENST00000690733;ENST00000702181;ENST00000702686	NA	NA	NA	NA	NA	EPB41L4A antisense RNA 1 [Source:HGNC Symbol;Acc:HGNC:30749]	lncRNA	NA	NA	2.87067	10.2202	0.280881	-1.83197	1.77459e-16	5.97836e-15	down	yes
ENSG00000139112	GABARAPL1	23710	ENST00000266458;ENST00000541960;ENST00000546017;ENST00000545859;ENST00000540424;ENST00000537201;ENST00000629504;ENST00000545047;ENST00000541453;ENST00000421801;ENST00000539408	GO:0000045(autophagosome assembly);GO:0000421(autophagosome membrane);GO:0000422(autophagy of mitochondrion);GO:0005515(protein binding);GO:0005737(cytoplasm);GO:0005739(mitochondrion);GO:0005776(autophagosome);GO:0005783(endoplasmic reticulum);GO:0005794(Golgi apparatus);GO:0005829(cytosol);GO:0005856(cytoskeleton);GO:0005874(microtubule);GO:0006914(autophagy);GO:0006995(cellular response to nit…	04068(FoxO signaling pathway);04136(Autophagy - other);04137(Mitophagy - animal);04140(Autophagy - animal);04371(Apelin signaling pathway);04621(NOD-like receptor signaling pathway);04727(GABAergic synapse);05014(Amyotrophic lateral sclerosis);05022(Pathways of neurodegeneration - multiple diseases);05131(Shigellosis);05167(Kaposi sarcoma-associated herpesvirus infection);05167(Kaposi sarcoma-ass…	NA	NA	NA	GABA type A receptor associated protein like 1 [Source:HGNC Symbol;Acc:HGNC:4068]	protein_coding;nonsense_mediated_decay	NA	R-HSA-5678490(ATG16L1 complex transfers LC3 from ATG3 to PE);R-HSA-5681981(ATG3 transfers LC3 from ATG7 to ATG3);R-HSA-5681987(LC3 is cleaved by ATG4);R-HSA-5682011(LC3 binds ATG7 dimer);R-HSA-5682377(LC3 de-lipidation by ATG4);R-HSA-5682388(Autophagosome maturation);R-HSA-5682896(LC3:ATG7 dimer binds ATG3);R-HSA-5683593(ATG7:ATG3:LC3 dissociates)	10.9356	37.6306	0.290603	-1.78288	1.80851e-16	6.0766e-15	down	yes
ENSG00000103876	FAH	2184,2175	ENST00000407106;ENST00000561421;ENST00000537726;ENST00000683593;ENST00000558767;ENST00000558514;ENST00000539156;ENST00000261755;ENST00000559217;ENST00000559542;ENST00000684569	GO:0003824(catalytic activity);GO:0004334(fumarylacetoacetase activity);GO:0005515(protein binding);GO:0005829(cytosol);GO:0006527(arginine catabolic process);GO:0006559(L-phenylalanine catabolic process);GO:0006572(tyrosine catabolic process);GO:0006629(lipid metabolic process);GO:0009072(aromatic amino acid family metabolic process);GO:0016787(hydrolase activity);GO:0046872(metal ion binding);G…	00350(Tyrosine metabolism);01100(Metabolic pathways);01100(Metabolic pathways)	K01555	EC:3.7.1.2	NA	fumarylacetoacetate hydrolase [Source:HGNC Symbol;Acc:HGNC:3579]	protein_coding;retained_intron;processed_transcript	NA	R-HSA-71181(fumarylacetoacetate => fumarate + acetoacetate)	2.16083	0.612797	3.52618	1.81811	1.87122e-16	6.27079e-15	up	yes
ENSG00000163565	IFI16	3428	ENST00000295809;ENST00000368132;ENST00000448393;ENST00000368131;ENST00000474473;ENST00000562225;ENST00000493884;ENST00000483916	GO:0000122(negative regulation of transcription by RNA polymerase II);GO:0001819(positive regulation of cytokine production);GO:0002218(activation of innate immune response);GO:0002376(immune system process);GO:0003677(DNA binding);GO:0003690(double-stranded DNA binding);GO:0003723(RNA binding);GO:0005515(protein binding);GO:0005634(nucleus);GO:0005654(nucleoplasm);GO:0005730(nucleolus);GO:000573…	04621(NOD-like receptor signaling pathway);04621(NOD-like receptor signaling pathway)	NA	NA	NA	interferon gamma inducible protein 16 [Source:HGNC Symbol;Acc:HGNC:5395]	protein_coding;retained_intron	DOID:0050686(organ_system_cancer);DOID:0060056(hypersensitivity_reaction_disease);DOID:10283(prostate_cancer);DOID:120(female_reproductive_organ_cancer);DOID:14566(disease_of_cellular_proliferation);DOID:162(cancer);DOID:193(reproductive_organ_cancer);DOID:2154(nephroblastoma);DOID:263(kidney_cancer);DOID:2893(cervix_carcinoma);DOID:2914(immune_system_disease);DOID:3744(cervical_squamous_cell_car…	R-HSA-1834939(STING recruits TBK1 and IRF3);R-HSA-1834951(IFI16 binds cytosolic dsDNA)	4.10815	14.291	0.287465	-1.79854	1.94533e-16	6.50209e-15	down	yes
ENSG00000260920	ENSG00000260920		ENST00000565390	NA	NA	NA	NA	NA	novel transcript, sense overlapping with ZNF643	lncRNA	NA	NA	0.500347	2.39671	0.208764	-2.26006	2.03816e-16	6.79458e-15	down	yes
[truncated: 24,821 more rows]
