# Supplementary material for: CircBARD1 suppresses tumor progression driven by H3K18 lactylation- CCNA2 axis in human bladder cancer
Source: Research Square preprint supplement (doi:10.21203/rs.3.rs-7337848/v1), 2025-08-29
Supplement: Supplementary file 3 [file f3b41f718a369b9dcb6e8de0.docx]

**CircBARD1 suppresses tumor progression driven by H3K18 lactylation-CCNA2 axis in human bladder cancer**

#Zhenghui Hu1, #Nan Jiang3, #Bo Xie1, Juntao Lin1, Xianwu Chen1, Xuejian Zhou1, Yan Zhang1, Mengjing Fan2, Ning He1, *Xiaodong Jin3, *Feifan Wang1

1Department of Urology, The First Affiliated Hospital, Zhejiang University School of Medicine, Hangzhou, Zhejiang, 310003, R.P. China.

2 Department of Pathology, Sir Run Run Shaw Hospital, Zhejiang University School of Medicine, Hangzhou, Zhejiang, 310016, R.P. China.

3Department of Urology, The First Affiliated Hospital, Zhejiang Chinese Medical University, Hangzhou, Zhejiang, 310000, R.P. China.

#Zhenghui Hu and Nan Jiang contributed equally to this work.

**Correspondence:**

Feifan Wang, Department of Urology, The First Affiliated Hospital, Zhejiang University School of Medicine, Hangzhou, Zhejiang, 310003, R.P. China;

E-mail: 1322083@zju.edu.cn

Xiaodong Jin, Department of Urology, The First Affiliated Hospital, Zhejiang Chinese Medical University, Hangzhou, Zhejiang, 310000, R.P. China;

E-mail: 20233003@zcmu.edu.cn

**Table S1. Detailed information of our own 20 bladder cancer patients is listed**

| Patient number | Age at surgery | Gender | Grade | T | N | M | AJCC clinical stage |
| --- | --- | --- | --- | --- | --- | --- | --- |
| 1 | 69 | Female | High | Ta | N0 | M0 | Ta |
| 2 | 57 | Male | High | T2a | N0 | M0 | 2 |
| 3 | 52 | Male | Low | T4b | N0 | M0 | 4 |
| 4 | 71 | Male | High | T1 | N1 | M0 | 4 |
| 5 | 77 | Male | High | T3 | N0 | M0 | 3 |
| 6 | 65 | Male | High | T1 | N0 | M0 | 1 |
| 7 | 50 | Male | High | Ta | N0 | M0 | Ta |
| 8 | 63 | Male | High | T1 | N0 | M0 | 1 |
| 9 | 72 | Female | High | Ta | N0 | M0 | Ta |
| 10 | 72 | Male | High | T4b | N2 | M0 | 4 |
| 11 | 72 | Male | Low | Ta | N0 | M0 | Ta |
| 12 | 81 | Male | Low | Ta | N0 | M0 | Ta |
| 13 | 76 | Female | High | Ta | N0 | M0 | Ta |
| 14 | 73 | Male | Low | Ta | N0 | M0 | Ta |
| 15 | 46 | Male | Low | Ta | N0 | M0 | Ta |
| 16 | 82 | Male | High | T1 | N0 | M0 | 1 |
| 17 | 79 | Male | High | Ta | N0 | M0 | Ta |
| 18 | 33 | Male | High | T1 | N0 | M0 | 1 |
| 19 | 75 | Male | Low | Ta | N0 | M0 | Ta |
| 20 | 64 | Female | Low | Ta | N0 | M0 | Ta |
